# Supplementary material for: An economical approach for peptide synthesisviaregioselective C–N bond cleavage of lactams
Source: Royal Society of Chemistry journal article supplement (doi:10.1039/d2sc01466a), 2022-01-01

**Supplementary Information for**  
**An Economical Approach for Peptide Synthesis *via* Regioselective C–N Bond**  
**Cleavage of Lactams**

Wataru Muramatsu\* and Hisashi Yamamoto\*

\*Corresponding authors. Email for W.M.: [muramatsu@isc.chubu.ac.jp](mailto:muramatsu@isc.chubu.ac.jp)

Email for H.Y.: [hyamamoto@isc.chubu.ac.jp](mailto:hyamamoto@isc.chubu.ac.jp)

**This PDF file includes:**

Materials and Methods  
References  
HPLC data  
NMR data

## Table of contents

|                                                                      |     |
|----------------------------------------------------------------------|-----|
| 1. General                                                           | S3  |
| 2. General procedure for the neutralization of amino acid HCl salts  | S4  |
| 3. Preparation of tris[(1,1,1,3,3,3-hexafluoropropan-2-yl)oxy]silane | S5  |
| 4. Properties of lactams <b>1a–k</b> (Table 1)                       | S6  |
| 5. Properties of dipeptides <b>2a–k</b> (Table 1)                    | S9  |
| 6. Properties of lactams <b>3a–m</b> (Scheme 2)                      | S18 |
| 7. Properties of peptides <b>2aa–ab</b> , <b>4a–m</b> (Scheme 2)     | S24 |
| 8. Properties of lactams <b>5a–k</b> (Scheme 3)                      | S41 |
| 9. Properties of peptides <b>6a–k</b> (Scheme 3)                     | S52 |
| 10. Synthesis of hexapeptides (Scheme 4)                             | S77 |
| 11. References                                                       | S81 |
| 12. HPLC data                                                        | S82 |
| 13. NMR data                                                         | S92 |



## 1. General

NMR spectra were recorded on a JEOL 400SS spectrometer operating at 400 MHz and 100 MHz, for  $^1\text{H}$  and  $^{13}\text{C}$  acquisitions, respectively. Chemical shifts are reported in ppm with a solvent resonance as an internal standard ( $^1\text{H}$  NMR; tetramethylsilane,  $\text{CD}_3\text{OD}$ ,  $\text{D}_2\text{O}$ , and  $\text{CDCl}_3$  as internal standard, indicating 0, 3.31, 4.79, and 7.26 ppm, respectively,  $^{13}\text{C}$  NMR;  $(\text{CD}_3)_2\text{SO}$ ,  $\text{CD}_3\text{OD}$ , and  $\text{CDCl}_3$  as internal standard, indicating 39.52, 49.00, and 77.00 ppm,  $^{29}\text{Si}$  NMR; tetramethylsilane as internal standard, indicating 0 ppm). Data is reported as follows: s = singlet, br = broad, d = doublet, t = triplet, q = quartet, quin = quintet, m = multiplet; coupling constants in Hz; integration. FT-IR spectra were recorded with a Bruker ALPHA (Eco-ATR) spectrometer. Specific rotation was measured with an ATAGO AP-300 digital polarimeter. MS spectra were recorded with a JEOL JMS-T100CS “AccuTOF CS” mass spectrometer with electrospray ionization time-of flight (ESI-TOF) for HRMS measurements. E.r. values were determined by high performance liquid chromatography (HPLC) using a Shimadzu CBM 20A HPLC equipped with Shimadzu SPD-M20A photodiode array detector and DAICEL IA-3, IE-3, and IG-3 columns (4.6 mm x 25 cm). Removal of amino acid esters were performed by using ULVAC KIKO GLD-137CC small oil rotary vacuum pump and ULVAC KIKO VPC-051A oil diffusion pump. TLC analysis was performed on commercial glass plates bearing a 0.25 mm layer of Merck KGaA TLC silica gel 60 F254. Silica gel chromatography was carried out Merck KGaA silica gel 60 (230–400 mesh ASTM). Dry solvents, DCM and  $\text{CHCl}_3$ , were purchased from FUJIFILM Wako Pure Chemical Co. These solvents were used without further treatment. Amino acids and their derivatives were purchased from Accela ChemBio Inc., Acros Organics, Advanced ChemBlocks Inc., AmBeed, Inc., Apollo Scientific Ltd., BLD Pharmatech Ltd., Cayman Chemical Company, Chem-Impex Int’l Inc. Chemspace LLC., Combi-Blocks, Inc., Sigma-Aldrich Co. LLC., Synthonic, Inc., Tokyo Chemical Industry Co., Ltd., Toronto Research Chemicals, Inc., and Watanabe Chemical Ind., Ltd. Trichlorosilane and 1,1,1,3,3,3-hexafluoro-2-propanol were purchased from Tokyo Chemical Industry Co., Ltd. Amberlyst<sup>TM</sup> A21 was purchased from Organo corporation.

## 2. General procedure for the neutralization of amino acid HCl salts

A flame-dried 500 mL round-bottom flask with a magnetic stirring bar (Sm-Co) and nitrogen balloon was charged with amino acid *tert*-butyl ester HCl salt (5.0 g) and Amberlyst A21 (10 g, 200 wt%), and DCM or CHCl<sub>3</sub> (150 ~ 400 mL: choice of the *solvents and their volumes are depended on the solubility of the amino acid ester HCl salts*). After the resulting mixture was stirred under nitrogen atmosphere for 4 h ~ overnight at 0 °C to ambient temperature, the mixture was filtered on celite with DCM, then the filtrate was concentrated in *vacuo* (70 Torr) with the aid of a rotary evaporator and water bath without heating. The residue was transferred into 50 mL vials by a pipette, and further concentrated in *vacuo* (70 Torr) at ambient temperature for overnight. 3Å MS was added to the free amine, then it was stored in a freezer (See, E. L. Baker, M. M. Yamano, Y. Zhou, S. M. Anthony and N. K Garg, *Nat. Commun.* 2016, **7**, 11554).

### 3. Preparation of tris[(1,1,1,3,3,3-hexafluoropropan-2-yl)oxy]silane

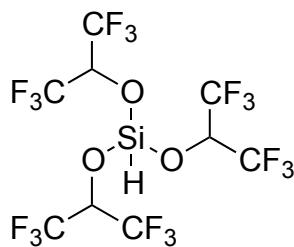

**Tris[(1,1,1,3,3,3-hexafluoropropan-2-yl)oxy]silane (CAS No. 2473688-54-7)<sup>1</sup>:**

Tris[(1,1,1,3,3,3-hexafluoropropan-2-yl)oxy]silane was prepared from commercially available trichlorosilane (Tokyo Chemical Industry Co., Ltd., T0398) and 1,1,1,3,3,3-hexafluoro-2-propanol (Tokyo Chemical Industry Co., Ltd., H0424) according to the literature method.<sup>1</sup>

<sup>1</sup>H NMR (400 MHz, CD<sub>2</sub>Cl<sub>2</sub>) δ 4.79 (s, 1H, SiH), 4.75–4.60 (m, 3H, OCH(CF<sub>3</sub>)<sub>2</sub>). <sup>13</sup>C NMR (100 MHz, CDCl<sub>3</sub>) δ 120.6 (q, 6C, *J* = 280.6 Hz), 70.3 (quin, 3C, *J* = 35.0 Hz); <sup>29</sup>Si NMR (80 MHz, CD<sub>2</sub>Cl<sub>2</sub>) δ -63.1. IR (thin film, cm<sup>-1</sup>) 2253, 1377, 1301, 1231, 1198, 1151, 1104, 900, 859, 732, 686

#### 4. Properties of lactams 1a–k (Table 1)

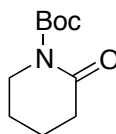

***N*-Boc-2-piperidone (1a, CAS No. 85908-96-9):** *N*-Boc-2-piperidone was purchased from Tokyo Chemical Industry Co., Ltd. (B3788) and used as delivered.

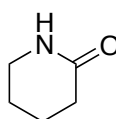

**2-Piperidone (1b, CAS No. 675-20-7):** 2-Piperidone was purchased from Tokyo Chemical Industry Co., Ltd. (P0455) and used as delivered.

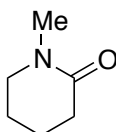

***N*-Me-2-Piperidone (1c, CAS No. 931-20-4):** *N*-Bn-2-piperidone was purchased from Sigma-Aldrich Co. LLC. (M73788) and used as delivered.

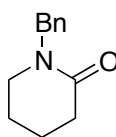

***N*-Bn-2-Piperidone (1d, CAS No. 4783-65-7):** *N*-Bn-2-piperidone was purchased from Sigma-Aldrich Co. LLC. (496898) and used as delivered.

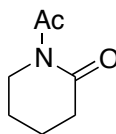

***N*-Ac-2-piperidone (1e, CAS No. 3326-13-4):** *N*-Ac-2-piperidone was purchased from BLD Pharmatech Ltd. (BD142931) and used as delivered.

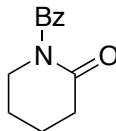

***N*-Bz-2-piperidone (1f, CAS No. 4252-56-6):** *N*-Bz-2-piperidone was purchased from Enamine Ltd. (EN300-207021) and used as delivered.

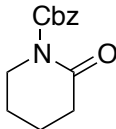

***N*-Cbz-2-piperidone (1g, CAS No. 106412-35-5):** *N*-Cbz-2-piperidone was purchased from Sigma-Aldrich Co. LLC. (737534) and used as delivered.

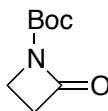

***N*-Boc-2-azetidinone (1h, CAS No. 1140510-99-1):** *N*-Boc-2-azetidinone was purchased from Apollo Scientific Ltd. (OR925839) and used as delivered.

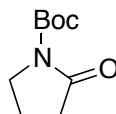

***N*-Boc-2-pyrrolidinone (1i, CAS No. 85909-08-6):** *N*-Boc-2-pyrrolidinone was purchased from Combi-Blocks, Inc. (SS-7905) and used as delivered.

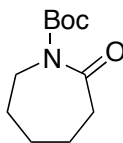

***N*-Boc-ε-caprolactam (1j, CAS No. 106412-36-6):** *N*-Boc-ε-caprolactam was purchased from Sigma-Aldrich Co. LLC. (719706) and used as delivered.

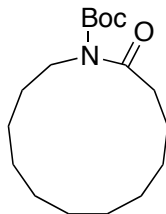

***N*-Boc- $\lambda$ -caprolactam (1k, CAS No. 370861-81-7)<sup>2</sup>:** *N*-Boc- $\lambda$ -caprolactam was prepared from commercially available  $\omega$ -laurinlactam (Tokyo Chemical Industry Co., Ltd., L0092), Boc<sub>2</sub>O (Tokyo Chemical Industry Co., Ltd., D1547), DMAP (FUJIFILM Wako Pure Chemical Co., 042-19212), and triethylamine (FUJIFILM Wako Pure Chemical Co., 202-02646) according to the literature method.<sup>2</sup>

$R_f$  = 0.33 (10% AcOEt in hexane). <sup>1</sup>H NMR (400 MHz, CDCl<sub>3</sub>)  $\delta$  3.90–3.75 (m, 2H, CH<sub>2</sub>CH<sub>2</sub>CH<sub>2</sub>CH<sub>2</sub>CH<sub>2</sub>CH<sub>2</sub>CH<sub>2</sub>CH<sub>2</sub>CH<sub>2</sub>CH<sub>2</sub>CH<sub>2</sub>), 3.00–3.85 (m, 2H, CH<sub>2</sub>CH<sub>2</sub>CH<sub>2</sub>CH<sub>2</sub>CH<sub>2</sub>CH<sub>2</sub>CH<sub>2</sub>CH<sub>2</sub>CH<sub>2</sub>CH<sub>2</sub>CH), 1.80–1.65 (m, 2H, CH<sub>2</sub>CH<sub>2</sub>CH<sub>2</sub>CH<sub>2</sub>CH<sub>2</sub>CH<sub>2</sub>CH<sub>2</sub>CH<sub>2</sub>CH<sub>2</sub>CH<sub>2</sub>CH<sub>2</sub>), 1.65–1.50 (m, 2H, CH<sub>2</sub>CH<sub>2</sub>CH<sub>2</sub>CH<sub>2</sub>CH<sub>2</sub>CH<sub>2</sub>CH<sub>2</sub>CH<sub>2</sub>CH<sub>2</sub>CH<sub>2</sub>CH<sub>2</sub>), 1.53 (s, 9H, CO<sub>2</sub>C(CH<sub>3</sub>)<sub>3</sub>), 1.44 (s, 9H, (CH<sub>3</sub>)<sub>3</sub>COCON), 1.40–1.20 (m, 14H, CH<sub>2</sub>CH<sub>2</sub>CH<sub>2</sub>CH<sub>2</sub>CH<sub>2</sub>CH<sub>2</sub>CH<sub>2</sub>CH<sub>2</sub>CH<sub>2</sub>CH<sub>2</sub>CH<sub>2</sub>CH<sub>2</sub>). <sup>13</sup>C NMR (100 MHz, CDCl<sub>3</sub>)  $\delta$  177.0, 153.7, 82.6, 43.9, 37.9, 28.0 (3C), 27.6, 26.9, 26.5, 25.7, 25.2, 25.0 (2C), 24.9, 24.1. IR (thin film, cm<sup>-1</sup>) 2930, 2862, 21728, 1689, 1459, 1367, 1351, 1337, 1282, 1257, 1220.

## 5. Properties of dipeptides 2a–k (Table 1)

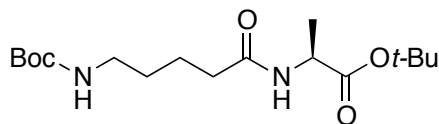

**Boc- $\delta$ -HoGly-L-Ala-Ot-Bu (2a, entry 1):** A flame-dried 5.0 mL screw-cap vial equipped with a magnetic stirring bar (Sm-Co) was charged with *N*-Boc-2-piperidone (**1a**, 99.6 mg, 0.50 mmol) and H-L-Ala-Ot-Bu (145.2 mg, 1.0 mmol). After the vial was sealed with screw-cap, the resulting mixture was stirred vigorously at 30 °C for 12 h. The reaction mixture was diluted with CHCl<sub>3</sub> (3.0 mL), transferred onto SiO<sub>2</sub> column by a pipette, and used vial and pipette were washed with CHCl<sub>3</sub> (12 mL). The reaction mixture was purified directly by flash column chromatography (30–100% AcOEt in hexane) to provide the title compound **2a** (171.4 mg, >99% yield) as a colorless oil with >99:1 er.

$R_f$  = 0.56 (80% AcOEt in hexane).  $[\alpha]_D^{22} = -34.8$  ( $c$  1.18, MeOH). <sup>1</sup>H NMR (400 MHz, CDCl<sub>3</sub>)  $\delta$  6.20 (br d,  $J$  = 7.1 Hz, 1H, NH), 4.74 (br t,  $J$  = 6.0 Hz, 1H, (CH<sub>3</sub>)<sub>3</sub>COCONH), 4.46 (quin,  $J$  = 7.1 Hz, 1H, CHCH<sub>3</sub>), 3.13 (q,  $J$  = 6.0 Hz, 2H, CH<sub>2</sub>CH<sub>2</sub>CH<sub>2</sub>CH<sub>2</sub>), 2.23 (t,  $J$  = 7.3 Hz, 2H, CH<sub>2</sub>CH<sub>2</sub>CH<sub>2</sub>CH<sub>2</sub>), 1.75–1.40 (m, 4H, CH<sub>2</sub>CH<sub>2</sub>CH<sub>2</sub>CH<sub>2</sub>), 1.47 (s, 9H, CO<sub>2</sub>C(CH<sub>3</sub>)<sub>3</sub>), 1.44 (s, 9H, (CH<sub>3</sub>)<sub>3</sub>COCONH), 1.36 (d,  $J$  = 7.1 Hz, 3H, CHCH<sub>3</sub>). <sup>13</sup>C NMR (100 MHz, CDCl<sub>3</sub>)  $\delta$  172.4, 172.1, 156.0, 81.9, 79.1, 48.5, 39.9, 35.8, 29.4, 28.4 (3C), 27.9 (3C), 22.6, 18.7. IR (thin film, cm<sup>-1</sup>) 3316, 2977, 2933, 1713, 1692, 1651, 1523, 1454, 1366, 1246, 1147. HRMS (ESI) calculated for C<sub>17</sub>H<sub>32</sub>N<sub>2</sub>O<sub>5</sub>Na [M+Na]<sup>+</sup>  $m/z$  367.2209, found, 367.2223.

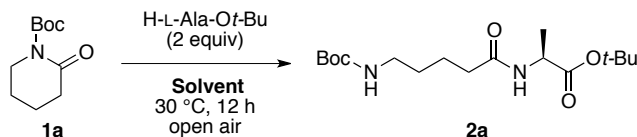

| solvent           | yield of <b>2a</b> (%) | solvent                     | yield of <b>2a</b> (%) | solvent                            | yield of <b>2a</b> (%) |
|-------------------|------------------------|-----------------------------|------------------------|------------------------------------|------------------------|
| no solvent        | 99                     | 2-Me-THF                    | 69                     | DMA                                | 42                     |
| toluene           | 74                     | 1,4-dioxane                 | 46                     | DMSO                               | 29                     |
| benzene           | 58                     | <i>i</i> -Pr <sub>2</sub> O | 81                     | NBP                                | 65                     |
| PhCl              | 53                     | TBME                        | 76                     | H <sub>2</sub> O                   | 32                     |
| CHCl <sub>3</sub> | 47                     | DME                         | 58                     | EtOH                               | 48                     |
| DCM               | 52                     | AcOEt                       | 55                     | <i>i</i> -PrOH                     | 46                     |
| CPME              | 88                     | MeCN                        | 55                     | <i>t</i> -BuOH                     | 74                     |
| THF               | 61                     | DMF                         | 52                     | CF <sub>3</sub> CH <sub>2</sub> OH | 17                     |

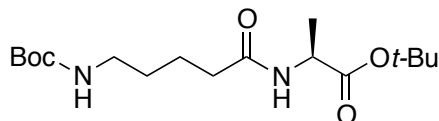

**Boc- $\delta$ -HoGly-L-Ala-Ot-Bu (2a, entry 2):** A flame-dried 20 mL screw-cap vial equipped with a magnetic stirring bar (Sm-Co) was charged with *N*-Boc-2-piperidone (**1a**, 1.20 g, 6.0 mmol) and H-L-Ala-Ot-Bu (1.74 g, 12 mmol). After the vial was sealed with screw-cap, the resulting mixture was stirred vigorously at 30 °C for 12 h. The reaction mixture was diluted with CHCl<sub>3</sub> (6.0 mL), transferred onto SiO<sub>2</sub> column by a pipette, and used vial and pipette were washed with CHCl<sub>3</sub> (12 mL). The reaction mixture was purified directly by flash column chromatography (30–100% AcOEt in hexane) to provide the title compound **2a** (2.00 g, 97% yield) as a white solid with >99:1 er.

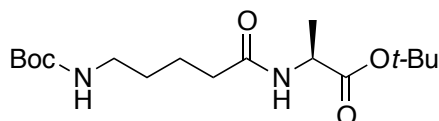

**Boc- $\delta$ -HoGly-L-Ala-Ot-Bu (2a, entry 3):** A flame-dried 5.0 mL screw-cap vial equipped with a magnetic stirring bar (Sm-Co) was charged with *N*-Boc-2-piperidone (**1a**, 199.3 mg, 1.0 mmol) and H-L-Ala-Ot-Bu (72.6 mg, 0.5 mmol). After the vial was sealed with screw-cap, the resulting mixture was stirred vigorously at 30 °C for 12 h. The reaction mixture was diluted with CHCl<sub>3</sub> (3.0 mL), transferred onto SiO<sub>2</sub> column by a pipette, and used vial and pipette were washed with CHCl<sub>3</sub> (12 mL). The reaction mixture was purified directly by flash column chromatography (30–100% AcOEt in hexane) to provide the title compound **2a** (157.9 mg, 92% yield) as a white solid with >99:1 er.

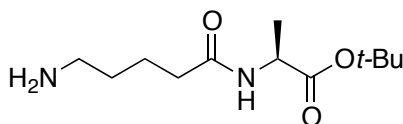

**H- $\delta$ -HoGly-L-Ala-Ot-Bu (2b, entry 19):** A flame-dried 5.0 mL screw-cap vial equipped with a magnetic stirring bar (Sm-Co) was charged with 2-piperidone (**1b**, 49.6 mg, 0.50 mmol) and H-L-Ala-Ot-Bu (145.2 mg, 1.0 mmol). After the vial was sealed with screw-cap, the resulting mixture was stirred vigorously at 30 °C for 12 h. The title compound **2b** was not produced.



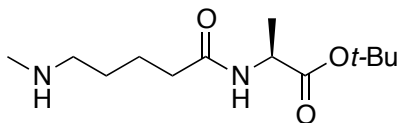

**Me- $\delta$ -HoGly-L-Ala-Ot-Bu (2c, entry 20):** A flame-dried 5.0 mL screw-cap vial equipped with a magnetic stirring bar (Sm-Co) was charged with *N*-Me-2-piperidone (**1c**, 56.6 mg, 0.50 mmol) and H-L-Ala-Ot-Bu (145.2 mg, 1.0 mmol). After the vial was sealed with screw-cap, the resulting mixture was stirred vigorously at 30 °C for 12 h. The title compound **2c** was not produced.

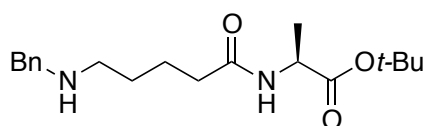

**Bn- $\delta$ -HoGly-L-Ala-Ot-Bu (2d, entry 21):** A flame-dried 5.0 mL screw-cap vial equipped with a magnetic stirring bar (Sm-Co) was charged with *N*-Bn-2-piperidone (**1d**, 94.6 mg, 0.50 mmol) and H-L-Ala-Ot-Bu (145.2 mg, 1.0 mmol). After the vial was sealed with screw-cap, the resulting mixture was stirred vigorously at 30 °C for 12 h. The title compound **2d** was not produced.

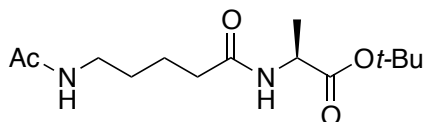

**Ac- $\delta$ -HoGly-L-Ala-Ot-Bu (2e, entry 22):** A flame-dried 5.0 mL screw-cap vial equipped with a magnetic stirring bar (Sm-Co) was charged with *N*-Ac-2-piperidone (**1e**, 70.6 mg, 0.5 mmol) and H-L-Ala-Ot-Bu (145.2 mg, 1.0 mmol). After the vial was sealed with screw-cap, the resulting mixture was stirred vigorously at 30 °C for 12 h. The reaction mixture was diluted with CHCl<sub>3</sub> (3.0 mL), transferred onto SiO<sub>2</sub> column by a pipette, and used vial and pipette were washed with CHCl<sub>3</sub> (12 mL). The reaction mixture was purified directly by flash column chromatography (30–100% AcOEt in hexane) to provide the undesired compound Ac-L-Ala-Ot-Bu (CAS No. 75552-90-8). The title compound **2e** was not produced.

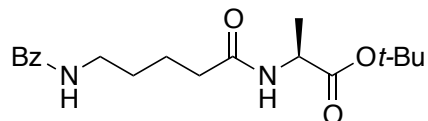

**Bz- $\delta$ -HoGly-L-Ala-Ot-Bu (2f, entry 23):** A flame-dried 5.0 mL screw-cap vial equipped with a magnetic stirring bar (Sm-Co) was charged with *N*-Bz-2-piperidone (**1f**, 101.6 mg, 0.50 mmol) and H-L-Ala-Ot-Bu (145.2 mg, 1.0 mmol). After the vial was sealed with screw-cap, the resulting mixture was stirred vigorously at 30 °C for 12 h. The reaction mixture was diluted with CHCl<sub>3</sub> (3.0 mL), transferred onto SiO<sub>2</sub> column by a pipette, and used vial and pipette were washed with CHCl<sub>3</sub> (12 mL). The reaction mixture was purified directly by flash column chromatography (50–100% AcOEt in hexane) to provide the title compound **2f** (8.8 mg, 5% yield) as a colorless oil and undesired Bz-L-Ala-Ot-Bu (CAS No. 67617-34-9).

$R_f$  = 0.35 (AcOEt).  $[\alpha]_D^{20}$  = –40.6 (*c* 1.06, MeOH). <sup>1</sup>H NMR (400 MHz, CDCl<sub>3</sub>)  $\delta$  7.90–7.75 (m, 2H, C<sub>6</sub>H<sub>5</sub>CONH), 7.55–7.35 (m, 3H, C<sub>6</sub>H<sub>5</sub>CONH), 6.76 (br t, *J* = 6.0 Hz, 1H, C<sub>6</sub>H<sub>5</sub>CONH), 6.21 (br d, *J* = 7.3 Hz, 1H, NH), 4.45 (quin, *J* = 7.3 Hz, 1H, CHCH<sub>3</sub>), 3.46 (td, *J* = 6.4, 6.0 Hz, 2H, CH<sub>2</sub>CH<sub>2</sub>CH<sub>2</sub>CH<sub>2</sub>), 2.40–2.20 (m, 2H, CH<sub>2</sub>CH<sub>2</sub>CH<sub>2</sub>CH<sub>2</sub>), 1.80–1.60 (m, 4H, CH<sub>2</sub>CH<sub>2</sub>CH<sub>2</sub>CH<sub>2</sub>), 1.46 (s, 9H, CO<sub>2</sub>C(CH<sub>3</sub>)<sub>3</sub>), 1.36 (d, *J* = 7.3 Hz, 3H, CHCH<sub>3</sub>). <sup>13</sup>C NMR (100 MHz, CDCl<sub>3</sub>)  $\delta$  172.3 (2C), 167.5, 134.6, 131.2, 128.4 (2C), 126.9 (2C), 81.9, 48.5, 39.2, 35.5, 28.7, 27.9 (3C), 22.3, 18.5. IR (thin film, cm<sup>–1</sup>) 3291, 3064, 2978, 1734, 1637, 1536, 1454, 1367, 1306, 1224, 1146. HRMS (ESI) calculated for C<sub>19</sub>H<sub>28</sub>N<sub>2</sub>O<sub>4</sub>Na [M+Na]<sup>+</sup> *m/z* 371.1947, found, 371.1903.

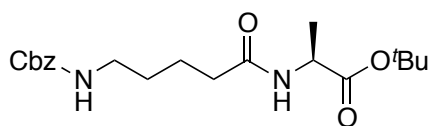

**Cbz- $\delta$ -HoGly-L-Ala-Ot-Bu (2g, entry 24):** A flame-dried 5.0 mL screw-cap vial equipped with a magnetic stirring bar (Sm-Co) was charged with *N*-Cbz-2-piperidone (**1g**, 116.6 mg, 0.50 mmol) and H-L-Ala-Ot-Bu (145.2 mg, 1.0 mmol). After the vial was sealed with screw-cap, the resulting mixture was stirred vigorously at 30 °C for 12 h. The reaction mixture was diluted with CHCl<sub>3</sub> (3.0 mL), transferred onto SiO<sub>2</sub> column by a pipette, and used vial and pipette were washed with CHCl<sub>3</sub> (12 mL). The reaction mixture was purified directly by flash column chromatography (30–100% AcOEt in hexane) to provide the title compound **2g** (81.6 mg, 43% yield) as a white solid with >99:1 er and undesired Cbz-L-Ala-Ot-Bu (CAS No. 50300-96-4).

$R_f = 0.48$  (80% AcOEt in hexane). M.p. 61–62 °C.  $[\alpha]_D^{28} = -35.3$  ( $c$  1.22, MeOH).  $^1\text{H}$  NMR (400 MHz,  $\text{CDCl}_3$ )  $\delta$  7.40–7.25 (m, 5H,  $\text{C}_6\text{H}_5\text{CH}_2\text{OCONH}$ ), 6.16 (br d,  $J = 7.3$  Hz, 1H,  $\text{NH}$ ), 5.09 (s, 2H,  $\text{C}_6\text{H}_5\text{CH}_2\text{OCONH}$ ), 5.02 (br t,  $J = 6.4$  Hz, 1H,  $\text{C}_6\text{H}_5\text{CH}_2\text{OCONH}$ ), 4.45 (quin,  $J = 7.3$  Hz, 1H,  $\text{CHCH}_3$ ), 3.20 (q,  $J = 6.4$  Hz, 2H,  $\text{CH}_2\text{CH}_2\text{CH}_2\text{CH}_2$ ), 2.25 (dd,  $J = 15.5, 7.3$  Hz, 1H,  $\text{CH}_2\text{CH}_2\text{CH}_2\text{CH}_2$ ), 2.19 (dd,  $J = 15.5, 6.8$  Hz, 1H,  $\text{CH}_2\text{CH}_2\text{CH}_2\text{CH}_2$ ), 1.75–1.60 (m, 2H,  $\text{CH}_2\text{CH}_2\text{CH}_2\text{CH}_2$ ), 1.60–1.45 (m, 2H,  $\text{CH}_2\text{CH}_2\text{CH}_2\text{CH}_2$ ), 1.46 (s, 9H,  $\text{CO}_2\text{C}(\text{CH}_3)_3$ ), 1.35 (d,  $J = 7.3$  Hz, 3H,  $\text{CHCH}_3$ ).  $^{13}\text{C}$  NMR (100 MHz,  $\text{CDCl}_3$ )  $\delta$  172.4, 172.0, 156.4, 136.6, 128.4 (2C), 128.0, 128.0 (2C), 81.9, 66.5, 48.4, 40.4, 35.7, 29.2, 27.9 (3C), 22.4, 18.6. IR (thin film,  $\text{cm}^{-1}$ ) 3344, 3307, 2977, 2948, 1736, 1679, 1652, 1538, 1517, 1210, 1155. HRMS (ESI) calculated for  $\text{C}_{20}\text{H}_{30}\text{N}_2\text{O}_5\text{Na}$   $[\text{M}+\text{Na}]^+$   $m/z$  401.2052, found, 401.2044.

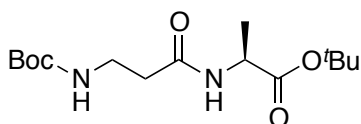

**Boc-β-HoGly-L-Ala-Ot-Bu (2h, entry 25):** A flame-dried 5.0 mL screw-cap vial equipped with a magnetic stirring bar (Sm-Co) was charged with *N*-Boc-2-azetidinone (**1h**, 85.6 mg, 0.50 mmol) and H-L-Ala-Ot-Bu (145.2 mg, 1.0 mmol). After the vial was sealed with screw-cap, the resulting mixture was stirred vigorously at 50 °C for 12 h. The reaction mixture was diluted with  $\text{CHCl}_3$  (3.0 mL), transferred onto  $\text{SiO}_2$  column by a pipette, and used vial and pipette were washed with  $\text{CHCl}_3$  (12 mL). The reaction mixture was purified directly by flash column chromatography (50–100% AcOEt in hexane) to provide the title compound **2h** (143.9 mg, 91% yield) as a colorless oil with >99:1 er.

$R_f = 0.60$  (80% AcOEt in hexane).  $[\alpha]_D^{16} = -39.8$  ( $c$  1.03, MeOH).  $^1\text{H}$  NMR (400 MHz,  $\text{CDCl}_3$ )  $\delta$  6.19 (br d,  $J = 7.1$  Hz, 1H,  $\text{NH}$ ), 5.22 (br t,  $J = 6.2$  Hz, 1H,  $(\text{CH}_3)_3\text{COCONH}$ ), 4.45 (quin,  $J = 7.1$  Hz, 1H,  $\text{CHCH}_3$ ), 3.41 (dt,  $J = 6.2, 6.0$  Hz, 2H,  $\text{CH}_2\text{CH}_2$ ), 2.42 (t,  $J = 6.0$  Hz, 2H,  $\text{CH}_2\text{CH}_2$ ), 1.47 (s, 9H,  $\text{CO}_2\text{C}(\text{CH}_3)_3$ ), 1.43 (s, 9H,  $(\text{CH}_3)_3\text{COCONH}$ ), 1.37 (d,  $J = 7.1$  Hz, 3H,  $\text{CHCH}_3$ ).  $^{13}\text{C}$  NMR (100 MHz,  $\text{CDCl}_3$ )  $\delta$  172.2, 170.9, 156.0, 82.0, 79.2, 48.6, 36.5, 36.1, 28.4 (3C), 27.9 (3C), 18.5. IR (thin film,  $\text{cm}^{-1}$ ) 3323, 2978, 2935, 1714, 1651, 1516, 1454, 1366, 1246, 1147, 1049. HRMS (ESI) calculated for  $\text{C}_{15}\text{H}_{28}\text{N}_2\text{O}_5\text{Na}$   $[\text{M}+\text{Na}]^+$   $m/z$  339.1896, found, 339.1944.

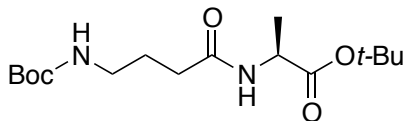

**Boc- $\gamma$ -HoGly-L-Ala-Ot-Bu (2i, entry 26):** A flame-dried 5.0 mL screw-cap vial equipped with a magnetic stirring bar (Sm-Co) was charged with *N*-Boc-2-pyrrolidinone (**1i**, 92.6 mg, 0.50 mmol) and H-L-Ala-Ot-Bu (217.8 mg, 1.5 mmol). After the vial was sealed with screw-cap, the resulting mixture was stirred vigorously at 50 °C for 24 h. The reaction mixture was diluted with CHCl<sub>3</sub> (3.0 mL), transferred onto SiO<sub>2</sub> column by a pipette, and used vial and pipette were washed with CHCl<sub>3</sub> (12 mL). The reaction mixture was purified directly by flash column chromatography (50–100% AcOEt in hexane) to provide the title compound **2i** (120.6 mg, 73% yield) as a colorless oil with >99:1 er.

$R_f$  = 0.43 (80% AcOEt in hexane).  $[\alpha]_D^{25} = -25.0$  ( $c$  1.16, MeOH). <sup>1</sup>H NMR (400 MHz, CDCl<sub>3</sub>)  $\delta$  6.43 (br d,  $J$  = 7.1 Hz, 1H, NH), 4.90–4.70 (m, 1H, (CH<sub>3</sub>)<sub>3</sub>COCONH), 4.45 (quin,  $J$  = 7.1 Hz, 1H, CHCH<sub>3</sub>), 3.30–3.10 (m, 2H, CH<sub>2</sub>CH<sub>2</sub>CH<sub>2</sub>), 2.30–2.20 (m, 2H, CH<sub>2</sub>CH<sub>2</sub>CH<sub>2</sub>), 1.90–1.75 (m, 2H, CH<sub>2</sub>CH<sub>2</sub>CH<sub>2</sub>), 1.47 (s, 9H, CO<sub>2</sub>C(CH<sub>3</sub>)<sub>3</sub>), 1.44 (s, 9H, (CH<sub>3</sub>)<sub>3</sub>COCONH), 1.37 (d,  $J$  = 7.1 Hz, 3H, CHCH<sub>3</sub>). <sup>13</sup>C NMR (100 MHz, CDCl<sub>3</sub>)  $\delta$  172.4, 171.9, 156.2, 81.9, 79.2, 48.6, 39.8, 33.5, 28.4 (3C), 27.9 (3C), 26.0, 18.5. IR (thin film, cm<sup>-1</sup>) 3314, 2978, 2934, 1692, 1651, 1523, 1453, 1366, 1249, 1147, 1048. HRMS (ESI) calculated for C<sub>16</sub>H<sub>30</sub>N<sub>2</sub>O<sub>5</sub>Na [M+Na]<sup>+</sup>  $m/z$  353.2052, found, 353.2053.

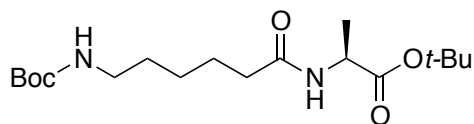

**Boc- $\epsilon$ -HoGly-L-Ala-Ot-Bu (2j, entry 27):** A flame-dried 5.0 mL screw-cap vial equipped with a magnetic stirring bar (Sm-Co) was charged with *N*-Boc- $\epsilon$ -caprolactam (**1j**, 106.6 mg, 0.50 mmol) and H-L-Ala-Ot-Bu (145.2 mg, 1.0 mmol). After the vial was sealed with screw-cap, the resulting mixture was stirred vigorously at 30 °C for 12 h. The reaction mixture was diluted with CHCl<sub>3</sub> (3.0 mL), transferred onto SiO<sub>2</sub> column by a pipette, and used vial and pipette were washed with CHCl<sub>3</sub> (12 mL). The reaction mixture was purified directly by flash column chromatography (30–100% AcOEt in hexane) to provide the title compound **2j** (162.2 mg, 90% yield) as a colorless oil with >99:1 er.

$R_f = 0.50$  (80% AcOEt in hexane).  $[\alpha]_D^{25} = -28.1$  ( $c$  1.14, MeOH).  $^1\text{H}$  NMR (400 MHz,  $\text{CDCl}_3$ )  $\delta$  6.05 (br d,  $J = 7.1$  Hz, 1H,  $\text{NH}$ ), 4.65–4.50 (m, 1H,  $(\text{CH}_3)_3\text{COCONH}$ ), 4.47 (quin,  $J = 7.1$  Hz, 1H,  $\text{CHCH}_3$ ), 3.20–3.00 (m, 2H,  $\text{CH}_2\text{CH}_2\text{CH}_2\text{CH}_2\text{CH}_2$ ), 2.30–2.15 (m, 2H,  $\text{CH}_2\text{CH}_2\text{CH}_2\text{CH}_2\text{CH}_2$ ), 1.75–1.60 (m, 2H,  $\text{CH}_2\text{CH}_2\text{CH}_2\text{CH}_2\text{CH}_2$ ), 1.60–1.25 (m, 4H,  $\text{CH}_2\text{CH}_2\text{CH}_2\text{CH}_2\text{CH}_2$ ), 1.47 (s, 9H,  $\text{CO}_2\text{C}(\text{CH}_3)_3$ ), 1.44 (s, 9H,  $(\text{CH}_3)_3\text{COCONH}$ ), 1.36 (d,  $J = 7.1$  Hz, 3H,  $\text{CHCH}_3$ ).  $^{13}\text{C}$  NMR (100 MHz,  $\text{CDCl}_3$ )  $\delta$  172.5, 172.1, 156.0, 81.9, 79.0, 48.4, 40.3, 36.3, 29.7, 28.4 (3C), 27.9 (3C), 25.1, 18.7. IR (thin film,  $\text{cm}^{-1}$ ) 3320, 2978, 2934, 1693, 1652, 1525, 1454, 1366, 1247, 1148, 1046. HRMS (ESI) calculated for  $\text{C}_{18}\text{H}_{34}\text{N}_2\text{O}_5\text{Na}$   $[\text{M}+\text{Na}]^+$   $m/z$  381.2365, found, 381.2358.

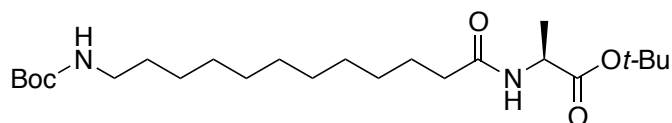

**Boc- $\lambda$ -HoGly-L-Ala-Ot-Bu (2k, entry 28):** A flame-dried 5.0 mL screw-cap vial equipped with a magnetic stirring bar (Sm-Co) was charged with *N*-Boc- $\lambda$ -caprolactam (**1k**, 146.2 mg, 0.50 mmol) and H-L-Ala-Ot-Bu (217.8 mg, 1.5 mmol). After the vial was sealed with screw-cap, the resulting mixture was stirred vigorously at 50 °C for 24 h. The reaction mixture was diluted with  $\text{CHCl}_3$  (3.0 mL), transferred onto  $\text{SiO}_2$  column by a pipette, and used vial and pipette were washed with  $\text{CHCl}_3$  (12 mL). The reaction mixture was purified directly by flash column chromatography (30–80% AcOEt in hexane) to provide the title compound **2k** (143.8 mg, 65% yield) as a white solid with >99:1 er.

$R_f = 0.61$  (50% AcOEt in hexane). M.p. 72–74 ° C.  $[\alpha]_D^{22} = -48.2$  ( $c$  1.64, MeOH).  $^1\text{H}$  NMR (400 MHz,  $\text{CDCl}_3$ )  $\delta$  6.08 (br d,  $J = 7.1$  Hz, 1H,  $\text{NH}$ ), 4.60–4.50 (m, 1H,  $(\text{CH}_3)_3\text{COCONH}$ ), 4.47 (quin,  $J = 7.1$  Hz, 1H,  $\text{CHCH}_3$ ), 3.10 (q,  $J = 6.4$  Hz, 2H,  $\text{CH}_2\text{CH}_2\text{CH}_2\text{CH}_2\text{CH}_2\text{CH}_2\text{CH}_2\text{CH}_2\text{CH}_2\text{CH}_2$ ), 2.30–2.10 (m, 2H,  $\text{CH}_2\text{CH}_2\text{CH}_2\text{CH}_2\text{CH}_2\text{CH}_2\text{CH}_2\text{CH}_2\text{CH}_2\text{CH}_2$ ), 1.70–1.55 (m, 2H,  $\text{CH}_2\text{CH}_2\text{CH}_2\text{CH}_2\text{CH}_2\text{CH}_2\text{CH}_2\text{CH}_2\text{CH}_2\text{CH}_2$ ), 1.55–1.20 (m, 16H,  $\text{CH}_2\text{CH}_2\text{CH}_2\text{CH}_2\text{CH}_2\text{CH}_2\text{CH}_2\text{CH}_2\text{CH}_2\text{CH}_2\text{CH}_2\text{CH}_2\text{CH}_2\text{CH}_2$ ), 1.47 (s, 9H,  $\text{CO}_2\text{C}(\text{CH}_3)_3$ ), 1.44 (s, 9H,  $(\text{CH}_3)_3\text{COCONH}$ ), 1.36 (d,  $J = 7.1$  Hz, 3H,  $\text{CHCH}_3$ ).  $^{13}\text{C}$  NMR (100 MHz,  $\text{CDCl}_3$ )  $\delta$  172.5, 172.4, 155.9, 81.9, 78.9, 48.4, 40.6, 36.6, 30.0, 29.4, 29.4, 29.3, 29.2, 29.2, 29.2, 28.4 (3C), 27.9

(3C), 26.7, 25.5, 18.8. IR (thin film,  $\text{cm}^{-1}$ ) 3338, 2920, 2850, 1737, 1696, 1661, 1524, 1455, 1365, 1235, 1151. HRMS (ESI) calculated for  $\text{C}_{24}\text{H}_{46}\text{N}_2\text{O}_5\text{Na}$   $[\text{M}+\text{Na}]^+$   $m/z$  465.3304, found, 465.3308.

## 6. Properties of lactams 3a–m (Scheme 2)

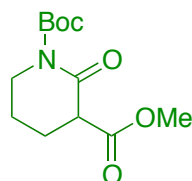

***rac*-Methyl *N*-Boc-2-oxopiperidine-3-carboxylate (3a, CAS No. 400073-68-9):** *rac*-Methyl *N*-Boc-2-oxopiperidine-3-carboxylate was purchased from Accela ChemBio Inc. (SY026045) and used as delivered.

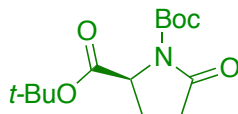

**Boc-L-Pyr-O*t*-Bu (3b, CAS No. 91229-91-3):** Boc-L-Pyr-O*t*-Bu was purchased from Tokyo Chemical Industry Co., Ltd. (B5216) and used as delivered.

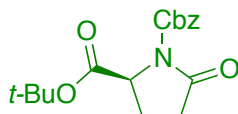

**Cbz-L-Pyr-O*t*-Bu (3c, CAS No. 81470-51-1):** Cbz-L-Pyr-O*t*-Bu was purchased from AmBeed, Inc. (A346058) and used as delivered.

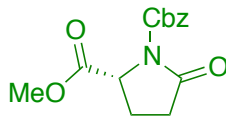

**Cbz-D-Pyr-OMe (3d, CAS No. 690211-34-8):** Cbz-D-Pyr-OMe was purchased from Combi-Blocks, Inc. (YC-2555) and used as delivered.

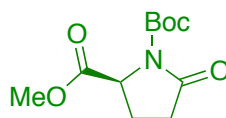

**Boc-L-Pyr-OMe (3e, CAS No. 108963-96-8):** Boc-L-Pyr-OMe was purchased from Tokyo Chemical Industry Co., Ltd. (M2803) and used as delivered.

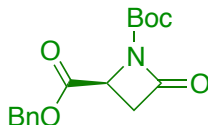

**(S)-Benzyl N-Boc-4-oxoazetidine-2-carboxylate (3f, CAS No. 146849-54-9)<sup>3</sup>:** (S)-Benzyl N-Boc-4-oxoazetidine-2-carboxylate was prepared from commercially available (S)-benzyl 4-oxoazetidine-2-carboxylate (Sigma-Aldrich Co. LLC., 468975), Boc<sub>2</sub>O (Tokyo Chemical Industry Co., Ltd., D1547), DMAP (FUJIFILM Wako Pure Chemical Co., 042-19212), and triethylamine (FUJIFILM Wako Pure Chemical Co., 202-02646) according to the literature method.<sup>3</sup>

$R_f$  = 0.33 (20% AcOEt in hexane). <sup>1</sup>H NMR (400 MHz, CDCl<sub>3</sub>)  $\delta$  7.45–7.30 (m, 5H, CO<sub>2</sub>CH<sub>2</sub>CH<sub>5</sub>), 5.27 (d,  $J$  = 12.1 Hz, 1H, CO<sub>2</sub>CH2C<sub>6</sub>H<sub>5</sub>), 5.20 (d,  $J$  = 12.1 Hz, 1H, CO<sub>2</sub>CH2C<sub>6</sub>H<sub>5</sub>), 4.42 (dd,  $J$  = 6.6, 3.2 Hz, 1H, CH2CO), 3.25 (dd,  $J$  = 15.8, 6.6 Hz, 1H, CHCH2CO), 2.98 (dd,  $J$  = 15.8, 3.2 Hz, 1H, CHCH2CO), 1.45 (s, 9H, (CH<sub>3</sub>)<sub>3</sub>COCON). <sup>13</sup>C NMR (100 MHz, CDCl<sub>3</sub>)  $\delta$  169.1, 162.1, 146.8, 134.8, 128.7 (3C), 128.5 (2C), 84.0, 67.6, 49.6, 41.3, 27.8. IR (thin film, cm<sup>-1</sup>) 2979, 1813, 1723, 1456, 1324, 1253, 1187, 1145, 1094, 1044, 1032.

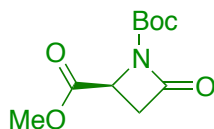

**(S)-Methyl N-Boc-4-oxoazetidine-2-carboxylate (3g, CAS No. 107020-13-3)<sup>4</sup>:** (S)-Methyl N-Boc-4-oxoazetidine-2-carboxylate was prepared from commercially available (S)-1-Boc-azetidine-2-carboxylic acid methyl ester (Synthonic, Inc., A8195), NaIO<sub>4</sub> (FUJIFILM Wako Pure Chemical Co., 199-02401), and RuO<sub>2</sub> hydrate (Sigma-Aldrich Co. LLC., 208833-1G) according to the literature method.<sup>4</sup>

$R_f$  = 0.40 (30% AcOEt in hexane). <sup>1</sup>H NMR (400 MHz, CDCl<sub>3</sub>)  $\delta$  4.39 (dd,  $J$  = 6.6, 3.2 Hz, 1H, CH2CO), 3.82 (s, 3H, CO<sub>2</sub>CH3), 3.26 (dd,  $J$  = 15.8, 6.6 Hz, 1H, CHCH2CO), 3.00 (dd,  $J$  = 15.8, 3.2 Hz, 1H, CHCH2CO), 1.51 (s, 9H, (CH<sub>3</sub>)<sub>3</sub>COCON). <sup>13</sup>C NMR (100 MHz, CDCl<sub>3</sub>)  $\delta$



169.7, 162.2, 146.9, 84.0, 52.7, 49.4, 41.2, 27.9. IR (thin film,  $\text{cm}^{-1}$ ) 2982, 1814, 1720, 1439, 1324, 1254, 1217, 1144, 1098, 1045, 1031.

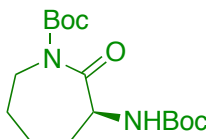

**(S)-N,N'-di-Boc-3-aminoazepan-2-one (3h):** A flame-dried 200 mL round-bottom flask equipped with a magnetic stirring bar (Sm-Co) and nitrogen balloon was charged with commercially available (*S*)-3-aminoazepan-2-one hydrochloride (1.0 g, 6.07 mmol), DMAP (2.23 g, 18.2 mmol),  $\text{Boc}_2\text{O}$  (3.98 g, 18.2 mmol), and  $\text{DCM-CHCl}_3$  (5:2, 70 mL). After  $\text{Et}_3\text{N}$  (2.54 mL, 18.2 mmol) was added to the mixture at 0 °C, the resulting mixture was stirred under nitrogen atmosphere at room temperature for overnight. Next, the reaction mixture was transferred to a separatory funnel with  $\text{CHCl}_3$  (200 mL) and saturated aqueous solution of  $\text{NH}_4\text{Cl}$  (100 mL) was added. The phases were separated and aqueous layer was extracted with  $\text{CHCl}_3$  (2 x 100 mL). The organic phase was washed with water (50 mL) and brine (50 mL), and then dried over  $\text{MgSO}_4$ , filtered, concentrated in *vacuo* with the aid of a rotary evaporator and water bath without heating. The crude product was then diluted with  $\text{CHCl}_3$  (15 mL), transferred onto  $\text{SiO}_2$  column by a pipette, and used round-bottom flask and pipette were washed with  $\text{CHCl}_3$  (2 x 5 mL). The crude product was purified by flash column chromatography (30–100%  $\text{AcOEt}$  in hexane) to provide (*S*)-*N*-Boc-3-aminoazepan-2-one (CAS No. 76944-95-1, 824.6 mg, 59% yield). A flame-dried 200 mL round-bottom flask equipped with a magnetic stirring bar (Sm-Co) and nitrogen balloon was charged with (*S*)-*N*-Boc-3-aminoazepan-2-one (CAS No. 76944-95-1, 804.6 mg, 3.52 mmol), DMAP (861.2 mg, 7.05 mmol),  $\text{Boc}_2\text{O}$  (1.54 g, 7.05 mmol), and  $\text{DCM}$  (50 mL). After  $\text{Et}_3\text{N}$  (0.49 mL, 3.52 mmol) was added to the mixture at 0 °C, the resulting mixture was stirred under nitrogen atmosphere at room temperature for overnight. Next, the reaction mixture was transferred to a separatory funnel with  $\text{CHCl}_3$  (200 mL) and saturated aqueous solution of  $\text{NH}_4\text{Cl}$  (100 mL) was added. The phases were separated and aqueous layer was extracted with  $\text{CHCl}_3$  (2 x 100 mL). The organic phase was washed with water (50 mL) and brine (50 mL), and then dried over  $\text{MgSO}_4$ , filtered, concentrated in *vacuo* with the aid of a rotary evaporator and water bath without heating. The crude product was then diluted with  $\text{CHCl}_3$  (15 mL), transferred onto  $\text{SiO}_2$  column by a pipette, and used round-bottom flask and

pipette were washed with CHCl<sub>3</sub> (2 x 5 mL). The crude product was purified by flash column chromatography (10–30% AcOEt in hexane) to provide the title compound **3h** (1.10 g, 95% yield) as a colorless oil.

$R_f$  = 0.40 (20% AcOEt in hexane).  $[\alpha]_D^{24}$  = +6.7 ( $c$  1.20, MeOH). <sup>1</sup>H NMR (400 MHz, CDCl<sub>3</sub>)  $\delta$  5.83 (d,  $J$  = 6.6 Hz, 1H, (CH<sub>3</sub>)<sub>3</sub>COCONH), 4.54 (ddd,  $J$  = 11.0, 6.6, 1.8 Hz, 1H, CHCH<sub>2</sub>CH<sub>2</sub>CH<sub>2</sub>CH<sub>2</sub>NCO<sub>2</sub>C(CH<sub>3</sub>)<sub>3</sub>), 4.29 (ddt,  $J$  = 15.4, 5.0, 1.6 Hz, 1H, CHCH<sub>2</sub>CH<sub>2</sub>CH<sub>2</sub>CH<sub>2</sub>NCO<sub>2</sub>C(CH<sub>3</sub>)<sub>3</sub>), 3.31 (dd,  $J$  = 15.4, 11.2 Hz, 1H, CHCH<sub>2</sub>CH<sub>2</sub>CH<sub>2</sub>CH<sub>2</sub>NCO<sub>2</sub>C(CH<sub>3</sub>)<sub>3</sub>), 2.15–1.40 (m, 6H, CHCH<sub>2</sub>CH<sub>2</sub>CH<sub>2</sub>CH<sub>2</sub>NCO<sub>2</sub>C(CH<sub>3</sub>)<sub>3</sub>), 1.53 (s, 9H, (CH<sub>3</sub>)<sub>3</sub>COCONH), 1.44 (s, 9H, CHCH<sub>2</sub>CH<sub>2</sub>CH<sub>2</sub>CH<sub>2</sub>NCO<sub>2</sub>C(CH<sub>3</sub>)<sub>3</sub>). <sup>13</sup>C NMR (100 MHz, CDCl<sub>3</sub>)  $\delta$  173.2, 155.1, 152.5, 83.6, 79.6, 54.9, 45.4, 33.0, 28.3 (3C), 27.9 (3C), 27.7, 27.2. IR (thin film, cm<sup>-1</sup>) 3429, 2978, 2933, 1774, 1698, 1486, 1366, 1279, 1254, 1136, 1055. HRMS (ESI) calculated for C<sub>16</sub>H<sub>28</sub>N<sub>2</sub>O<sub>5</sub>Na [M+Na]<sup>+</sup>  $m/z$  351.1896, found, 351.1900.

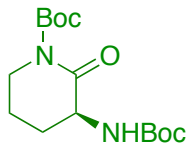

***tert*-Butyl (3*S*)-3-[[*tert*-butoxy]carbonyl]amino}-2-oxopiperidine-1-carboxylate (**3i**, CAS No. 1277168-39-4):** A flame-dried 200 mL round-bottom flask equipped with a magnetic stirring bar (Sm-Co) and nitrogen balloon was charged with commercially available (*S*)-*tert* butyl (2-oxopiperidin-3-yl)carbamate (1.50 g, 7.0 mmol), DMAP (1.71 g, 14.0 mmol), Boc<sub>2</sub>O (3.06 g, 14.0 mmol), and DCM (70 mL). After Et<sub>3</sub>N (0.98 mL, 7.0 mmol) was added to the mixture at 0 °C, the resulting mixture was stirred under nitrogen atmosphere at room temperature for overnight. Next, the reaction mixture was transferred to a separatory funnel with CHCl<sub>3</sub> (200 mL) and saturated aqueous solution of NH<sub>4</sub>Cl (100 mL) was added. The phases were separated and aqueous layer was extracted with CHCl<sub>3</sub> (2 x 100 mL). The organic phase was washed with water (50 mL) and brine (50 mL), and then dried over MgSO<sub>4</sub>, filtered, concentrated in *vacuo* with the aid of a rotary evaporator and water bath without heating. The crude product was then diluted with CHCl<sub>3</sub> (15 mL), transferred onto SiO<sub>2</sub> column by a pipette, and used round-bottom flask and pipette were washed with CHCl<sub>3</sub> (2 x 5 mL). The crude product was purified by flash column chromatography (20–50% AcOEt in hexane) to provide the title compound **3i** (1.67 g, 76% yield) as a colorless oil.

$R_f = 0.45$  (30% AcOEt in hexane).  $^1\text{H}$  NMR (400 MHz,  $\text{CDCl}_3$ )  $\delta$  5.50 (br s, 1H,  $(\text{CH}_3)_3\text{COCONH}$ ), 4.35–4.20 (m, 1H,  $\text{CHCH}_2\text{CH}_2\text{CH}_2\text{NCO}_2\text{C}(\text{CH}_3)_3$ ), 3.99 (dt,  $J = 13.5, 5.9$  Hz, 1H,  $\text{CHCH}_2\text{CH}_2\text{CH}_2\text{NCO}_2\text{C}(\text{CH}_3)_3$ ), 3.52 (ddd,  $J = 13.5, 8.4, 5.3$  Hz, 1H,  $\text{CHCH}_2\text{CH}_2\text{CH}_2\text{NCO}_2\text{C}(\text{CH}_3)_3$ ), 2.60–2.45 (m, 1H,  $\text{CHCH}_2\text{CH}_2\text{CH}_2\text{NCO}_2\text{C}(\text{CH}_3)_3$ ), 2.00–1.80 (m, 2H,  $\text{CHCH}_2\text{CH}_2\text{CH}_2\text{NCO}_2\text{C}(\text{CH}_3)_3$ ), 1.60–1.45 (m, 1H,  $\text{CHCH}_2\text{CH}_2\text{CH}_2\text{NCO}_2\text{C}(\text{CH}_3)_3$ ), 1.53 (s, 9H,  $(\text{CH}_3)_3\text{COCONH}$ ), 1.45 (s, 9H,  $\text{CHCH}_2\text{CH}_2\text{CH}_2\text{NCO}_2\text{C}(\text{CH}_3)_3$ ).  $^{13}\text{C}$  NMR (100 MHz,  $\text{CDCl}_3$ )  $\delta$  171.2, 155.5, 151.9, 83.5, 79.8, 52.6, 43.8, 28.3 (3C), 27.9 (3C), 26.8, 20.3. IR (thin film,  $\text{cm}^{-1}$ ) 3389, 2978, 2933, 1773, 1705, 1495, 1366, 1279, 1242, 1142, 1054.

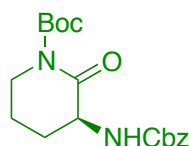

**tert-Butyl (3S)-3-[(benzyloxy)carbonyl]amino-2-oxopiperidine-1-carboxylate (3j, CAS No. 1277168-36-1):** *tert*-Butyl (3S)-3-[(benzyloxy)carbonyl]amino-2-oxopiperidine-1-carboxylate was purchased from Chemspace LLC. (BBV-300822848) and used as delivered.

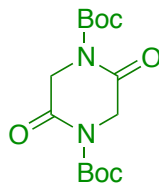

**Cyclo(-Boc-Gly-Boc-Gly-) (3k, CAS No. 151692-07-8)<sup>5</sup>:** Cyclo(-Boc-Gly-Boc-Gly-) was prepared from commercially available Cyclo(-Gly-Gly-) (Kanto Chemical Co. Inc., 17568-31),  $\text{Boc}_2\text{O}$  (Tokyo Chemical Industry Co., Ltd., D1547), DMAP (FUJIFILM Wako Pure Chemical Co., 042-19212), and triethylamine (FUJIFILM Wako Pure Chemical Co., 202-02646) according to the literature method.<sup>5</sup>

$R_f = 0.36$  (30% AcOEt in hexane). M.p. 140–143 °C.  $^1\text{H}$  NMR (400 MHz,  $\text{CDCl}_3$ )  $\delta$  4.43 (s, 4H,  $\text{CH}_2$ ), 1.54 (s, 18H,  $(\text{CH}_3)_3\text{COCON}$ ).  $^{13}\text{C}$  NMR (100 MHz,  $\text{CDCl}_3$ )  $\delta$  164.4 (2C), 149.5 (2C), 85.1 (2C), 49.5 (2C), 27.9 (6C). IR (thin film,  $\text{cm}^{-1}$ ) 2982, 1787, 1726, 1715, 1366, 1293, 1248, 1206, 1139, 1085, 846.

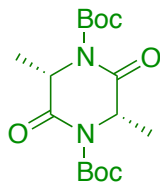

**Cyclo(-Boc-L-Ala-Boc-L-Ala-) (3l, CAS No. 959865-87-3)<sup>5</sup>:** A flame-dried 200 mL round-bottom flask equipped with a magnetic stirring bar (Sm-Co) and nitrogen balloon was charged with commercially available Cyclo(-L-Ala-L-Ala-) (4.26 g, 30.0 mmol), DMAP (733.0 mg, 6.0 mmol), Boc<sub>2</sub>O (26.2 g, 120.0 mmol), and CHCl<sub>3</sub>–DMF (35:1, 36 mL). After Et<sub>3</sub>N (8.33 mL, 60.0 mmol) was added to the mixture at 0 °C, the resulting mixture was stirred under nitrogen atmosphere at room temperature for overnight. Next, the reaction mixture was transferred to a separatory funnel with CHCl<sub>3</sub> (200 mL) and saturated aqueous solution of NH<sub>4</sub>Cl (100 mL) was added. The phases were separated and aqueous layer was extracted with CHCl<sub>3</sub> (2 x 100 mL). The organic phase was washed with water (50 mL) and brine (50 mL), and then dried over MgSO<sub>4</sub>, filtered, concentrated in *vacuo* with the aid of a rotary evaporator and water bath. The crude product was then diluted with CHCl<sub>3</sub> (15 mL), transferred onto SiO<sub>2</sub> column by a pipette, and used round-bottom flask and pipette were washed with CHCl<sub>3</sub> (2 x 5 mL). The crude product was purified by flash column chromatography (10–50% AcOEt in hexane) to provide the title compound **3l** (9.45 g, 92% yield) as a white solid.

R<sub>f</sub> = 0.52 (30% AcOEt in hexane). M.p. 101–102 °C. <sup>1</sup>H NMR (400 MHz, CDCl<sub>3</sub>) δ <sup>1</sup>H NMR (400 MHz, CDCl<sub>3</sub>) δ 4.87 (q, *J* = 7.4 Hz, 2H, CHCH<sub>3</sub>), 1.64 (d, *J* = 7.4 Hz, 6H, CHCH<sub>3</sub>), 1.55 (s, 18H, (CH<sub>3</sub>)<sub>3</sub>COCON). <sup>13</sup>C NMR (100 MHz, CDCl<sub>3</sub>) δ 168.0 (2C), 149.8 (2C), 84.8 (2C), 56.0 (2C), 27.9 (6C), 20.4 (2C). IR (thin film, cm<sup>-1</sup>) 2979, 2942, 1768, 1722, 1696, 1459, 1368, 1238, 1142, 1080, 1029.

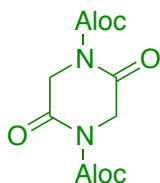

**Cyclo(-Aloc-Gly-Aloc-Gly-) (3m):** A flame-dried 200 mL round-bottom flask equipped with a magnetic stirring bar (Sm-Co) and nitrogen balloon was charged with commercially available Cyclo(-Gly-Gly-) (1.39 g, 12.2 mmol), DMAP (149.2 g, 1.22 mmol), and DMF (50 mL). After

AlO<sub>2</sub>O (5.0 g, 26.9 mmol) was added to the mixture at room temperature, the resulting mixture was stirred under nitrogen atmosphere at room temperature for overnight. Next, the reaction mixture was transferred to a separatory funnel with CHCl<sub>3</sub> (200 mL) and saturated aqueous solution of NH<sub>4</sub>Cl (100 mL) was added. The phases were separated and aqueous layer was extracted with CHCl<sub>3</sub> (2 x 100 mL). The organic phase was washed with water (50 mL) and brine (50 mL), and then dried over MgSO<sub>4</sub>, filtered, concentrated in *vacuo* with the aid of a rotary evaporator and water bath. The crude product was then diluted with CHCl<sub>3</sub> (15 mL), transferred onto SiO<sub>2</sub> column by a pipette, and used round-bottom flask and pipette were washed with CHCl<sub>3</sub> (2 x 5 mL). The crude product was purified by flash column chromatography (10–80% AcOEt in hexane) to provide the title compound **3m** (355.3 mg, 10% yield) as a colorless oil.

R<sub>f</sub> = 0.42 (50% AcOEt in hexane). <sup>1</sup>H NMR (400 MHz, CDCl<sub>3</sub>) δ 5.96 (ddt, *J* = 17.2, 10.3, 5.7 Hz, 2H, CH<sub>2</sub>CHCH<sub>2</sub>OCON), 5.45 (ddd, *J* = 17.2, 2.5, 1.2 Hz, 2H, CH<sub>2</sub>CHCH<sub>2</sub>OCON), 5.33 (ddd, *J* = 10.3, 2.5, 1.2 Hz, 2H, CH<sub>2</sub>CHCH<sub>2</sub>OCON), 4.79 (dt, *J* = 5.7, 1.2 Hz, 4H, CH<sub>2</sub>CHCH<sub>2</sub>OCON), 4.55 (s, 4H, CH<sub>2</sub>). <sup>13</sup>C NMR (100 MHz, CDCl<sub>3</sub>) δ 163.8 (2C), 151.2 (2C), 130.5 (2C), 119.9 (2C), 68.5 (2C), 49.5 (2C). IR (thin film, cm<sup>-1</sup>) 2945, 1782, 1717, 1438, 1363, 1297, 1276, 1085, 985, 933, 768. HRMS (ESI) calculated for C<sub>12</sub>H<sub>14</sub>N<sub>2</sub>O<sub>6</sub>Na [M+Na]<sup>+</sup> *m/z* 305.0750, found, 305.0799.

## 7. Properties of peptides 2aa–ab, 4a–m (Scheme 2)

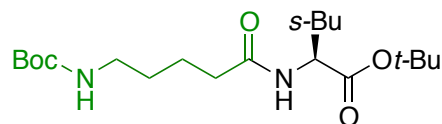

**Boc- $\delta$ -HoGly-L-Ile-Ot-Bu (2aa):** A flame-dried 5.0 mL screw-cap vial equipped with a magnetic stirring bar (Sm-Co) was charged with *N*-Boc-2-piperidone (**1a**, 99.6 mg, 0.50 mmol) and H-L-Ile-Ot-Bu (187.3 mg, 1.0 mmol). After the vial was sealed with screw-cap, the resulting mixture was stirred vigorously at 50 °C for 24 h. The reaction mixture was diluted with CHCl<sub>3</sub> (3.0 mL), transferred onto SiO<sub>2</sub> column by a pipette, and used vial and pipette were washed with CHCl<sub>3</sub> (12 mL). The reaction mixture was purified directly by flash column chromatography (10–80% AcOEt in hexane) to provide the title compound **2aa** (192.5 mg, >99% yield) as a colorless oil with >99:1 dr.

$R_f$  = 0.71 (80% AcOEt in hexane).  $[\alpha]_D^{29}$  = –19.5 ( $c$  1.08, MeOH). <sup>1</sup>H NMR (400 MHz, CDCl<sub>3</sub>)  $\delta$  6.07 (br d,  $J$  = 8.5 Hz, 1H, NH), 4.68 (br t,  $J$  = 6.4 Hz, 1H, (CH<sub>3</sub>)<sub>3</sub>COCONH), 4.50 (dd,  $J$  = 8.5, 4.6 Hz, 1H, CHCH(CH<sub>3</sub>)CH<sub>2</sub>CH<sub>3</sub>), 3.13 (q,  $J$  = 6.4 Hz, 2H, CH<sub>2</sub>CH<sub>2</sub>CH<sub>2</sub>CH<sub>2</sub>), 2.28 (dd,  $J$  = 15.0, 7.5 Hz, 1H, CH<sub>2</sub>CH<sub>2</sub>CH<sub>2</sub>CH<sub>2</sub>), 2.22 (dd,  $J$  = 15.0, 7.5 Hz, 1H, CH<sub>2</sub>CH<sub>2</sub>CH<sub>2</sub>CH<sub>2</sub>), 1.90–1.80 (m, 1H, CHCH(CH<sub>3</sub>)CH<sub>2</sub>CH<sub>3</sub>), 1.75–1.40 (m, 5H, CH<sub>2</sub>CH<sub>2</sub>CH<sub>2</sub>CH<sub>2</sub> and CHCH(CH<sub>3</sub>)CH<sub>2</sub>CH<sub>3</sub>), 1.47 (s, 9H, CO<sub>2</sub>C(CH<sub>3</sub>)<sub>3</sub>), 1.44 (s, 9H, (CH<sub>3</sub>)<sub>3</sub>COCONH), 1.30–1.10 (m, 1H, CHCH(CH<sub>3</sub>)CH<sub>2</sub>CH<sub>3</sub>), 0.93 (t,  $J$  = 7.5 Hz, 3H, CHCH(CH<sub>3</sub>)CH<sub>2</sub>CH<sub>3</sub>), 0.90 (d,  $J$  = 6.9 Hz, 3H, CHCH(CH<sub>3</sub>)CH<sub>2</sub>CH<sub>3</sub>). <sup>13</sup>C NMR (100 MHz, CDCl<sub>3</sub>)  $\delta$  172.3, 171.2, 156.0, 82.0, 79.0, 56.5, 39.9, 38.1, 36.0, 29.4, 28.4 (3C), 28.0 (3C), 25.3, 22.6, 15.3, 11.7. IR (thin film, cm<sup>–1</sup>) 3626, 2969, 2933, 1714, 1694, 1652, 1520, 1366, 1247, 1161, 1144. HRMS (ESI) calculated for C<sub>20</sub>H<sub>38</sub>N<sub>2</sub>O<sub>5</sub>Na [M+Na]<sup>+</sup>  $m/z$  409.2678, found, 409.2661.

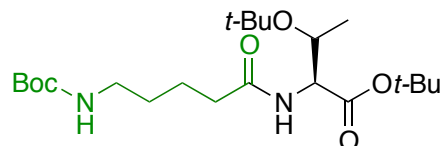

**Boc- $\delta$ -HoGly-L-Thr(*t*-Bu)-Ot-Bu (2ab):** A flame-dried 5.0 mL screw-cap vial equipped with a magnetic stirring bar (Sm-Co) was charged with *N*-Boc-2-piperidone (**1a**, 99.6 mg, 0.50 mmol)

and H-L-Thr(*t*-Bu)-*Ot*-Bu (231.3 mg, 1.0 mmol). After the vial was sealed with screw-cap, the resulting mixture was stirred vigorously at 50 °C for 24 h. The reaction mixture was diluted with CHCl<sub>3</sub> (3.0 mL), transferred onto SiO<sub>2</sub> column by a pipette, and used vial and pipette were washed with CHCl<sub>3</sub> (12 mL). The reaction mixture was purified directly by flash column chromatography (10–80% AcOEt in hexane) to provide the title compound **2ab** (214.5 mg, >99% yield) as a colorless oil with >99:1 dr.

$R_f = 0.72$  (80% AcOEt in hexane).  $[\alpha]_D^{30} = -1.0$  ( $c$  1.04, MeOH). <sup>1</sup>H NMR (400 MHz, CDCl<sub>3</sub>)  $\delta$  6.16 (br d,  $J = 9.3$  Hz, 1H, NH), 4.67 (br t,  $J = 6.3$  Hz, 1H, (CH<sub>3</sub>)<sub>3</sub>COCONH), 4.38 (dd,  $J = 9.3$ , 2.0 Hz, 1H, CHCH(CH<sub>3</sub>)OC(CH<sub>3</sub>)<sub>3</sub>), 4.20 (qd,  $J = 6.2$  Hz, 1H, CHCH(CH<sub>3</sub>)OC(CH<sub>3</sub>)<sub>3</sub>), 3.14 (q,  $J = 6.3$  Hz, 2H, CH<sub>2</sub>CH<sub>2</sub>CH<sub>2</sub>CH<sub>2</sub>), 2.30 (t,  $J = 7.5$  Hz, 2H, CH<sub>2</sub>CH<sub>2</sub>CH<sub>2</sub>CH<sub>2</sub>), 1.80–1.45 (m, 4H, CH<sub>2</sub>CH<sub>2</sub>CH<sub>2</sub>CH<sub>2</sub>), 1.46 (s, 9H, CO<sub>2</sub>C(CH<sub>3</sub>)<sub>3</sub>), 1.44 (s, 9H, (CH<sub>3</sub>)<sub>3</sub>COCONH), 1.17 (s, 9H, CHCH(CH<sub>3</sub>)OC(CH<sub>3</sub>)<sub>3</sub>), 1.13 (d,  $J = 6.2$  Hz, 3H, CHCH(CH<sub>3</sub>)OC(CH<sub>3</sub>)<sub>3</sub>). <sup>13</sup>C NMR (100 MHz, CDCl<sub>3</sub>)  $\delta$  173.0, 170.0, 156.0, 81.8, 79.0, 73.8, 67.2, 58.2, 40.0, 35.9, 29.4, 28.7 (3C), 28.4 (3C), 28.1 (3C), 22.6, 21.0. IR (thin film, cm<sup>-1</sup>) 3366, 2976, 2933, 1713, 1662, 1506, 1365, 1247, 1160, 1146, 1086. HRMS (ESI) calculated for C<sub>22</sub>H<sub>42</sub>N<sub>2</sub>O<sub>6</sub>Na [M+Na]<sup>+</sup>  $m/z$  453.2941, found, 453.2930.

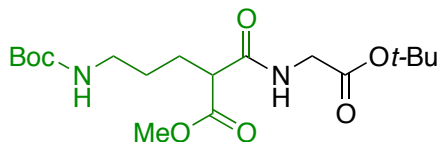

**4aa:** A flame-dried 5.0 mL screw-cap vial equipped with a magnetic stirring bar (Sm-Co) was charged with *rac*-methyl *N*-Boc-2-oxopiperidine-3-carboxylate (**3a**, 128.6 mg, 0.50 mmol) and H-Gly-*Ot*-Bu (131.2 mg, 1.0 mmol). After the vial was sealed with screw-cap, the resulting mixture was stirred vigorously at 50 °C for 12 h. The reaction mixture was diluted with CHCl<sub>3</sub> (3.0 mL), transferred onto SiO<sub>2</sub> column by a pipette, and used vial and pipette were washed with CHCl<sub>3</sub> (12 mL). The reaction mixture was purified directly by flash column chromatography (10–80% AcOEt in hexane) to provide the title compound **4aa** (184.5 mg, 95% yield) as a colorless oil.

$R_f = 0.33$  (50% AcOEt in hexane). <sup>1</sup>H NMR (400 MHz, CDCl<sub>3</sub>)  $\delta$  7.02 (br t,  $J = 5.0$  Hz, 1H, NH), 4.70 (br t,  $J = 5.7$  Hz, 1H, (CH<sub>3</sub>)<sub>3</sub>COCONH), 3.93 (d,  $J = 5.0$  Hz, 2H, CH<sub>2</sub>), 3.75 (s, 3H, CH<sub>2</sub>CH<sub>2</sub>CH<sub>2</sub>CHCO<sub>2</sub>CH<sub>3</sub>), 3.40–3.25 (m, 1H, CH<sub>2</sub>CH<sub>2</sub>CH<sub>2</sub>CHCO<sub>2</sub>CH<sub>3</sub>), 3.25–3.05 (m, 2H, CH<sub>2</sub>CH<sub>2</sub>CH<sub>2</sub>CHCO<sub>2</sub>CH<sub>3</sub>), 2.05–1.90 (m, 2H, CH<sub>2</sub>CH<sub>2</sub>CH<sub>2</sub>CHCO<sub>2</sub>CH<sub>3</sub>), 1.60–1.45 (m, 2H,

CH<sub>2</sub>CH<sub>2</sub>CH<sub>2</sub>CHCO<sub>2</sub>CH<sub>3</sub>), 1.47 (s, 9H, CO<sub>2</sub>C(CH<sub>3</sub>)<sub>3</sub>), 1.43 (s, 9H, (CH<sub>3</sub>)<sub>3</sub>COCONH). <sup>13</sup>C NMR (100 MHz, CDCl<sub>3</sub>) δ 171.7, 168.6, 168.3, 156.1, 82.3, 79.2, 52.5, 51.9, 42.1, 39.6, 28.4 (3C), 28.0 (3C), 27.6, 27.5. IR (thin film, cm<sup>-1</sup>) 3341, 2976, 2933, 1739, 1714, 1668, 1519, 1366, 1247, 1150, 1036. HRMS (ESI) calculated for C<sub>18</sub>H<sub>32</sub>N<sub>2</sub>O<sub>7</sub>Na [M+Na]<sup>+</sup> *m/z* 411.2107, found, 411.2102.

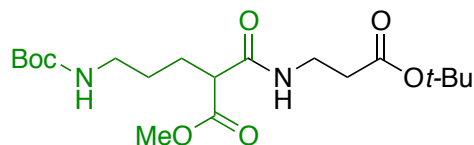

**4ab:** A flame-dried 5.0 mL screw-cap vial equipped with a magnetic stirring bar (Sm-Co) was charged with *rac*-methyl *N*-Boc-2-oxopiperidine-3-carboxylate (**3a**, 128.6 mg, 0.50 mmol) and H-β-HoGly-*Ot*-Bu (145.2 mg, 1.0 mmol). After the vial was sealed with screw-cap, the resulting mixture was stirred vigorously at 30 °C for 12 h. The reaction mixture was diluted with CHCl<sub>3</sub> (3.0 mL), transferred onto SiO<sub>2</sub> column by a pipette, and used vial and pipette were washed with CHCl<sub>3</sub> (12 mL). The reaction mixture was purified directly by flash column chromatography (30–100% AcOEt in hexane) to provide the title compound **4ab** (199.1 mg, 99% yield) as a colorless oil.

*R*<sub>f</sub> = 0.31 (50% AcOEt in hexane). <sup>1</sup>H NMR (400 MHz, CDCl<sub>3</sub>) δ 6.93 (br t, *J* = 6.2 Hz, 1H, NH), 4.64 (br t, *J* = 6.1 Hz, 1H, (CH<sub>3</sub>)<sub>3</sub>COCONH), 3.60–3.40 (m, 2H, CH<sub>2</sub>CH<sub>2</sub>), 3.73 (s, 3H, CH<sub>2</sub>CH<sub>2</sub>CH<sub>2</sub>CHCO<sub>2</sub>CH<sub>3</sub>), 3.23 (t, *J* = 7.3 Hz, 1H, CH<sub>2</sub>CH<sub>2</sub>CH<sub>2</sub>CHCO<sub>2</sub>CH<sub>3</sub>), 3.12 (q, *J* = 6.1 Hz, 2H, CH<sub>2</sub>CH<sub>2</sub>CH<sub>2</sub>CHCO<sub>2</sub>CH<sub>3</sub>), 2.45 (t, *J* = 6.2 Hz, 2H, CH<sub>2</sub>CH<sub>2</sub>), 2.00–1.85 (m, 2H, CH<sub>2</sub>CH<sub>2</sub>CH<sub>2</sub>CHCO<sub>2</sub>CH<sub>3</sub>), 1.60–1.40 (m, 2H, CH<sub>2</sub>CH<sub>2</sub>CH<sub>2</sub>CHCO<sub>2</sub>CH<sub>3</sub>), 1.46 (s, 9H, CO<sub>2</sub>C(CH<sub>3</sub>)<sub>3</sub>), 1.44 (s, 9H, (CH<sub>3</sub>)<sub>3</sub>COCONH). <sup>13</sup>C NMR (100 MHz, CDCl<sub>3</sub>) δ 171.7, 171.5, 168.1, 156.0, 81.1, 79.2, 52.4, 52.2, 39.7, 35.3, 35.0, 28.4 (3C), 28.1 (3C), 27.6, 27.4. IR (thin film, cm<sup>-1</sup>) 3300, 2978, 2937, 1727, 1715, 1695, 1661, 1520, 1366, 1248, 1154. HRMS (ESI) calculated for C<sub>19</sub>H<sub>34</sub>N<sub>2</sub>O<sub>7</sub>Na [M+Na]<sup>+</sup> *m/z* 425.2264, found, 425.2253.

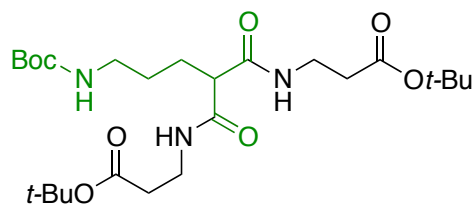



**4ac:** A flame-dried 5.0 mL screw-cap vial equipped with a magnetic stirring bar (Sm-Co) was charged with *rac*-methyl *N*-Boc-2-oxopiperidine-3-carboxylate (**3a**, 128.6 mg, 0.50 mmol), H- $\beta$ -HoGly-*Ot*-Bu (290.4 mg, 2.0 mmol), and Ta(OMe)<sub>5</sub> (16.8 mg, 0.050 mmol). After the vial was sealed with screw-cap, the resulting mixture was stirred vigorously at 50 °C for 60 h. The reaction mixture was diluted with CHCl<sub>3</sub> (3.0 mL), transferred onto SiO<sub>2</sub> column by a pipette, and used vial and pipette were washed with CHCl<sub>3</sub> (12 mL). The reaction mixture was purified directly by flash column chromatography (30–80% AcOEt in hexane) to provide the title compound **4ac** (247.5 mg, 96% yield) as a white solid.

R<sub>f</sub> = 0.15 (50% AcOEt in hexane). M.p. 75–77 °C. <sup>1</sup>H NMR (400 MHz, CDCl<sub>3</sub>)  $\delta$  7.23 (br t, *J* = 6.0 Hz, 2H, NH), 4.77 (br t, *J* = 6.4 Hz, 1H, (CH<sub>3</sub>)<sub>3</sub>COCONH), 3.60–3.35 (m, 4H, CH<sub>2</sub>CH<sub>2</sub>CO<sub>2</sub>C(CH<sub>3</sub>)<sub>3</sub>), 3.13 (q, *J* = 6.4 Hz, 2H, CH<sub>2</sub>CH<sub>2</sub>CH<sub>2</sub>CH), 3.01 (t, *J* = 7.3 Hz, 1H, CH<sub>2</sub>CH<sub>2</sub>CH<sub>2</sub>CH), 2.44 (t, *J* = 6.3 Hz, 4H, CH<sub>2</sub>CH<sub>2</sub>CO<sub>2</sub>C(CH<sub>3</sub>)<sub>3</sub>), 1.84 (q, *J* = 7.3 Hz, 2H, CH<sub>2</sub>CH<sub>2</sub>CH<sub>2</sub>CH), 1.60–1.35 (m, 2H, CH<sub>2</sub>CH<sub>2</sub>CH<sub>2</sub>CH), 1.45 (s, 18H, CH<sub>2</sub>CH<sub>2</sub>CO<sub>2</sub>C(CH<sub>3</sub>)<sub>3</sub>), 1.43 (s, 9H, (CH<sub>3</sub>)<sub>3</sub>COCONH). <sup>13</sup>C NMR (100 MHz, CDCl<sub>3</sub>)  $\delta$  171.2 (2C), 170.6 (2C), 156.0, 81.1 (2C), 79.1, 53.8, 39.6, 35.2 (2C), 35.1 (2C), 29.8, 28.4 (3C), 28.0 (6C), 27.6. IR (thin film, cm<sup>-1</sup>) 3296, 2977, 2932, 1727, 1683, 1666, 1531, 1365, 1278, 1249, 1149. HRMS (ESI) calculated for C<sub>25</sub>H<sub>45</sub>N<sub>3</sub>O<sub>8</sub>Na [M+Na]<sup>+</sup> *m/z* 538.3104, found, 538.3092.

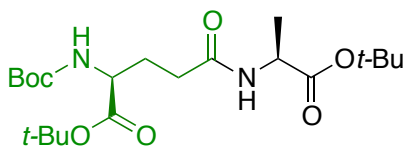

**Boc-L-Glu(L-Ala-*Ot*-Bu)-*Ot*-Bu (4ba, CAS No. 2374223-99-9)<sup>6</sup>:** A flame-dried 5.0 mL screw-cap vial equipped with a magnetic stirring bar (Sm-Co) was charged with Boc-L-Pyr-*Ot*-Bu (**3b**, 142.7 mg, 0.50 mmol) and H-L-Ala-*Ot*-Bu (217.8 mg, 1.5 mmol). After the vial was sealed with screw-cap, the resulting mixture was stirred vigorously at 60 °C for 24 h. The reaction mixture was diluted with CHCl<sub>3</sub> (3.0 mL), transferred onto SiO<sub>2</sub> column by a pipette, and used vial and pipette were washed with CHCl<sub>3</sub> (12 mL). The reaction mixture was purified directly by flash column chromatography (1–10% MeOH in CHCl<sub>3</sub>) to provide the title compound **4ba** (208.9 mg, 97% yield) as a white solid with >99:1 dr.

R<sub>f</sub> = 0.44 (5% MeOH in CHCl<sub>3</sub>). M.p. 64–65 °C. <sup>1</sup>H NMR (400 MHz, CDCl<sub>3</sub>)  $\delta$  6.42 (br d, *J* = 7.1 Hz, 1H, NH), 5.25 (br d, *J* = 7.8 Hz, 1H, (CH<sub>3</sub>)<sub>3</sub>COCONH), 4.45 (quin, *J* = 7.1 Hz, 1H,

$\text{CHCH}_3$ ), 4.25–4.10 (m, 1H,  $\text{CHCH}_2\text{CH}_2$ ), 2.35–2.25 (m, 2H,  $\text{CHCH}_2\text{CH}_2$ ), 2.25–2.10 (m, 1H,  $\text{CHCH}_2\text{CH}_2$ ), 2.00–1.80 (m, 1H,  $\text{CHCH}_2\text{CH}_2$ ), 1.47 (s, 9H,  $\text{CO}_2\text{C}(\text{CH}_3)_3$ ), 1.46 (s, 9H,  $\text{CO}_2\text{C}(\text{CH}_3)_3$ ), 1.44 (s, 9H,  $(\text{CH}_3)_3\text{COCONH}$ ), 1.38 (d,  $J = 7.1$  Hz, 3H,  $\text{CHCH}_3$ ).  $^{13}\text{C}$  NMR (100 MHz,  $\text{CDCl}_3$ )  $\delta$  172.2, 171.4, 171.3, 155.6, 82.1, 81.8, 79.7, 53.4, 48.6, 32.4, 29.0, 28.2 (3C), 27.9 (3C), 27.9 (3C), 18.5. IR (thin film,  $\text{cm}^{-1}$ ) 3365, 3301, 2977, 2936, 1733, 1704, 1661, 1525, 1366, 1151, 1057.

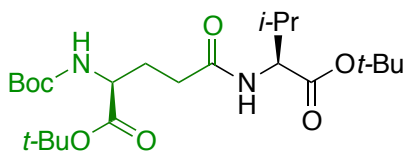

**Boc-L-Glu(L-Val-Ot-Bu)-Ot-Bu (4bb):** A flame-dried 5.0 mL screw-cap vial equipped with a magnetic stirring bar (Sm-Co) was charged with Boc-L-Pyr-Ot-Bu (**3b**, 142.7 mg, 0.50 mmol) and H-L-Val-Ot-Bu (260.0 mg, 1.5 mmol). After the vial was sealed with screw-cap, the resulting mixture was stirred vigorously at 60 °C for 24 h. The reaction mixture was diluted with  $\text{CHCl}_3$  (3.0 mL), transferred onto  $\text{SiO}_2$  column by a pipette, and used vial and pipette were washed with  $\text{CHCl}_3$  (12 mL). The reaction mixture was purified directly by flash column chromatography (10–50% AcOEt in hexane) to provide the title compound **4bb** (178.4 mg, 78% yield) as a white solid with >99:1 dr.

$R_f = 0.70$  (50% AcOEt in hexane). M.p. 105–107 °C.  $[\alpha]_D^{27} = -52.9$  ( $c$  1.02, MeOH).  $^1\text{H}$  NMR (400 MHz,  $\text{CDCl}_3$ )  $\delta$  6.38 (br d,  $J = 8.7$  Hz, 1H,  $\text{NH}$ ), 5.24 (br d,  $J = 8.4$  Hz, 1H,  $(\text{CH}_3)_3\text{COCONH}$ ), 4.45 (dd,  $J = 8.7, 4.6$  Hz, 1H,  $\text{CHCH}(\text{CH}_3)_2$ ), 4.18 (td,  $J = 8.4, 3.6$  Hz, 1H,  $\text{CHCH}_2\text{CH}_2$ ), 2.40–2.10 (m, 4H,  $\text{CHCH}_2\text{CH}_2$ ), 1.95–1.80 (m, 1H,  $\text{CHCH}(\text{CH}_3)_2$ ), 1.47 (s, 9H,  $\text{CO}_2\text{C}(\text{CH}_3)_3$ ), 1.46 (s, 9H,  $\text{CO}_2\text{C}(\text{CH}_3)_3$ ), 1.45 (s, 9H,  $(\text{CH}_3)_3\text{COCONH}$ ), 0.95 (d,  $J = 6.9$  Hz, 3H,  $\text{CHCH}(\text{CH}_3)_2$ ), 0.92 (d,  $J = 7.1$  Hz, 3H,  $\text{CHCH}(\text{CH}_3)_2$ ).  $^{13}\text{C}$  NMR (100 MHz,  $\text{CDCl}_3$ )  $\delta$  171.8, 171.4, 171.1, 155.7, 82.1, 81.8, 79.8, 57.4, 53.4, 32.6, 31.3, 29.4, 28.3 (3C), 28.0 (3C), 27.9 (3C), 18.8, 17.6. IR (thin film,  $\text{cm}^{-1}$ ) 2968, 1733, 1706, 1665, 1521, 1452, 1365, 1249, 1147, 1053, 847. HRMS (ESI) calculated for  $\text{C}_{23}\text{H}_{42}\text{N}_2\text{O}_7\text{Na}$   $[\text{M}+\text{Na}]^+$   $m/z$  481.2890, found, 481.2864.

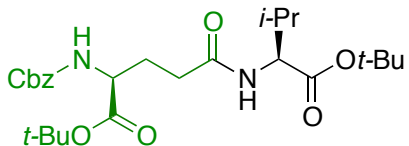

**Cbz-L-Glu(L-Val-Ot-Bu)-Ot-Bu (4c, CAS No. 161878-63-3)**<sup>7</sup>: A flame-dried 5.0 mL screw-cap vial equipped with a magnetic stirring bar (Sm-Co) was charged with Cbz-L-Pyr-Ot-Bu (**3c**, 159.7 mg, 0.50 mmol) and H-L-Val-Ot-Bu (173.3 mg, 1.0 mmol). After the vial was sealed with screw-cap, the resulting mixture was stirred vigorously at 50 °C for 24 h. The reaction mixture was diluted with CHCl<sub>3</sub> (3.0 mL), transferred onto SiO<sub>2</sub> column by a pipette, and used vial and pipette were washed with CHCl<sub>3</sub> (12 mL). The reaction mixture was purified directly by flash column chromatography (10–100% AcOEt in hexane) to provide the title compound **4c** (240.1 mg, 97% yield) as a white solid with >99:1 dr.

$R_f$  = 0.44 (50% AcOEt in hexane). M.p. 105–106 °C. <sup>1</sup>H NMR (400 MHz, CDCl<sub>3</sub>)  $\delta$  7.40–7.25 (m, 5H, C<sub>6</sub>H<sub>5</sub>CH<sub>2</sub>OCONH), 6.29 (br d,  $J$  = 8.7 Hz, 1H, NH), 5.57 (br d,  $J$  = 8.5 Hz, 1H, C<sub>6</sub>H<sub>5</sub>CH<sub>2</sub>OCONH), 5.11 (s, 2H, C<sub>6</sub>H<sub>5</sub>CH<sub>2</sub>OCONH), 4.46 (dd,  $J$  = 8.7, 4.6 Hz, 1H, CHCH(CH<sub>3</sub>)<sub>2</sub>), 4.26 (td,  $J$  = 8.5, 3.7 Hz, 1H, CHCH<sub>2</sub>CH<sub>2</sub>), 2.40–2.10 (m, 4H, CHCH<sub>2</sub>CH<sub>2</sub>), 2.00–1.80 (m, 1H, CHCH(CH<sub>3</sub>)<sub>2</sub>), 1.47 (s, 9H, CO<sub>2</sub>C(CH<sub>3</sub>)<sub>3</sub>), 1.45 (s, 9H, CO<sub>2</sub>C(CH<sub>3</sub>)<sub>3</sub>), 0.94 (d,  $J$  = 6.9 Hz, 3H, CHCH<sub>3</sub>), 0.91 (d,  $J$  = 6.8 Hz, 3H, CHCH<sub>3</sub>). <sup>13</sup>C NMR (100 MHz, CDCl<sub>3</sub>)  $\delta$  171.7, 171.1, 171.0, 156.2, 136.2, 128.5 (2C), 128.1 (2C), 82.4, 81.9, 67.0, 57.4, 53.9, 32.5, 31.4, 29.1, 28.0 (3C), 27.9 (3C), 18.8, 17.6. IR (thin film, cm<sup>-1</sup>) 3365, 3292, 2968, 2937, 1736, 1706, 1666, 1529, 1253, 1157, 1048.

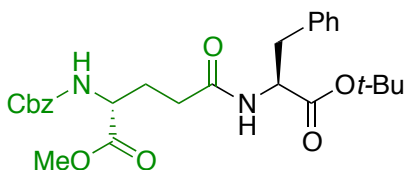

**Cbz-D-Glu(L-Phe-Ot-Bu)-OMe (4d)**: A flame-dried 5.0 mL screw-cap vial equipped with a magnetic stirring bar (Sm-Co) was charged with Cbz-D-Pyr-OMe (**3d**, 138.6 mg, 0.50 mmol) and H-L-Phe-Ot-Bu (221.3 mg, 1.0 mmol). After the vial was sealed with screw-cap, the resulting mixture was stirred vigorously at 50 °C for 24 h. The reaction mixture was diluted with CHCl<sub>3</sub> (3.0 mL), transferred onto SiO<sub>2</sub> column by a pipette, and used vial and pipette were washed with CHCl<sub>3</sub> (12 mL). The reaction mixture was purified directly by flash column chromatography

(10–100% AcOEt in hexane) to provide the title compound **4d** (178.0 mg, 76% yield) as a white solid with >99:1 dr.

$R_f$  = 0.43 (50% AcOEt in hexane). M.p. 90–91 °C.  $[\alpha]_D^{23}$  = +18.2 ( $c$  1.21, MeOH).  $^1\text{H}$  NMR (400 MHz,  $\text{CDCl}_3$ )  $\delta$  7.40–7.10 (m, 10H,  $\text{C}_6\text{H}_5\text{CH}_2\text{OCONH}$  and  $\text{CHCH}_2\text{C}_6\text{H}_5$ ), 6.28 (br d,  $J$  = 7.6 Hz, 1H,  $\text{NH}$ ), 5.70 (br d,  $J$  = 8.0 Hz, 1H,  $\text{C}_6\text{H}_5\text{CH}_2\text{OCONH}$ ), 5.10 (s, 2H,  $\text{C}_6\text{H}_5\text{CH}_2\text{OCONH}$ ), 4.73 (dt,  $J$  = 7.6, 6.2 Hz, 1H,  $\text{CHCH}_2\text{C}_6\text{H}_5$ ), 4.50–4.30 (m, 1H,  $\text{CHCH}_2\text{CH}_2$ ), 3.72 (s, 3H,  $\text{CO}_2\text{CH}_3$ ), 3.06 (d,  $J$  = 6.2 Hz, 2H,  $\text{CHCH}_2\text{C}_6\text{H}_5$ ), 2.40–2.10 (m, 3H,  $\text{CHCH}_2\text{CH}_2$ ), 2.10–1.90 (m, 1H,  $\text{CHCH}_2\text{CH}_2$ ), 1.39 (s, 9H,  $\text{CO}_2\text{C}(\text{CH}_3)_3$ ).  $^{13}\text{C}$  NMR (100 MHz,  $\text{CDCl}_3$ )  $\delta$  172.4, 171.2, 170.7, 156.2, 136.2, 136.1, 129.4 (2C), 128.5 (2C), 128.3 (2C), 128.1, 128.1 (2C), 126.9, 82.3, 67.0, 53.6, 53.5, 52.5, 38.0, 32.2, 28.2, 27.9 (3C). IR (thin film,  $\text{cm}^{-1}$ ) 3334, 2988, 1731, 1718, 1703, 1650, 1538, 1454, 1253, 1152, 1041. HRMS (ESI) calculated for  $\text{C}_{27}\text{H}_{34}\text{N}_2\text{O}_7\text{Na}$   $[\text{M}+\text{Na}]^+$   $m/z$  521.2264, found, 521.2286.

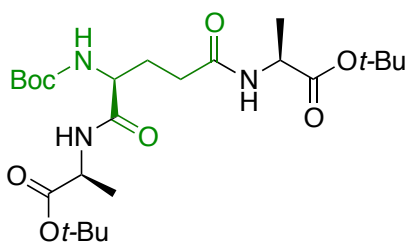

**Boc-L-Glu(L-Ala-Ot-Bu)-L-Ala-Ot-Bu (4e):** A flame-dried 5.0 mL screw-cap vial equipped with a magnetic stirring bar (Sm-Co) was charged with Boc-L-Pyr-OMe (**3e**, 121.6 mg, 0.50 mmol), H-L-Ala-Ot-Bu (290.4 mg, 2.0 mmol), and  $\text{Ta}(\text{OMe})_5$  (16.8 mg, 0.050 mmol). After the vial was sealed with screw-cap, the resulting mixture was stirred vigorously at 50 °C for 48 h. The reaction mixture was diluted with  $\text{CHCl}_3$  (3.0 mL), transferred onto  $\text{SiO}_2$  column by a pipette, and used vial and pipette were washed with  $\text{CHCl}_3$  (12 mL). The reaction mixture was purified directly by flash column chromatography (30–100% AcOEt in hexane) to provide the title compound **4e** (206.4 mg, 80% yield) as a white solid with >99:1 dr.

$R_f$  = 0.62 (80% AcOEt in hexane). M.p. 42–43 °C.  $[\alpha]_D^{28}$  = –69.4 ( $c$  1.08, MeOH).  $^1\text{H}$  NMR (400 MHz,  $\text{CDCl}_3$ )  $\delta$  8.05–7.85 (m, 1H,  $\text{NH}$ ), 7.70–7.50 (m, 1H,  $\text{NH}$ ), 5.20–5.00 (m, 1H,  $(\text{CH}_3)_3\text{COCONH}$ ), 4.80–4.40 (m, 1H,  $\text{CHCH}_2\text{CH}_2$ ), 4.53 (quin,  $J$  = 7.6 Hz, 1H,  $\text{CHCH}_3$ ), 4.10–3.80 (m, 1H,  $\text{CHCH}_3$ ), 2.40–2.10 (m, 3H,  $\text{CHCH}_2\text{CH}_2$ ), 1.90–1.70 (m, 1H,  $\text{CHCH}_2\text{CH}_2$ ), 1.48 (s, 9H,  $\text{CO}_2\text{C}(\text{CH}_3)_3$ ), 1.47 (s, 9H,  $\text{CO}_2\text{C}(\text{CH}_3)_3$ ), 1.42 (s, 9H,  $(\text{CH}_3)_3\text{COCONH}$ ), 1.39 (d,  $J$  = 7.6 Hz,

3H, CHCH<sub>3</sub>), 1.35 (d,  $J = 7.6$  Hz, 3H, CHCH<sub>3</sub>). <sup>13</sup>C NMR (100 MHz, CDCl<sub>3</sub>)  $\delta$  174.1, 172.1 (2C), 171.6, 154.6, 82.4 (2C), 79.4, 52.9, 48.4 (2C), 32.0, 29.4, 28.3 (3C), 27.9 (6C), 17.7, 17.5. IR (thin film, cm<sup>-1</sup>) 3308, 2981, 2931, 1718, 1655, 1524, 1452, 1366, 1232, 1145, 1050. HRMS (ESI) calculated for C<sub>24</sub>H<sub>43</sub>N<sub>3</sub>O<sub>8</sub>Na [M+Na]<sup>+</sup>  $m/z$  524.2948, found, 524.2918.

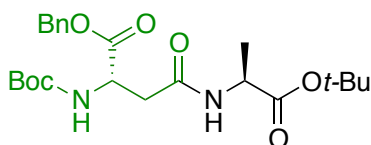

**Boc-L-Asp(L-Ala-Ot-Bu)-OBn (4f):** A flame-dried 5.0 mL screw-cap vial equipped with a magnetic stirring bar (Sm-Co) was charged with (*S*)-Benzyl *N*-Boc-4-oxoazetidine-2-carboxylate (**3f**, 152.7 mg, 0.50 mmol) and H-L-Ala-Ot-Bu (217.8 mg, 1.5 mmol). After the vial was sealed with screw-cap, the resulting mixture was stirred vigorously at 60 °C for 24 h. The reaction mixture was diluted with CHCl<sub>3</sub> (3.0 mL), transferred onto SiO<sub>2</sub> column by a pipette, and used vial and pipette were washed with CHCl<sub>3</sub> (12 mL). The reaction mixture was purified directly by flash column chromatography (10–80% AcOEt in hexane) to provide the title compound **4f** (249.9 mg, 60% yield) as a white solid with >99:1 dr.

$R_f = 0.50$  (30% AcOEt in hexane). M.p. 103–104 °C.  $[\alpha]_D^{27} = -38.3$  ( $c$  1.07, MeOH). <sup>1</sup>H NMR (400 MHz, CDCl<sub>3</sub>)  $\delta$  7.40–7.20 (m, 5H, CO<sub>2</sub>CH<sub>2</sub>C<sub>6</sub>H<sub>5</sub>), 6.20 (br d,  $J = 7.1$  Hz, 1H, NH), 5.80 (br d,  $J = 8.5$  Hz, 1H, (CH<sub>3</sub>)<sub>3</sub>COCONH), 5.21 (d,  $J = 12.4$  Hz, 1H, CO<sub>2</sub>CH<sub>2</sub>C<sub>6</sub>H<sub>5</sub>), 5.14 (d,  $J = 12.4$  Hz, 1H, CO<sub>2</sub>CH<sub>2</sub>C<sub>6</sub>H<sub>5</sub>), 4.57 (dt,  $J = 8.5, 4.4$  Hz, 1H, CHCH<sub>2</sub>), 4.39 (quin,  $J = 7.1$  Hz, 1H, CHCH<sub>3</sub>), 2.93 (dd,  $J = 15.8, 4.4$  Hz, 1H, CHCH<sub>2</sub>), 2.71 (dd,  $J = 15.8, 4.4$  Hz, 1H, CHCH<sub>2</sub>), 1.46 (s, 9H, CO<sub>2</sub>C(CH<sub>3</sub>)<sub>3</sub>), 1.42 (s, 9H, (CH<sub>3</sub>)<sub>3</sub>COCONH), 1.29 (d,  $J = 7.1$  Hz, 3H, CHCH<sub>3</sub>). <sup>13</sup>C NMR (100 MHz, CDCl<sub>3</sub>)  $\delta$  172.0, 171.3, 169.2, 155.6, 128.4 (2C), 128.2, 128.1 (2C), 82.1, 79.9, 67.2, 50.4, 48.6, 37.7, 28.2 (3C), 27.9 (3C), 18.5. IR (thin film, cm<sup>-1</sup>) 3309, 3264, 2982, 2730, 1699, 1653, 1542, 1286, 1240, 1158, 1057. HRMS (ESI) calculated for C<sub>23</sub>H<sub>34</sub>N<sub>2</sub>O<sub>7</sub>Na [M+Na]<sup>+</sup>  $m/z$  473.2264, found, 473.2240.

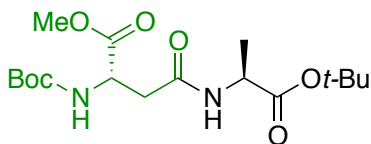

**Boc-L-Asp(L-Ala-O*t*-Bu)-OMe (4ga):** A flame-dried 5.0 mL screw-cap vial equipped with a magnetic stirring bar (Sm-Co) was charged with (*S*)-methyl *N*-Boc-4-oxoazetidine-2-carboxylate (**3g**, 114.6 mg, 0.50 mmol) and H-L-Ala-O*t*-Bu (145.2 mg, 1.0 mmol). After the vial was sealed with screw-cap, the resulting mixture was stirred vigorously at 30 °C for 24 h. The reaction mixture was diluted with CHCl<sub>3</sub> (3.0 mL), transferred onto SiO<sub>2</sub> column by a pipette, and used vial and pipette were washed with CHCl<sub>3</sub> (12 mL). The reaction mixture was purified directly by flash column chromatography (30–100% AcOEt in hexane) to provide the title compound **4ga** (147.8 mg, 79% yield) as a white solid with >99:1 dr.

$R_f$  = 0.32 (50% AcOEt in hexane). M.p. 72–73 °C.  $[\alpha]_D^{24} = -52.0$  ( $c$  1.23, MeOH). <sup>1</sup>H NMR (400 MHz, CDCl<sub>3</sub>)  $\delta$  6.22 (br d,  $J$  = 7.1 Hz, 1H, NH), 5.74 (br d,  $J$  = 8.2 Hz, 1H, (CH<sub>3</sub>)<sub>3</sub>COCONH), 4.53 (ddd,  $J$  = 8.2, 4.6, 4.2 Hz, 1H, CHCH<sub>2</sub>), 4.42 (quin,  $J$  = 7.1 Hz, 1H, CHCH<sub>3</sub>), 3.75 (s, 3H, CO<sub>2</sub>CH<sub>3</sub>), 2.92 (dd,  $J$  = 15.6, 4.2 Hz, 1H, CHCH<sub>2</sub>), 2.70 (dd,  $J$  = 15.6, 4.6 Hz, 1H, CHCH<sub>2</sub>), 1.47 (s, 9H, CO<sub>2</sub>C(CH<sub>3</sub>)<sub>3</sub>), 1.44 (s, 9H, (CH<sub>3</sub>)<sub>3</sub>COCONH), 1.35 (d,  $J$  = 7.1 Hz, 3H, CHCH<sub>3</sub>). <sup>13</sup>C NMR (100 MHz, CDCl<sub>3</sub>)  $\delta$  172.0, 171.9, 169.2, 155.6, 82.1, 79.9, 52.5, 50.3, 48.6, 37.8, 28.3 (3C), 27.9 (3C), 18.5. IR (thin film, cm<sup>-1</sup>) 3296, 2979, 1732, 1697, 1657, 1542, 1365, 1286, 1239, 1159, 1058. HRMS (ESI) calculated for C<sub>17</sub>H<sub>30</sub>N<sub>2</sub>O<sub>7</sub>Na [M+Na]<sup>+</sup>  $m/z$  397.1951, found, 397.1932.

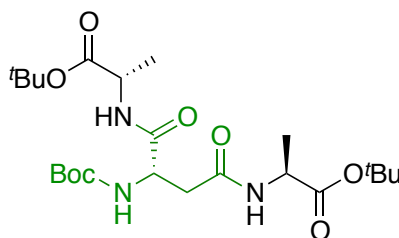

**Boc-L-Asp(L-Ala-O*t*-Bu)-L-Ala-O*t*-Bu (4gb):** A flame-dried 5.0 mL screw-cap vial equipped with a magnetic stirring bar (Sm-Co) was charged with (*S*)-methyl *N*-Boc-4-oxoazetidine-2-carboxylate (**3g**, 114.6 mg, 0.50 mmol), H-L-Ala-O*t*-Bu (290.4 mg, 2.0 mmol), and Ta(OMe)<sub>5</sub> (16.8 mg, 0.050 mmol). After the vial was sealed with screw-cap, the resulting mixture was stirred vigorously at 50 °C for 48 h. The reaction mixture was diluted with CHCl<sub>3</sub> (3.0 mL), transferred onto SiO<sub>2</sub> column by a pipette, and used vial and pipette were washed with CHCl<sub>3</sub> (12 mL). The reaction mixture was purified directly by flash column chromatography (30–100%

AcOEt in hexane) to provide the title compound **4gb** (102.9 mg, 41% yield) as a white solid with >99:1 dr.

$R_f = 0.45$  (50% AcOEt in hexane). M.p. 53–54 °C.  $[\alpha]_D^{24} = -51.2$  ( $c$  1.27, MeOH).  $^1\text{H}$  NMR (400 MHz,  $\text{CDCl}_3$ )  $\delta$  7.47 (br d,  $J = 7.1$  Hz, 1H,  $\text{NH}$ ), 6.57 (br d,  $J = 7.3$  Hz, 1H,  $\text{NH}$ ), 6.11 (br d,  $J = 7.1$ , 1H,  $(\text{CH}_3)_3\text{COCONH}$ ), 4.50–4.30 (m, 2H,  $\text{CHCH}_2$  and  $\text{CHCH}_3$ ), 4.40 (quin,  $J = 7.3$  Hz, 1H,  $\text{CHCH}_3$ ), 2.87 (dd,  $J = 15.1$ , 2.5 Hz, 1H,  $\text{CHCH}_2$ ), 2.57 (dd,  $J = 15.1$ , 6.6 Hz, 1H,  $\text{CHCH}_2$ ), 1.46 (s, 9H,  $\text{CO}_2\text{C}(\text{CH}_3)_3$ ), 1.45 (s, 18H,  $(\text{CH}_3)_3\text{COCONH}$  and  $\text{CO}_2\text{C}(\text{CH}_3)_3$ ), 1.35 (d,  $J = 7.1$  Hz, 3H,  $\text{CHCH}_3$ ), 1.35 (d,  $J = 7.3$  Hz, 3H,  $\text{CHCH}_3$ ).  $^{13}\text{C}$  NMR (100 MHz,  $\text{CDCl}_3$ )  $\delta$  172.1, 171.8, 170.6, 170.4, 155.5, 82.1, 81.8, 80.1, 51.1, 48.9, 48.8, 38.0, 28.3 (3C), 27.9 (6C), 18.1, 18.0. IR (thin film,  $\text{cm}^{-1}$ ) 3305, 2976, 1731, 1684, 1649, 1530, 1454, 1367, 1253, 1146, 1050. HRMS (ESI) calculated for  $\text{C}_{23}\text{H}_{41}\text{N}_3\text{O}_8\text{Na}$   $[\text{M}+\text{Na}]^+$   $m/z$  510.2791, found, 510.2748.

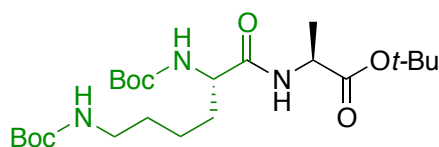

**Boc-L-Lys(Boc)-L-Ala-Ot-Bu (4ha, CAS No. 2374224-03-8)**<sup>6</sup>: A flame-dried 5.0 mL screw-cap vial equipped with a magnetic stirring bar (Sm-Co) was charged with (*S*)-*N,N'*-di-Boc-3-aminoazepan-2-one (**3h**, 164.2 mg, 0.50 mmol) and H-L-Ala-Ot-Bu (145.2 mg, 1.0 mmol). After the vial was sealed with screw-cap, the resulting mixture was stirred vigorously at 50 °C for 24 h. The reaction mixture was diluted with  $\text{CHCl}_3$  (3.0 mL), transferred onto  $\text{SiO}_2$  column by a pipette, and used vial and pipette were washed with  $\text{CHCl}_3$  (12 mL). The reaction mixture was purified directly by flash column chromatography (10–80% AcOEt in hexane) to provide the title compound **4ha** (234.4 mg, 99% yield) as a white solid with >99:1 dr.

$R_f = 0.52$  (50% AcOEt in hexane). M.p. 81–83 °C.  $^1\text{H}$  NMR (400 MHz,  $\text{CDCl}_3$ )  $\delta$  6.64 (br d,  $J = 7.1$  Hz, 1H,  $\text{NH}$ ), 5.19 (br d,  $J = 5.3$  Hz, 1H,  $(\text{CH}_3)_3\text{COCONH}$ ), 4.80–4.60 (m, 1H,  $\text{CHCH}_2\text{CH}_2\text{CH}_2\text{CH}_2\text{NHCO}_2\text{C}(\text{CH}_3)_3$ ), 4.42 (quin,  $J = 7.1$  Hz, 1H,  $\text{CHCH}_3$ ), 4.08 (br td,  $J = 7.6$ , 5.3 Hz, 1H,  $\text{CHCH}_2\text{CH}_2\text{CH}_2\text{CH}_2\text{NHCO}_2\text{C}(\text{CH}_3)_3$ ), 3.20–3.00 (m, 2H,  $\text{CHCH}_2\text{CH}_2\text{CH}_2\text{CH}_2\text{NHCO}_2\text{C}(\text{CH}_3)_3$ ), 1.90–1.75 (m, 1H,  $\text{CHCH}_2\text{CH}_2\text{CH}_2\text{CH}_2\text{NHCO}_2\text{C}(\text{CH}_3)_3$ ), 1.70–1.55 (m, 1H,  $\text{CHCH}_2\text{CH}_2\text{CH}_2\text{CH}_2\text{NHCO}_2\text{C}(\text{CH}_3)_3$ ), 1.60–1.30 (m, 4H,  $\text{CHCH}_2\text{CH}_2\text{CH}_2\text{CH}_2\text{NHCO}_2\text{C}(\text{CH}_3)_3$ ), 1.46 (s, 9H,  $\text{CO}_2\text{C}(\text{CH}_3)_3$ ), 1.44 (s, 18H,  $(\text{CH}_3)_3\text{COCONH}$  and  $\text{CHCH}_2\text{CH}_2\text{CH}_2\text{CH}_2\text{NHCO}_2\text{C}(\text{CH}_3)_3$ ), 1.37 (d,  $J = 7.1$  Hz, 3H,  $\text{CHCH}_3$ ).  $^{13}\text{C}$  NMR (100

MHz, CDCl<sub>3</sub>)  $\delta$  171.9, 171.4, 156.1, 155.7, 81.9, 79.9, 79.0, 54.3, 48.6, 39.9, 32.1, 29.5, 28.4 (3C), 28.3 (3C), 27.9 (3C), 22.5, 18.4. IR (thin film, cm<sup>-1</sup>) 2974, 2938, 1686, 1655, 1509, 1456, 1365, 1246, 1148, 1046, 1018.

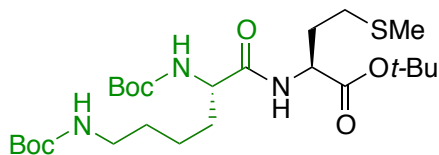

**Boc-L-Lys(Boc)-L-Met-Ot-Bu (4hb):** A flame-dried 5.0 mL screw-cap vial equipped with a magnetic stirring bar (Sm-Co) was charged with (*S*)-*N,N'*-di-Boc-3-aminoazepan-2-one (**3h**, 164.2 mg, 0.50 mmol) and H-L-Met-Ot-Bu (205.3 mg, 1.0 mmol). After the vial was sealed with screw-cap, the resulting mixture was stirred vigorously at 50 °C for 36 h. The reaction mixture was diluted with CHCl<sub>3</sub> (3.0 mL), transferred onto SiO<sub>2</sub> column by a pipette, and used vial and pipette were washed with CHCl<sub>3</sub> (12 mL). The reaction mixture was purified directly by flash column chromatography (10–80% AcOEt in hexane) to provide the title compound **4hb** (258.9 mg, 97% yield) as a white solid with >99:1 dr.

$R_f$  = 0.58 (50% AcOEt in hexane). M.p. 35–36 °C.  $[\alpha]_D^{24}$  = –32.3 (*c* 1.55, MeOH). <sup>1</sup>H NMR (400 MHz, CDCl<sub>3</sub>)  $\delta$  6.75 (br d, *J* = 7.6 Hz, 1H, NH), 5.17 (br d, *J* = 5.5 Hz, 1H, (CH<sub>3</sub>)<sub>3</sub>COCONH), 4.68 (br t, *J* = 6.0 Hz, 1H, CHCH<sub>2</sub>CH<sub>2</sub>CH<sub>2</sub>CH<sub>2</sub>NHCO<sub>2</sub>C(CH<sub>3</sub>)<sub>3</sub>), 4.56 (td, *J* = 7.6, 5.1 Hz, 1H, CHCH<sub>2</sub>CH<sub>2</sub>SCH<sub>3</sub>), 4.06 (br td, *J* = 8.0, 5.5 Hz, 1H, CHCH<sub>2</sub>CH<sub>2</sub>CH<sub>2</sub>CH<sub>2</sub>NHCO<sub>2</sub>C(CH<sub>3</sub>)<sub>3</sub>), 3.11 (br td, *J* = 6.9, 6.0 Hz, 2H, CHCH<sub>2</sub>CH<sub>2</sub>CH<sub>2</sub>CH<sub>2</sub>NHCO<sub>2</sub>C(CH<sub>3</sub>)<sub>3</sub>), 2.60–2.40 (m, 2H, CHCH<sub>2</sub>CH<sub>2</sub>SCH<sub>3</sub>), 2.20–2.05 (m, 1H, CHCH<sub>2</sub>CH<sub>2</sub>SCH<sub>3</sub>), 2.09 (s, 3H, CHCH<sub>2</sub>CH<sub>2</sub>SCH<sub>3</sub>), 2.05–1.75 (m, 2H, CHCH<sub>2</sub>CH<sub>2</sub>CH<sub>2</sub>CH<sub>2</sub>NHCO<sub>2</sub>C(CH<sub>3</sub>)<sub>3</sub> and CHCH<sub>2</sub>CH<sub>2</sub>SCH<sub>3</sub>), 1.70–1.55 (m, 1H, CHCH<sub>2</sub>CH<sub>2</sub>CH<sub>2</sub>CH<sub>2</sub>NHCO<sub>2</sub>C(CH<sub>3</sub>)<sub>3</sub>), 1.60–1.30 (m, 4H, CHCH<sub>2</sub>CH<sub>2</sub>CH<sub>2</sub>CH<sub>2</sub>NHCO<sub>2</sub>C(CH<sub>3</sub>)<sub>3</sub>), 1.47 (s, 9H, CO<sub>2</sub>C(CH<sub>3</sub>)<sub>3</sub>), 1.44 (s, 18H, (CH<sub>3</sub>)<sub>3</sub>COCONH and CHCH<sub>2</sub>CH<sub>2</sub>CH<sub>2</sub>CH<sub>2</sub>NHCO<sub>2</sub>C(CH<sub>3</sub>)<sub>3</sub>). <sup>13</sup>C NMR (100 MHz, CDCl<sub>3</sub>)  $\delta$  171.8, 170.6, 156.1, 155.7, 82.4, 80.0, 79.1, 54.4, 52.1, 39.8, 31.9, 31.8, 29.8, 29.6, 28.4 (3C), 28.3 (3C), 28.0 (3C), 22.5, 15.4. IR (thin film, cm<sup>-1</sup>) 3329, 2977, 2932, 1690, 1661, 1513, 1455, 1365, 1246, 1151, 1044. HRMS (ESI) calculated for C<sub>25</sub>H<sub>47</sub>N<sub>3</sub>O<sub>7</sub>SiNa [M+Na]<sup>+</sup> *m/z* 556.3032, found, 556.3027.



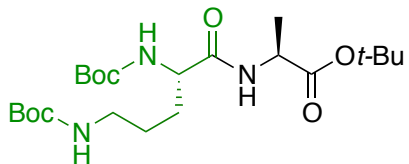

**Boc-L-Orn(Boc)-L-Ala-Ot-Bu (4ia):** A flame-dried 5.0 mL screw-cap vial equipped with a magnetic stirring bar (Sm-Co) was charged with *tert*-butyl (3*S*)-3-[[*(tert*-butoxy)carbonyl]amino}-2-oxopiperidine-1-carboxylate (**3i**, 157.2 mg, 0.50 mmol) and H-L-Ala-Ot-Bu (145.2 mg, 1.0 mmol). After the vial was sealed with screw-cap, the resulting mixture was stirred vigorously at 50 °C for 24 h. The reaction mixture was diluted with CHCl<sub>3</sub> (3.0 mL), transferred onto SiO<sub>2</sub> column by a pipette, and used vial and pipette were washed with CHCl<sub>3</sub> (12 mL). The reaction mixture was purified directly by flash column chromatography (30–80% AcOEt in hexane) to provide the title compound **4ia** (225.1 mg, 98% yield) as a white solid with >99:1 dr.

$R_f$  = 0.50 (50% AcOEt in hexane). M.p. 41–42 °C.  $[\alpha]_D^{25} = -25.0$  ( $c$  1.00, MeOH). <sup>1</sup>H NMR (400 MHz, CDCl<sub>3</sub>)  $\delta$  6.81 (br d,  $J$  = 7.3 Hz, 1H, NH), 5.22 (br d,  $J$  = 6.2 Hz, 1H, (CH<sub>3</sub>)<sub>3</sub>COCONH), 4.78 (br t,  $J$  = 5.7 Hz, 1H, CHCH<sub>2</sub>CH<sub>2</sub>CH<sub>2</sub>NHCO<sub>2</sub>C(CH<sub>3</sub>)<sub>3</sub>), 4.42 (quin,  $J$  = 7.3 Hz, 1H, CHCH<sub>3</sub>), 4.30–4.15 (m, 1H, CHCH<sub>2</sub>CH<sub>2</sub>CH<sub>2</sub>NHCO<sub>2</sub>C(CH<sub>3</sub>)<sub>3</sub>), 3.40–3.20 (m, 1H, CHCH<sub>2</sub>CH<sub>2</sub>CH<sub>2</sub>NHCO<sub>2</sub>C(CH<sub>3</sub>)<sub>3</sub>), 3.20–3.00 (m, 1H, CHCH<sub>2</sub>CH<sub>2</sub>CH<sub>2</sub>NHCO<sub>2</sub>C(CH<sub>3</sub>)<sub>3</sub>), 1.95–1.80 (m, 1H, CHCH<sub>2</sub>CH<sub>2</sub>CH<sub>2</sub>NHCO<sub>2</sub>C(CH<sub>3</sub>)<sub>3</sub>), 1.70–1.50 (m, 3H, CHCH<sub>2</sub>CH<sub>2</sub>CH<sub>2</sub>NHCO<sub>2</sub>C(CH<sub>3</sub>)<sub>3</sub>), 1.45 (s, 9H, CO<sub>2</sub>C(CH<sub>3</sub>)<sub>3</sub>), 1.44 (s, 9H, (CH<sub>3</sub>)<sub>3</sub>COCONH), 1.43 (s, 9H, CHCH<sub>2</sub>CH<sub>2</sub>CH<sub>2</sub>NHCO<sub>2</sub>C(CH<sub>3</sub>)<sub>3</sub>), 1.37 (d,  $J$  = 7.3 Hz, 3H, CHCH<sub>3</sub>). <sup>13</sup>C NMR (100 MHz, CDCl<sub>3</sub>)  $\delta$  171.8, 171.6, 156.4, 155.7, 81.8, 79.8, 79.2, 53.2, 48.6, 39.4, 30.2, 28.4 (3C), 28.3 (3C), 27.9 (3C), 26.1, 18.1. IR (thin film, cm<sup>-1</sup>) 3309, 2978, 2933, 1686, 1659, 1515, 1365, 1247, 1148, 1048, 1015. HRMS (ESI) calculated for C<sub>22</sub>H<sub>41</sub>N<sub>3</sub>O<sub>7</sub>Na [M+Na]<sup>+</sup>  $m/z$  482.2842, found, 482.2842.

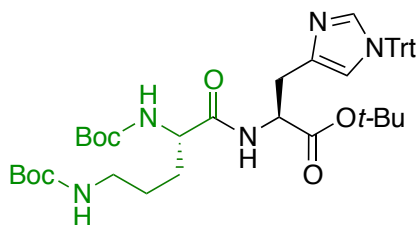

**Boc-L-Orn(Boc)-L-His(Trt)-Ot-Bu (4ib):** A flame-dried 5.0 mL screw-cap vial equipped with a magnetic stirring bar (Sm-Co) was charged with *tert*-butyl (3*S*)-3-[[*(tert*-butoxy)carbonyl]amino]-2-oxopiperidine-1-carboxylate (**3i**, 157.2 mg, 0.50 mmol) and H-L-His-Ot-Bu (680.4 mg, 1.5 mmol). After the vial was sealed with screw-cap, the resulting mixture was stirred vigorously at 50 °C for 60 h. The reaction mixture was diluted with CHCl<sub>3</sub> (3.0 mL), transferred onto SiO<sub>2</sub> column by a pipette, and used vial and pipette were washed with CHCl<sub>3</sub> (12 mL). The reaction mixture was purified directly by flash column chromatography (30–80% AcOEt in hexane) to provide the title compound **4ib** (268.8 mg, 70% yield) as a white solid with >99:1 dr.

$R_f = 0.38$  (50% AcOEt in hexane). M.p. 58–60 °C.  $[\alpha]_D^{25} = -10.0$  ( $c$  1.00, MeOH). <sup>1</sup>H NMR (400 MHz, CDCl<sub>3</sub>)  $\delta$  7.72 (br d,  $J = 7.8$  Hz, 1H, NH), 7.40–7.25 (m, 10H, CHCH<sub>2</sub>CNCHN(C(C<sub>6</sub>H<sub>5</sub>)<sub>3</sub>)CH), 7.20–7.00 (m, 6H, CHCH<sub>2</sub>CNCHN(C(C<sub>6</sub>H<sub>5</sub>)<sub>3</sub>)CH), 6.59 (s, 1H, CHCH<sub>2</sub>CNCHN(C(C<sub>6</sub>H<sub>5</sub>)<sub>3</sub>)CH), 5.44 (br d,  $J = 7.6$  Hz, 1H, (CH<sub>3</sub>)<sub>3</sub>COCONH), 4.82 (br t,  $J = 5.5$  Hz, 1H, CHCH<sub>2</sub>CH<sub>2</sub>CH<sub>2</sub>NHCO<sub>2</sub>C(CH<sub>3</sub>)<sub>3</sub>), 4.64 (dt,  $J = 7.8, 5.4$  Hz, 1H, CHCH<sub>2</sub>CNCHN(C(C<sub>6</sub>H<sub>5</sub>)<sub>3</sub>)CH), 4.30–4.15 (m, 1H, CHCH<sub>2</sub>CH<sub>2</sub>CH<sub>2</sub>NHCO<sub>2</sub>C(CH<sub>3</sub>)<sub>3</sub>), 3.20–3.00 (m, 2H, CHCH<sub>2</sub>CH<sub>2</sub>CH<sub>2</sub>NHCO<sub>2</sub>C(CH<sub>3</sub>)<sub>3</sub>), 2.98 (d,  $J = 5.4$  Hz, 2H, CHCH<sub>2</sub>CNCHN(C(C<sub>6</sub>H<sub>5</sub>)<sub>3</sub>)CH), 1.95–1.80 (m, 1H, CHCH<sub>2</sub>CH<sub>2</sub>CH<sub>2</sub>NHCO<sub>2</sub>C(CH<sub>3</sub>)<sub>3</sub>), 1.70–1.50 (m, 3H, CHCH<sub>2</sub>CH<sub>2</sub>CH<sub>2</sub>NHCO<sub>2</sub>C(CH<sub>3</sub>)<sub>3</sub>), 1.40 (s, 9H, CO<sub>2</sub>C(CH<sub>3</sub>)<sub>3</sub>), 1.40 (s, 9H, (CH<sub>3</sub>)<sub>3</sub>COCONH), 1.34 (s, 9H, CHCH<sub>2</sub>CH<sub>2</sub>CH<sub>2</sub>NHCO<sub>2</sub>C(CH<sub>3</sub>)<sub>3</sub>). <sup>13</sup>C NMR (100 MHz, CDCl<sub>3</sub>)  $\delta$  171.4, 170.0, 156.0, 155.3, 142.2 (3C), 138.6, 136.3, 129.7 (6C), 128.0 (9C), 119.4, 81.5, 79.4, 78.8, 75.2, 53.7, 52.8, 39.9, 30.5, 29.5, 28.4 (3C), 28.3 (3C), 28.0 (3C), 25.4. IR (thin film, cm<sup>-1</sup>) 3278, 2973, 2928, 1711, 1695, 1680, 1494, 1365, 1245, 1153, 1037. HRMS (ESI) calculated for C<sub>23</sub>H<sub>34</sub>N<sub>2</sub>O<sub>7</sub>Na [M+Na]<sup>+</sup>  $m/z$  790.4156, found, 790.4143.

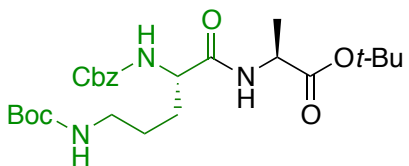

**Cbz-L-Orn(Boc)-L-Ala-Ot-Bu (4j):** A flame-dried 5.0 mL screw-cap vial equipped with a magnetic stirring bar (Sm-Co) was charged with *tert*-butyl (3*S*)-3-[[*(benzyloxy)*carbonyl]amino]-2-oxopiperidine-1-carboxylate (**3j**, 174.2 mg, 0.50 mmol) and H-L-Ala-Ot-Bu (217.8 mg, 1.5 mmol). After the vial was sealed with screw-cap, the resulting

mixture was stirred vigorously at 50 °C for 36 h. The reaction mixture was diluted with CHCl<sub>3</sub> (3.0 mL), transferred onto SiO<sub>2</sub> column by a pipette, and used vial and pipette were washed with CHCl<sub>3</sub> (12 mL). The reaction mixture was purified directly by flash column chromatography (10–80% AcOEt in hexane) to provide the title compound **4j** (234.5 mg, 95% yield) as a white solid with >99:1 dr.

R<sub>f</sub> = 0.43 (50% AcOEt in hexane). M.p. 95–96 °C. [ $\alpha$ ]<sub>D</sub><sup>24</sup> = –49.1 (*c* 1.14, MeOH). <sup>1</sup>H NMR (400 MHz, CDCl<sub>3</sub>)  $\delta$  7.40–7.25 (m, 5H, C<sub>6</sub>H<sub>5</sub>CH<sub>2</sub>OCONH), 6.79 (br d, *J* = 7.1 Hz, 1H, NH), 5.54 (br d, *J* = 7.6 Hz, 1H, C<sub>6</sub>H<sub>5</sub>CH<sub>2</sub>COCONH), 5.10 (s, 2H, C<sub>6</sub>H<sub>5</sub>CH<sub>2</sub>OCONH), 4.75 (br t, *J* = 6.1 Hz, 1H, CHCH<sub>2</sub>CH<sub>2</sub>CH<sub>2</sub>NHCO<sub>2</sub>C(CH<sub>3</sub>)<sub>3</sub>), 4.50–4.30 (m, 1H, CHCH<sub>2</sub>CH<sub>2</sub>CH<sub>2</sub>NHCO<sub>2</sub>C(CH<sub>3</sub>)<sub>3</sub>), 4.42 (quin, *J* = 7.1 Hz, 1H, CHCH<sub>3</sub>), 3.40–3.20 (m, 1H, CHCH<sub>2</sub>CH<sub>2</sub>CH<sub>2</sub>NHCO<sub>2</sub>C(CH<sub>3</sub>)<sub>3</sub>), 3.15–3.00 (m, 1H, CHCH<sub>2</sub>CH<sub>2</sub>CH<sub>2</sub>NHCO<sub>2</sub>C(CH<sub>3</sub>)<sub>3</sub>), 2.00–1.80 (m, 1H, CHCH<sub>2</sub>CH<sub>2</sub>CH<sub>2</sub>NHCO<sub>2</sub>C(CH<sub>3</sub>)<sub>3</sub>), 1.70–1.20 (m, 3H, CHCH<sub>2</sub>CH<sub>2</sub>CH<sub>2</sub>NHCO<sub>2</sub>C(CH<sub>3</sub>)<sub>3</sub>), 1.45 (s, 9H, CO<sub>2</sub>C(CH<sub>3</sub>)<sub>3</sub>), 1.43 (s, 9H, CHCH<sub>2</sub>CH<sub>2</sub>CH<sub>2</sub>NHCO<sub>2</sub>C(CH<sub>3</sub>)<sub>3</sub>), 1.36 (d, *J* = 7.1 Hz, 3H, CHCH<sub>3</sub>). <sup>13</sup>C NMR (100 MHz, CDCl<sub>3</sub>)  $\delta$  171.7, 171.3, 156.5, 156.2, 136.3, 128.5 (2C), 128.1, 128.0 (2C), 81.8, 79.3, 66.9, 53.5, 48.6, 39.2, 30.4, 28.4 (3C), 27.9 (3C), 26.1, 18.0. IR (thin film, cm<sup>–1</sup>) 3316, 2978, 1715, 1683, 1657, 1530, 1453, 1367, 1246, 1151, 1054. HRMS (ESI) calculated for C<sub>25</sub>H<sub>39</sub>N<sub>3</sub>O<sub>7</sub>Na [M+Na]<sup>+</sup> *m/z* 516.2686, found, 516.2653.

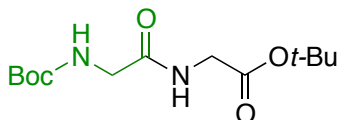

**Boc-Gly-Gly-Ot-Bu (4ka, CAS No. 5845-68-1)**<sup>8</sup>: A flame-dried 5.0 mL screw-cap vial equipped with a magnetic stirring bar (Sm-Co) was charged with Cyclo(-Boc-Gly-Boc-Gly-) (**3k**, 157.2 mg, 0.50 mmol) and H-Gly-Ot-Bu (262.4 mg, 2.0 mmol). After the vial was sealed with screw-cap, the resulting mixture was stirred vigorously at 30 °C for 12 h. The reaction mixture was diluted with CHCl<sub>3</sub> (3.0 mL), transferred onto SiO<sub>2</sub> column by a pipette, and used vial and pipette were washed with CHCl<sub>3</sub> (12 mL). The reaction mixture was purified directly by flash column chromatography (30–80% AcOEt in hexane) to provide the title compound **4ka** (288.0 mg, >99% yield) as a colorless oil.

$R_f = 0.35$  (50% AcOEt in hexane).  $^1\text{H}$  NMR (400 MHz,  $\text{CDCl}_3$ )  $\delta$  6.60 (br t,  $J = 5.3$  Hz, 1H,  $\text{NH}$ ), 5.22 (br t,  $J = 5.7$  Hz, 1H,  $(\text{CH}_3)_3\text{COCONH}$ ), 3.95 (d,  $J = 5.3$  Hz, 2H,  $\text{CH}_2$ ), 3.85 (br d,  $J = 5.7$  Hz, 2H,  $\text{CH}_2$ ), 1.47 (s, 9H,  $\text{CO}_2\text{C}(\text{CH}_3)_3$ ), 1.46 (s, 9H,  $(\text{CH}_3)_3\text{COCONH}$ ).  $^{13}\text{C}$  NMR (100 MHz,  $\text{CDCl}_3$ )  $\delta$  169.5, 168.8, 156.0, 82.4, 80.3, 44.2, 41.9, 28.3 (3C), 28.0 (3C). IR (thin film,  $\text{cm}^{-1}$ ) 3318, 2979, 2933, 1732, 1668, 1515, 1366, 1224, 1151, 1049, 1030.

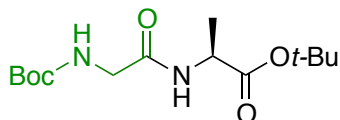

**Boc-Gly-L-Ala-Ot-Bu (4kb, CAS No. 58177-79-0)**<sup>6</sup>: A flame-dried 5.0 mL screw-cap vial equipped with a magnetic stirring bar (Sm-Co) was charged with Cyclo(-Boc-Gly-Boc-Gly-) (**3k**, 157.2 mg, 0.50 mmol) and H-L-Ala-Ot-Bu (290.4 mg, 2.0 mmol). After the vial was sealed with screw-cap, the resulting mixture was stirred vigorously at 30 °C for 12 h. The reaction mixture was diluted with  $\text{CHCl}_3$  (3.0 mL), transferred onto  $\text{SiO}_2$  column by a pipette, and used vial and pipette were washed with  $\text{CHCl}_3$  (12 mL). The reaction mixture was purified directly by flash column chromatography (30–100% AcOEt in hexane) to provide the title compound **4kb** (296.4 mg, 98% yield) as a colorless oil with >99:1 er.

$R_f = 0.37$  (50% AcOEt in hexane).  $^1\text{H}$  NMR (400 MHz,  $\text{CDCl}_3$ )  $\delta$  6.66 (br d,  $J = 7.1$  Hz, 1H,  $\text{NH}$ ), 5.22 (br t,  $J = 5.5$  Hz, 1H,  $(\text{CH}_3)_3\text{COCONH}$ ), 4.47 (quin,  $J = 7.1$  Hz, 1H,  $\text{CHCH}_3$ ), 3.85 (dd,  $J = 17.0, 5.5$  Hz, 1H,  $\text{CH}_2$ ), 3.79 (dd,  $J = 17.0, 5.5$  Hz, 1H,  $\text{CH}_2$ ), 1.47 (s, 9H,  $\text{CO}_2\text{C}(\text{CH}_3)_3$ ), 1.46 (s, 9H,  $(\text{CH}_3)_3\text{COCONH}$ ), 1.38 (d,  $J = 7.1$  Hz, 3H,  $\text{CHCH}_3$ ).  $^{13}\text{C}$  NMR (100 MHz,  $\text{CDCl}_3$ )  $\delta$  172.0, 168.7, 155.9, 82.1, 80.1, 48.6, 44.2, 28.2 (3C), 27.9 (3C), 18.6. IR (thin film,  $\text{cm}^{-1}$ ) 3314, 2979, 2933, 1721, 1664, 1514, 1367, 1246, 1144, 1050, 1030.

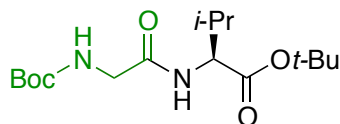

**Boc-Gly-L-Val-Ot-Bu (4kc, CAS No. 1202014-17-2)**<sup>9</sup>: A flame-dried 5.0 mL screw-cap vial equipped with a magnetic stirring bar (Sm-Co) was charged with Cyclo(-Boc-Gly-Boc-Gly-) (**3k**, 157.2 mg, 0.50 mmol) and H-L-Val-Ot-Bu (346.6 mg, 2.0 mmol). After the vial was sealed with screw-cap, the resulting mixture was stirred vigorously at 30 °C for 24 h. The reaction mixture was diluted with  $\text{CHCl}_3$  (3.0 mL), transferred onto  $\text{SiO}_2$  column by a pipette, and used vial and

pipette were washed with CHCl<sub>3</sub> (12 mL). The reaction mixture was purified directly by flash column chromatography (10–80% AcOEt in hexane) to provide the title compound **4kc** (301.0 mg, 91% yield) as a colorless oil with >99:1 er.

$R_f$  = 0.54 (50% AcOEt in hexane). <sup>1</sup>H NMR (400 MHz, CDCl<sub>3</sub>)  $\delta$  6.57 (br d,  $J$  = 8.8 Hz, 1H, NH), 5.18 (br dd,  $J$  = 5.7, 5.5 Hz, 1H, (CH<sub>3</sub>)<sub>3</sub>COCONH), 4.46 (dd,  $J$  = 8.8, 4.5 Hz, 1H, CHCH(CH<sub>3</sub>)<sub>2</sub>), 3.87 (dd,  $J$  = 16.7, 5.5 Hz, 1H, CH<sub>2</sub>), 3.78 (dd,  $J$  = 16.7, 5.7 Hz, 1H, CH<sub>2</sub>), 1.47 (s, 9H, CO<sub>2</sub>C(CH<sub>3</sub>)<sub>3</sub>), 1.46 (s, 9H, (CH<sub>3</sub>)<sub>3</sub>COCONH), 0.94 (d,  $J$  = 6.9 Hz, 3H, CHCH(CH<sub>3</sub>)<sub>2</sub>), 0.90 (d,  $J$  = 6.9 Hz, 3H, CHCH(CH<sub>3</sub>)<sub>2</sub>). <sup>13</sup>C NMR (100 MHz, CDCl<sub>3</sub>)  $\delta$  170.8, 169.2, 156.0, 82.1, 80.2, 57.2, 44.4, 31.4, 28.2 (3C), 28.0 (3C), 18.8, 17.5. IR (thin film, cm<sup>-1</sup>) 3321, 2974, 2934, 1721, 1665, 1514, 1367, 1247, 1142, 1049, 1029.

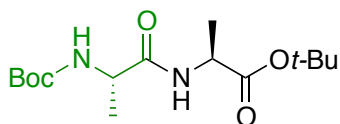

**Boc-L-Ala-L-Ala-Ot-Bu (4l, CAS No. 93836-34-1)**<sup>6</sup>: A flame-dried 5.0 mL screw-cap vial equipped with a magnetic stirring bar (Sm-Co) was charged with Cyclo(-Boc-L-Ala-Boc-L-Ala-) (**3l**, 171.2 mg, 0.50 mmol) and H-L-Ala-Ot-Bu (290.4 mg, 2.0 mmol). After the vial was sealed with screw-cap, the resulting mixture was stirred vigorously at 50 °C for 24 h. The reaction mixture was diluted with CHCl<sub>3</sub> (3.0 mL), transferred onto SiO<sub>2</sub> column by a pipette, and used vial and pipette were washed with CHCl<sub>3</sub> (12 mL). The reaction mixture was purified directly by flash column chromatography (10–80% AcOEt in hexane) to provide the title compound **4l** (94.9 mg, 30% yield) as a colorless oil with >99:1 dr.

$R_f$  = 0.54 (50% AcOEt in hexane). <sup>1</sup>H NMR (400 MHz, CDCl<sub>3</sub>)  $\delta$  6.66 (br d,  $J$  = 7.1 Hz, 1H, NH), 5.20–5.05 (m, 1H, (CH<sub>3</sub>)<sub>3</sub>COCONH), 4.43 (quin,  $J$  = 7.1 Hz, 1H, CHCH<sub>3</sub>), 4.30–4.10 (m, 1H, CHCH<sub>3</sub>), 1.46 (s, 9H, CO<sub>2</sub>C(CH<sub>3</sub>)<sub>3</sub>), 1.45 (s, 9H, (CH<sub>3</sub>)<sub>3</sub>COCONH), 1.37 (d,  $J$  = 7.1 Hz, 3H, CHCHCH<sub>3</sub>), 1.36 (d,  $J$  = 7.1 Hz, 3H, CHCHCH<sub>3</sub>). <sup>13</sup>C NMR (100 MHz, CDCl<sub>3</sub>)  $\delta$  172.0, 171.9, 155.3, 81.9, 79.9, 50.0, 48.6, 28.3 (3C), 27.9 (3C), 18.5 (2C). IR (thin film, cm<sup>-1</sup>) 3310, 2978, 2935, 1718, 1659, 1518, 1453, 1366, 1247, 1146, 1049.

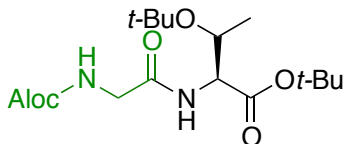

**Aloc-Gly-L-Thr(*t*-Bu)-Ot-Bu (4m):** A flame-dried 5.0 mL screw-cap vial equipped with a magnetic stirring bar (Sm-Co) was charged with Cyclo(-Aloc-Gly-Aloc-Gly-) (**3m**, 141.1 mg, 0.50 mmol) and H-L-Thr(*t*-Bu)-Ot-Bu (462.7 mg, 2.0 mmol). After the vial was sealed with screw-cap, the resulting mixture was stirred vigorously at 30 °C for 24 h. The reaction mixture was diluted with CHCl<sub>3</sub> (3.0 mL), transferred onto SiO<sub>2</sub> column by a pipette, and used vial and pipette were washed with CHCl<sub>3</sub> (12 mL). The reaction mixture was purified directly by flash column chromatography (10–80% AcOEt in hexane) to provide the title compound **4m** (261.5 mg, 91% yield) as a colorless oil with >99:1 dr.

$R_f = 0.38$  (50% AcOEt in hexane).  $[\alpha]_D^{26} = -5.2$  ( $c$  1.36, MeOH). <sup>1</sup>H NMR (400 MHz, CDCl<sub>3</sub>)  $\delta$  6.53 (br d,  $J = 9.2$  Hz, 1H, NH), 5.92 (ddt,  $J = 17.2, 10.3, 5.3$  Hz, 1H, CH<sub>2</sub>CCHCH<sub>2</sub>OCONH), 5.60–5.40 (m, 1H, CH<sub>2</sub>CCHCH<sub>2</sub>OCONH), 5.31 (ddd,  $J = 17.2, 3.2, 1.6$  Hz, 1H, CH<sub>2</sub>CCHCH<sub>2</sub>OCONH), 5.22 (ddd,  $J = 10.3, 2.5, 1.2$  Hz, 1H, CH<sub>2</sub>CCHCH<sub>2</sub>OCONH), 4.62 (dd,  $J = 13.8, 5.3$  Hz, 1H, CH<sub>2</sub>CCHCH<sub>2</sub>OCONH), 4.58 (dd,  $J = 13.8, 5.3$  Hz, 1H, CH<sub>2</sub>CCHCH<sub>2</sub>OCONH), 4.37 (dd,  $J = 9.2, 2.0$  Hz, 1H, CHCH(CH<sub>3</sub>)OC(CH<sub>3</sub>)<sub>3</sub>), 4.20 (qd,  $J = 6.3, 2.0$  Hz, 1H, CHCH(CH<sub>3</sub>)OC(CH<sub>3</sub>)<sub>3</sub>), 3.99 (dd,  $J = 17.2, 5.5$  Hz, 1H, CH<sub>2</sub>), 3.94 (dd,  $J = 17.2, 6.0$  Hz, 1H, CH<sub>2</sub>), 1.46 (s, 9H, CO<sub>2</sub>C(CH<sub>3</sub>)<sub>3</sub>), 1.16 (s, 9H, CHCH(CH<sub>3</sub>)OC(CH<sub>3</sub>)<sub>3</sub>), 1.16 (d,  $J = 6.3$  Hz, 3H, CHCH(CH<sub>3</sub>)OC(CH<sub>3</sub>)<sub>3</sub>). <sup>13</sup>C NMR (100 MHz, CDCl<sub>3</sub>)  $\delta$  169.6, 169.0, 156.2, 132.6, 117.8, 82.1, 73.8, 67.1, 65.9, 58.3, 44.3, 28.6 (3C), 28.0 (3C), 21.0. IR (thin film, cm<sup>-1</sup>) 3326, 2976, 2935, 1726, 1669, 1514, 1366, 1247, 1143, 1081, 990. HRMS (ESI) calculated for C<sub>18</sub>H<sub>32</sub>N<sub>2</sub>O<sub>6</sub>Na [M+Na]<sup>+</sup>  $m/z$  395.2158, found, 395.2175.

## 8. Properties of lactams **5a–k** (Scheme 3)

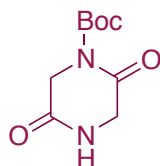

**Cyclo(-Boc-Gly-Gly-) (5a):** A flame-dried 300 mL round-bottom flask equipped with a magnetic stirring bar (Sm-Co) and nitrogen balloon was charged with **3k** (5.0 g, 15.9 mmol) and DCM (160 mL). After TFA (1.22 mL, 15.9 mmol) was added to the mixture at 0 °C, the resulting mixture was stirred under nitrogen atmosphere at room temperature for overnight. Next, the reaction mixture was filtered on filter paper to recover Cyclo(-Gly-Gly-) (544.2 mg, 30% yield) and the filtrate was concentrated in *vacuo* with the aid of a rotary evaporator and water bath. The crude product was then diluted with CHCl<sub>3</sub> (15 mL), transferred onto SiO<sub>2</sub> column by a pipette, and used round-bottom flask and pipette were washed with CHCl<sub>3</sub> (2 x 5 mL). The reaction mixture was purified by flash column chromatography (50–100% AcOEt in hexane → 5% MeOH in CHCl<sub>3</sub>) to provide the title compound **5a** (1.26 g, 37% yield) as a white solid and recover **3k** (1.30 g, 26% yield). The recovered Cyclo(-Gly-Gly-) and **3k** were reused to synthesize **5a**.

R<sub>f</sub> = 0.29 (AcOEt). M.p. >300 °C. <sup>1</sup>H NMR (400 MHz, CDCl<sub>3</sub>) δ 7.55 (br d, *J* = 2.1 Hz, 1H, NH), 4.32 (s, 2H, CH<sub>2</sub>), 4.06 (br d, *J* = 2.1 Hz, 2H, CH<sub>2</sub>), 1.54 (s, 9H, (CH<sub>3</sub>)<sub>3</sub>COCON). <sup>13</sup>C NMR (100 MHz, CDCl<sub>3</sub>) δ 167.2, 164.7, 149.8, 84.9, 47.8, 46.5, 27.8 (3C). IR (thin film, cm<sup>-1</sup>) 3240, 2977, 1736, 1697, 1682, 1447, 1367, 1292, 1212, 1150, 1058. HRMS (ESI) calculated for C<sub>9</sub>H<sub>14</sub>N<sub>2</sub>O<sub>4</sub>Na [M+Na]<sup>+</sup> *m/z* 237.0851, found, 237.0895.

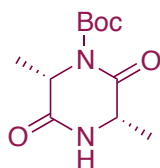

**Cyclo(-Boc-L-Ala-L-Ala-) (5b):** A flame-dried 300 mL round-bottom flask equipped with a magnetic stirring bar (Sm-Co) and nitrogen balloon was charged with **3l** (6.05 g, 17.7 mmol) and DCM (170 mL). After TFA (1.35 mL, 17.7 mmol) was added to the mixture at 0 °C, the resulting mixture was stirred under nitrogen atmosphere at 0 °C for 2 h and at room temperature

for 2.5 h. Next, the reaction mixture concentrated in *vacuo* with the aid of a rotary evaporator and water bath without heating. The crude product was then diluted with CHCl<sub>3</sub> (15 mL), transferred onto SiO<sub>2</sub> column by a pipette, and used round-bottom flask and pipette were washed with CHCl<sub>3</sub> (2 x 5 mL). The reaction mixture was purified by flash column chromatography (50–100% AcOEt in hexane) to provide the title compound **5b** (1.60 g, 37% yield) as a white solid and recover **3l** (3.14 g, 52% yield). The recovered **3l** was reused to synthesize **5b**.

$R_f = 0.46$  (AcOEt). M.p. 140–141 °C.  $[\alpha]_D^{24} = +100.0$  ( $c$  1.08, MeOH). <sup>1</sup>H NMR (400 MHz, CDCl<sub>3</sub>)  $\delta$  7.63 (br d,  $J = 3.2$  Hz, 1H, NH), 4.66 (q,  $J = 7.1$  Hz, 1H, CHCH<sub>3</sub>), 4.21 (qd,  $J = 7.3$ , 3.2 Hz, 1H, CHCH<sub>3</sub>), 1.61 (d,  $J = 7.1$  Hz, 3H, CHCH<sub>3</sub>), 1.58 (d,  $J = 7.3$  Hz, 3H, CHCH<sub>3</sub>), 1.55 (s, 9H, (CH<sub>3</sub>)<sub>3</sub>COCON). <sup>13</sup>C NMR (100 MHz, CDCl<sub>3</sub>)  $\delta$  169.5, 167.8, 150.2, 84.6, 54.8, 52.7, 27.8 (3C), 21.9, 20.9. IR (thin film, cm<sup>-1</sup>) 2941, 1769, 1733, 1715, 1448, 1370, 1289, 1241, 1149, 1135, 1089. HRMS (ESI) calculated for C<sub>11</sub>H<sub>18</sub>N<sub>2</sub>O<sub>4</sub>Na  $[M+Na]^+$   $m/z$  265.1164, found, 265.1199.

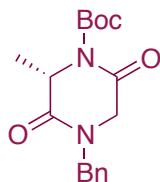

**Cyclo(-Boc-L-Ala-Bn-Gly-) (5c):** A flame-dried 200 mL round-bottom flask equipped with a magnetic stirring bar (Sm-Co) and nitrogen balloon was charged with commercially available Cyclo(-L-Ala-Bn-Gly-) (1.0 g, 4.58 mmol), DMAP (1.12 g, 9.16 mmol), Boc<sub>2</sub>O (2.0 g, 9.16 mmol), and DCM (46 mL). After Et<sub>3</sub>N (0.64 mL, 4.58 mmol) was added to the mixture at 0 °C, the resulting mixture was stirred under nitrogen atmosphere at room temperature for overnight. After completion, the reaction mixture was transferred to a separatory funnel with CHCl<sub>3</sub> (200 mL) and saturated aqueous solution of NH<sub>4</sub>Cl (100 mL) was added. The phases were separated and aqueous layer was extracted with CHCl<sub>3</sub> (2 x 100 mL). The organic phase was washed with water (50 mL) and brine (50 mL), and then dried over MgSO<sub>4</sub>, filtered, concentrated in *vacuo* with the aid of a rotary evaporator and water bath without heating. The crude product was then diluted with CHCl<sub>3</sub> (15 mL), transferred onto SiO<sub>2</sub> column by a pipette, and used round-bottom flask and pipette were washed with CHCl<sub>3</sub> (2 x 5 mL). The crude product was purified by flash column chromatography (10–50% AcOEt in hexane) to provide the title compound **5c** (1.30 g, 89% yield) as a white solid.



$R_f = 0.38$  (30% AcOEt in hexane). M.p. 130–132 °C.  $[\alpha]_D^{25} = +70.4$  ( $c$  1.15, MeOH).  $^1\text{H}$  NMR (400 MHz,  $\text{CDCl}_3$ )  $\delta$  7.40–7.20 (m, 5H,  $\text{C}_6\text{H}_5\text{CH}_2\text{N}$ ), 4.83 (q,  $J = 7.1$  Hz, 1H,  $\text{CHCH}_3$ ), 4.71 (d,  $J = 14.6$  Hz, 1H,  $\text{C}_6\text{H}_5\text{CH}_2\text{N}$ ), 4.50 (d,  $J = 14.6$  Hz, 1H,  $\text{C}_6\text{H}_5\text{CH}_2\text{N}$ ), 3.94 (d,  $J = 18.3$  Hz, 1H,  $\text{CH}_2$ ), 3.85 (d,  $J = 18.3$  Hz, 1H,  $\text{CH}_2$ ), 1.54 (s, 9H,  $(\text{CH}_3)_3\text{COCON}$ ), 1.53 (d,  $J = 7.1$  Hz, 3H,  $\text{CHCH}_2\text{CH}_3$ ).  $^{13}\text{C}$  NMR (100 MHz,  $\text{CDCl}_3$ )  $\delta$  167.3, 164.6, 149.6, 134.9, 129.0 (2C), 128.2 (3C), 84.6, 55.3, 50.2, 49.2, 27.9 (3C), 18.5. IR (thin film,  $\text{cm}^{-1}$ ) 2973, 1735, 1718, 1647, 1494, 1368, 1291, 1256, 1232, 1149, 1100. HRMS (ESI) calculated for  $\text{C}_{17}\text{H}_{22}\text{N}_2\text{O}_4\text{Na}$   $[\text{M}+\text{Na}]^+$   $m/z$  341.1477, found, 341.1526.

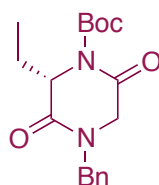

**Cyclo(-Boc-L-Abu-Bn-Gly-) (5d, CAS No. 1932055-28-1):** A flame-dried 200 mL round-bottom flask equipped with a magnetic stirring bar (Sm-Co) and nitrogen balloon was charged with commercially available Cyclo(-L-Abu-Bn-Gly-) (1.0 g, 4.31 mmol), DMAP (1.05 g, 8.62 mmol),  $\text{Boc}_2\text{O}$  (1.88 g, 8.62 mmol), and DCM (43 mL). After  $\text{Et}_3\text{N}$  (0.60 mL, 4.31 mmol) was added to the mixture at 0 °C, the resulting mixture was stirred under nitrogen atmosphere at room temperature for overnight. After completion, the reaction mixture was transferred to a separatory funnel with  $\text{CHCl}_3$  (200 mL) and saturated aqueous solution of  $\text{NH}_4\text{Cl}$  (100 mL) was added. The phases were separated and aqueous layer was extracted with  $\text{CHCl}_3$  (2 x 100 mL). The organic phase was washed with water (50 mL) and brine (50 mL), and then dried over  $\text{MgSO}_4$ , filtered, concentrated in *vacuo* with the aid of a rotary evaporator and water bath without heating. The crude product was then diluted with  $\text{CHCl}_3$  (15 mL), transferred onto  $\text{SiO}_2$  column by a pipette, and used round-bottom flask and pipette were washed with  $\text{CHCl}_3$  (2 x 5 mL). The crude product was purified by flash column chromatography (10–80% AcOEt in hexane) to provide the title compound **5d** (1.29 g, 90% yield) as a white solid.

$R_f = 0.36$  (30% AcOEt in hexane). M.p. 109–110 °C.  $^1\text{H}$  NMR (400 MHz,  $\text{CDCl}_3$ )  $\delta$  7.40–7.20 (m, 5H,  $\text{C}_6\text{H}_5\text{CH}_2\text{N}$ ), 4.81 (d,  $J = 14.4$  Hz, 1H,  $\text{C}_6\text{H}_5\text{CH}_2\text{N}$ ), 4.75 (t,  $J = 6.9$  Hz, 1H,  $\text{CHCH}_2\text{CH}_3$ ), 4.36 (d,  $J = 14.4$  Hz, 1H,  $\text{C}_6\text{H}_5\text{CH}_2\text{N}$ ), 3.95 (d,  $J = 18.3$  Hz, 1H,  $\text{CH}_2$ ), 3.85 (d,  $J = 18.3$  Hz, 1H,  $\text{CH}_2$ ), 1.90 (qd,  $J = 7.6, 6.9$  Hz, 2H,  $\text{CHCH}_2\text{CH}_3$ ), 1.54 (s, 9H,  $(\text{CH}_3)_3\text{COCON}$ ), 1.03 (t,  $J = 7.6$

Hz, 3H, CHCH<sub>2</sub>CH<sub>3</sub>). <sup>13</sup>C NMR (100 MHz, CDCl<sub>3</sub>) δ 166.4, 164.9, 149.8, 135.0, 129.0 (2C), 128.3 (2C), 128.2, 84.6, 60.2, 50.4, 49.2, 27.8 (3C), 26.6, 10.0. IR (thin film, cm<sup>-1</sup>) 2973, 2935, 1778, 1668, 1493, 1391, 1296, 1247, 1234, 1146, 1109.

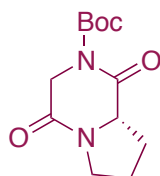

**Cyclo(-Boc-Gly-L-Pro-) (5e, CAS No. 1174732-58-1)<sup>10</sup>:** Cyclo(-Boc-Gly-L-Pro-) was prepared from commercially available Cyclo(-Gly-L-Pro-) (BLD Pharmatech Ltd., BD173941), Boc<sub>2</sub>O (Tokyo Chemical Industry Co., Ltd., D1547), DMAP (FUJIFILM Wako Pure Chemical Co., 042-19212), and triethylamine (FUJIFILM Wako Pure Chemical Co., 202-02646) according to the literature method.<sup>10</sup>

R<sub>f</sub> = 0.50 (AcOEt). M.p. 104–105 °C. <sup>1</sup>H NMR (400 MHz, CDCl<sub>3</sub>) δ 4.67 (d, *J* = 16.5 Hz, 1H, CH<sub>2</sub>), 4.17 (t, *J* = 8.0 Hz, 1H, CHCH<sub>2</sub>CH<sub>2</sub>CH<sub>2</sub>), 4.10 (dd, *J* = 16.5, 0.7 Hz, 1H, CH<sub>2</sub>), 3.58 (dd, *J* = 8.1, 5.9 Hz, 2H, CHCH<sub>2</sub>CH<sub>2</sub>CH<sub>2</sub>), 2.45–2.20 (m, 2H, CHCH<sub>2</sub>CH<sub>2</sub>CH<sub>2</sub>), 2.10–1.85 (m, 2H, CHCH<sub>2</sub>CH<sub>2</sub>CH<sub>2</sub>), 1.54 (s, 9H, (CH<sub>3</sub>)<sub>3</sub>COCON). <sup>13</sup>C NMR (100 MHz, CDCl<sub>3</sub>) δ 167.4, 163.2, 150.0, 84.5, 60.3, 49.7, 45.1, 28.0, 27.8 (3C), 23.1. IR (thin film, cm<sup>-1</sup>) 2985, 2880, 1742, 1714, 1664, 1448, 1360, 1295, 1255, 1195, 1143.

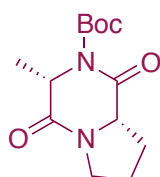

**Cyclo(-Boc-L-Ala-L-Pro-) (5f):** A flame-dried 50 mL screw-cap vial equipped with a magnetic stirring bar (Sm-Co) was charged with commercially available Cyclo(-L-Ala-L-Pro-) (500 mg, 2.97 mmol), DMAP (72.6 mg, 0.60 mmol), Boc<sub>2</sub>O (1.30 g, 5.95 mmol), and DCM (30 mL), and Et<sub>3</sub>N (0.41 mL, 2.97 mmol). After the vial was sealed with screw-cap, the resulting mixture was stirred vigorously at 0 °C to room temperature for 2 h. After completion, the reaction mixture was transferred to a separatory funnel with CHCl<sub>3</sub> (200 mL) and saturated aqueous solution of NH<sub>4</sub>Cl (100 mL) was added. The phases were separated and aqueous layer was extracted with CHCl<sub>3</sub> (2 x 100 mL). The organic phase was washed with water (50 mL) and brine (50 mL), and

then dried over MgSO<sub>4</sub>, filtered, concentrated in *vacuo* with the aid of a rotary evaporator and water bath without heating. The crude product was then diluted with CHCl<sub>3</sub> (15 mL), transferred onto SiO<sub>2</sub> column by a pipette, and used round-bottom flask and pipette were washed with CHCl<sub>3</sub> (2 x 5 mL). The crude product was purified by flash column chromatography (50–100% AcOEt in hexane) to provide the title compound **5f** (256.9 mg, 32% yield) as a white solid.

$R_f$  = 0.59 (AcOEt). M.p. 93–95 °C.  $[\alpha]_D^{24}$  = –2.6 (*c* 1.14, MeOH). <sup>1</sup>H NMR (400 MHz, CDCl<sub>3</sub>)  $\delta$  4.50 (q, *J* = 6.6 Hz, 1H, CHCH<sub>3</sub>), 4.15 (dd, *J* = 9.2, 6.6 Hz, 1H, CHCH<sub>2</sub>CH<sub>2</sub>CH<sub>2</sub>), 3.73 (dt, *J* = 11.9, 8.1 Hz, 1H, CHCH<sub>2</sub>CH<sub>2</sub>CH<sub>2</sub>), 3.51 (ddd, *J* = 11.9, 9.0, 3.2 Hz, 1H, CHCH<sub>2</sub>CH<sub>2</sub>CH<sub>2</sub>), 2.50–2.30 (m, 1H, CHCH<sub>2</sub>CH<sub>2</sub>CH<sub>2</sub>), 2.20–1.80 (m, 3H, CHCH<sub>2</sub>CH<sub>2</sub>CH<sub>2</sub>), 1.57 (d, *J* = 6.6 Hz, 3H, CHCHH<sub>3</sub>), 1.55 (s, 9H, (CH<sub>3</sub>)<sub>3</sub>COCON). <sup>13</sup>C NMR (100 MHz, CDCl<sub>3</sub>)  $\delta$  167.6, 164.9, 151.2, 84.9, 59.7, 55.2, 45.5, 28.9, 27.7 (3C), 22.1, 17.1. IR (thin film, cm<sup>–1</sup>) 2992, 2950, 1738, 1698, 1651, 1468, 1367, 1325, 1272, 1248, 1153. HRMS (ESI) calculated for C<sub>13</sub>H<sub>20</sub>N<sub>2</sub>O<sub>4</sub>Na [M+Na]<sup>+</sup> *m/z* 291.1321, found, 291.1365.

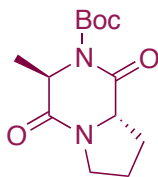

**Cyclo(-Boc-D-Ala-L-Pro-) (5g):** A flame-dried 50 mL screw-cap vial equipped with a magnetic stirring bar (Sm-Co) was charged with commercially available Cyclo(-D-Ala-L-Pro-) (500 mg, 2.97 mmol), DMAP (72.6 mg, 0.60 mmol), Boc<sub>2</sub>O (1.30 g, 5.95 mmol), and CHCl<sub>3</sub>–DMF (30:1, 31 mL), and Et<sub>3</sub>N (0.41 mL, 2.97 mmol). After the vial was sealed with screw-cap, the resulting mixture was stirred vigorously at room temperature for overnight. After completion, the reaction mixture was transferred to a separatory funnel with CHCl<sub>3</sub> (200 mL) and saturated aqueous solution of NH<sub>4</sub>Cl (100 mL) was added. The phases were separated and aqueous layer was extracted with CHCl<sub>3</sub> (2 x 100 mL). The organic phase was washed with water (50 mL) and brine (50 mL), and then dried over MgSO<sub>4</sub>, filtered, concentrated in *vacuo* with the aid of a rotary evaporator and water bath without heating. The crude product was then diluted with CHCl<sub>3</sub> (15 mL), transferred onto SiO<sub>2</sub> column by a pipette, and used round-bottom flask and pipette were washed with CHCl<sub>3</sub> (2 x 5 mL). The crude product was purified by flash column

chromatography (50–100% AcOEt in hexane) to provide the title compound **5g** (524.7 mg, 66% yield) as a white solid.

$R_f = 0.54$  (AcOEt). M.p. 112–113 °C.  $[\alpha]_D^{24} = -105.4$  ( $c$  1.30, MeOH).  $^1\text{H}$  NMR (400 MHz,  $\text{CDCl}_3$ )  $\delta$  4.79 (q,  $J = 7.3$  Hz, 1H,  $\text{CHCH}_3$ ), 4.19 (dd,  $J = 9.4, 7.1$  Hz, 1H,  $\text{CHCH}_2\text{CH}_2\text{CH}_2$ ), 3.70–3.50 (m, 2H,  $\text{CHCH}_2\text{CH}_2\text{CH}_2$ ), 2.50–1.85 (m, 4H,  $\text{CHCH}_2\text{CH}_2\text{CH}_2$ ), 1.54 (d,  $J = 7.3$  Hz, 3H,  $\text{CHCH}_3$ ), 1.54 (s, 9H,  $(\text{CH}_3)_3\text{COCON}$ ).  $^{13}\text{C}$  NMR (100 MHz,  $\text{CDCl}_3$ )  $\delta$  167.4, 166.1, 150.0, 84.4, 59.3, 57.3, 45.5, 29.0, 27.9 (3C), 22.6, 17.2. IR (thin film,  $\text{cm}^{-1}$ ) 2981, 2888, 1776, 1728, 1667, 1459, 1384, 1287, 1250, 1222, 1148. HRMS (ESI) calculated for  $\text{C}_{13}\text{H}_{20}\text{N}_2\text{O}_4\text{Na}$   $[\text{M}+\text{Na}]^+$   $m/z$  291.1321, found, 291.1302.

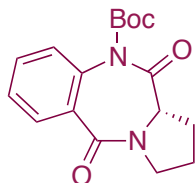

**Cyclo(-Boc-Abz-L-Pro-) (5h):** A flame-dried 50 mL screw-cap vial equipped with a magnetic stirring bar (Sm-Co) was charged with commercially available Cyclo(-Abz-L-Pro-) (1.0 g, 4.62 mmol), DMAP (113.0 mg, 0.93 mmol),  $\text{Boc}_2\text{O}$  (2.02 g, 9.25 mmol), and DCM (46 mL), and  $\text{Et}_3\text{N}$  (0.64 mL, 4.62 mmol). After the vial was sealed with screw-cap, the resulting mixture was stirred vigorously at 0 °C for 1.5 h. After completion, the reaction mixture was transferred to a separatory funnel with  $\text{CHCl}_3$  (200 mL) and saturated aqueous solution of  $\text{NH}_4\text{Cl}$  (100 mL) was added. The phases were separated and aqueous layer was extracted with  $\text{CHCl}_3$  (2 x 100 mL). The organic phase was washed with water (50 mL) and brine (50 mL), and then dried over  $\text{MgSO}_4$ , filtered, concentrated in *vacuo* with the aid of a rotary evaporator and water bath without heating. The crude product was then diluted with  $\text{CHCl}_3$  (15 mL), transferred onto  $\text{SiO}_2$  column by a pipette, and used round-bottom flask and pipette were washed with  $\text{CHCl}_3$  (2 x 5 mL). The crude product was purified by flash column chromatography (50–100% AcOEt in hexane) to provide the title compound **5h** (1.43 g, 98% yield) as a white solid.

$R_f = 0.60$  (AcOEt). M.p. 167–168 °C.  $[\alpha]_D^{25} = -17.0$  ( $c$  1.06, MeOH).  $^1\text{H}$  NMR (400 MHz,  $\text{CDCl}_3$ )  $\delta$  7.92 (dd,  $J = 7.8, 1.6$  Hz, 1H,  $\text{CCHCHCHCHC}$ ), 7.50 (ddd,  $J = 8.0, 7.3, 1.6$  Hz, 1H,  $\text{CCHCHCHCHC}$ ), 7.41 (ddd,  $J = 7.8, 7.3, 1.0$  Hz, 1H,  $\text{CCHCHCHCHC}$ ), 7.23 (dd,  $J = 8.0, 1.0$  Hz, 1H,  $\text{CCHCHCHCHC}$ ), 4.10–4.00 (m, 1H,  $\text{CHCH}_2\text{CH}_2\text{CH}_2$ ), 3.85 (ddd,  $J = 11.7, 8.6, 3.0$  Hz,

<sup>1</sup>H, CHCH<sub>2</sub>CH<sub>2</sub>CH<sub>2</sub>), 3.56 (ddd, *J* = 11.7, 10.1, 6.9 Hz, 1H, CHCH<sub>2</sub>CH<sub>2</sub>CH<sub>2</sub>), 2.80–2.65 (m, 1H, CHCH<sub>2</sub>CH<sub>2</sub>CH<sub>2</sub>), 2.20–1.90 (m, 3H, CHCH<sub>2</sub>CH<sub>2</sub>CH<sub>2</sub>), 1.46 (s, 9H, (CH<sub>3</sub>)<sub>3</sub>COCON). <sup>13</sup>C NMR (100 MHz, CDCl<sub>3</sub>) δ 169.2, 165.0, 150.7, 135.4, 131.2, 131.1, 129.8, 127.5, 126.2, 84.8, 58.9, 46.7, 27.6 (3C), 26.4, 23.6. IR (thin film, cm<sup>-1</sup>) 2980, 2927, 1776, 1634, 1600, 1454, 1417, 1369, 1230, 1140, 1108. HRMS (ESI) calculated for C<sub>17</sub>H<sub>20</sub>N<sub>2</sub>O<sub>4</sub>Na [M+Na]<sup>+</sup> *m/z* 339.1321, found, 339.1352.

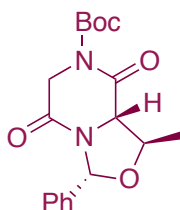

**Cyclo(-Boc-Gly-L-Thr(ψ<sup>Ph,H</sup>pro)-) (5i):** A flame-dried 50 mL screw-cap vial equipped with a magnetic stirring bar (Sm-Co) was charged with commercially available Cyclo(-Gly-L-Thr(ψ<sup>Ph,H</sup>pro)-) (500 mg, 2.03 mmol), DMAP (744.2 mg, 6.09 mmol), Boc<sub>2</sub>O (1.33 g, 6.09 mmol), and DCM (20 mL), and Et<sub>3</sub>N (0.28 mL, 2.03 mmol). After the vial was sealed with screw-cap, the resulting mixture was stirred vigorously at room temperature for overnight. After completion, the reaction mixture was transferred to a separatory funnel with CHCl<sub>3</sub> (200 mL) and saturated aqueous solution of NH<sub>4</sub>Cl (100 mL) was added. The phases were separated and aqueous layer was extracted with CHCl<sub>3</sub> (2 x 100 mL). The organic phase was washed with water (50 mL) and brine (50 mL), and then dried over MgSO<sub>4</sub>, filtered, concentrated in *vacuo* with the aid of a rotary evaporator and water bath without heating. The crude product was then diluted with CHCl<sub>3</sub> (15 mL), transferred onto SiO<sub>2</sub> column by a pipette, and used round-bottom flask and pipette were washed with CHCl<sub>3</sub> (2 x 5 mL). The crude product was purified by flash column chromatography (10–50% AcOEt in hexane) to provide the title compound **5i** (618.8 mg, 88% yield) as a white solid.

*R*<sub>f</sub> = 0.83 (AcOEt). M.p. 147–148 °C. [α]<sub>D</sub><sup>24</sup> = –37.2 (*c* 1.05, MeOH). <sup>1</sup>H NMR (400 MHz, CDCl<sub>3</sub>) δ 7.45–7.30 (m, 5H, CHCH(CH<sub>3</sub>)OCHC<sub>6</sub>H<sub>5</sub>), 6.31 (s, 1H, CHCH(CH<sub>3</sub>)OCHC<sub>6</sub>H<sub>5</sub>), 4.73 (d, *J* = 17.1 Hz, 1H, CH<sub>2</sub>), 4.50 (dq, *J* = 8.9, 6.0 Hz, 1H, CHCH(CH<sub>3</sub>)OCHC<sub>6</sub>H<sub>5</sub>), 4.17 (d, *J* = 17.1 Hz, 1H, CH<sub>2</sub>), 3.99 (d, *J* = 8.9 Hz, 1H, CHCH(CH<sub>3</sub>)OCHC<sub>6</sub>H<sub>5</sub>), 1.56 (s, 9H, (CH<sub>3</sub>)<sub>3</sub>COCON), 1.56 (d, *J* = 6.0 Hz, 3H, CHCH(CH<sub>3</sub>)OCHC<sub>6</sub>H<sub>5</sub>). <sup>13</sup>C NMR (100 MHz, CDCl<sub>3</sub>) δ 165.2, 162.0, 149.7, 136.8, 129.3, 128.7 (2C), 126.2 (2C), 88.5, 85.2, 74.0, 63.7, 50.2, 27.9

(3C), 18.1. IR (thin film,  $\text{cm}^{-1}$ ) 2985, 2932, 1764, 1683, 1428, 1368, 1285, 1237, 1145, 1127, 1011. HRMS (ESI) calculated for  $\text{C}_{18}\text{H}_{22}\text{N}_2\text{O}_5\text{Na}$   $[\text{M}+\text{Na}]^+$   $m/z$  369.1426, found, 369.1459.

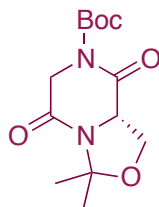

**Cyclo(-Boc-Gly-L-Ser( $\psi^{\text{Me,Me}}$ pro)-) (5j):** A flame-dried 500 mL round-bottom flask equipped with a magnetic stirring bar (Sm-Co) and nitrogen balloon was charged with commercially available Fmoc-Gly-L-Ser( $\psi^{\text{Me,Me}}$ pro)-OH (10.0 g, 23.56 mmol), MeOH (9.53 mL, 235.60 mmol), WSC $\cdot$ HCl (5.87 g, 30.63 mmol), HOBt (4.14 g, 30.63 mmol), and  $\text{CHCl}_3$  (200 mL). After  $i\text{Pr}_2\text{NEt}$  (6.16 mL, 35.34 mmol) was added to the mixture at  $-5^\circ\text{C}$ , the resulting mixture was stirred under nitrogen atmosphere at  $-5^\circ\text{C}$  for overnight. After completion, the reaction mixture was transferred to a separatory funnel with  $\text{CHCl}_3$  (300 mL) and saturated aqueous solution of  $\text{NH}_4\text{Cl}$  (100 mL) was added. The phases were separated and aqueous layer was extracted with  $\text{CHCl}_3$  (2 x 200 mL). The organic phase was washed with water (50 mL) and brine (50 mL), and then dried over  $\text{MgSO}_4$ , filtered, concentrated in *vacuo* with the aid of a rotary evaporator and water bath without heating. The crude product was then diluted with  $\text{CHCl}_3$  (30 mL), transferred onto  $\text{SiO}_2$  column by a pipette, and used round-bottom flask and pipette were washed with  $\text{CHCl}_3$  (2 x 10 mL). The crude product was purified by flash column chromatography (30–100% AcOEt in hexane) to provide Fmoc-Gly-L-Ser( $\psi^{\text{Me,Me}}$ pro)-OMe (9.88 g, 95% yield) as a white solid. A flame-dried 300 mL round-bottom flask equipped with a magnetic stirring bar (Sm-Co) and nitrogen balloon was charged with Fmoc-Gly-L-Ser( $\psi^{\text{Me,Me}}$ pro)-OMe (6.37 g, 14.5 mmol) and DCM (116 mL). After piperidine (29 mL) was added to the mixture at  $0^\circ\text{C}$ , the resulting mixture was stirred under nitrogen atmosphere at room temperature for 2 h. After completion, the reaction mixture was concentrated in *vacuo* with the aid of a rotary evaporator and water bath without heating. After completion, the reaction mixture was transferred to a separatory funnel with  $\text{CHCl}_3$  (200 mL) and saturated aqueous solution of  $\text{NH}_4\text{Cl}$  (200 mL) was added. The phases were separated and aqueous layer was extracted with  $\text{CHCl}_3$  (3 x 200 mL). The organic phase was dried over  $\text{MgSO}_4$ , filtered, concentrated in *vacuo* with the aid of a rotary evaporator and water bath without heating. The

crude product was then diluted with CHCl<sub>3</sub> (30 mL), transferred onto SiO<sub>2</sub> column by a pipette, and used round-bottom flask and pipette were washed with CHCl<sub>3</sub> (2 x 10 mL). The crude product was purified by flash column chromatography (1–5% MeOH in CHCl<sub>3</sub>) to provide Cyclo(-Gly-L-Ser( $\psi^{\text{Me,Me}}$ pro)-) (2.41 g, 90% yield) as a white solid. A flame-dried 300 mL round-bottom flask equipped with a magnetic stirring bar (Sm-Co) and nitrogen balloon was charged with Cyclo(-Gly-L-Ser( $\psi^{\text{Me,Me}}$ pro)-) (2.12 g, 11.51 mmol), DMAP (281.2 mg, 2.30 mmol), Boc<sub>2</sub>O (5.02 g, 23.02 mmol), DCM (115 mL), and Et<sub>3</sub>N (1.6 mL, 11.51 mmol). After the vial was sealed with screw-cap, the resulting mixture was stirred vigorously at 0 °C to room temperature for overnight. After completion, the reaction mixture was concentrated in *vacuo* with the aid of a rotary evaporator and water bath without heating. The crude product was then diluted with CHCl<sub>3</sub> (30 mL), transferred onto SiO<sub>2</sub> column by a pipette, and used round-bottom flask and pipette were washed with CHCl<sub>3</sub> (2 x 10 mL). The crude product was purified directly by flash column chromatography (30–100% AcOEt in hexane) to provide the title compound **5j** (2.95 g, 90% yield) as a white solid.

R<sub>f</sub> = 0.54 (50% AcOEt in hexane). M.p. 114–115 °C. [ $\alpha$ ]<sub>D</sub><sup>25</sup> = –122.4 (*c* 1.07, MeOH). <sup>1</sup>H NMR (400 MHz, CDCl<sub>3</sub>)  $\delta$  4.61 (d, *J* = 16.5 Hz, 1H, CH<sub>2</sub>), 4.50–4.30 (m, 2H, CHCH<sub>2</sub>OC(CH<sub>3</sub>)<sub>2</sub>), 4.20–4.10 (m, 1H, CHCH<sub>2</sub>OC(CH<sub>3</sub>)<sub>2</sub>), 4.11 (d, *J* = 16.5 Hz, 1H, CH<sub>2</sub>), 1.65 (s, 3H, CHCH<sub>2</sub>OC(CH<sub>3</sub>)<sub>2</sub>), 1.60 (s, 3H, CHCH<sub>2</sub>OC(CH<sub>3</sub>)<sub>2</sub>), 1.55 (s, 9H, (CH<sub>3</sub>)<sub>3</sub>COCON). <sup>13</sup>C NMR (100 MHz, CDCl<sub>3</sub>)  $\delta$  165.6, 160.8, 149.6, 95.9, 85.0, 65.2, 58.3, 50.3, 27.8 (3C), 25.2, 23.5. IR (thin film, cm<sup>–1</sup>) 2980, 1760, 1674, 1430, 1384, 1366, 1290, 1237, 1149, 1098, 1015. HRMS (ESI) calculated for C<sub>13</sub>H<sub>20</sub>N<sub>2</sub>O<sub>5</sub>Na [M+Na]<sup>+</sup> *m/z* 307.1270, found, 307.1223.

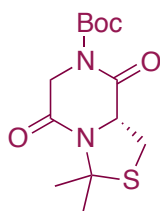

**Cyclo(-Boc-Gly-L-Cys( $\psi^{\text{Me,Me}}$ pro)-) (5k):** A flame-dried 300 mL round-bottom flask equipped with a magnetic stirring bar (Sm-Co) and nitrogen balloon was charged with commercially available Fmoc-Gly-L-Cys( $\psi^{\text{Me,Me}}$ pro)-OH (5.0 g, 11.35 mmol), MeOH (4.59 mL, 113.51 mmol), WSC•HCl (2.83 g, 14.76 mmol), HOBt (1.99 g, 14.76 mmol), and CHCl<sub>3</sub> (110 mL). After Et<sub>3</sub>N (2.37 mL, 17.03 mmol) was added to the mixture at –5 °C, the resulting mixture was stirred

under nitrogen atmosphere at -5 °C for overnight. After completion, the reaction mixture was transferred to a separatory funnel with CHCl<sub>3</sub> (200 mL) and saturated aqueous solution of NH<sub>4</sub>Cl (100 mL) was added. The phases were separated and aqueous layer was extracted with CHCl<sub>3</sub> (2 x 100 mL). The organic phase was washed with water (50 mL) and brine (50 mL), and then dried over MgSO<sub>4</sub>, filtered, concentrated in *vacuo* with the aid of a rotary evaporator and water bath without heating. The crude product was then diluted with CHCl<sub>3</sub> (15 mL), transferred onto SiO<sub>2</sub> column by a pipette, and used round-bottom flask and pipette were washed with CHCl<sub>3</sub> (2 x 5 mL). The crude product was purified by flash column chromatography (50% AcOEt in hexane) to provide Fmoc-Gly-L-Cys( $\psi^{\text{Me,Me}}$ pro)-OMe (4.73 g, 92% yield) as a white solid. A flame-dried 200 mL round-bottom flask equipped with a magnetic stirring bar (Sm-Co) and nitrogen balloon was charged with Fmoc-Gly-L-Cys( $\psi^{\text{Me,Me}}$ pro)-OMe (2.50 g, 5.50 mmol) and DCM (55 mL). After piperidine (5.5 mL, 55.68 mmol) was added to the mixture at 0 °C, the resulting mixture was stirred under nitrogen atmosphere at room temperature for 2 h. After completion, the reaction mixture was concentrated in *vacuo* with the aid of a rotary evaporator and water bath without heating. The crude product was then diluted with CHCl<sub>3</sub> (15 mL), transferred onto SiO<sub>2</sub> column by a pipette, and used round-bottom flask and pipette were washed with CHCl<sub>3</sub> (2 x 5 mL). The crude product was purified by flash column chromatography (1–7.5% MeOH in CHCl<sub>3</sub>) to provide Cyclo(-Gly-L-Cys( $\psi^{\text{Me,Me}}$ pro)-) (1.09 g, 99% yield) as a white solid. A flame-dried 50 mL screw-cap vial equipped with a magnetic stirring bar (Sm-Co) was charged with commercially available Cyclo(-Gly-L-Cys( $\psi^{\text{Me,Me}}$ pro)-) (500 mg, 2.50 mmol), DMAP (61.0 mg, 0.50 mmol), Boc<sub>2</sub>O (1.90 g, 4.99 mmol), DCM (25 mL), and Et<sub>3</sub>N (0.28 mL, 2.50 mmol). After the vial was sealed with screw-cap, the resulting mixture was stirred vigorously at 0 °C to room temperature for overnight. After completion, the reaction mixture was concentrated in *vacuo* with the aid of a rotary evaporator and water bath without heating. The crude product was then diluted with CHCl<sub>3</sub> (15 mL), transferred onto SiO<sub>2</sub> column by a pipette, and used round-bottom flask and pipette were washed with CHCl<sub>3</sub> (2 x 5 mL). The crude product was purified by flash column chromatography (30–80% AcOEt in hexane) to provide the title compound **5k** (666.6 mg, 89% yield) as a white solid.

R<sub>f</sub> = 0.52 (50% AcOEt in hexane). M.p. 154–155 °C. [ $\alpha$ ]<sub>D</sub><sup>20</sup> = -55.9 (*c* 1.11, MeOH). <sup>1</sup>H NMR (400 MHz, CDCl<sub>3</sub>)  $\delta$  4.60 (dd, *J* = 9.5, 6.3 Hz, 1H, CHCH<sub>2</sub>SC(CH<sub>3</sub>)<sub>2</sub>), 4.59 (d, *J* = 16.5 Hz, 1H, CH<sub>2</sub>), 4.08 (d, *J* = 16.5 Hz, 1H, CH<sub>2</sub>), 4.11 (d, *J* = 16.5 Hz, 1H, CH<sub>2</sub>), 3.43 (d, *J* = 12.5, 9.5 Hz,



$^1\text{H}$ ,  $\text{CHCH}_2\text{SC}(\text{CH}_3)_2$ , 3.31 (d,  $J = 12.5, 6.3$  Hz,  $^1\text{H}$ ,  $\text{CHCH}_2\text{SC}(\text{CH}_3)_2$ ), 1.90 (s, 3H,  $\text{CHCH}_2\text{SC}(\text{CH}_3)_2$ ), 1.84 (s, 3H,  $\text{CHCH}_2\text{SC}(\text{CH}_3)_2$ ), 1.55 (s, 9H,  $(\text{CH}_3)_3\text{COCON}$ ).  $^{13}\text{C}$  NMR (100 MHz,  $\text{CDCl}_3$ )  $\delta$  165.9, 162.0, 149.7, 85.0, 73.2, 65.4, 50.2, 30.1, 29.2, 27.9, 27.8 (3C). IR (thin film,  $\text{cm}^{-1}$ ) 2980, 1768, 1723, 1667, 1415, 1370, 1312, 1282, 1236, 1143, 1071. HRMS (ESI) calculated for  $\text{C}_{13}\text{H}_{20}\text{N}_2\text{O}_4\text{SNa}$   $[\text{M}+\text{Na}]^+$   $m/z$  323.1042, found, 323.1049.

## 9. Properties of peptides 6a–k (Scheme 3)

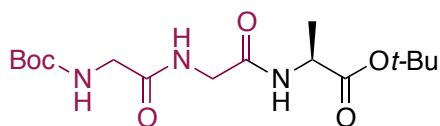

**Boc-Gly-Gly-L-Ala-Ot-Bu (6aa):** A flame-dried 5.0 mL screw-cap vial equipped with a magnetic stirring bar (Sm-Co) was charged with Cyclo(-Boc-Gly-Gly-) (**5a**, 107.1 mg, 0.50 mmol) and H-L-Ala-Ot-Bu (145.2 mg, 1.0 mmol). After the vial was sealed with screw-cap, the resulting mixture was stirred vigorously at 30 °C for 12 h. The reaction mixture was diluted with CHCl<sub>3</sub> (3.0 mL), transferred onto SiO<sub>2</sub> column by a pipette, and used vial and pipette were washed with CHCl<sub>3</sub> (12 mL). The reaction mixture was purified directly by flash column chromatography (AcOEt → 10% MeOH in CHCl<sub>3</sub>) to provide the title compound **6aa** (163.5 mg, 91% yield) as a white solid with >99:1 er.

$R_f$  = 0.30 (10% MeOH in CHCl<sub>3</sub>). M.p. 30–31 °C.  $[\alpha]_D^{23} = -23.5$  ( $c$  1.02, MeOH). <sup>1</sup>H NMR (400 MHz, CDCl<sub>3</sub>)  $\delta$  7.16 (br t,  $J$  = 5.4 Hz, 1H, NH), 6.95 (br d,  $J$  = 7.3 Hz, 1H, NH), 5.50 (br t,  $J$  = 5.4 Hz, 1H, (CH<sub>3</sub>)<sub>3</sub>COCONH), 4.43 (quin,  $J$  = 7.3 Hz, 1H, CHCH<sub>3</sub>), 4.04 (dd,  $J$  = 16.7, 5.4 Hz, 1H, CH<sub>2</sub>), 3.97 (dd,  $J$  = 16.7, 5.4 Hz, 1H, CH<sub>2</sub>), 3.85 (br d,  $J$  = 5.4 Hz, 2H, CH<sub>2</sub>), 1.46 (s, 9H, CO<sub>2</sub>C(CH<sub>3</sub>)<sub>3</sub>), 1.45 (s, 9H, (CH<sub>3</sub>)<sub>3</sub>COCONH), 1.38 (d,  $J$  = 7.3 Hz, 3H, CHCH<sub>3</sub>). <sup>13</sup>C NMR (100 MHz, CDCl<sub>3</sub>)  $\delta$  171.9, 170.1, 168.2, 156.1, 82.0, 80.2, 48.7, 44.2, 42.8, 28.3 (3C), 27.9 (3C), 18.1. IR (thin film, cm<sup>-1</sup>) 3309, 2979, 2934, 1731, 1652, 1519, 1454, 1367, 1247, 1146, 1051. HRMS (ESI) calculated for C<sub>16</sub>H<sub>29</sub>N<sub>3</sub>O<sub>6</sub>Na [M+Na]<sup>+</sup>  $m/z$  382.1954, found, 382.1963.

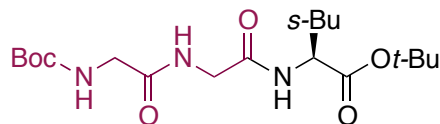

**Boc-Gly-Gly-L-Ile-Ot-Bu (6ab):** A flame-dried 5.0 mL screw-cap vial equipped with a magnetic stirring bar (Sm-Co) was charged with Cyclo(-Boc-Gly-Gly-) (**5a**, 107.1 mg, 0.50 mmol) and H-L-Ile-Ot-Bu (187.3 mg, 1.0 mmol). After the vial was sealed with screw-cap, the resulting mixture was stirred vigorously at 50 °C for 24 h. The reaction mixture was diluted with CHCl<sub>3</sub> (3.0 mL), transferred onto SiO<sub>2</sub> column by a pipette, and used vial and pipette were washed with CHCl<sub>3</sub> 12 mL). The reaction mixture was purified directly by flash column

chromatography (50–100% AcOEt/hexane → 20% MeOH in CHCl<sub>3</sub>) to provide the title compound **6ab** (186.7 mg, 93% yield) as a white solid with >99:1 dr.

$R_f = 0.68$  (AcOEt). M.p. 28–29 °C.  $[\alpha]_D^{27} = -41.5$  ( $c$  1.06, MeOH). <sup>1</sup>H NMR (400 MHz, CDCl<sub>3</sub>)  $\delta$  7.08 (br t,  $J = 5.3$  Hz, 1H, NH), 6.81 (br d,  $J = 8.5$  Hz, 1H, NH), 5.41 (br t,  $J = 5.5$  Hz, 1H, (CH<sub>3</sub>)<sub>3</sub>COCONH), 4.47 (dd,  $J = 8.5, 4.6$  Hz, 1H, CHCH(CH<sub>3</sub>)CH<sub>2</sub>CH<sub>3</sub>), 4.04 (dd,  $J = 16.7, 5.3$  Hz, 1H, CH<sub>2</sub>), 3.99 (dd,  $J = 16.7, 5.3$  Hz, 1H, CH<sub>2</sub>), 3.86 (br d,  $J = 5.5$  Hz, 2H, CH<sub>2</sub>), 1.95–1.80 (CHCHH(CH<sub>3</sub>)CH<sub>2</sub>CH<sub>3</sub>), 1.60–1.35 (m, 1H, CHCH(CH<sub>3</sub>)CH<sub>2</sub>CH<sub>3</sub>), 1.46 (s, 9H, CO<sub>2</sub>C(CH<sub>3</sub>)<sub>3</sub>), 1.45 (s, 9H, (CH<sub>3</sub>)<sub>3</sub>COCONH), 1.30–1.10 (m, 1H, CHCH(CH<sub>3</sub>)CH<sub>2</sub>CH<sub>3</sub>), 0.92 (t,  $J = 7.5$  Hz, 3H, CHCH(CH<sub>3</sub>)CH<sub>2</sub>CH<sub>3</sub>), 0.90 (d,  $J = 6.9$  Hz, 3H, CHCH(CH<sub>3</sub>)CH<sub>2</sub>CH<sub>3</sub>). <sup>13</sup>C NMR (100 MHz, CDCl<sub>3</sub>)  $\delta$  170.7, 170.0, 168.3, 156.0, 82.1, 80.2, 56.9, 44.1, 42.9, 38.0, 28.3 (3C), 28.0 (3C), 25.2, 15.3, 11.7. IR (thin film, cm<sup>-1</sup>) 3304, 2973, 2934, 1731, 1652, 1518, 1456, 1366, 1247, 1143, 1049. HRMS (ESI) calculated for C<sub>19</sub>H<sub>35</sub>N<sub>3</sub>O<sub>6</sub>Na [M+Na]<sup>+</sup>  $m/z$  424.2424, found, 424.2403.

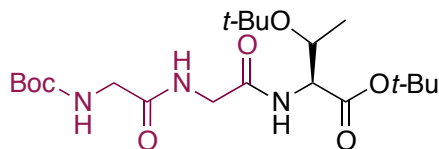

**Boc-Gly-Gly-L-Thr(*t*-Bu)-Ot-Bu (6ac):** A flame-dried 5.0 mL screw-cap vial equipped with a magnetic stirring bar (Sm-Co) was charged with Cyclo(-Boc-Gly-Gly-) (**5a**, 107.1 mg, 0.50 mmol) and H-L-Thr(*t*-Bu)-Ot-Bu (200.6 mg, 1.0 mmol). After the vial was sealed with screw-cap, the resulting mixture was stirred vigorously at 60 °C for 12 h. The reaction mixture was diluted with CHCl<sub>3</sub> (3.0 mL), transferred onto SiO<sub>2</sub> column by a pipette, and used vial and pipette were washed with CHCl<sub>3</sub> (12 mL). The reaction mixture was purified directly by flash column chromatography (1–10% MeOH in CHCl<sub>3</sub>) to provide a mixture of the title compound **6ac** and H-L-Thr(*t*-Bu)-Ot-Bu. Finally, H-L-Thr(*t*-Bu)-Ot-Bu was evaporated *in vacuo* with the aid of an oil diffusion pump to provide **6ac** (200.6 mg, 90% yield) as a white solid with >99:1 dr.

$R_f = 0.59$  (AcOEt). M.p. 31–32 °C.  $[\alpha]_D^{28} = +2.9$  ( $c$  1.03, MeOH). <sup>1</sup>H NMR (400 MHz, CDCl<sub>3</sub>)  $\delta$  6.95 (br dd,  $J = 5.3, 5.0$  Hz, 1H, NH), 6.53 (br d,  $J = 9.2$  Hz, 1H, NH), 5.31 (br t,  $J = 5.3$  Hz, 1H, (CH<sub>3</sub>)<sub>3</sub>COCONH), 4.36 (dd,  $J = 9.2, 2.1$  Hz, 1H, CHCH(CH<sub>3</sub>)OC(CH<sub>3</sub>)<sub>3</sub>), 4.20 (qd,  $J = 6.2, 2.1$  Hz, 1H, CHCHH(CH<sub>3</sub>)OC(CH<sub>3</sub>)<sub>3</sub>), 4.09 (dd,  $J = 16.8, 5.3$  Hz, 1H, CH<sub>2</sub>), 4.30 (dd,  $J = 16.8, 5.0$  Hz, 1H, CH<sub>2</sub>), 3.87 (br d,  $J = 5.3$  Hz, 2H, CH<sub>2</sub>), 1.46 (s, 9H, CO<sub>2</sub>C(CH<sub>3</sub>)<sub>3</sub>), 1.45 (s, 9H, (CH<sub>3</sub>)<sub>3</sub>COCONH), 1.16 (s, 9H, CHCH(CH<sub>3</sub>)OC(CH<sub>3</sub>)<sub>3</sub>), 1.16 (d,  $J = 6.2$  Hz, 3H, CHCHH<sub>3</sub>). <sup>13</sup>C

NMR (100 MHz, CDCl<sub>3</sub>)  $\delta$  169.7, 169.5, 168.7, 155.9, 82.1, 80.1, 73.9, 67.0, 58.4, 44.0, 42.6, 28.6 (3C), 28.2 (3C), 28.0 (3C), 20.9. IR (thin film, cm<sup>-1</sup>) 3340, 2977, 2932, 1723, 1660, 1515, 1506, 1366, 1244, 1147, 1082. HRMS (ESI) calculated for C<sub>21</sub>H<sub>39</sub>N<sub>3</sub>O<sub>7</sub>Na [M+Na]<sup>+</sup> *m/z* 468.2686, found, 468.2659.

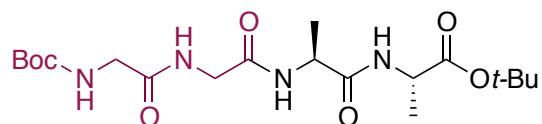

**Boc-Gly-Gly-L-Ala-L-Ala-Ot-Bu (6ad):** A flame-dried 5.0 mL screw-cap vial equipped with a magnetic stirring bar (Nd) was charged with Cyclo(-Boc-Gly-Gly-) (**5a**, 107.1 mg, 0.50 mmol) and H-L-Ala-L-Ala-Ot-Bu (216.3 mg, 1.0 mmol). After the vial was sealed with screw-cap, the resulting mixture was stirred vigorously at 50 °C for 48 h. The reaction mixture was diluted with CHCl<sub>3</sub> (3.0 mL), transferred onto SiO<sub>2</sub> column by a pipette, and used vial and pipette were washed with CHCl<sub>3</sub> (12 mL). The reaction mixture was purified directly by flash column chromatography (80–100% AcOEt/hexane → 10–20% MeOH in CHCl<sub>3</sub>) to provide the title compound **6ad** (206.7 mg, 96% yield) as a white solid with >99:1 dr.

*R*<sub>f</sub> = 0.35 (AcOEt). M.p. 69–70 °C. [ $\alpha$ ]<sub>D</sub><sup>25</sup> = –48.7 (*c* 1.23, MeOH). <sup>1</sup>H NMR (400 MHz, CDCl<sub>3</sub>)  $\delta$  7.75 (br t, *J* = 4.4 Hz, 1H, NH), 7.52 (br d, *J* = 7.1 Hz, 1H, NH), 7.41 (br d, *J* = 7.4 Hz, 1H, NH), 5.79 (br t, *J* = 4.4 Hz, 1H, (CH<sub>3</sub>)<sub>3</sub>COCONH), 4.79 (quin, *J* = 7.1 Hz, 1H, CHCH<sub>3</sub>), 4.47 (quin, *J* = 7.4 Hz, 1H, CHCH<sub>3</sub>), 4.14 (dd, *J* = 17.2, 4.4 Hz, 1H, CH<sub>2</sub>), 4.06 (dd, *J* = 17.2, 4.4 Hz, 1H, CH<sub>2</sub>), 3.98 (d, *J* = 4.4 Hz, 2H, CH<sub>2</sub>), 1.45 (s, 9H, CO<sub>2</sub>C(CH<sub>3</sub>)<sub>3</sub>), 1.44 (s, 9H, (CH<sub>3</sub>)<sub>3</sub>COCONH), 1.40 (d, *J* = 7.1 Hz, 3H, CHCH<sub>3</sub>), 1.37 (d, *J* = 7.4 Hz, 3H, CHCH<sub>3</sub>). <sup>13</sup>C NMR (100 MHz, CDCl<sub>3</sub>)  $\delta$  171.9, 171.7, 169.8, 168.3, 156.1, 81.7, 79.8, 48.8, 48.6, 43.9, 43.0, 28.3 (3C), 27.9 (3C), 19.1, 18.0. IR (thin film, cm<sup>-1</sup>) 3309, 2979, 1730, 1702, 1667, 1634, 1504, 1447, 1366, 1244, 1151. HRMS (ESI) calculated for C<sub>19</sub>H<sub>34</sub>N<sub>4</sub>O<sub>7</sub>Na [M+Na]<sup>+</sup> *m/z* 453.2325, found, 453.2295.

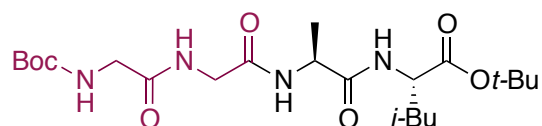

**Boc-Gly-Gly-L-Ala-L-Leu-Ot-Bu (6ae):** A flame-dried 5.0 mL screw-cap vial equipped with a magnetic stirring bar (Nd) was charged with Cyclo(-Boc-Gly-Gly-) (**5a**, 107.1 mg, 0.50 mmol)

and H-L-Ala-L-Leu-Ot-Bu (258.2 mg, 1.0 mmol). After the vial was sealed with screw-cap, the resulting mixture was stirred vigorously at 50 °C for 48 h. The reaction mixture was diluted with CHCl<sub>3</sub> (3.0 mL), transferred onto SiO<sub>2</sub> column by a pipette, and used vial and pipette were washed with CHCl<sub>3</sub> (12 mL). The reaction mixture was purified directly by flash column chromatography (80–100% AcOEt/hexane → 10% MeOH in CHCl<sub>3</sub>) to provide the title compound **6ae** (229.2 mg, 97% yield) as a white solid with >99:1 dr.

$R_f$  = 0.50 (AcOEt). M.p. 135–137 °C.  $[\alpha]_D^{25}$  = –52.5 ( $c$  1.18, MeOH). <sup>1</sup>H NMR (400 MHz, CDCl<sub>3</sub>)  $\delta$  7.58 (br t,  $J$  = 4.8 Hz, 1H, NH), 7.19 (br d,  $J$  = 7.1 Hz, 1H, NH), 7.09 (br d,  $J$  = 8.6 Hz, 1H, NH), 5.62 (br t,  $J$  = 4.4 Hz, 1H, (CH<sub>3</sub>)<sub>3</sub>COCONH), 4.73 (quin,  $J$  = 7.1 Hz, 1H, CHCH<sub>3</sub>), 4.45 (td,  $J$  = 8.6, 5.1 Hz, 1H, CHCH<sub>2</sub>CH(CH<sub>3</sub>)<sub>2</sub>), 4.05 (d,  $J$  = 4.8 Hz, 2H, CH<sub>2</sub>), 3.96 (dd,  $J$  = 4.4 Hz, 2H, CH<sub>2</sub>), 1.75–1.40 (m, 3H, CHCH<sub>2</sub>CH(CH<sub>3</sub>)<sub>2</sub>), 1.45 (s, 9H, CO<sub>2</sub>C(CH<sub>3</sub>)<sub>3</sub>), 1.44 (s, 9H, (CH<sub>3</sub>)<sub>3</sub>COCONH), 1.40 (d,  $J$  = 7.1 Hz, 3H, CHCH<sub>3</sub>), 0.92 (d,  $J$  = 6.0 Hz, 3H, CHCH<sub>2</sub>CH(CH<sub>3</sub>)<sub>2</sub>), 0.91 (d,  $J$  = 6.0 Hz, 3H, CHCH<sub>2</sub>CH(CH<sub>3</sub>)<sub>2</sub>). <sup>13</sup>C NMR (100 MHz, CDCl<sub>3</sub>)  $\delta$  172.0, 171.7, 169.8, 168.2, 156.1, 81.7, 80.0, 51.5, 48.8, 44.0, 42.9, 41.1, 28.3 (3C), 27.9 (3C), 24.8, 22.7, 21.9, 18.9. IR (thin film, cm<sup>–1</sup>) 3297, 2974, 1727, 1702, 1667, 1637, 1505, 1453, 1366, 1247, 1149. HRMS (ESI) calculated for C<sub>22</sub>H<sub>40</sub>N<sub>4</sub>O<sub>7</sub>Na [M+Na]<sup>+</sup>  $m/z$  495.2795, found, 495.2768.

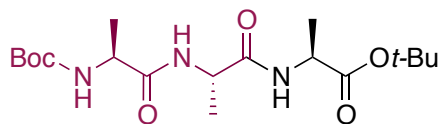

**Boc-L-Ala-L-Ala-L-Ala-Ot-Bu (6ba, CAS No. 2249882-15-1)**<sup>6</sup>: A flame-dried 5.0 mL screw-cap vial equipped with a magnetic stirring bar (Sm-Co) was charged with Cyclo(-Boc-L-Ala-L-Ala-) (**5b**, 121.1 mg, 0.50 mmol) and H-L-Ala-Ot-Bu (145.2 mg, 1.0 mmol). After the vial was sealed with screw-cap, the resulting mixture was stirred vigorously at 30 °C for 24 h. The reaction mixture was diluted with CHCl<sub>3</sub> (3.0 mL), transferred onto SiO<sub>2</sub> column by a pipette, and used vial and pipette were washed with CHCl<sub>3</sub> (12 mL). The reaction mixture was purified directly by flash column chromatography (1–10% MeOH in CHCl<sub>3</sub>) to provide a mixture of the title compound **6ba** and H-L-Ala-Ot-Bu. Finally, H-L-Ala-Ot-Bu was evaporated *in vacuo* with the aid of an oil rotary vacuum pump to provide **6ba** (158.9 mg, 82% yield) as a white solid with >99:1 dr.

$R_f = 0.68$  (AcOEt). M.p. 180–182 °C.  $^1\text{H}$  NMR (400 MHz,  $\text{CDCl}_3$ )  $\delta$  6.89 (br d,  $J = 6.8$  Hz, 1H,  $\text{NH}$ ), 6.87 (br d,  $J = 7.1$  Hz, 1H,  $\text{NH}$ ), 5.20 (br d,  $J = 7.1$  Hz, 1H,  $(\text{CH}_3)_3\text{COCONH}$ ), 4.53 (quin,  $J = 6.8$  Hz, 1H,  $\text{CHCH}_3$ ), 4.42 (quin,  $J = 7.1$  Hz, 1H,  $\text{CHCH}_3$ ), 4.20 (br quin, 1H,  $\text{CHCH}_3$ ), 1.46 (s, 9H,  $\text{CO}_2\text{C}(\text{CH}_3)_3$ ), 1.44 (s, 9H,  $(\text{CH}_3)_3\text{COCONH}$ ), 1.39 (d,  $J = 6.8$  Hz, 3H,  $\text{CHCH}_3$ ), 1.36 (d,  $J = 7.1$  Hz, 3H,  $\text{CHCH}_3$ ), 1.36 (d,  $J = 7.1$  Hz, 3H,  $\text{CHCH}_3$ ).  $^{13}\text{C}$  NMR (100 MHz,  $\text{CDCl}_3$ )  $\delta$  172.5, 171.8, 171.4, 155.5, 81.9, 80.1, 50.1, 48.7, 48.7, 28.3 (3C), 27.9 (3C), 18.5 (2C), 18.3. IR (thin film,  $\text{cm}^{-1}$ ) 3309, 2977, 1737, 1674, 1637, 1516, 1454, 1368, 1251, 1151, 1050.

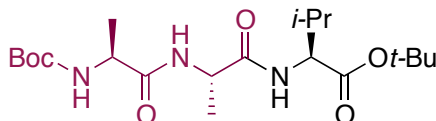

**Boc-L-Ala-L-Ala-L-Val-Ot-Bu (6bb, CAS No. 2249882-18-4)**<sup>6</sup>: A flame-dried 5.0 mL screw-cap vial equipped with a magnetic stirring bar (Sm-Co) was charged with Cyclo(-Boc-L-Ala-L-Ala-) (**5b**, 121.1 mg, 0.50 mmol) and H-L-Val-Ot-Bu (173.3 mg, 1.0 mmol). After the vial was sealed with screw-cap, the resulting mixture was stirred vigorously at 50 °C for 48 h. The reaction mixture was diluted with  $\text{CHCl}_3$  (3.0 mL), transferred onto  $\text{SiO}_2$  column by a pipette, and used vial and pipette were washed with  $\text{CHCl}_3$  (12 mL). The reaction mixture was purified directly by flash column chromatography (10–100% AcOEt in hexane) to provide the title compound **6bb** (191.1 mg, 92% yield) as a white solid with >99:1 dr.

$R_f = 0.63$  (80% AcOEt in hexane). M.p. 73–75 °C.  $^1\text{H}$  NMR (400 MHz,  $\text{CDCl}_3$ )  $\delta$  6.93 (br d,  $J = 7.1$  Hz, 1H,  $\text{NH}$ ), 6.86 (br d,  $J = 8.7$  Hz, 1H,  $\text{NH}$ ), 5.26 (br d,  $J = 7.1$  Hz, 1H,  $(\text{CH}_3)_3\text{COCONH}$ ), 4.58 (quin,  $J = 7.1$  Hz, 1H,  $\text{CHCH}_3$ ), 4.40 (dd,  $J = 8.7, 4.6$  Hz, 1H,  $\text{CHCH}(\text{CH}_3)_2$ ), 4.22 (br quin,  $J = 7.1$  Hz, 1H,  $\text{CHCH}_3$ ), 2.25–2.10 (m, 1H,  $\text{CHCH}(\text{CH}_3)_2$ ), 1.47 (s, 9H,  $\text{CO}_2\text{C}(\text{CH}_3)_3$ ), 1.44 (s, 9H,  $(\text{CH}_3)_3\text{COCONH}$ ), 1.39 (d,  $J = 7.1$  Hz, 3H,  $\text{CHCH}_3$ ), 1.35 (d,  $J = 7.1$  Hz, 3H,  $\text{CHCH}_3$ ), 0.91 (dd,  $J = 7.1$  Hz, 3H,  $\text{CHCH}(\text{CH}_3)_2$ ), 0.90 (dd,  $J = 7.1$  Hz, 3H,  $\text{CHCH}(\text{CH}_3)_2$ ).  $^{13}\text{C}$  NMR (100 MHz,  $\text{CDCl}_3$ )  $\delta$  172.6, 171.8, 170.6, 155.4, 81.9, 80.0, 57.5, 50.0, 48.8, 31.2, 28.3 (3C), 28.0 (3C), 18.8, 18.5, 18.1, 17.5. IR (thin film,  $\text{cm}^{-1}$ ) 3281, 2977, 1706, 1641, 1505, 1453, 1391, 1366, 1312, 1225, 1151.

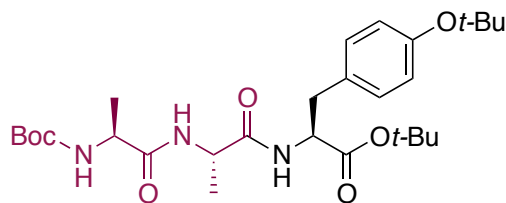

**Boc-L-Ala-L-Ala-L-Tyr(*t*-Bu)-Ot-Bu (6bc):** A flame-dried 5.0 mL screw-cap vial equipped with a magnetic stirring bar (Sm-Co) was charged with Cyclo(-Boc-L-Ala-L-Ala-) (**5b**, 121.1 mg, 0.50 mmol) and H-L-Tyr(*t*-Bu)-Ot-Bu (205.3 mg, 1.0 mmol). After the vial was sealed with screw-cap, the resulting mixture was stirred vigorously at 50 °C for 24 h. The reaction mixture was diluted with CHCl<sub>3</sub> (3.0 mL), transferred onto SiO<sub>2</sub> column by a pipette, and used vial and pipette were washed with CHCl<sub>3</sub> (12 mL). The reaction mixture was purified directly by flash column chromatography (30–100% AcOEt in hexane) to provide the title compound **6bc** (222.2 mg, 83% yield) as a white solid with >99:1 dr.

$R_f = 0.57$  (80% AcOEt in hexane). M.p. 60–62 °C.  $[\alpha]_D^{22} = -23.4$  ( $c$  1.07, MeOH). <sup>1</sup>H NMR (400 MHz, CDCl<sub>3</sub>)  $\delta$  7.10–7.00 (m, 2H, CHCH<sub>2</sub>C<sub>6</sub>H<sub>4</sub>OC(CH<sub>3</sub>)<sub>3</sub>), 6.95–6.85 (m, 2H, CHCH<sub>2</sub>C<sub>6</sub>H<sub>4</sub>OC(CH<sub>3</sub>)<sub>3</sub>), 6.82 (br d,  $J = 7.1$  Hz, 1H, NH), 6.67 (br d,  $J = 6.1$  Hz, 1H, NH), 5.15 (br d,  $J = 7.1$  Hz, 1H, (CH<sub>3</sub>)<sub>3</sub>COCONH), 4.75–4.60 (m, 1H, CHCH<sub>3</sub>), 4.48 (quin,  $J = 7.1$  Hz, 1H, CHCH<sub>3</sub>), 4.25–4.10 (m, 1H, CHCH<sub>2</sub>C<sub>6</sub>H<sub>4</sub>OC(CH<sub>3</sub>)<sub>3</sub>), 3.05 (dd,  $J = 13.9, 5.8$  Hz, 1H, CHCH<sub>2</sub>C<sub>6</sub>H<sub>4</sub>OC(CH<sub>3</sub>)<sub>3</sub>), 3.00 (dd,  $J = 13.9, 6.3$  Hz, 1H, CHCH<sub>2</sub>C<sub>6</sub>H<sub>4</sub>OC(CH<sub>3</sub>)<sub>3</sub>), 1.45 (s, 9H, CO<sub>2</sub>C(CH<sub>3</sub>)<sub>3</sub>), 1.37 (s, 9H, (CH<sub>3</sub>)<sub>3</sub>COCONH), 1.34 (d,  $J = 7.1$  Hz, 6H, CHCH<sub>3</sub> and CHCH<sub>3</sub>), 1.32 (s, 9H, CHCH<sub>2</sub>C<sub>6</sub>H<sub>4</sub>OC(CH<sub>3</sub>)<sub>3</sub>). <sup>13</sup>C NMR (100 MHz, CDCl<sub>3</sub>)  $\delta$  172.4, 171.3, 170.2, 155.5, 154.3, 130.9, 129.9 (2C), 124.0 (2C), 82.3, 80.1, 78.3, 53.7, 50.0, 48.8, 37.4, 28.8 (3C), 28.3 (3C), 27.9 (3C), 18.3 (2C). IR (thin film, cm<sup>-1</sup>) 3286, 2977, 2931, 1704, 1637, 1504, 1446, 1364, 1234, 1152, 1047. HRMS (ESI) calculated for C<sub>28</sub>H<sub>45</sub>N<sub>3</sub>O<sub>7</sub>Na [M+Na]<sup>+</sup>  $m/z$  558.3155, found, 558.3136.

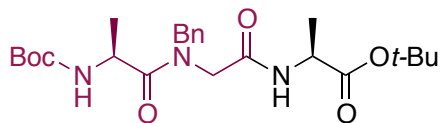

**Boc-L-Ala-Bn-Gly-L-Ala-Ot-Bu (6ca):** A flame-dried 5.0 mL screw-cap vial equipped with a magnetic stirring bar (Sm-Co) was charged with Cyclo(-Boc-L-Ala-Bn-Gly-) (**5c**, 159.2 mg, 0.50 mmol) and H-L-Ala-Ot-Bu (145.2 mg, 1.0 mmol). After the vial was sealed with screw-cap, the

resulting mixture was stirred vigorously at 50 °C for 24 h. The reaction mixture was diluted with CHCl<sub>3</sub> (3.0 mL), transferred onto SiO<sub>2</sub> column by a pipette, and used vial and pipette were washed with CHCl<sub>3</sub> (12 mL). The reaction mixture was purified directly by flash column chromatography (10–80% AcOEt in hexane) to provide the title compound **6ca** (220.2 mg, 95% yield, ratio of rotamers = 60:40) as a white solid with >99:1 dr.

R<sub>f</sub> = 0.55 (50% AcOEt in hexane). M.p. 38–40 °C. [ $\alpha$ ]<sub>D</sub><sup>24</sup> = –13.0 (*c* 1.00, MeOH). <sup>1</sup>H NMR (400 MHz, CDCl<sub>3</sub>)  $\delta$  7.45 (br d, *J* = 7.2 Hz, 1H x 40/100, NH), 7.40–7.15 (m, 5H, C<sub>6</sub>H<sub>5</sub>CH<sub>2</sub>N), 6.85 (br d, *J* = 7.2 Hz, 1H x 60/100, NH), 5.29 (br d, *J* = 7.1 Hz, 1H x 60/100, (CH<sub>3</sub>)<sub>3</sub>COCONH), 5.20 (br d, *J* = 7.1 Hz, 1H x 40/100, (CH<sub>3</sub>)<sub>3</sub>COCONH), 4.95–4.20 (m, 4H + 1H x 60/100, CHCH<sub>3</sub>, C<sub>6</sub>H<sub>5</sub>CH<sub>2</sub>N, CH<sub>2</sub>, and CHCH<sub>3</sub>), 4.03 (d, *J* = 18.1 Hz, 1H x 60/100, CH<sub>2</sub>), 3.98 (d, *J* = 18.1 Hz, 1H x 60/100, CH<sub>2</sub>), 3.84 (d, *J* = 16.3, 1H x 40/100, CH<sub>2</sub>), 1.47 (s, 9H x 60/100, CO<sub>2</sub>C(CH<sub>3</sub>)<sub>3</sub>), 1.43 (s, 18H x 40/100, (CH<sub>3</sub>)<sub>3</sub>COCONH and CO<sub>2</sub>C(CH<sub>3</sub>)<sub>3</sub>), 1.42 (s, 9H x 60/100, (CH<sub>3</sub>)<sub>3</sub>COCONH), 1.36 (d, *J* = 7.2 Hz, 3H x 60/100, CHCH<sub>3</sub>), 1.34 (d, *J* = 7.2 Hz, 3H x 40/100, CHCH<sub>3</sub>), 1.29 (d, *J* = 7.1 Hz, 3H x 40/100, CHCH<sub>3</sub>), 1.24 (d, *J* = 7.1 Hz, 3H x 60/100, CHCH<sub>3</sub>). <sup>13</sup>C NMR (100 MHz, CDCl<sub>3</sub>)  $\delta$  174.3 (1C x 60/100), 173.7 (1C x 40/100), 171.8 (1C x 60/100), 171.5 (1C x 40/100), 167.8 (1C x 60/100), 167.6 (1C x 40/100), 156.0 (1C x 40/100), 155.4 (1C x 60/100), 136.4 (1C x 40/100), 135.6 (1C x 60/100), 128.9 (2C x 60/100), 128.6 (2C x 40/100), 128.5 (1C x 60/100), 128.0 (2C x 40/100), 127.7 (1C x 40/100), 126.9 (2C x 60/100), 81.8 (1C x 60/100), 81.5 (1C x 40/100), 80.2 (1C x 60/100), 79.9 (1C x 40/100), 52.0 (1C x 60/100), 50.8 (1C x 40/100), 50.5 (1C x 40/100), 49.7 (1C x 60/100), 48.9 (1C x 40/100), 48.6 (1C x 60/100), 46.9 (1C x 40/100), 46.3 (1C x 60/100), 28.3 (3C x 60/100), 28.2 (3C x 40/100), 27.9 (3C x 60/100), 27.9 (3C x 40/100), 18.3 (1C x 40/100), 18.2 (1C x 60/100), 17.3 (1C x 60/100), 17.1 (1C x 40/100). IR (thin film, cm<sup>-1</sup>) 3292, 2977, 2932, 1732, 1686, 1645, 1520, 1452, 1366, 1222, 1147. HRMS (ESI) calculated for C<sub>24</sub>H<sub>37</sub>N<sub>3</sub>O<sub>6</sub>Na [M+Na]<sup>+</sup> *m/z* 486.2580, found, 486.2563.

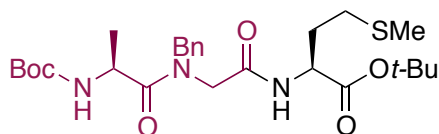

**Boc-L-Ala-Bn-Gly-L-Met-Ot-Bu (6cb):** A flame-dried 5.0 mL screw-cap vial equipped with a magnetic stirring bar (Sm-Co) was charged with Cyclo(-Boc-L-Ala-Bn-Gly-) (**5c**, 159.2 mg, 0.50 mmol) and H-L-Met-Ot-Bu (205.3 mg, 1.0 mmol). After the vial was sealed with screw-cap, the



resulting mixture was stirred vigorously at 50 °C for 24 h. The reaction mixture was diluted with CHCl<sub>3</sub> (3.0 mL), transferred onto SiO<sub>2</sub> column by a pipette, and used vial and pipette were washed with CHCl<sub>3</sub> (12 mL). The reaction mixture was purified directly by flash column chromatography (30–80% AcOEt in hexane) to provide the title compound **6cb** (251.3 mg, 96% yield, ratio of rotamers = 60:40) as a white solid with >99:1 dr.

$R_f$  = 0.36 (50% AcOEt in hexane). M.p. 29–30 °C.  $[\alpha]_D^{22}$  = –21.2 ( $c$  1.18, MeOH). <sup>1</sup>H NMR (400 MHz, CDCl<sub>3</sub>)  $\delta$  7.60 (br d,  $J$  = 7.8 Hz, 1H x 40/100, NH), 7.40–7.15 (m, 5H, C<sub>6</sub>H<sub>5</sub>CH<sub>2</sub>N), 6.88 (br d,  $J$  = 7.3 Hz, 1H x 60/100, NH), 5.33 (br d,  $J$  = 6.6 Hz, 1H x 60/100, (CH<sub>3</sub>)<sub>3</sub>COCONH), 5.20 (br d,  $J$  = 6.9 Hz, 1H x 40/100, (CH<sub>3</sub>)<sub>3</sub>COCONH), 4.90–4.40 (m, 4H, CHCH<sub>3</sub>, C<sub>6</sub>H<sub>5</sub>CH<sub>2</sub>N, and CHCH<sub>2</sub>CH<sub>2</sub>SCH<sub>3</sub>), 4.22 (d,  $J$  = 15.8 Hz, 1H x 60/100, CH<sub>2</sub>), 4.02 (s, 1H x 40/100, CH<sub>2</sub>), 4.01 (s, 1H x 40/100, CH<sub>2</sub>), 3.87 (d,  $J$  = 15.8, 1H x 60/100, CH<sub>2</sub>), 2.55–2.35 (m, 2H, CHCH<sub>2</sub>CH<sub>2</sub>SCH<sub>3</sub>), 2.20–2.00 (m, 1H, CHCH<sub>2</sub>CH<sub>2</sub>SCH<sub>3</sub>), 2.09 (s, 3H, CHCH<sub>2</sub>CH<sub>2</sub>SCH<sub>3</sub>), 2.00–1.85 (m, 1H, CHCH<sub>2</sub>CH<sub>2</sub>SCH<sub>3</sub>), 1.48 (s, 9H x 60/100, CO<sub>2</sub>C(CH<sub>3</sub>)<sub>3</sub>), 1.44 (s, 9H x 40/100, CO<sub>2</sub>C(CH<sub>3</sub>)<sub>3</sub>), 1.43 (s, 9H x 40/100, (CH<sub>3</sub>)<sub>3</sub>COCONH), 1.43 (s, 9H x 60/100, (CH<sub>3</sub>)<sub>3</sub>COCONH), 1.35 (d,  $J$  = 6.9 Hz, 3H x 40/100, CHCH<sub>3</sub>), 1.28 (d,  $J$  = 6.6 Hz, 3H x 60/100, CHCH<sub>3</sub>). <sup>13</sup>C NMR (100 MHz, CDCl<sub>3</sub>)  $\delta$  174.2 (1C x 60/100), 173.6 (1C x 40/100), 170.6 (1C x 60/100), 170.5 (1C x 40/100), 168.2 (1C x 40/100), 168.1 (1C x 60/100), 156.1 (1C x 60/100), 155.3 (1C x 40/100), 136.3 (1C x 40/100), 135.5 (1C x 60/100), 129.0 (2C x 60/100), 128.7 (2C x 40/100), 128.4 (1C x 60/100), 128.0 (2C x 40/100), 127.8 (1C x 40/100), 127.0 (2C x 60/100), 82.3 (1C x 60/100), 81.9 (1C x 40/100), 80.3 (1C x 40/100), 79.9 (1C x 60/100), 52.6 (1C x 40/100), 52.1 (1C x 60/100), 50.4 (1C x 60/100), 50.7 (1C x 40/100), 50.4 (1C x 40/100), 49.8 (1C x 60/100), 46.9 (1C x 60/100), 46.3 (1C x 40/100), 31.9 (1C x 60/100), 30.6 (1C x 40/100), 30.4 (1C x 40/100), 30.0 (1C x 60/100), 28.3 (3C x 60/100), 28.3 (3C x 40/100), 28.0 (3C x 60/100), 27.9 (3C x 40/100), 18.6 (1C x 60/100), 17.3 (1C x 40/100), 15.5 (1C x 60/100), 15.4 (1C x 40/100). IR (thin film, cm<sup>–1</sup>) 3207, 2979, 2931, 1682, 1651, 1645, 1518, 1447, 1366, 1226, 1151. HRMS (ESI) calculated for C<sub>26</sub>H<sub>41</sub>N<sub>3</sub>O<sub>6</sub>SNa [M+Na]<sup>+</sup>  $m/z$  546.2614, found, 546.2622.

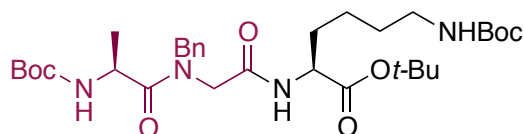

**Boc-L-Ala-Bn-Gly-L-Lys(Boc)-Ot-Bu (6cc):** A flame-dried 5.0 mL screw-cap vial equipped with a magnetic stirring bar (Sm-Co) was charged with Cyclo(-Boc-L-Ala-Bn-Gly-) (**5c**, 159.2 mg, 0.50 mmol) and H-L-Lys(Boc)-Ot-Bu (302.4 mg, 1.0 mmol). After the vial was sealed with screw-cap, the resulting mixture was stirred vigorously at 50 °C for 24 h. The reaction mixture was diluted with CHCl<sub>3</sub> (3.0 mL), transferred onto SiO<sub>2</sub> column by a pipette, and used vial and pipette were washed with CHCl<sub>3</sub> (12 mL). The reaction mixture was purified directly by flash column chromatography (30–100% AcOEt in hexane) to provide the title compound **6cc** (304.1 mg, 98% yield, ratio of rotamers = 60:40) as a white solid with >99:1 dr.

$R_f$  = 0.29 (50% AcOEt in hexane). M.p. 44–45 °C.  $[\alpha]_D^{23}$  = –28.0 ( $c$  1.18, MeOH). <sup>1</sup>H NMR (400 MHz, CDCl<sub>3</sub>)  $\delta$  7.50–7.20 (m, 5H + 1H x 40/100, C<sub>6</sub>H<sub>5</sub>CH<sub>2</sub>N and NH), 6.73 (br d,  $J$  = 6.9 Hz, 1H x 60/100, NH), 5.45 (br d,  $J$  = 4.8 Hz, 1H x 60/100, (CH<sub>3</sub>)<sub>3</sub>COCONH), 5.26 (br d,  $J$  = 7.4 Hz, 1H x 40/100, (CH<sub>3</sub>)<sub>3</sub>COCONH), 5.10–4.25 (m, 5H, CHCH<sub>3</sub>, C<sub>6</sub>H<sub>5</sub>CH<sub>2</sub>N, and CHCH<sub>2</sub>CH<sub>2</sub>CH<sub>2</sub>CH<sub>2</sub>NHCO<sub>2</sub>C(CH<sub>3</sub>)<sub>3</sub>), 4.16 (d,  $J$  = 15.7 Hz, 1H x 60/100, CH<sub>2</sub>), 4.05 (d,  $J$  = 17.9 Hz, 1H x 40/100, CH<sub>2</sub>), 3.98 (d,  $J$  = 17.9 Hz, 1H x 40/100, CH<sub>2</sub>), 3.85 (d,  $J$  = 15.7 Hz, 1H x 60/100, CH<sub>2</sub>), 3.20–3.00 (m, 2H, CHCH<sub>2</sub>CH<sub>2</sub>CH<sub>2</sub>CH<sub>2</sub>NHCO<sub>2</sub>C(CH<sub>3</sub>)<sub>3</sub>), 1.90–1.70 (m, 1H, CHCH<sub>2</sub>CH<sub>2</sub>CH<sub>2</sub>CH<sub>2</sub>NHCO<sub>2</sub>C(CH<sub>3</sub>)<sub>3</sub>), 1.70–1.55 (m, 1H, CHCH<sub>2</sub>CH<sub>2</sub>CH<sub>2</sub>CH<sub>2</sub>NHCO<sub>2</sub>C(CH<sub>3</sub>)<sub>3</sub>), 1.55–1.20 (m, 4H, CHCH<sub>2</sub>CH<sub>2</sub>CH<sub>2</sub>CH<sub>2</sub>NHCO<sub>2</sub>C(CH<sub>3</sub>)<sub>3</sub>), 1.46 (s, 9H x 60/100, CO<sub>2</sub>C(CH<sub>3</sub>)<sub>3</sub>), 1.44 (s, 9H x 40/100, CO<sub>2</sub>C(CH<sub>3</sub>)<sub>3</sub>), 1.43 (s, 18H x 40/100, (CH<sub>3</sub>)<sub>3</sub>COCONH and CHCH<sub>2</sub>CH<sub>2</sub>CH<sub>2</sub>CH<sub>2</sub>NHCO<sub>2</sub>C(CH<sub>3</sub>)<sub>3</sub>), 1.42 (s, 18H x 60/100, (CH<sub>3</sub>)<sub>3</sub>COCONH and CHCH<sub>2</sub>CH<sub>2</sub>CH<sub>2</sub>CH<sub>2</sub>NHCO<sub>2</sub>C(CH<sub>3</sub>)<sub>3</sub>), 1.35 (d,  $J$  = 6.9 Hz, 3H x 40/100, CHCH<sub>3</sub>), 1.28 (d,  $J$  = 6.9 Hz, 3H x 60/100, CHCH<sub>3</sub>). <sup>13</sup>C NMR (100 MHz, CDCl<sub>3</sub>)  $\delta$  174.5 (1C x 40/100), 173.7 (1C x 60/100), 171.0 (1C x 60/100), 170.0 (1C x 40/100), 168.0 (1C x 40/100), 167.8 (1C x 60/100), 156.0 (1C x 60/100), 155.9 (1C x 40/100), 155.3, 136.3 (1C x 40/100), 135.5 (1C x 60/100), 129.0 (2C x 60/100), 128.6 (2C x 40/100), 128.3 (1C x 60/100), 128.0 (2C x 40/100), 127.6 (1C x 40/100), 127.0 (2C x 60/100), 81.9 (1C x 60/100), 81.8 (1C x 40/100), 80.1 (1C x 40/100), 79.8 (1C x 60/100), 79.0, 53.1 (1C x 40/100), 52.3 (1C x 60/100), 52.3 (1C x 60/100), 50.4 (1C x 40/100), 50.3 (1C x 60/100), 50.0 (1C x 40/100), 40.1 (1C x 40/100), 40.0 (1C x 60/100), 31.8 (1C x 60/100), 31.0 (1C x 40/100), 29.5 (1C x 40/100), 29.2 (1C x 60/100), 28.4 (3C x 60/100), 28.3 (3C), 28.2 (3C x 40/100), 28.0 (3C x 60/100), 27.9 (3C x 40/100), 22.8 (1C x 40/100), 22.1 (1C x 60/100), 18.6 (1C x 60/100), 17.6 (1C x 40/100). IR (thin film, cm<sup>–1</sup>) 3321, 2977, 2932,

1682, 1651, 1517, 1454, 1365, 1247, 1156, 1027. HRMS (ESI) calculated for C<sub>32</sub>H<sub>52</sub>N<sub>4</sub>O<sub>8</sub>Na [M+Na]<sup>+</sup> *m/z* 643.3683, found, 643.3648.

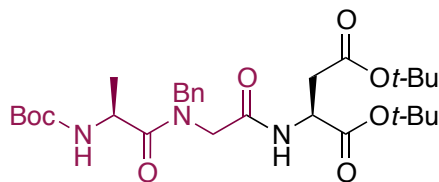

**Boc-L-Ala-Bn-Gly-L-Asp(*t*-Bu)-Ot-Bu (6cd):** A flame-dried 5.0 mL screw-cap vial equipped with a magnetic stirring bar (Sm-Co) was charged with Cyclo(-Boc-L-Ala-Bn-Gly-) (**5c**, 159.2 mg, 0.50 mmol) and H-L-Asp(*t*-Bu)-Ot-Bu (245.3 mg, 1.0 mmol). After the vial was sealed with screw-cap, the resulting mixture was stirred vigorously at 50 °C for 24 h. The reaction mixture was diluted with CHCl<sub>3</sub> (3.0 mL), transferred onto SiO<sub>2</sub> column by a pipette, and used vial and pipette were washed with CHCl<sub>3</sub> (12 mL). The reaction mixture was purified directly by flash column chromatography (30–80% AcOEt in hexane) to provide the title compound **6cd** (259.3 mg, 92% yield, ratio of rotamers = 60:40) as a white solid with >99:1 dr.

*R*<sub>f</sub> = 0.36 (50% AcOEt in hexane). M.p. 40–41 °C. [α]<sub>D</sub><sup>21</sup> = –25.2 (*c* 1.11, MeOH). <sup>1</sup>H NMR (400 MHz, CDCl<sub>3</sub>) δ 7.40–7.15 (m, 5H + 1H x 40/100, C<sub>6</sub>H<sub>5</sub>CH<sub>2</sub>N and NH), 6.98 (br d, *J* = 8.3 Hz, 1H x 60/100, NH), 5.51 (br d, *J* = 6.6 Hz, 1H x 60/100, (CH<sub>3</sub>)<sub>3</sub>COCONH), 5.31 (br d, *J* = 6.8 Hz, 1H x 40/100, (CH<sub>3</sub>)<sub>3</sub>COCONH), 4.90–4.40 (m, 4H, CHCH<sub>3</sub>, C<sub>6</sub>H<sub>5</sub>CH<sub>2</sub>N, and CHCH<sub>2</sub>CO<sub>2</sub>C(CH<sub>3</sub>)<sub>3</sub>), 4.20 (d, *J* = 18.2, 1H x 40/100, CH<sub>2</sub>), 4.03 (d, *J* = 15.9, 1H x 60/100, CH<sub>2</sub>), 3.97 (d, *J* = 15.9, 1H x 60/100, CH<sub>2</sub>), 3.86 (d, *J* = 18.2, 1H x 40/100, CH<sub>2</sub>), 2.85 (dd, *J* = 17.0, 4.6 Hz, 1H x 60/100, CHCH<sub>2</sub>CO<sub>2</sub>C(CH<sub>3</sub>)<sub>3</sub>), 2.82 (dd, *J* = 17.0, 4.6 Hz, 1H x 40/100, CHCH<sub>2</sub>CO<sub>2</sub>C(CH<sub>3</sub>)<sub>3</sub>), 2.71 (dd, *J* = 17.0, 4.6 Hz, 1H x 40/100, CHCH<sub>2</sub>CO<sub>2</sub>C(CH<sub>3</sub>)<sub>3</sub>), 2.69 (dd, *J* = 17.0, 4.6 Hz, 1H x 60/100, CHCH<sub>2</sub>CO<sub>2</sub>C(CH<sub>3</sub>)<sub>3</sub>), 1.46 (s, 18H x 40/100, CHCH<sub>2</sub>CO<sub>2</sub>C(CH<sub>3</sub>)<sub>3</sub> and CO<sub>2</sub>C(CH<sub>3</sub>)<sub>3</sub>), 1.45 (s, 18H x 60/100, CHCH<sub>2</sub>CO<sub>2</sub>C(CH<sub>3</sub>)<sub>3</sub> and CO<sub>2</sub>C(CH<sub>3</sub>)<sub>3</sub>), 1.43 (s, 9H x 40/100, (CH<sub>3</sub>)<sub>3</sub>COCONH), 1.43 (s, 9H x 60/100, (CH<sub>3</sub>)<sub>3</sub>COCONH), 1.35 (d, *J* = 6.6 Hz, 3H x 60/100, CHCH<sub>3</sub>), 1.35 (d, *J* = 6.8 Hz, 3H x 40/100, CHCH<sub>3</sub>). <sup>13</sup>C NMR (100 MHz, CDCl<sub>3</sub>) δ 173.9 (1C x 40/100), 173.9 (1C x 60/100), 171.1 (1C x 60/100), 170.0 (1C x 40/100), 169.4 (1C x 60/100), 169.3 (1C x 30/100), 167.8 (1C x 60/100), 167.5 (1C x 40/100), 155.6 (1C x 40/100), 155.1 (1C x 60/100), 136.1 (1C x 40/100), 135.3 (1C x 60/100), 128.6 (2C x 60/100), 128.6 (2C x 40/100), 128.2 (1C x 60/100), 128.0 (2C x 40/100), 127.6 (1C x 40/100), 127.1 (2C x 60/100),

82.3 (1C x 40/100), 82.2 (1C x 60/100), 81.5, 79.9 (1C x 40/100), 79.6 (1C x 60/100), 51.8 (1C x 60/100), 49.9 (1C x 40/100), 49.8 (1C x 40/100), 49.4 (1C x 40/100), 49.0 (1C x 60/100), 49.0 (1C x 60/100), 46.5 (1C x 40/100), 46.4 (1C x 60/100), 37.3 (1C x 60/100), 37.1 (1C x 40/100), 28.3 (3C x 60/100), 28.3 (3C x 40/100), 28.0 (3C), 27.9 (3C), 19.0 (1C x 60/100), 18.2 (1C x 40/100). IR (thin film,  $\text{cm}^{-1}$ ) 3311, 2979, 2934, 1731, 1682, 1651, 1515, 1454, 1366, 1246, 1149. HRMS (ESI) calculated for  $\text{C}_{29}\text{H}_{45}\text{N}_3\text{O}_8\text{Na}$   $[\text{M}+\text{Na}]^+$   $m/z$  586.3104, found, 586.3074.

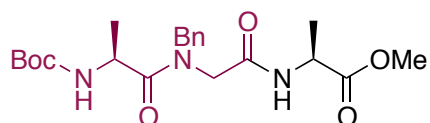

**Boc-L-Ala-Bn-Gly-L-Ala-OMe (6ce):** A flame-dried 5.0 mL screw-cap vial equipped with a magnetic stirring bar (Sm-Co) was charged with Cyclo(-Boc-L-Ala-Bn-Gly-) (**5c**, 159.2 mg, 0.50 mmol), H-L-Ala-OMe•HCl (154.7 mg, 1.5 mmol), and  $\text{Et}_3\text{N}$  (0.21 mL, 1.5 mmol). After the vial was sealed with screw-cap, the resulting mixture was stirred vigorously at 50 °C for 24 h. The reaction mixture was diluted with  $\text{CHCl}_3$  (3.0 mL), transferred onto  $\text{SiO}_2$  column by a pipette, and used vial and pipette were washed with  $\text{CHCl}_3$  (12 mL). The reaction mixture was purified directly by flash column chromatography (50–80% AcOEt in hexane) to provide the title compound **6ce** (200.3 mg, 95% yield, ratio of rotamers = 64:36) as a white solid with >99:1 dr.

$R_f$  = 0.69 (AcOEt). M.p. 31–33 °C.  $[\alpha]_D^{21} = -21.8$  ( $c$  1.01, MeOH).  $^1\text{H}$  NMR (400 MHz,  $\text{CDCl}_3$ )  $\delta$  7.64 (br d,  $J$  = 7.4 Hz, 1H x 36/100,  $\text{NH}$ ), 7.40–7.20 (m, 5H,  $\text{C}_6\text{H}_5\text{CH}_2\text{N}$ ), 6.90 (br d,  $J$  = 7.4 Hz, 1H x 64/100,  $\text{NH}$ ), 5.26 (br d,  $J$  = 6.6 Hz, 1H x 64/100,  $(\text{CH}_3)_3\text{COCONH}$ ), 5.20 (br d,  $J$  = 6.9 Hz, 1H x 36/100,  $(\text{CH}_3)_3\text{COCONH}$ ), 4.87 (d,  $J$  = 16.4 Hz, 1H x 36/100,  $\text{CH}_2$ ), 4.70–4.30 (m, 4H,  $\text{CHCH}_3$ ,  $\text{C}_6\text{H}_5\text{CH}_2\text{N}$ , and  $\text{CHCH}_3$ ), 4.07 (d,  $J$  = 17.9 Hz, 1H x 64/100,  $\text{CH}_2$ ), 3.95 (d,  $J$  = 17.9 Hz, 1H x 64/100,  $\text{CH}_2$ ), 3.83 (d,  $J$  = 16.4 Hz, 1H x 36/100,  $\text{CH}_2$ ), 3.75 (s, 3H x 64/100,  $\text{CO}_2\text{CH}_3$ ), 3.69 (s, 3H x 36/100,  $\text{CO}_2\text{CH}_3$ ), 1.42 (s, 9H x 64/100,  $(\text{CH}_3)_3\text{COCONH}$ ), 1.40 (s, 9H x 36/100,  $(\text{CH}_3)_3\text{COCONH}$ ), 1.35 (d,  $J$  = 6.6 Hz, 3H x 64/100,  $\text{CHCH}_3$ ), 1.31 (d,  $J$  = 7.3 Hz, 3H x 64/100,  $\text{CHCH}_3$ ), 1.24 (d,  $J$  = 6.9 Hz, 6H x 36/100,  $\text{CHCH}_3$ ).  $^{13}\text{C}$  NMR (100 MHz,  $\text{CDCl}_3$ )  $\delta$  174.3 (1C x 64/100), 173.6 (1C x 36/100), 173.1 (1C x 64/100), 172.8 (1C x 36/100), 168.1 (1C x 64/100), 167.9 (1C x 36/100), 156.1 (1C x 64/100), 155.5 (1C x 36/100), 136.5 (1C x 36/100), 135.6 (1C x 64/100), 129.0 (2C x 64/100), 128.6 (2C x 36/100), 128.5 (1C x 64/100), 128.0 (2C x 36/100), 127.7 (1C x 36/100), 126.9 (2C x 64/100), 80.2 (1C x 36/100), 79.9 (1C x 64/100), 52.4 (1C x

64/100), 52.2 (1C x 36/100), 51.9 (1C x 64/100), 50.9 (1C x 36/100), 50.6 (1C x 36/100), 49.6 (1C x 64/100), 48.2 (1C x 36/100), 48.0 (1C x 64/100), 47.0 (1C x 64/100), 46.3 (1C x 36/100), 28.3 (3C x 64/100), 28.2 (3C x 36/100), 18.2 (1C x 36/100), 17.9 (1C x 64/100), 17.2 (1C x 64/100), 16.9 (1C x 36/100). IR (thin film,  $\text{cm}^{-1}$ ) 3302, 2983, 2930, 1744, 1686, 1643, 1524, 1450, 1366, 1212, 1157. HRMS (ESI) calculated for  $\text{C}_{21}\text{H}_{31}\text{N}_3\text{O}_6\text{Na}$   $[\text{M}+\text{Na}]^+$   $m/z$  444.2111, found, 444.2069.

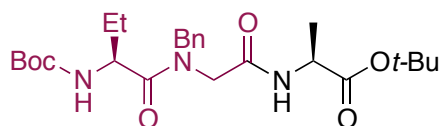

**Boc-L-Abu-Bn-Gly-L-Ala-Ot-Bu (6da):** A flame-dried 5.0 mL screw-cap vial equipped with a magnetic stirring bar (Sm-Co) was charged with Cyclo(-Boc-L-Abu-Bn-Gly-) (**5d**, 166.2 mg, 0.50 mmol) and H-L-Ala-Ot-Bu (145.2 mg, 1.0 mmol). After the vial was sealed with screw-cap, the resulting mixture was stirred vigorously at 50 °C for 48 h. The reaction mixture was diluted with  $\text{CHCl}_3$  (3.0 mL), transferred onto  $\text{SiO}_2$  column by a pipette, and used vial and pipette were washed with  $\text{CHCl}_3$  (12 mL). The reaction mixture was purified directly by flash column chromatography (10–100% AcOEt in hexane) to provide the title compound **6da** (226.9 mg, 95% yield, ratio of rotamers = 60:40) as a white solid with >99:1 dr.

$R_f$  = 0.50 (50% AcOEt in hexane). M.p. 41–42 °C.  $[\alpha]_D^{28}$  =  $-13.9$  ( $c$  1.01, MeOH).  $^1\text{H}$  NMR (400 MHz,  $\text{CDCl}_3$ )  $\delta$  7.41 (br d,  $J$  = 7.1 Hz, 1H x 40/100,  $\text{NH}$ ), 7.40–7.20 (m, 5H,  $\text{C}_6\text{H}_5\text{CH}_2\text{N}$ ), 6.76 (br d,  $J$  = 7.1 Hz, 1H x 60/100,  $\text{NH}$ ), 5.25 (br d,  $J$  = 7.6 Hz, 1H x 60/100,  $(\text{CH}_3)_3\text{COCONH}$ ), 5.11 (br d,  $J$  = 7.6 Hz, 1H x 40/100,  $(\text{CH}_3)_3\text{COCONH}$ ), 4.90–4.20 (m, 3H,  $\text{CHCH}_2\text{CH}_3$  and  $\text{C}_6\text{H}_5\text{CH}_2\text{N}$ ), 4.43 (quin,  $J$  = 7.1 Hz, 1H x 60/100,  $\text{CHCH}_3$ ), 4.30 (quin,  $J$  = 7.1 Hz, 1H x 40/100,  $\text{CHCH}_3$ ), 4.14 (d,  $J$  = 15.7 Hz, 1H x 40/100,  $\text{CH}_2$ ), 4.07 (d,  $J$  = 17.6 Hz, 1H x 60/100,  $\text{CH}_2$ ), 3.98 (d,  $J$  = 17.6 Hz, 1H x 60/100,  $\text{CH}_2$ ), 3.93 (d,  $J$  = 15.7 Hz, 1H x 40/100,  $\text{CH}_2$ ), 1.90–1.50 (m, 2H,  $\text{CHCH}_2\text{CH}_3$ ), 1.47 (s, 9H x 60/100,  $\text{CO}_2\text{C}(\text{CH}_3)_3$ ), 1.44 (s, 9H x 40/100,  $\text{CO}_2\text{C}(\text{CH}_3)_3$ ), 1.44 (s, 9H x 60/100,  $(\text{CH}_3)_3\text{COCONH}$ ), 1.43 (s, 9H x 40/100,  $(\text{CH}_3)_3\text{COCONH}$ ), 1.36 (d,  $J$  = 7.1 Hz, 3H x 60/100,  $\text{CHCH}_3$ ), 1.30 (d,  $J$  = 7.1 Hz, 3H x 40/100,  $\text{CHCH}_3$ ), 0.98 (t,  $J$  = 7.4 Hz, 3H x 40/100,  $\text{CHCH}_2\text{CH}_3$ ), 0.89 (t,  $J$  = 7.4 Hz, 3H x 60/100,  $\text{CHCH}_2\text{CH}_3$ ).  $^{13}\text{C}$  NMR (100 MHz,  $\text{CDCl}_3$ )  $\delta$  173.7 (1C x 60/100), 173.1 (1C x 40/100), 171.8 (1C x 60/100), 171.6 (1C x 40/100), 167.8 (1C x 60/100), 167.6 (1C x 40/100), 156.3 (1C x 40/100), 155.7 (1C x 60/100), 136.5 (1C

x 40/100), 135.6 (1C x 60/100), 128.9 (2C x 60/100), 128.6 (2C x 40/100), 128.5 (1C x 60/100), 128.0 (2C x 40/100), 127.6 (1C x 40/100), 127.2 (2C x 60/100), 81.8 (1C x 60/100), 81.5 (1C x 40/100), 80.1 (1C x 60/100), 79.7 (1C x 40/100), 52.2 (1C x 40/100), 52.1 (1C x 60/100), 51.6 (1C x 60/100), 50.7 (1C x 40/100), 50.2 (1C x 40/100), 49.5 (1C x 60/100), 49.0 (1C x 40/100), 48.6 (1C x 60/100), 28.3 (3C x 40/100), 28.2 (3C x 60/100), 27.9 (3C x 60/100), 27.9 (3C x 40/100), 26.0 (1C x 60/100), 25.2 (1C x 40/100), 18.3 (1C x 60/100), 17.3 (1C x 40/100), 10.0 (1C x 40/100), 9.8 (1C x 60/100). IR (thin film,  $\text{cm}^{-1}$ ) 3297, 2973, 2936, 1733, 1686, 1640, 1522, 1451, 1366, 1218, 1146. HRMS (ESI) calculated for  $\text{C}_{25}\text{H}_{39}\text{N}_3\text{O}_6\text{Na}$   $[\text{M}+\text{Na}]^+$   $m/z$  500.2737, found, 500.2750.

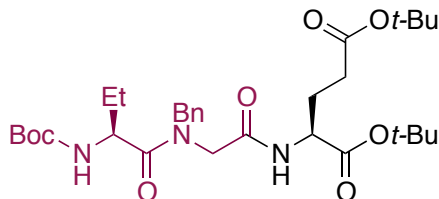

**Boc-L-Abu-Bn-Gly-L-Glu(*t*-Bu)-Ot-Bu (6db):** A flame-dried 5.0 mL screw-cap vial equipped with a magnetic stirring bar (Sm-Co) was charged with Cyclo(-Boc-L-Abu-Bn-Gly-) (**5d**, 166.2 mg, 0.50 mmol) and H-L-Glu(*t*-Bu)-Ot-Bu (259.3 mg, 1.0 mmol). After the vial was sealed with screw-cap, the resulting mixture was stirred vigorously at 50 °C for 48 h. The reaction mixture was diluted with  $\text{CHCl}_3$  (3.0 mL), transferred onto  $\text{SiO}_2$  column by a pipette, and used vial and pipette were washed with  $\text{CHCl}_3$  (12 mL). The reaction mixture was purified directly by flash column chromatography (30–40% AcOEt in hexane) to provide the title compound **6db** (245.6 mg, 83% yield, ratio of rotamers = 65:35) as a white solid with >99:1 dr.

$R_f$  = 0.20 (30% AcOEt in hexane). M.p. 28–30 °C.  $[\alpha]_D^{27} = -21.6$  ( $c$  1.02, MeOH).  $^1\text{H}$  NMR (400 MHz,  $\text{CDCl}_3$ )  $\delta$  7.54 (br d,  $J$  = 7.8 Hz, 1H x 35/100,  $\text{NH}$ ), 7.40–7.20 (m, 5H,  $\text{C}_6\text{H}_5\text{CH}_2\text{N}$ ), 6.78 (br d,  $J$  = 8.0 Hz, 1H x 65/100,  $\text{NH}$ ), 5.32 (br d,  $J$  = 7.6 Hz, 1H x 65/100,  $(\text{CH}_3)_3\text{COCONH}$ ), 5.14 (br d,  $J$  = 7.6 Hz, 1H x 35/100,  $(\text{CH}_3)_3\text{COCONH}$ ), 4.85–4.30 (m, 4H,  $\text{CHCH}_2\text{CH}_3$ ,  $\text{C}_6\text{H}_5\text{CH}_2\text{N}$ , and  $\text{CHCH}_2\text{CH}_2\text{CO}_2\text{C}(\text{CH}_3)_3$ ), 4.06 (d,  $J$  = 15.6 Hz, 1H x 35/100,  $\text{CH}_2$ ), 4.03 (s, 2H x 65/100,  $\text{CH}_2$ ), 3.95 (d,  $J$  = 15.6 Hz, 1H x 35/100,  $\text{CH}_2$ ), 2.40–2.00 (m, 3H,  $\text{CHCH}_2\text{CH}_2\text{CO}_2\text{C}(\text{CH}_3)_3$ ), 2.00–1.55 (m, 3H,  $\text{CHCH}_2\text{CH}_3$  and  $\text{CHCH}_2\text{CH}_2\text{CO}_2\text{C}(\text{CH}_3)_3$ ), 1.47 (s, 9H x 65/100,  $\text{CO}_2\text{C}(\text{CH}_3)_3$ ), 1.45 (s, 9H x 65/100,  $\text{CHCH}_2\text{CH}_2\text{CO}_2\text{C}(\text{CH}_3)_3$ ), 1.44 (s, 9H,  $(\text{CH}_3)_3\text{COCONH}$ ), 1.43 (s, 9H x 35/100,  $\text{CO}_2\text{C}(\text{CH}_3)_3$ ), 1.43 (s, 9H x 35/100,

CHCH<sub>2</sub>CH<sub>2</sub>CO<sub>2</sub>C(CH<sub>3</sub>)<sub>3</sub>), 0.98 (t, *J* = 7.5 Hz, 3H x 35/100, CHCH<sub>2</sub>CH<sub>3</sub>), 0.90 (t, *J* = 7.5 Hz, 3H x 65/100, CHCH<sub>2</sub>CH<sub>3</sub>). <sup>13</sup>C NMR (100 MHz, CDCl<sub>3</sub>) δ 173.6 (1C x 65/100), 173.0 (1C x 35/100), 172.0 (1C x 65/100), 172.0 (1C x 35/100), 170.7 (1C x 65/100), 170.5 (1C x 35/100), 168.2 (1C x 35/100), 168.2 (1C x 65/100), 156.4 (1C x 35/100), 155.5 (1C x 65/100), 136.4 (1C x 35/100), 135.5 (1C x 65/100), 128.9 (2C x 65/100), 128.7 (2C x 35/100), 128.4 (1C x 65/100), 128.0 (2C x 35/100), 127.7 (1C x 35/100), 127.3 (2C x 65/100), 82.2 (1C x 65/100), 81.9 (1C x 35/100), 80.6 (1C x 35/100), 80.6 (1C x 35/100), 80.2 (1C x 35/100), 79.7 (1C x 65/100), 52.8 (1C x 35/100), 52.2 (1C x 35/100), 52.1 (1C x 65/100), 52.1 (1C x 65/100), 51.6 (1C x 65/100), 50.5 (1C x 65/100), 5fD-0.1 (1C x 35/100), 49.5 (1C x 65/100), 31.8 (1C x 35/100), 31.4 (1C x 65/100), 28.3 (3C), 28.0 (3C), 28.0 (3C), 27.7 (1C x 65/100), 26.5 (1C x 35/100), 26.2 (1C x 65/100), 25.2 (1C x 35/100), 10.0 (1C x 35/100), 9.8 (1C x 65/100). IR (thin film, cm<sup>-1</sup>) 3202, 2975, 2931, 1730, 1693, 1645, 1518, 1453, 1366, 1246, 1148. HRMS (ESI) calculated for C<sub>31</sub>H<sub>49</sub>N<sub>3</sub>O<sub>8</sub>Na [M+Na]<sup>+</sup> *m/z* 614.3417, found, 614.3405.

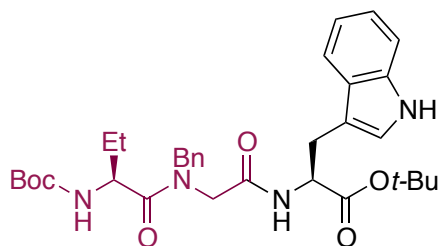

**Boc-L-Abu-Bn-Gly-L-Trp-Ot-Bu (6dc):** A flame-dried 5.0 mL screw-cap vial equipped with a magnetic stirring bar (Nd) was charged with Cyclo(-Boc-L-Abu-Bn-Gly-) (**5d**, 166.2 mg, 0.50 mmol) and H-L-Trp-Ot-Bu (260.3 mg, 1.0 mmol). After the vial was sealed with screw-cap, the resulting mixture was stirred vigorously at 50 °C for 48 h. The reaction mixture was diluted with CHCl<sub>3</sub> (3.0 mL), transferred onto SiO<sub>2</sub> column by a pipette, and used vial and pipette were washed with CHCl<sub>3</sub> (12 mL). The reaction mixture was purified directly by flash column chromatography (30–80% AcOEt in hexane) to provide the title compound **6dc** (272.7 mg, 92% yield, ratio of rotamers = 60:40) as a white solid with >99:1 dr.

*R<sub>f</sub>* = 0.47 (50% AcOEt in hexane). M.p. 60–62 °C. [*α*]<sub>D</sub><sup>26</sup> = +3.6 (*c* 1.12, MeOH). <sup>1</sup>H NMR (400 MHz, CDCl<sub>3</sub>) δ 8.41 (br s, 1H x 60/100, CHCH<sub>2</sub>CCHNHCCHCHCHCHC), 8.37 (br s, 1H x 40/100, CHCH<sub>2</sub>CCHNHCCHCHCHCHC), 7.62 (br d, *J* = 7.8 Hz, 1H x 40/100, NH), 7.58 (br d, *J* = 7.8 Hz, 1H x 60/100, NH), 7.40–6.90 (m, 9H + 1H x 40/100, C<sub>6</sub>H<sub>5</sub>CH<sub>2</sub>N and

CHCH<sub>2</sub>CCHNHCCCHCHCHCHC), 6.60 (br d,  $J = 7.8$  Hz, 1H x 60/100, CHCH<sub>2</sub>CCHNHCCCHCHCHCHC), 5.34 (br d,  $J = 8.0$  Hz, 1H x 60/100, (CH<sub>3</sub>)<sub>3</sub>COCONH), 5.23 (br d,  $J = 7.3$  Hz, 1H x 40/100, (CH<sub>3</sub>)<sub>3</sub>COCONH), 4.85–3.60 (m, 6H, CHCH<sub>2</sub>CH<sub>3</sub>, C<sub>6</sub>H<sub>5</sub>CH<sub>2</sub>N, and CH<sub>2</sub>), 3.41 (d,  $J = 14.7, 5.0$  Hz, 1H x 40/100, CHCH<sub>2</sub>CCHNHCCCHCHCHCHC), 3.30 (d,  $J = 14.7, 5.5$  Hz, 1H x 60/100, CHCH<sub>2</sub>CCHNHCCCHCHCHCHC), 3.24 (d,  $J = 14.7, 6.4$  Hz, 1H x 60/100, CHCH<sub>2</sub>CCHNHCCCHCHCHCHC), 3.18 (d,  $J = 14.7, 8.9$  Hz, 1H x 40/100, CHCH<sub>2</sub>CCHNHCCCHCHCHCHC), 1.80–1.30 (m, 2H, CHCH<sub>2</sub>CH<sub>3</sub>), 1.47 (s, 9H x 40/100, CO<sub>2</sub>C(CH<sub>3</sub>)<sub>3</sub>), 1.44 (s, 9H x 60/100, CO<sub>2</sub>C(CH<sub>3</sub>)<sub>3</sub>), 1.41 (s, 9H x 40/100, (CH<sub>3</sub>)<sub>3</sub>COCONH), 1.37 (s, 9H x 60/100, (CH<sub>3</sub>)<sub>3</sub>COCONH), 0.90 (t,  $J = 7.3$  Hz, 3H x 40/100, CHCH<sub>2</sub>CH<sub>3</sub>), 0.84 (t,  $J = 7.3$  Hz, 3H x 60/100, CHCH<sub>2</sub>CH<sub>3</sub>). <sup>13</sup>C NMR (100 MHz, CDCl<sub>3</sub>)  $\delta$  173.5 (1C x 60/100), 172.9 (1C x 40/100), 170.8 (1C x 60/100), 170.6 (1C x 40/100), 167.8 (1C x 60/100), 167.6 (1C x 40/100), 156.2 (1C x 40/100), 155.5 (1C x 60/100), 136.3 (1C x 40/100), 136.1 (1C x 40/100), 136.0 (1C x 60/100), 135.4 (1C x 60/100), 128.9 (2C x 60/100), 128.5 (2C x 40/100), 128.2 (1C x 60/100), 128.0 (2C x 40/100), 127.8 (1C x 40/100), 127.6 (1C x 40/100), 127.5 (1C x 60/100), 127.1 (2C x 60/100), 122.9, 122.1 (1C x 40/100), 122.0 (1C x 60/100), 119.6 (1C x 40/100), 119.4 (1C x 60/100), 118.9 (1C x 60/100), 118.7 (1C x 40/100), 111.2 (1C x 40/100), 111.1 (1C x 60/100), 110.8 (1C x 40/100), 110.1 (1C x 60/100), 82.1 (1C x 60/100), 81.8 (1C x 40/100), 80.1 (1C x 60/100), 79.7 (1C x 40/100), 53.7 (1C x 40/100), 53.1 (1C x 40/100), 52.1 (1C x 40/100), 51.8 (1C x 60/100), 51.5 (1C x 40/100), 49.8 (1C x 60/100), 49.2 (1C x 40/100), 49.1 (1C x 60/100), 28.4 (3C x 40/100), 28.3 (3C x 60/100), 27.9 (3C x 40/100), 27.9 (3C x 60/100), 27.2 (1C x 40/100), 27.1 (1C x 60/100), 26.3 (1C x 60/100), 25.3 (1C x 40/100), 9.9 (1C x 40/100), 9.7 (1C x 60/100). IR (thin film, cm<sup>-1</sup>) 3299, 2973, 2931, 1730, 1693, 1640, 1509, 1453, 1365, 1240, 1152. HRMS (ESI) calculated for C<sub>33</sub>H<sub>44</sub>N<sub>4</sub>O<sub>6</sub>Na [M+Na]<sup>+</sup>  $m/z$  615.3159, found, 615.3139.

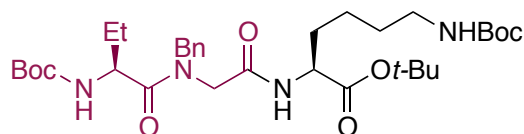

**Boc-L-Abu-Bn-Gly-L-Lys(Boc)-Ot-Bu (6dd):** A flame-dried 5.0 mL screw-cap vial equipped with a magnetic stirring bar (Sm-Co) was charged with Cyclo(-Boc-L-Abu-Bn-Gly-) (**5d**, 166.2 mg, 0.50 mmol) and H-L-Lys(Boc)-Ot-Bu (302.4 mg, 1.0 mmol). After the vial was sealed with



screw-cap, the resulting mixture was stirred vigorously at 50 °C for 48 h. The reaction mixture was diluted with CHCl<sub>3</sub> (3.0 mL), transferred onto SiO<sub>2</sub> column by a pipette, and used vial and pipette were washed with CHCl<sub>3</sub> (12 mL). The reaction mixture was purified directly by flash column chromatography (30–100% AcOEt in hexane) to provide the title compound **6dd** (288.7 mg, 91% yield, ratio of rotamers = 67:33) as a white solid with >99:1 dr.

$R_f$  = 0.38 (50% AcOEt in hexane). M.p. 45–46 °C.  $[\alpha]_D^{26} = -20.4$  ( $c$  1.08, MeOH). <sup>1</sup>H NMR (400 MHz, CDCl<sub>3</sub>)  $\delta$  7.40–7.20 (m, 5H + 1H x 33/100, C<sub>6</sub>H<sub>5</sub>CH<sub>2</sub>N and NH), 6.73 (br d,  $J$  = 6.2 Hz, 1H x 67/100, NH), 5.45–4.25 (m, 8H, (CH<sub>3</sub>)<sub>3</sub>COCONH, CHCH<sub>2</sub>CH<sub>3</sub>, C<sub>6</sub>H<sub>5</sub>CH<sub>2</sub>N, and CHCH<sub>2</sub>CH<sub>2</sub>CH<sub>2</sub>CH<sub>2</sub>NHCO<sub>2</sub>C(CH<sub>3</sub>)<sub>3</sub>), 4.10–3.80 (m, 2H, CH<sub>2</sub>), 3.20–3.00 (m, 2H, CHCH<sub>2</sub>CH<sub>2</sub>CH<sub>2</sub>CH<sub>2</sub>NHCO<sub>2</sub>C(CH<sub>3</sub>)<sub>3</sub>), 1.90–1.25 (m, 8H, CHCH<sub>2</sub>CH<sub>3</sub> and CHCH<sub>2</sub>CH<sub>2</sub>CH<sub>2</sub>CH<sub>2</sub>NHCO<sub>2</sub>C(CH<sub>3</sub>)<sub>3</sub>), 1.46 (s, 9H, CO<sub>2</sub>C(CH<sub>3</sub>)<sub>3</sub>), 1.45 (s, 9H x 33/100, CHCH<sub>2</sub>CH<sub>2</sub>CH<sub>2</sub>CH<sub>2</sub>NHCO<sub>2</sub>C(CH<sub>3</sub>)<sub>3</sub>), 1.44 (s, 9H x 67/100, CHCH<sub>2</sub>CH<sub>2</sub>CH<sub>2</sub>CH<sub>2</sub>NHCO<sub>2</sub>C(CH<sub>3</sub>)<sub>3</sub>), 1.43 (s, 9H x 33/100, (CH<sub>3</sub>)<sub>3</sub>COCONH), 1.43 (s, 9H x 67/100, (CH<sub>3</sub>)<sub>3</sub>COCONH), 0.97 (t,  $J$  = 7.3 Hz, 3H x 33/100, CHCH<sub>2</sub>CH<sub>3</sub>), 0.89 (t,  $J$  = 7.3 Hz, 3H x 67/100, CHCH<sub>2</sub>CH<sub>3</sub>). <sup>13</sup>C NMR (100 MHz, CDCl<sub>3</sub>)  $\delta$  173.8 (1C x 67/100), 173.1 (1C x 33/100), 171.0 (1C x 67/100), 171.0 (1C x 33/100), 167.9 (1C x 33/100), 167.9 (1C x 67/100), 156.2 (1C x 33/100), 156.0 (1C x 67/100), 155.6 (1C x 67/100), 155.5 (1C x 33/100), 136.4 (1C x 33/100), 135.6 (1C x 67/100), 128.9 (2C x 67/100), 128.6 (2C x 33/100), 128.4 (1C x 67/100), 128.0 (2C x 33/100), 127.6 (1C x 33/100), 127.3 (2C x 67/100), 82.0 (1C x 67/100), 81.8 (1C x 33/100), 80.0 (1C x 33/100), 79.7 (1C x 67/100), 79.0, 53.1 (1C x 67/100), 52.4, 52.1 (1C x 33/100), 51.6 (1C x 67/100), 50.4 (1C x 33/100), 50.0 (1C x 33/100), 49.8 (1C x 67/100), 40.2 (1C x 33/100), 40.0 (1C x 67/100), 31.8 (1C x 67/100), 31.2 (1C x 33/100), 29.5 (1C x 33/100), 29.3 (1C x 67/100), 28.4 (3C x 67/100), 28.4 (3C x 33/100), 28.3 (3C x 67/100), 28.2 (3C x 33/100), 28.0 (3C), 26.1 (1C x 67/100), 25.4 (1C x 33/100), 22.8 (1C x 33/100), 22.1 (1C x 67/100), 10.0 (1C x 33/100), 9.8 (1C x 67/100). IR (thin film, cm<sup>-1</sup>) 3335, 2977, 2934, 1687, 1646, 1517, 1453, 1366, 1243, 1156, 1079. HRMS (ESI) calculated for C<sub>33</sub>H<sub>54</sub>N<sub>4</sub>O<sub>8</sub>Na [M+Na]<sup>+</sup>  $m/z$  657.3839, found, 657.3842.

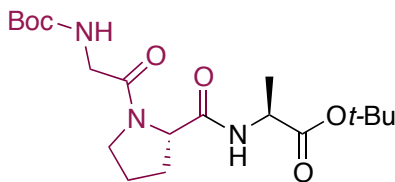

**Boc-Gly-L-Pro-L-Ala-Ot-Bu (6ea):** A flame-dried 5.0 mL screw-cap vial equipped with a magnetic stirring bar (Sm-Co) was charged with Cyclo(-Boc-Gly-L-Pro-) (**5e**, 127.1 mg, 0.50 mmol) and H-L-Ala-Ot-Bu (145.2 mg, 1.0 mmol). After the vial was sealed with screw-cap, the resulting mixture was stirred vigorously at 50 °C for 12 h. The reaction mixture was diluted with CHCl<sub>3</sub> (3.0 mL), transferred onto SiO<sub>2</sub> column by a pipette, and used vial and pipette were washed with CHCl<sub>3</sub> (12 mL). The reaction mixture was purified directly by flash column chromatography (1–10% MeOH in CHCl<sub>3</sub>) to provide the title compound **6ea** (193.8 mg, 97% yield, ratio of rotamers = 90:10) as a white solid with >99:1 dr.

$R_f$  = 0.42 (10% MeOH in CHCl<sub>3</sub>). M.p. 180–183 °C.  $[\alpha]_D^{27} = -130.5$  ( $c$  1.05, MeOH). <sup>1</sup>H NMR (400 MHz, CDCl<sub>3</sub>)  $\delta$  7.11 (br d,  $J$  = 7.3 Hz, 1H x 90/100, NH), 6.78 (br d,  $J$  = 7.3 Hz, 1H x 10/100, NH), 5.48 (br dd,  $J$  = 4.8, 4.1 Hz, 1H x 90/100, (CH<sub>3</sub>)<sub>3</sub>COCONH), 5.28 (br dd,  $J$  = 4.8, 4.1 Hz, 1H x 10/100, (CH<sub>3</sub>)<sub>3</sub>COCONH), 4.55 (dd,  $J$  = 8.1, 2.2 Hz, 1H, CHCH<sub>2</sub>CH<sub>2</sub>CH<sub>2</sub>), 4.44 (quin,  $J$  = 7.3 Hz, 1H x 10/100, CHCH<sub>3</sub>), 4.40 (quin,  $J$  = 7.3 Hz, 1H x 90/100, CHCH<sub>3</sub>), 4.00 (dd,  $J$  = 17.3, 4.8 Hz, 1H, CH<sub>2</sub>), 3.91 (dd,  $J$  = 17.3, 4.1 Hz, 1H, CH<sub>2</sub>), 3.80–3.30 (m, 2H, CHCH<sub>2</sub>CH<sub>2</sub>CH<sub>2</sub>), 2.40–1.85 (m, 4H, CHCH<sub>2</sub>CH<sub>2</sub>CH<sub>2</sub>), 1.46 (s, 9H x 90/100, CO<sub>2</sub>C(CH<sub>3</sub>)<sub>3</sub>), 1.45 (s, 9H x 10/100, CO<sub>2</sub>C(CH<sub>3</sub>)<sub>3</sub>), 1.45 (s, 9H x 90/100, (CH<sub>3</sub>)<sub>3</sub>COCONH), 1.43 (s, 9H x 10/100, (CH<sub>3</sub>)<sub>3</sub>COCONH), 1.39 (d,  $J$  = 7.3 Hz, 3H x 10/100, CHCH<sub>3</sub>), 1.36 (d,  $J$  = 7.3 Hz, 3H x 90/100, CHCH<sub>3</sub>). <sup>13</sup>C NMR (100 MHz, CDCl<sub>3</sub>)  $\delta$  171.9 (1C x 90/100), 171.6 (1C x 10/100), 170.5 (1C x 10/100), 170.2 (1C x 90/100), 168.4 (1C x 10/100), 168.4 (1C x 90/100), 155.9 (1C x 10/100), 155.7 (1C x 90/100), 82.1 (1C x 10/100), 81.7 (1C x 90/100), 79.6, 60.1 (1C x 10/100), 60.0 (1C x 90/100), 48.8 (1C x 90/100), 48.7 (1C x 10/100), 47.1 (1C x 10/100), 46.2 (1C x 90/100), 43.0 (1C x 90/100), 42.9 (1C x 10/100), 31.9 (1C x 10/100), 28.3 (3C), 27.9 (3C), 27.7 (1C x 90/100), 24.8 (1C x 90/100), 22.3 (1C x 10/100), 18.2 (1C x 90/100), 18.0 (1C x 10/100). IR (thin film, cm<sup>-1</sup>) 3351, 2968, 1720, 1703, 1678, 1635, 1531, 1450, 1366, 1220, 1148. HRMS (ESI) calculated for C<sub>19</sub>H<sub>33</sub>N<sub>3</sub>O<sub>6</sub>Na [M+Na]<sup>+</sup>  $m/z$  422.2267, found, 422.2246.

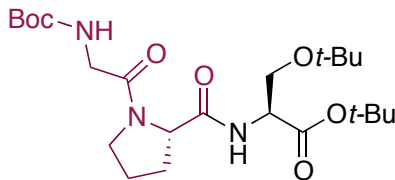

**Boc-Gly-L-Pro-L-Ser(*t*-Bu)-Ot-Bu (6eb, CAS No. 23828-63-9)<sup>11</sup>:** A flame-dried 5.0 mL screw-cap vial equipped with a magnetic stirring bar (Sm-Co) was charged with Cyclo(-Boc-Gly-L-Pro-) (**5e**, 127.1 mg, 0.50 mmol) and H-L-Ser(*t*-Bu)-Ot-Bu (217.3 mg, 1.0 mmol). After the vial was sealed with screw-cap, the resulting mixture was stirred vigorously at 50 °C for 24 h. The reaction mixture was diluted with CHCl<sub>3</sub> (3.0 mL), transferred onto SiO<sub>2</sub> column by a pipette, and used vial and pipette were washed with CHCl<sub>3</sub> (12 mL). The reaction mixture was purified directly by flash column chromatography (10–100% AcOEt in hexane) to provide the title compound **6eb** (235.1 mg, >99% yield, ratio of rotamers = 84:16) as a white solid with >99:1 dr. *R*<sub>f</sub> = 0.58 (AcOEt). M.p. 69–70 °C. <sup>1</sup>H NMR (400 MHz, CDCl<sub>3</sub>) δ 7.07 (br d, *J* = 8.1 Hz, 1H x 86/100, NH), 6.61 (br d, *J* = 8.5 Hz, 1H x 14/100, NH), 5.47 (br dd, *J* = 4.7, 4.1 Hz, 1H x 86/100, (CH<sub>3</sub>)<sub>3</sub>COCONH), 5.47–5.35 (m, 1H x 14/100, (CH<sub>3</sub>)<sub>3</sub>COCONH), 4.65–4.55 (m, 1H, CHCH<sub>2</sub>CH<sub>2</sub>CH<sub>2</sub>), 4.53 (dt, *J* = 8.1, 3.0 Hz, 1H x 86/100, CHCH<sub>2</sub>OC(CH<sub>3</sub>)<sub>3</sub>), 4.40–4.30 (m, 1H x 14/100, CHCH<sub>2</sub>OC(CH<sub>3</sub>)<sub>3</sub>), 4.10–3.85 (m, 2H x 14/100, CH<sub>2</sub>), 4.00 (dd, *J* = 17.2, 4.7 Hz, 1H x 86/100, CH<sub>2</sub>), 3.92 (dd, *J* = 17.2, 4.1 Hz, 1H x 86/100, CH<sub>2</sub>), 3.85–3.30 (m, 4H x 128/400, CHCH<sub>2</sub>CH<sub>2</sub>CH<sub>2</sub> and CHCH<sub>2</sub>OC(CH<sub>3</sub>)<sub>3</sub>), 3.79 (dd, *J* = 8.7, 3.0 Hz, 1H x 14/100, CHCH<sub>2</sub>OC(CH<sub>3</sub>)<sub>3</sub>), 3.76 (dd, *J* = 8.7, 3.0 Hz, 1H x 86/100, CHCH<sub>2</sub>OC(CH<sub>3</sub>)<sub>3</sub>), 3.51 (dd, *J* = 8.7, 3.0 Hz, 1H x 86/100, CHCH<sub>2</sub>OC(CH<sub>3</sub>)<sub>3</sub>), 3.41 (dt, *J* = 9.2, 7.1 Hz, 1H x 86/100, CHCH<sub>2</sub>CH<sub>2</sub>CH<sub>2</sub>), 2.40–1.85 (m, 4H, CHCH<sub>2</sub>CH<sub>2</sub>CH<sub>2</sub>), 1.46 (s, 9H x 86/100, CO<sub>2</sub>C(CH<sub>3</sub>)<sub>3</sub>), 1.46 (s, 9H x 14/100, CO<sub>2</sub>C(CH<sub>3</sub>)<sub>3</sub>), 1.44 (s, 9H x 86/100, (CH<sub>3</sub>)<sub>3</sub>COCONH), 1.44 (s, 9H x 14/100, (CH<sub>3</sub>)<sub>3</sub>COCONH), 1.14 (s, 9H, CHCH<sub>2</sub>OC(CH<sub>3</sub>)<sub>3</sub>). <sup>13</sup>C NMR (100 MHz, CDCl<sub>3</sub>) δ 170.5, 169.3 (1C x 86/100), 168.9 (1C x 14/100), 168.6 (1C x 14/100), 168.0 (1C x 86/100), 155.7, 82.2 (1C x 14/100), 81.7 (1C x 86/100), 79.5, 73.2 (1C x 14/100), 73.0 (1C x 86/100), 61.9 (1C x 86/100), 61.9 (1C x 14/100), 60.4 (1C x 14/100), 60.0 (1C x 86/100), 53.3 (1C x 86/100), 53.0 (1C x 14/100), 47.0 (1C x 14/100), 46.1 (1C x 86/100), 43.0, 32.0 (1C x 14/100), 28.3 (3C), 28.0 (1C x 86/100), 28.0 (3C), 27.3 (3C), 24.7 (1C x 86/100), 22.2 (1C x 14/100). IR (thin film, cm<sup>-1</sup>) 3274, 2977, 1749, 1719, 1702, 1665, 1652, 1636, 1546, 1453, 1165.

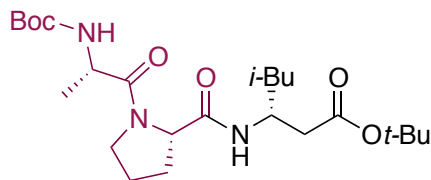

**Boc-L-Ala-L-Pro-D-β-HoLeu-Ot-Bu (6f):** A flame-dried 5.0 mL screw-cap vial equipped with a magnetic stirring bar (Sm-Co) was charged with Cyclo(-Boc-L-Ala-L-Pro-) (**5f**, 134.2 mg, 0.50 mmol) and H-D-β-HoLeu-Ot-Bu (201.3 mg, 1.0 mmol). After the vial was sealed with screw-cap, the resulting mixture was stirred vigorously at 50 °C for 12 h. The reaction mixture was diluted with CHCl<sub>3</sub> (3.0 mL), transferred onto SiO<sub>2</sub> column by a pipette, and used vial and pipette were washed with CHCl<sub>3</sub> (12 mL). The reaction mixture was purified directly by flash column chromatography (50–100% AcOEt in hexane) to provide the title compound **6fa** (225.4 mg, 96% yield, ratio of rotamers = 85:15) as a white solid with >99:1 dr.

$R_f$  = 0.64 (AcOEt). M.p. 27–28 °C.  $[\alpha]_D^{20}$  = –67.9 ( $c$  1.09, MeOH). <sup>1</sup>H NMR (400 MHz, CDCl<sub>3</sub>)  $\delta$  7.21 (br d,  $J$  = 8.7 Hz, 1H x 15/100, NH), 6.92 (br d,  $J$  = 9.2 Hz, 1H x 85/100, NH), 5.35 (br d,  $J$  = 6.9 Hz, 1H x 85/100, (CH<sub>3</sub>)<sub>3</sub>COCONH), 5.12 (br d,  $J$  = 6.9 Hz, 1H x 15/100, (CH<sub>3</sub>)<sub>3</sub>COCONH), 4.56 (br dd,  $J$  = 8.0. 2.5 Hz, 1H, CHCH<sub>2</sub>CH<sub>2</sub>CH<sub>2</sub>), 4.48 (quin,  $J$  = 6.9 Hz, 1H x 85/100, CHCH<sub>3</sub>), 4.45–4.30 (m, 1H x 15/100, CHCH<sub>3</sub>), 4.30–4.20 (m, 1H x 85/100, CH(CH<sub>2</sub>CH(CH<sub>3</sub>)<sub>2</sub>)CH<sub>2</sub>), 4.15–4.00 (m, 1H x 15/100, CH(CH<sub>2</sub>CH(CH<sub>3</sub>)<sub>2</sub>)CH<sub>2</sub>), 3.70–3.50 (m, 2H, CHCH<sub>2</sub>CH<sub>2</sub>CH), 2.40–1.80 (m, 4H, CHCH<sub>2</sub>CHCH<sub>2</sub>), 2.34 (d,  $J$  = 5.5 Hz, 2H, CH(CH<sub>2</sub>CH(CH<sub>3</sub>)<sub>2</sub>)CH), 1.70–1.20 (m, 3H, CH(CH<sub>2</sub>CH(CH<sub>3</sub>)<sub>2</sub>)CH<sub>2</sub>), 1.43 (s, 18H, (CH<sub>3</sub>)<sub>3</sub>COCONH and CO<sub>2</sub>C(CH)<sub>3</sub>), 1.38 (d,  $J$  = 6.9 Hz, 3H, CHCH<sub>3</sub>), 0.92 (d,  $J$  = 6.4 Hz, 3H, CH(CH<sub>2</sub>CH(CH)<sub>2</sub>)CH<sub>2</sub>), 0.90 (d,  $J$  = 6.6 Hz, 3H, CH(CH<sub>2</sub>CH(CH)<sub>2</sub>)CH<sub>2</sub>). <sup>13</sup>C NMR (100 MHz, CDCl<sub>3</sub>)  $\delta$  173.0 (1C x 85/100), 172.3 (1C x 15/100), 170.9 (1C x 85/100), 170.6 (1C x 15/100), 170.0 (1C x 85/100), 169.6 (1C x 15/100), 155.5 (1C x 15/100), 155.1 (1C x 85/100), 80.8 (1C x 85/100), 80.7 (1C x 15/100), 79.9 (1C x 15/100) 79.6 (1C x 85/100), 61.0 (1C x 15/100), 60.0 (1C x 85/100), 48.7 (1C x 15/100), 47.7 (1C x 85/100), 47.0 (1C x 85/100), 46.6 (1C x 15/100), 45.2 (1C x 15/100), 44.4 (1C x 85/100), 43.3 (1C x 85/100), 42.8 (1C x 15/100), 40.5, 32.5 (1C x 15/100), 28.3 (3C), 28.0 (3C), 27.5 (1C x 85/100), 25.0 (1C x 15/100), 24.9 (2C x 85/100), 23.0 (1C x 85/100), 22.7 (1C x 15/100), 22.3 (1C x 15/100), 22.1 (1C x 85/100), 21.8 (1C x 15/100), 18.6 (1C x 85/100), 17.3 (1C x 15/100). IR (thin film, cm<sup>–1</sup>) 3341, 2977, 1713, 1694, 1682, 1644,

1519, 1448, 1366, 1249, 1157. HRMS (ESI) calculated for  $C_{24}H_{43}N_3O_6Na$   $[M+Na]^+$   $m/z$  492.3050, found, 492.3007.

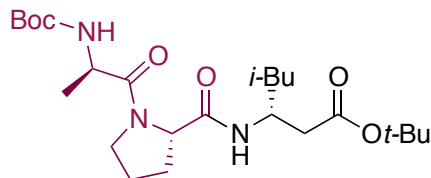

**Boc-D-Ala-L-Pro-D-β-HoLeu-Ot-Bu (6g):** A flame-dried 5.0 mL screw-cap vial equipped with a magnetic stirring bar (Sm-Co) was charged with Cyclo(-Boc-D-Ala-L-Pro-) (**5g**, 134.2 mg, 0.50 mmol) and H-D-β-HoLeu-Ot-Bu (201.3 mg, 1.0 mmol). After the vial was sealed with screw-cap, the resulting mixture was stirred vigorously at 50 °C for 12 h. The reaction mixture was diluted with  $CHCl_3$  (3.0 mL), transferred onto  $SiO_2$  column by a pipette, and used vial and pipette were washed with  $CHCl_3$  (12 mL). The reaction mixture was purified directly by flash column chromatography (30–100% AcOEt in hexane) to provide the title compound **6g** (230.1 mg, 98% yield, ratio of rotamers = 91:9) as a white solid with >99:1 dr.

$R_f$  = 0.58 (AcOEt). M.p. 50–51 °C.  $[\alpha]_D^{25} = -17.0$  ( $c$  1.06, MeOH).  $^1H$  NMR (400 MHz,  $CDCl_3$ )  $\delta$  7.03 (br d,  $J$  = 8.8 Hz, 1H x 91/100,  $NH$ ), 6.68 (br d,  $J$  = 8.8 Hz, 1H x 9/100,  $NH$ ), 5.53 (br d,  $J$  = 6.6 Hz, 1H x 91/100,  $(CH_3)_3COCONH$ ), 5.16 (br d,  $J$  = 6.6 Hz, 1H x 9/100,  $(CH_3)_3COCONH$ ), 4.74 (br dd,  $J$  = 8.0. 1.4 Hz, 1H x 9/100,  $CHCH_2CH_2CH_2$ ), 4.55 (br dd,  $J$  = 8.0. 1.4 Hz, 1H x 91/100,  $CHCH_2CH_2CH_2$ ), 4.41 (quin,  $J$  = 6.6 Hz, 1H,  $CHCH_3$ ), 4.35–4.20 (m, 1H,  $CH(CH_2CH(CH_3)_2)CH_2$ ), 3.72 (ddd,  $J$  = 9.6, 8.5, 3.0 Hz, 1H,  $CHCH_2CH_2CH_2$ ), 3.70–3.50 (m, 1H x 9/100,  $CHCH_2CH_2CH_2$ ), 3.45 (td,  $J$  = 9.6, 7.2 Hz, 1H x 91/100,  $CHCH_2CH_2CH_2$ ), 2.50–2.25 (m, 2H x 9/100,  $CH(CH_2CH(CH_3)_2)CH_2$ ), 2.40 (dd,  $J$  = 14.7, 5.5 Hz, 1H x 91/100,  $CH(CH_2CH(CH_3)_2)CH_2$ ), 2.32 (dd,  $J$  = 14.7, 6.9 Hz, 1H x 91/100,  $CH(CH_2CH(CH_3)_2)CH_2$ ), 2.20–1.20 (m, 7H,  $CHCH_2CH_2CH_2$  and  $CH(CH_2CH(CH_3)_2)CH_2$ ), 1.44 (s, 9H,  $CO_2C(CH_3)_3$ ), 1.43 (s, 9H,  $(CH_3)_3COCONH$ ), 1.32 (d,  $J$  = 6.6 Hz, 3H,  $CHCH_3$ ), 0.92 (d,  $J$  = 6.8 Hz, 3H,  $CH(CH_2CH(CH_3)_2)CH_2$ ), 0.91 (d,  $J$  = 6.8 Hz, 3H,  $CH(CH_2CH(CH_3)_2)CH_2$ ).  $^{13}C$  NMR (100 MHz,  $CDCl_3$ )  $\delta$  172.9 (1C x 9/100), 172.2 (1C x 91/100), 171.0 (1C x 9/100), 170.8 (1C x 91/100), 169.9 (1C x 91/100), 169.8 (1C x 9/100), 155.3 (1C x 91/100), 155.3 (1C x 9/100), 81.2 (1C x 9/100), 80.6 (1C x 91/100), 79.6, 61.0 (1C x 9/100), 60.2 (1C x 91/100), 48.1 (1C x 91/100), 47.5 (1C x 9/100), 46.8, 44.9 (1C x 91/100), 44.5 (1C x 9/100), 43.7 (1C x 91/100), 42.9 (1C x

9/100), 41.0 (1C x 91/100), 39.5 (1C x 9/100), 32.1 (1C x 9/100), 28.4 (3C x 91/100), 28.3 (3C x 9/100), 28.0 (3C), 27.6 (1C x 91/100), 25.1 (1C x 9/100), 24.8 (1C x 91/100), 24.5, 22.9 (1C x 91/100), 22.7 (1C x 9/100), 22.4 (1C x 9/100), 22.1 (1C x 91/100), 18.6 (1C x 9/100), 17.6 (1C x 91/100). IR (thin film,  $\text{cm}^{-1}$ ) 3334, 2977, 1737, 1681, 1631, 1522, 1452, 1367, 1249, 1159, 748. HRMS (ESI) calculated for  $\text{C}_{24}\text{H}_{43}\text{N}_3\text{O}_6\text{Na}$   $[\text{M}+\text{Na}]^+$   $m/z$  492.3050, found, 492.3061.

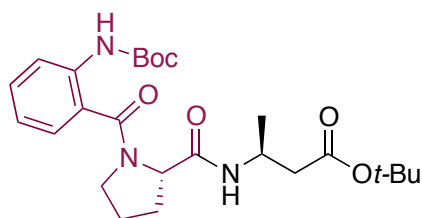

**Boc-Abz-L-Pro-L-β-HoAla-Ot-Bu (6h):** A flame-dried 5.0 mL screw-cap vial equipped with a magnetic stirring bar (Sm-Co) was charged with Cyclo(-Boc-Abz-L-Pro-) (**5h**, 158.2 mg, 0.50 mmol) and H-L-β-HoAla-Ot-Bu (159.2 mg, 1.0 mmol). After the vial was sealed with screw-cap, the resulting mixture was stirred vigorously at room temperature for 12 h. The reaction mixture was diluted with  $\text{CHCl}_3$  (3.0 mL), transferred onto  $\text{SiO}_2$  column by a pipette, and used vial and pipette were washed with  $\text{CHCl}_3$  (12 mL). The reaction mixture was purified directly by flash column chromatography (50–80% AcOEt in hexane) to provide the title compound **6h** (178.3 mg, 75% yield, ratio of rotamers = 56:44) as a white solid with >99:1 dr.

$R_f$  = 0.71 (AcOEt). M.p. 47–48 °C.  $[\alpha]_D^{24}$  = +6.0 ( $c$  1.00, MeOH).  $^1\text{H}$  NMR (400 MHz,  $\text{CDCl}_3$ )  $\delta$  8.44 (br s, 1H,  $(\text{CH}_3)_3\text{COCONH}$ ), 8.15 (br d,  $J$  = 8.2 Hz, 1H,  $\text{NH}$ ), 7.50–6.90 (m, 4H,  $\text{CCHCHCHCHC}$ ), 4.71 (br t,  $J$  = 6.6 Hz, 1H x 44/100,  $\text{CHCH}_2\text{CH}_2\text{CH}_2$ ), 4.65 (br t,  $J$  = 7.0 Hz, 1H x 56/100,  $\text{CHCH}_2\text{CH}_2\text{CH}_2$ ), 4.40–4.20 (m, 1H,  $\text{CH}(\text{CH}_3)\text{CH}_2$ ), 3.70–3.40 (m, 2H,  $\text{CH}(\text{CH}_3)\text{CH}_2$ ), 2.50–1.75 (m, 6H,  $\text{CHCH}_2\text{CH}_2\text{CH}_2$ ), 1.50 (s, 9H,  $\text{CO}_2\text{C}(\text{CH}_3)_3$ ), 1.43 (s, 9H x 44/100,  $(\text{CH}_3)_3\text{COCONH}$ ), 1.43 (s, 9H x 56/100,  $(\text{CH}_3)_3\text{COCONH}$ ), 1.24 (d,  $J$  = 6.5 Hz, 3H x 56/100,  $\text{CH}(\text{CH}_3)\text{CH}_2$ ), 1.23 (d,  $J$  = 6.5 Hz, 3H x 44/100,  $\text{CH}(\text{CH}_3)\text{CH}_2$ ).  $^{13}\text{C}$  NMR (100 MHz,  $\text{CDCl}_3$ )  $\delta$  171.0, 170.3 (1C x 56/100), 170.2 (1C x 44/100), 169.8 (1C x 44/100), 169.8 (1C x 56/100), 153.0, 137.4 (1C x 56/100), 137.3 (1C x 44/100), 131.1, 127.7, 123.7 (1C x 44/100), 123.5 (1C x 56/100), 121.7 (1C x 44/100), 121.7 (1C x 56/100), 120.5 (1C x 44/100), 120.4 (1C x 56/100), 81.1, 80.4, 60.3 (1C x 56/100), 60.1 (1C x 44/100), 50.6 (1C x 56/100), 50.5 (1C x 44/100), 42.4, 41.1 (1C x 44/100), 41.1 (1C x 56/100), 28.5 (1C x 56/100), 28.3 (3C), 28.1 (1C x 44/100), 28.0 (3C), 25.4 (1C x 56/100), 25.3 (1C x 44/100), 19.9 (1C x 56/100), 19.9 (1C x 44/100).

44/100). IR (thin film,  $\text{cm}^{-1}$ ) 2981, 2969, 1723, 1666, 1620, 1588, 1522, 1411, 1365, 1235, 1152. HRMS (ESI) calculated for  $\text{C}_{25}\text{H}_{37}\text{N}_3\text{O}_6\text{Na}$   $[\text{M}+\text{Na}]^+$   $m/z$  498.2580, found, 498.2579.

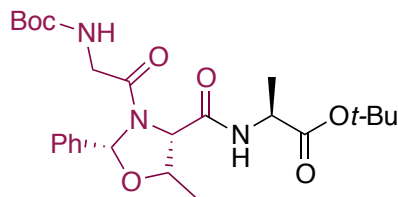

**Boc-Gly-L-Thr( $\Psi^{\text{Ph,H}}$ pro)-L-Ala-Ot-Bu (6ia):** A flame-dried 5.0 mL screw-cap vial equipped with a magnetic stirring bar (Sm-Co) was charged with Cyclo(-Boc-Gly-L-Thr( $\Psi^{\text{Ph,H}}$ pro)-) (**5i**, 173.2 mg, 0.50 mmol) and H-L-Ala-Ot-Bu (145.2 mg, 1.0 mmol). After the vial was sealed with screw-cap, the resulting mixture was stirred vigorously at 50 °C for 12 h. The reaction mixture was diluted with  $\text{CHCl}_3$  (3.0 mL), transferred onto  $\text{SiO}_2$  column by a pipette, and used vial and pipette were washed with  $\text{CHCl}_3$  (12 mL). The reaction mixture was purified directly by flash column chromatography (20–100% AcOEt in hexane) to provide the title compound **6ia** (243.8 mg, >99% yield, ratio of rotamers = 70:30) as a white solid with >99:1 dr.

$R_f$  = 0.50 (50% AcOEt in hexane). M.p. 60–61 °C.  $[\alpha]_D^{24} = -17.1$  ( $c$  1.17, MeOH).  $^1\text{H}$  NMR (400 MHz,  $\text{CDCl}_3$ )  $\delta$  7.57 (dd,  $J$  = 7.6, 1.6 Hz, 2H,  $\text{CHCH}(\text{CH}_3)\text{OCHC}_6\text{H}_5$ ), 7.50–7.20 (m, 3H + 1H x 70/100,  $\text{CHCH}(\text{CH}_3)\text{OCHC}_6\text{H}_5$ , and  $\text{NH}$ ), 6.95–6.75 (m, 1H x 30/100,  $\text{NH}$ ), 6.71 (s, 1H x 30/100,  $\text{CHCH}(\text{CH}_3)\text{OCHC}_6\text{H}_5$ ), 6.24 (s, 1H x 70/100,  $\text{CHCH}(\text{CH}_3)\text{OCHC}_6\text{H}_5$ ), 5.50–5.30 (m, 1H,  $(\text{CH}_3)_3\text{COCONH}$ ), 4.80–3.30 (m, 5H,  $\text{CH}_2$ ,  $\text{CHCH}(\text{CH}_3)\text{OCHC}_6\text{H}_5$ , and  $\text{CHCH}_3$ ), 1.70–1.30 (m, 3H + 3H x 70/100,  $\text{CHCH}(\text{CH}_3)\text{OCHC}_6\text{H}_5$  and  $\text{CHCH}_3$ ), 1.47 (s, 9H,  $\text{CO}_2\text{C}(\text{CH}_3)_3$ ), 1.41 (s, 9H,  $(\text{CH}_3)_3\text{COCONH}$ ), 1.10 (br s, 3H x 30/100,  $\text{CHCH}(\text{CH}_3)\text{OCHC}_6\text{H}_5$ ).  $^{13}\text{C}$  NMR (100 MHz,  $\text{CDCl}_3$ )  $\delta$  171.6 (1C x 70/100), 171.2 (1C x 30/100), 169.5 (1C x 30/100), 168.5 (1C x 70/100), 167.8, 156.0 (1C x 30/100), 155.6 (1C x 70/100), 138.2 (1C x 30/100), 136.9 (1C x 70/100), 129.6 (2C x 30/100), 128.9 (2C x 70/100), 128.6, 127.1 (2C x 70/100), 126.3 (2C x 30/100), 89.4 (1C x 70/100), 89.2 (1C x 30/100), 82.0, 80.0 (1C x 30/100), 79.8 (1C x 70/100), 78.4 (1C x 30/100), 74.3 (1C x 70/100), 65.4, 48.9 (1C x 70/100), 48.4 (1C x 30/100), 43.3, 28.2 (3C), 27.9 (3C), 19.2 (1C x 30/100), 18.3 (1C x 70/100), 18.0 (1C x 70/100), 17.3 (1C x 30/100). IR (thin film,  $\text{cm}^{-1}$ ) 3330, 2979, 1731, 1662, 1520, 1451, 1367, 1239, 1150, 1047, 845. HRMS (ESI) calculated for  $\text{C}_{25}\text{H}_{37}\text{N}_3\text{O}_7\text{Na}$   $[\text{M}+\text{Na}]^+$   $m/z$  514.2529, found, 514.2538.

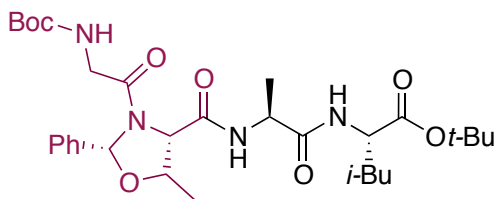

**Boc-Gly-L-Thr( $\psi^{\text{Ph,H}}$ pro)-L-Ala-L-Leu-O<sup>t</sup>-Bu (6ib):** A flame-dried 5.0 mL screw-cap vial equipped with a magnetic stirring bar (Nd) was charged with Cyclo(-Boc-Gly-L-Thr( $\psi^{\text{Ph,H}}$ pro)-) (**5i**, 173.2 mg, 0.50 mmol) and H-L-Ala-L-Leu-O<sup>t</sup>-Bu (258.4 mg, 1.0 mmol). After the vial was sealed with screw-cap, the resulting mixture was stirred vigorously at 50 °C for 12 h. The reaction mixture was diluted with CHCl<sub>3</sub> (3.0 mL), transferred onto SiO<sub>2</sub> column by a pipette, and used vial and pipette were washed with CHCl<sub>3</sub> (12 mL). The reaction mixture was purified directly by flash column chromatography (20–100% AcOEt in hexane) to provide the title compound **6ib** (207.0 mg, 68% yield, ratio of rotamers = 70:30) as a white solid with >99:1 dr.

$R_f$  = 0.31 (50% AcOEt in hexane). M.p. 62–63 °C.  $[\alpha]_D^{24}$  = –49.2 ( $c$  1.24, MeOH). <sup>1</sup>H NMR (400 MHz, CDCl<sub>3</sub>)  $\delta$  7.70–7.50 (m, 2H, CHCH(CH<sub>3</sub>)OCHC<sub>6</sub>H<sub>5</sub>), 7.50–6.50 (m, 5H, CHCH(CH<sub>3</sub>)OCHC<sub>6</sub>H<sub>5</sub>, NH, and NH), 6.95–6.75 (m, 1H x 30/100, NH), 6.48 (s, 1H x 30/100, CHCH(CH<sub>3</sub>)OCHC<sub>6</sub>H<sub>5</sub>), 6.26 (s, 1H x 70/100, CHCH(CH<sub>3</sub>)OCHC<sub>6</sub>H<sub>5</sub>), 5.50–5.30 (m, 1H, (CH<sub>3</sub>)<sub>3</sub>COCONH), 4.60–3.40 (m, 6H, CH<sub>2</sub>, CHCH(CH<sub>3</sub>)OCHC<sub>6</sub>H<sub>5</sub>, CHCH<sub>3</sub>, and CHCH<sub>2</sub>CH(CH<sub>3</sub>)<sub>2</sub>), 2.20–2.05 (m, 1H, CHCH<sub>2</sub>CH(CH<sub>3</sub>)<sub>2</sub>), 1.70–1.00 (m, 8H, CHCH(CH<sub>3</sub>)OCHC<sub>6</sub>H<sub>5</sub>, CHCH<sub>3</sub>, and CHCH<sub>2</sub>CH(CH<sub>3</sub>)<sub>2</sub>), 1.45 (s, 9H, CO<sub>2</sub>C(CH<sub>3</sub>)<sub>3</sub>), 1.41 (s, 9H, (CH<sub>3</sub>)<sub>3</sub>COCONH), 0.91 (d,  $J$  = 6.1 Hz, 3H, CHCH<sub>2</sub>CH(CH<sub>3</sub>)<sub>2</sub>), 0.91 (d,  $J$  = 6.1 Hz, 3H, CHCH<sub>2</sub>CH(CH<sub>3</sub>)<sub>2</sub>). <sup>13</sup>C NMR (100 MHz, CDCl<sub>3</sub>)  $\delta$  171.8, 171.3, 169.6 (1C x 30/100), 168.6 (1C x 70/100), 168.3 (1C x 30/100), 168.2 (1C x 70/100), 156.3 (1C x 30/100), 155.6 (1C x 70/100), 138.2 (1C x 30/100), 136.9 (1C x 70/100), 129.6, 128.9 (2C x 70/100), 128.6 (2C x 30/100), 127.0 (2C x 70/100), 126.2 (2C x 30/100), 89.4 (1C x 70/100), 89.2 (1C x 30/100), 81.9, 80.1 (1C x 30/100), 79.9 (1C x 70/100), 78.4 (1C x 30/100), 74.5 (1C x 70/100), 65.6 (1C x 70/100), 65.3 (1C x 30/100), 51.4 49.2 (1C x 70/100), 49.0 (1C x 30/100), 43.2, 41.5, 28.2 (3C), 27.9 (3C), 24.8, 22.7, 22.0, 19.1 (1C x 30/100), 17.9 (1C x 70/100), 17.9 (1C x 70/100), 17.4 (1C x 30/100). IR (thin film, cm<sup>–1</sup>) 3322, 2978, 1719, 1649, 1518, 1450, 1366, 1244, 1150, 1050, 843. HRMS (ESI) calculated for C<sub>31</sub>H<sub>48</sub>N<sub>4</sub>O<sub>8</sub>Na [M+Na]<sup>+</sup>  $m/z$  627.3370, found, 627.3358.



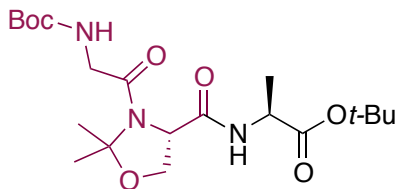

**Boc-Gly-L-Ser( $\psi^{\text{Me,Me}}$ pro)-L-Ala-Ot-Bu (6j):** A flame-dried 5.0 mL screw-cap vial equipped with a magnetic stirring bar (Sm-Co) was charged with Cyclo(-Boc-Gly-L-Ser( $\psi^{\text{Me,Me}}$ pro)-) (**5j**, 142.2 mg, 0.50 mmol) and H-L-Ala-Ot-Bu (145.2 mg, 1.0 mmol). After the vial was sealed with screw-cap, the resulting mixture was stirred vigorously at 50 °C for 12 h. The reaction mixture was diluted with  $\text{CHCl}_3$  (3.0 mL), transferred onto  $\text{SiO}_2$  column by a pipette, and used vial and pipette were washed with  $\text{CHCl}_3$  (12 mL). The reaction mixture was purified directly by flash column chromatography (30–80% AcOEt in hexane) to provide the title compound **6j** (210.5 mg, 98% yield, ratio of rotamers = 77:23) as a white solid with >99:1 dr.

$R_f$  = 0.30 (80% AcOEt in hexane). M.p. 31–32 °C.  $[\alpha]_D^{25} = -81.2$  ( $c$  1.01, MeOH).  $^1\text{H}$  NMR (400 MHz,  $\text{CDCl}_3$ )  $\delta$  6.95 (br d,  $J$  = 7.2 Hz, 1H,  $\text{NH}$ ), 5.45–5.30 (m, 1H,  $(\text{CH}_3)_3\text{COCONH}$ ), 4.44 (quin,  $J$  = 7.2 Hz, 1H,  $\text{CHCH}_3$ ), 4.35 (d,  $J$  = 6.6 Hz, 1H,  $\text{CHCH}_2\text{OC}(\text{CH}_3)_2$ ), 4.29 (d,  $J$  = 9.4 Hz, 1H,  $\text{CHCH}_2\text{OC}(\text{CH}_3)_2$ ), 4.18 (dd,  $J$  = 9.4, 6.6 Hz, 1H,  $\text{CHCH}_2\text{OC}(\text{CH}_3)_2$ ), 3.90 (dd,  $J$  = 17.0, 5.9 Hz, 1H,  $\text{CH}_2$ ), 3.79 (dd,  $J$  = 17.0, 4.3 Hz, 1H x 77/100,  $\text{CH}_2$ ), 3.71 (dd,  $J$  = 17.0, 4.3 Hz, 1H x 23/100,  $\text{CH}_2$ ), 1.76 (s, 3H,  $\text{CHCH}_2\text{OC}(\text{CH}_3)_2$ ), 1.58 (s, 3H,  $\text{CHCH}_2\text{OC}(\text{CH}_3)_2$ ), 1.46 (s, 9H x 23/100,  $\text{CO}_2\text{C}(\text{CH}_3)_3$ ), 1.45 (s, 9H x 77/100,  $\text{CO}_2\text{C}(\text{CH}_3)_3$ ), 1.43 (s, 9H,  $(\text{CH}_3)_3\text{COCONH}$ ), 1.41 (d,  $J$  = 7.2 Hz, 3H x 77/100,  $\text{CHCH}_3$ ), 1.40 (d,  $J$  = 7.2 Hz, 3H x 23/100,  $\text{CHCH}_3$ ).  $^{13}\text{C}$  NMR (100 MHz,  $\text{CDCl}_3$ )  $\delta$  171.4, 169.2 (1C x 77/100), 168.9 (1C x 23/100), 166.8 (1C x 77/100), 166.7 (1C x 23/100), 156.0 (1C x 77/100), 155.8 (1C x 23/100), 97.1 (1C x 23/100), 97.0 (1C x 77/100), 82.4 (1C x 23/100), 82.3 (1C x 77/100), 80.0 (1C x 23/100), 79.9 (1C x 77/100), 67.9, 59.9, 49.0 (1C x 23/100), 49.0 (1C x 77/100), 43.9 (1C x 23/100), 43.8 (1C x 77/100), 28.2 (3C), 27.9 (3C), 25.8 (1C x 23/100), 25.7 (1C x 77/100), 22.8, 18.2 (1C x 23/100), 17.9 (1C x 77/100). IR (thin film,  $\text{cm}^{-1}$ ) 3303, 2977, 1649, 1521, 1424, 1366, 1246, 1147, 1077, 1051, 841. HRMS (ESI) calculated for  $\text{C}_{20}\text{H}_{35}\text{N}_3\text{O}_7\text{Na}$   $[\text{M}+\text{Na}]^+$   $m/z$  452.2373, found, 452.2388.

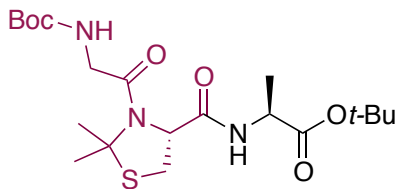

**Boc-Gly-L-Cys( $\psi^{\text{Me,Me}}$ pro)-L-Ala-Ot-Bu (6k):** A flame-dried 5.0 mL screw-cap vial equipped with a magnetic stirring bar (Sm-Co) was charged with Cyclo(-Boc-Gly-L-Cys( $\psi^{\text{Me,Me}}$ pro)-) (**5k**, 150.2 mg, 0.50 mmol) and H-L-Ala-Ot-Bu (145.2 mg, 1.0 mmol). After the vial was sealed with screw-cap, the resulting mixture was stirred vigorously at 50 °C for 24 h. The reaction mixture was diluted with  $\text{CHCl}_3$  (3.0 mL), transferred onto  $\text{SiO}_2$  column by a pipette, and used vial and pipette were washed with  $\text{CHCl}_3$  (12 mL). The reaction mixture was purified directly by flash column chromatography (AcOEt) to provide a mixture of the title compound **6k** and H-L-Ala-Ot-Bu. Finally, H-L-Ala-Ot-Bu was evaporated *in vacuo* with the aid of an oil rotary vacuum pump to provide **6k** (207.2 mg, 93% yield, ratio of rotamers = 63:37) as a white solid with >99:1 dr.

$R_f$  = 0.26 (50% AcOEt in hexane). M.p. 54–55 °C.  $[\alpha]_{\text{D}}^{20} = -39.0$  ( $c$  1.00, MeOH).  $^1\text{H}$  NMR (400 MHz,  $\text{CDCl}_3$ )  $\delta$  6.96 (br d,  $J$  = 7.1 Hz, 1H,  $\text{NH}$ ), 5.45–5.25 (m, 1H,  $(\text{CH}_3)_3\text{COCONH}$ ), 4.66 (br s, 1H,  $\text{CHCH}_2\text{SC}(\text{CH}_3)_2$ ), 4.44 (quin,  $J$  = 7.1 Hz, 1H,  $\text{CHCH}_3$ ), 4.00–3.60 (m, 2H,  $\text{CH}_2$ ), 3.36 (d,  $J$  = 11.8 Hz, 1H,  $\text{CHCH}_2\text{SC}(\text{CH}_3)_2$ ), 3.31 (d,  $J$  = 11.8 Hz, 1H,  $\text{CHCH}_2\text{SC}(\text{CH}_3)_2$ ), 2.04 (s, 3H x 37/100,  $\text{CHCH}_2\text{SC}(\text{CH}_3)_2$ ), 1.98 (s, 3H x 63/100,  $\text{CHCH}_2\text{SC}(\text{CH}_3)_2$ ), 1.85 (s, 3H x 63/100,  $\text{CHCH}_2\text{SC}(\text{CH}_3)_2$ ), 1.84 (s, 3H x 37/100,  $\text{CHCH}_2\text{SC}(\text{CH}_3)_2$ ), 1.47 (s, 9H x 37/100,  $\text{CO}_2\text{C}(\text{CH}_3)_3$ ), 1.45 (s, 9H x 63/100,  $\text{CO}_2\text{C}(\text{CH}_3)_3$ ), 1.43 (s, 9H,  $(\text{CH}_3)_3\text{COCONH}$ ), 1.42 (d,  $J$  = 7.1 Hz, 3H x 63/100,  $\text{CHCH}_3$ ), 1.40 (d,  $J$  = 7.1 Hz, 3H x 37/100,  $\text{CHCH}_3$ ).  $^{13}\text{C}$  NMR (100 MHz,  $\text{CDCl}_3$ )  $\delta$  171.4, 168.8 (1C x 63/100), 168.7 (1C x 37/100), 167.5 (1C x 63/100), 167.4 (1C x 37/100), 156.0 (1C x 63/100), 155.7 (1C x 37/100), 82.4 (1C x 37/100), 82.2 (1C x 63/100), 79.8, 74.5 (1C x 37/100), 74.5 (1C x 63/100), 66.0, 49.2, 44.6, 32.4, 28.6, 28.2 (3C), 27.9 (3C x 37/100), 27.9 (3C x 63/100), 27.7, 18.3 (1C x 37/100), 18.0 (1C x 63/100). IR (thin film,  $\text{cm}^{-1}$ ) 3319, 2979, 1670, 1651, 1517, 1453, 1392, 1366, 1246, 1147, 1052. HRMS (ESI) calculated for  $\text{C}_{20}\text{H}_{35}\text{N}_3\text{O}_6\text{SNa}$   $[\text{M}+\text{Na}]^+$   $m/z$  468.2144, found, 468.2139.

## 10. Synthesis of hexapeptides (Scheme 4)

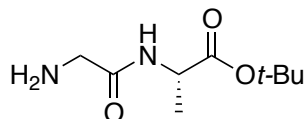

**H-Gly-L-Ala-Ot-Bu (7, CAS No. 58177-80-3)**<sup>12</sup>: A flame-dried 300 mL two-necked round-bottom flask equipped with a magnetic stirring bar (Nd) and nitrogen balloon was charged with H-Gly-OH (2.63 g, 35 mmol), CsF (531.7 mg, 3.5 mmol), imidazole (238.3 mg, 3.5 mmol), and CHCl<sub>3</sub> (70 mL). After HSi[OCH(CF<sub>3</sub>)<sub>2</sub>]<sub>3</sub> (37.11 g, 70 mmol) was added to the mixture at room and then the resulting mixture was stirred vigorously under nitrogen atmosphere at 50 °C for 1 h. Next, *N*-(*tert*-butyldimethylsilyl)-*N*-methyltrifluoroacetamide (MTBSTFA, 8.45 g, 35 mmol) was added to the reaction mixture and the resulting mixture was stirred vigorously under nitrogen atmosphere at 30 °C for 1 h. Then H-L-Ala-Ot-Bu (10.16 g, 70 mmol) was added to the reaction mixture and the resulting mixture was stirred vigorously under nitrogen atmosphere at 30 °C for 24 h. The reaction mixture was transferred onto SiO<sub>2</sub> column by a pipette, and used two-necked round-bottom flask and pipette were washed with CHCl<sub>3</sub> (20 mL). The reaction mixture was purified directly by flash column chromatography (5–20% MeOH in CHCl<sub>3</sub>) to provide the title compound **7** (5.53 g, 78% yield).

$R_f = 0.53$  (20% MeOH in CHCl<sub>3</sub>). <sup>1</sup>H NMR (400 MHz, CDCl<sub>3</sub>)  $\delta$  7.74 (br d,  $J = 7.1$  Hz, 1H, NH), 4.49 (quin,  $J = 7.1$  Hz, 1H, CHCH<sub>3</sub>), 3.43 (s, 2H, CH<sub>2</sub>), 2.42 (br s, 2H, NH<sub>2</sub>), 1.47 (s, 9H, CO<sub>2</sub>C(CH<sub>3</sub>)<sub>3</sub>), 1.39 (d,  $J = 7.1$  Hz, 3H, CHCH<sub>3</sub>). <sup>13</sup>C NMR (100 MHz, CDCl<sub>3</sub>)  $\delta$  172.2, 171.7, 81.8, 48.2, 44.4, 27.9 (3C), 18.6. IR (thin film, cm<sup>-1</sup>) 3301, 2980, 2935, 1732, 1655, 1521, 1454, 1368, 1225, 1146, 846.

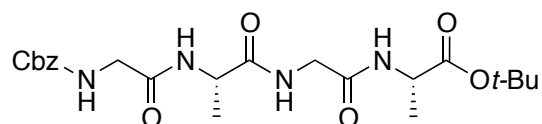

**Cbz-Gly-L-Ala-Gly-L-Ala-Ot-Bu (8)**: A flame-dried 100 mL schlenk flask equipped with a magnetic stirring bar (Nd) and nitrogen balloon was charged with H-Gly-Ala-Ot-Bu (5.53 g, 27.3 mmol), Cbz-Gly-L-Ala-OH (5.11 g, 18.2 mmol), and CHCl<sub>3</sub> (18.2 mL). After HSi[OCH(CF<sub>3</sub>)<sub>2</sub>]<sub>3</sub> (12.56 g, 23.7 mmol) was added to the mixture at room temperature, the resulting mixture was

stirred vigorously under nitrogen atmosphere at 50 °C for 24 h. Next, the reaction mixture was transferred to a separatory funnel with CHCl<sub>3</sub> (300 mL) and saturated aqueous solution of NH<sub>4</sub>Cl (150 mL) was added. The phases were separated and aqueous layer was extracted with CHCl<sub>3</sub> (2 x 200 mL). The organic phase dried over MgSO<sub>4</sub>, filtered, concentrated in *vacuo* with the aid of a rotary evaporator and water bath. The crude product was then diluted with 5% MeOH in CHCl<sub>3</sub> (30 mL), transferred onto SiO<sub>2</sub> column by a pipette, and used round-bottom flask and pipette were washed with 5% MeOH in CHCl<sub>3</sub> (2 x 20 mL). The crude product was purified by flash column chromatography (5–20% MeOH in CHCl<sub>3</sub>) to provide the title compound **8** (8.43 g, >99% yield) as a white solid with >99:1 dr.

$R_f$  = 0.30 (10% MeOH in CHCl<sub>3</sub>). M.p. 145–147 °C.  $[\alpha]_D^{21} = -32.2$  ( $c$  1.15, MeOH). <sup>1</sup>H NMR (400 MHz, CD<sub>3</sub>OD)  $\delta$  7.40–7.20 (m, 5H, C<sub>6</sub>H<sub>5</sub>CH<sub>2</sub>OCONH), 5.08 (s, 2H, C<sub>6</sub>H<sub>5</sub>CH<sub>2</sub>OCONH), 4.31 (q,  $J$  = 7.1 Hz, 1H, CHCH<sub>3</sub>), 4.23 (q,  $J$  = 7.3 Hz, 1H, CHCH<sub>3</sub>), 4.00–3.70 (m, 4H, CH<sub>2</sub> and CH<sub>2</sub>), 1.44 (s, 9H, CO<sub>2</sub>C(CH<sub>3</sub>)<sub>3</sub>), 1.37 (d,  $J$  = 7.1 Hz, 3H, CHCH<sub>3</sub>), 1.33 (d,  $J$  = 7.1 Hz, 3H, CHCH<sub>3</sub>). <sup>13</sup>C NMR (100 MHz, CD<sub>3</sub>OD)  $\delta$  175.4, 173.4, 172.4, 171.3, 159.2, 138.0, 129.5 (2C), 129.1, 128.9 (2C), 82.7, 67.9, 51.0, 50.3, 44.8, 43.2, 28.2 (3C), 17.4 (2C). IR (thin film, cm<sup>-1</sup>) 3277, 1733, 1711, 1673, 1631, 1514, 1447, 1366, 1231, 1148, 1048. HRMS (ESI) calculated for C<sub>22</sub>H<sub>32</sub>N<sub>4</sub>O<sub>7</sub>Na [M+Na]<sup>+</sup>  $m/z$  487.2169, found, 487.2164.

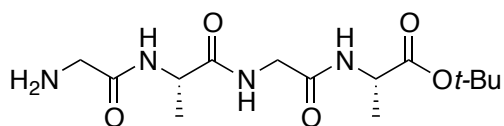

**H-Gly-L-Ala-Gly-L-Ala-Obt-Bu (9):** A flame-dried 300 mL round-bottom flask equipped with a magnetic stirring bar (Sm-Co) was charged with **8** (8.42 g, 18.16 mmol), 5% Pd/C type NX (843.4 mg, 10 wt%), and MeOH (180 mL), then evacuated and backfilled with hydrogen (this process was repeated a total of 15 times). The resulting mixture was stirred under hydrogen atmosphere at ambient temperature for 5 h. After completion, the reaction mixture was filtrated by filter paper with MeOH (200 mL), and the solvents were removed in *vacuo* with the aid of a rotary evaporator. The title compound **9** (5.98 g, >99% yield) was obtained as a white solid with >99:1 dr.

$R_f$  = 0.20 (50% MeOH in CHCl<sub>3</sub>). M.p. 27–28 °C.  $[\alpha]_D^{23} = -38.1$  ( $c$  1.05, MeOH). <sup>1</sup>H NMR (400 MHz, CD<sub>3</sub>OD)  $\delta$  4.35 (q,  $J$  = 7.3 Hz, 1H, CHCH<sub>3</sub>), 4.28 (q,  $J$  = 7.3 Hz, 1H, CHCH<sub>3</sub>), 3.92 (d,  $J$  =

16.7 Hz, 1H,  $\underline{\text{CH}_2}$ ), 3.85 (d,  $J = 16.7$  Hz, 1H,  $\underline{\text{CH}_2}$ ), 3.57 (d,  $J = 16.5$  Hz, 1H,  $\underline{\text{CH}_2}$ ), 3.53 (d,  $J = 16.5$  Hz, 1H,  $\underline{\text{CH}_2}$ ), 1.46 (s, 9H,  $\text{CO}_2\text{C}(\underline{\text{CH}_3})_3$ ), 1.39 (d,  $J = 7.3$  Hz, 3H,  $\text{CHCH}_3$ ), 1.37 (d,  $J = 7.3$  Hz, 3H,  $\text{CHCH}_3$ ).  $^{13}\text{C}$  NMR (100 MHz,  $\text{CD}_3\text{OD}$ )  $\delta$  175.3, 173.5, 171.1, 170.9, 82.8, 50.8, 50.3, 43.2, 43.0, 28.2 (3C), 17.7, 17.5. IR (thin film,  $\text{cm}^{-1}$ ) 3309, 2980, 2935, 2476, 1732, 1643, 1532, 1447, 1331, 1228, 1146. HRMS (ESI) calculated for  $\text{C}_{14}\text{H}_{26}\text{N}_4\text{O}_5\text{Na}$   $[\text{M}+\text{Na}]^+$   $m/z$  353.1801, found, 353.1833.

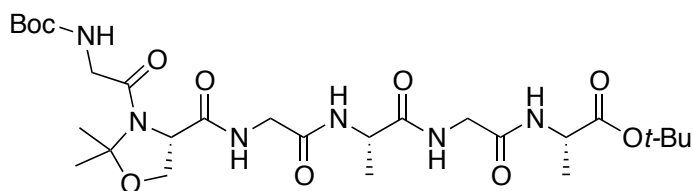

**Boc-Gly-L-Ser( $\psi^{\text{Me,Me}}$ pro)-Gly-L-Ala-Gly-L-Ala-Ot-Bu (10):** A flame-dried 50 mL screw-cap vial equipped with a magnetic stirring bar (Nd) was charged with Cyclo(-Boc-Gly-L-Ser( $\psi^{\text{Me,Me}}$ pro)-) (**5j**, 1.71 g, 6.0 mmol), H-Gly-L-Ala-Gly-L-Ala-Ot-Bu (**9**, 3.96 g, 12.0 mmol), and CPME (9 mL). After the vial was sealed with screw-cap, the resulting mixture was stirred vigorously at 50 °C for 48 h. The reaction mixture was diluted with 10% MeOH in  $\text{CHCl}_3$  (20 mL), transferred onto  $\text{SiO}_2$  column by a pipette, and used vial and pipette were washed with 10% MeOH in  $\text{CHCl}_3$  (100 mL). The reaction mixture was purified directly by flash column chromatography (10% MeOH in  $\text{CHCl}_3$ ) to provide the title compound **10** (3.13 g, 85% yield, >99:1 dr) as a white solid with >99:1 dr.

$R_f = 0.31$  (10% MeOH in  $\text{CHCl}_3$ ). M.p. 119–120 °C.  $[\alpha]_D^{19} = -53.3$  ( $c$  1.05, MeOH).  $^1\text{H}$  NMR (400 MHz,  $\text{CD}_3\text{OD}$ )  $\delta$  4.70–3.50 (m, 11H,  $\underline{\text{CH}_2}$ ,  $\underline{\text{CHCH}_2\text{OC}(\text{CH}_3)_2}$ ,  $\underline{\text{CH}_2}$ ,  $\underline{\text{CHCH}_3}$ ,  $\underline{\text{CH}_2}$ , and  $\underline{\text{CHCH}_3}$ ), 1.67 (s, 3H,  $\text{CHCH}_2\text{OC}(\underline{\text{CH}_3})_2$ ), 1.55 (s, 3H,  $\text{CHCH}_2\text{OC}(\underline{\text{CH}_3})_2$ ), 1.46 (s, 9H,  $\text{CO}_2\text{C}(\underline{\text{CH}_3})_3$ ), 1.44 (s, 9H,  $(\underline{\text{CH}_3})_3\text{COCONH}$ ), 1.38 (d,  $J = 7.3$  Hz, 3H,  $\text{CHCH}_3$ ), 1.36 (d,  $J = 7.3$  Hz, 3H,  $\text{CHCH}_3$ ).  $^{13}\text{C}$  NMR (100 MHz,  $\text{CD}_3\text{OD}$ )  $\delta$  175.4, 173.4, 172.8, 171.1 (2C), 169.0, 158.5, 98.1, 82.7, 80.6, 69.1, 60.7, 50.8, 50.3, 44.5, 43.7, 43.3, 28.7 (3C), 28.2 (3C), 25.5, 23.5, 17.6 (2C). IR (thin film,  $\text{cm}^{-1}$ ) 3301, 2979, 1701, 1660, 1630, 1520, 1366, 1230, 1146, 1079, 1053. HRMS (ESI) calculated for  $\text{C}_{27}\text{H}_{46}\text{N}_6\text{O}_{10}\text{Na}$   $[\text{M}+\text{Na}]^+$   $m/z$  637.3173, found, 637.3135.

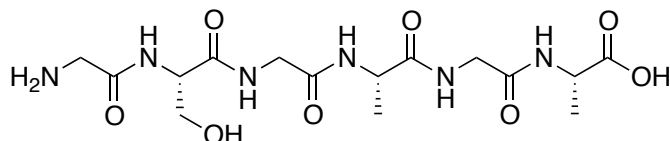

**H-Gly-L-Ser-Gly-L-Ala-Gly-L-Ala-OH (11, CAS No. 844644-62-8):** A 20 mL screw-cap vial equipped with a magnetic stirring bar (Sm-Co) was charged with Boc-Gly-L-Ser( $\psi^{\text{Me,Me}}$ pro)-Gly-L-Ala-Gly-L-Ala-*Ot*-Bu (**10**, 307.3 mg, 0.50 mmol) and 1 *N* HCl aq. (5.0 mL). After the vial was sealed with screw-cap, the resulting mixture was stirred vigorously at room temperature for 2 h. The reaction mixture was concentrated to provide the title compound **11** (209.0 mg, >99% yield) as a white solid with >99:1 dr.

M.p. 200–201 °C.  $^1\text{H}$  NMR (400 MHz,  $\text{D}_2\text{O}$ )  $\delta$  4.50 (t,  $J = 5.2$  Hz, 1H,  $\text{CHCH}_2\text{OH}$ ), 4.45–4.20 (m, 2H,  $\text{CHCH}_3$  and  $\text{CHCH}_3$ ), 4.05–3.80 (m, 8H,  $\text{CH}_2$ ,  $\text{CHCH}_2\text{OH}$ ,  $\text{CH}_2$ , and  $\text{CH}_2$ ), 1.38 (d,  $J = 7.3$  Hz, 3H,  $\text{CHCH}_3$ ), 1.36 (d,  $J = 7.8$  Hz, 3H,  $\text{CHCH}_3$ ).  $^{13}\text{C}$  NMR (100 MHz,  $(\text{CD}_3)_2\text{SO}$ )  $\delta$  174.0, 172.4, 170.0, 168.7, 168.5, 166.3, 61.6, 55.6, 48.5, 47.5, 42.2, 41.7, 30.7, 17.9, 17.2. IR (thin film,  $\text{cm}^{-1}$ ) 3284, 1701, 1660, 1633, 1526, 1366, 1198, 1169, 1130. HRMS (ESI) calculated for  $\text{C}_{15}\text{H}_{26}\text{N}_6\text{O}_8\text{Na}$   $[\text{M}+\text{Na}]^+$   $m/z$  441.1710, found, 441.1712.

## 11. References

1. W. Muramatsu, C. Manthena, E. Nakashima and H. Yamamoto, *ACS Catal.* 2020, **10**, 9594–9603.
2. F. Lepifre, S. Clavier, P. Bouyssou and G. Coudert, *Tetrahedron* 2001, **57**, 6969–6975.
3. J. E. Baldwin, R. M. Adlington, A. T. Russell and M. L. Smith, *Tetrahedron* 1995, **51**, 4733–4762.
4. K. Tanaka, S. Yoshifuji and Y. Nitta, *Heterocycles* 1986, **24**, 2539–2543.
5. D. Farran, I. Parrot, J. Martinez and G. *Angew. Chem. Int. Ed.* 2007, **46**, 7488–7490.
6. W. Muramatsu, T. Hattori and H. Yamamoto, *J. Am. Chem. Soc.* 2019, **141**, 12288–12295.
7. G. M. F. Bisset, V. Bavetsias, T. J. Thornton, K. Pawelczak, A. H. Calvert, L. R. Hughes and A. L. Jackman, *J. Med. Chem.* 1994, **37**, 3294–3302.
8. K. K. H. Vong, S. Maeda and K. Tanaka, *Chem. Eur. J.* 2016, **22**, 18865–18872.
9. L. Pérez-Picaso, J. Escalante, H. F. Olivo and M. Y. Rios, *Molecules* 2019, **14**, 2836–2849.
10. D. Farran, D. Echalié, J. Martinez and G. *J. Pept. Sci.* 2009, **15**, 474–478.
11. E. Heidemann and H. W. Nill, *Z. Naturforschg.* 1969, **24b**, 837–843.

## 12. HPLC data

### Boc- $\delta$ -HoGly-*rac*-Ala-*Ot*-Bu

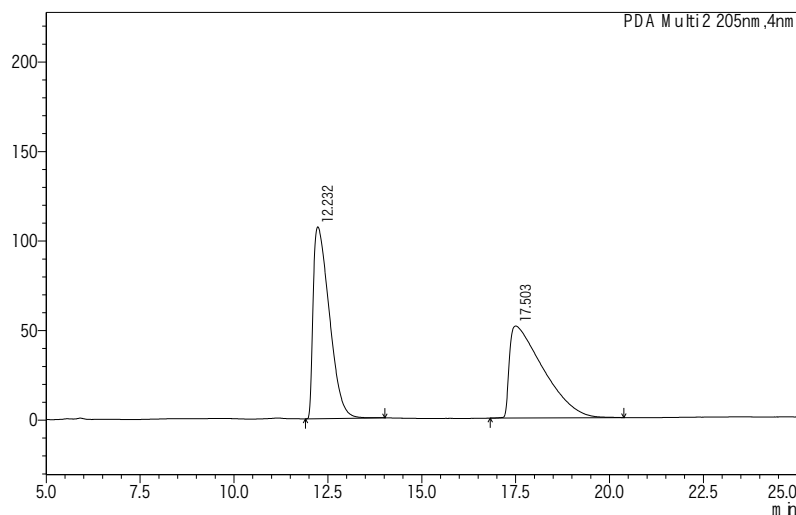

Peak Table

| Peak# | Ret. Time | Area    | Area%   |
|-------|-----------|---------|---------|
| 1     | 12.232    | 3212531 | 49.996  |
| 2     | 17.503    | 3213053 | 50.004  |
| Total |           | 6425584 | 100.000 |

12.232 min = Boc- $\delta$ -HoGly-D-Ala-*Ot*-Bu; 17.503 min = Boc- $\delta$ -HoGly-L-Ala-*Ot*-Bu

Conditions: 2-propanol/hexane = 3:97,  $\nu$  = 1.5 mL/min,  $\lambda$  = 205 nm, 40 °C

Chiral Column: IA-3 column from Daicel Chemical Ind., Ltd

### Boc- $\delta$ -HoGly-L-Ala-*Ot*-Bu (2a, Table 1)

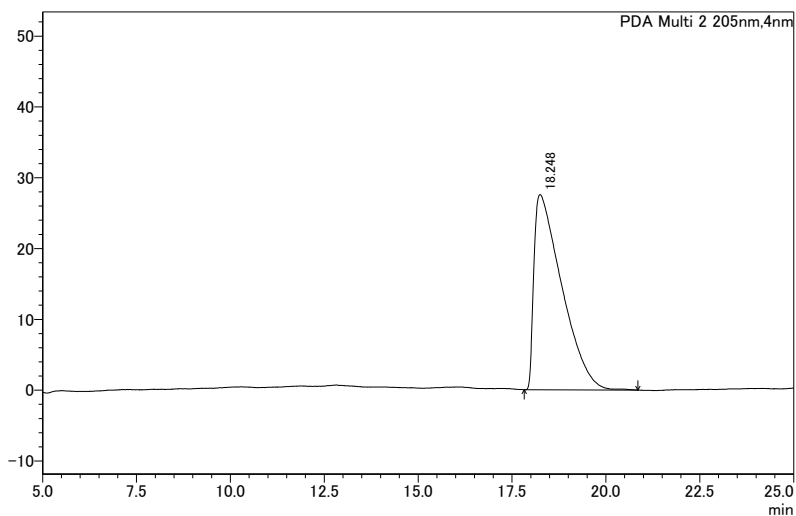

Peak Table

| Peak# | Ret. Time | Area    | Area%   |
|-------|-----------|---------|---------|
| 1     | 18.248    | 1423592 | 100.000 |
| Total |           | 1423592 | 100.000 |



## Cbz- $\delta$ -HoGly-*rac*-Ala-*OT*-Bu

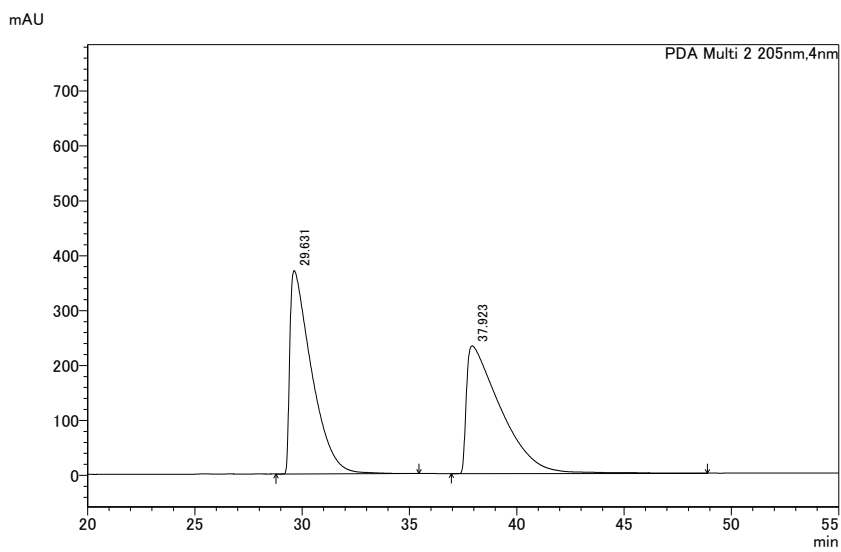

Peak Table

| Peak# | Ret. Time | Area     | Area%   |
|-------|-----------|----------|---------|
| 1     | 29.631    | 26085163 | 50.012  |
| 2     | 37.923    | 26073079 | 49.988  |
| Total |           | 52158241 | 100.000 |

29.631 min = Cbz- $\delta$ -HoGly-D-Ala-*OT*-Bu; 37.923 min = Cbz- $\delta$ -HoGly-L-Ala-*OT*-Bu

Conditions: 2-propanol/hexane = 3:97,  $\nu$  = 1.5 mL/min,  $\lambda$  = 205 nm, 40 °C

Chiral Column: IA-3 column from Daicel Chemical Ind., Ltd

## Cbz- $\delta$ -HoGly-L-Ala-*OT*-Bu (2b, Table 1)

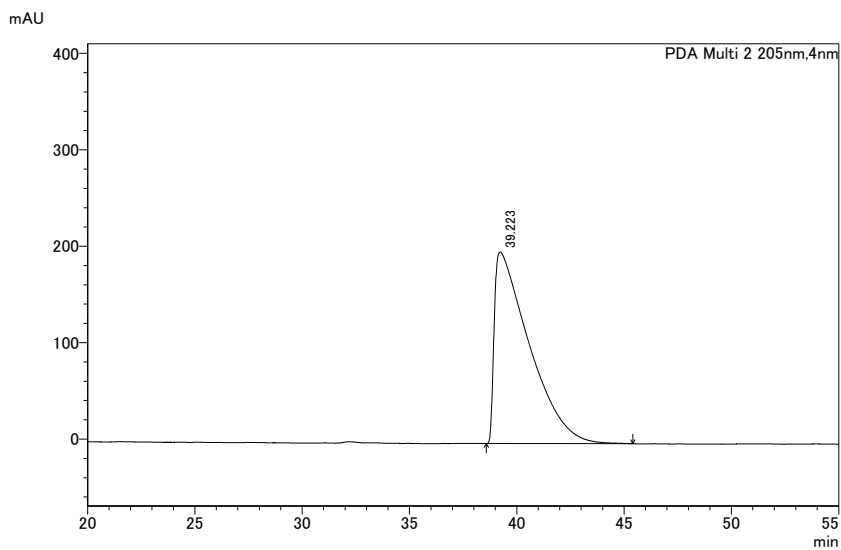

Peak Table

| Peak# | Ret. Time | Area     | Area%   |
|-------|-----------|----------|---------|
| 1     | 39.223    | 22498903 | 100.000 |
| Total |           | 22498903 | 100.000 |

## Boc- $\beta$ -HoGly-*rac*-Ala-O*t*-Bu

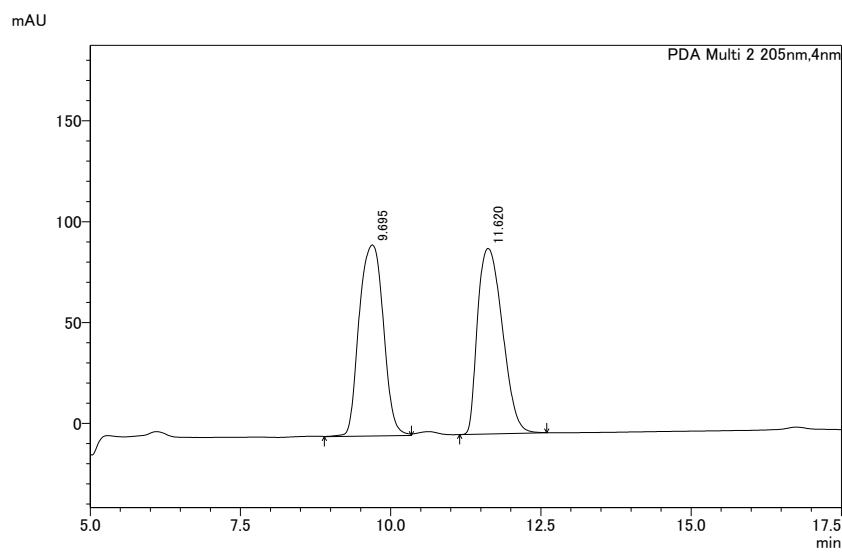

Peak Table

| Peak# | Ret. Time | Area    | Area%   |
|-------|-----------|---------|---------|
| 1     | 9.695     | 2657873 | 50.141  |
| 2     | 11.620    | 2642949 | 49.859  |
| Total |           | 5300822 | 100.000 |

9.977 min = Boc- $\beta$ -HoGly-D-Ala-O*t*-Bu; 12.652 min = Boc- $\beta$ -HoGly-L-Ala-O*t*-Bu

Conditions: 2-propanol/hexane = 4:96,  $\nu$  = 0.8 mL/min,  $\lambda$  = 205 nm, 40 °C

Chiral Column: IA-3 column from Daicel Chemical Ind., Ltd

## Boc- $\beta$ -HoGly-L-Ala-O*t*-Bu (2h, Table 1)

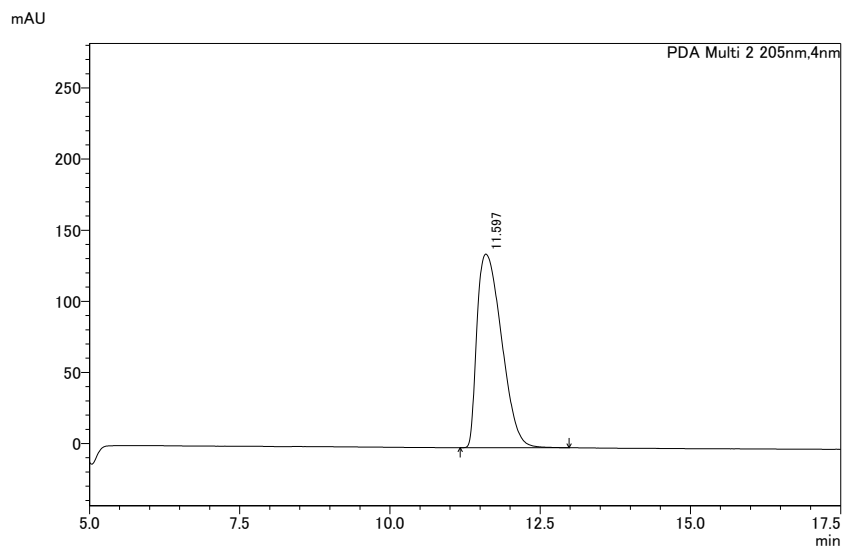

Peak Table

| Peak# | Ret. Time | Area    | Area%   |
|-------|-----------|---------|---------|
| 1     | 11.597    | 3876838 | 100.000 |
| Total |           | 3876838 | 100.000 |

## Boc- $\gamma$ -HoGly-*rac*-Ala-O*t*-Bu

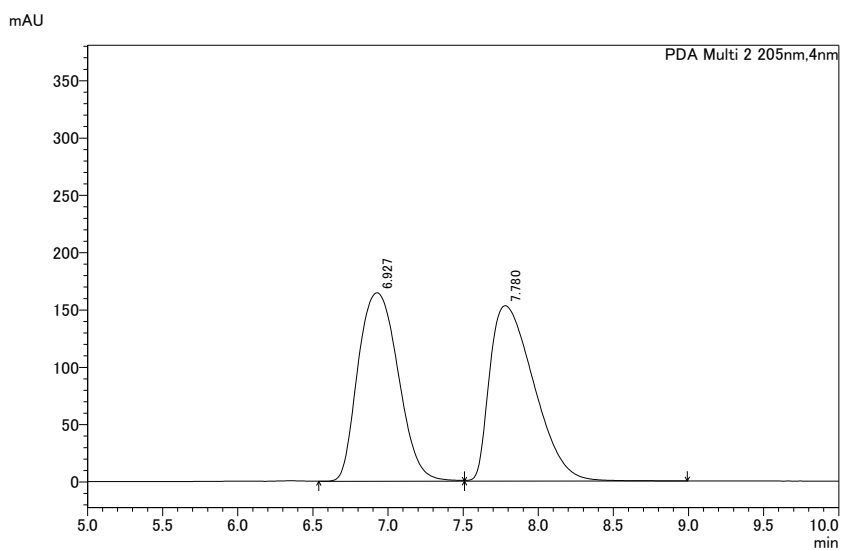

Peak Table

| Peak# | Ret. Time | Area    | Area%   |
|-------|-----------|---------|---------|
| 1     | 6.927     | 3069679 | 49.427  |
| 2     | 7.780     | 3140874 | 50.573  |
| Total |           | 6210553 | 100.000 |

6.927 min = Boc- $\gamma$ -HoGly-D-Ala-O*t*-Bu; 7.780 min = Boc- $\gamma$ -HoGly-L-Ala-O*t*-Bu

Conditions: 2-propanol/hexane = 6:94,  $\nu$  = 1.0 mL/min,  $\lambda$  = 205 nm, 40 °C

Chiral Column: IA-3 column from Daicel Chemical Ind., Ltd

## Boc- $\gamma$ -HoGly-L-Ala-O*t*-Bu (2i, Table 1)

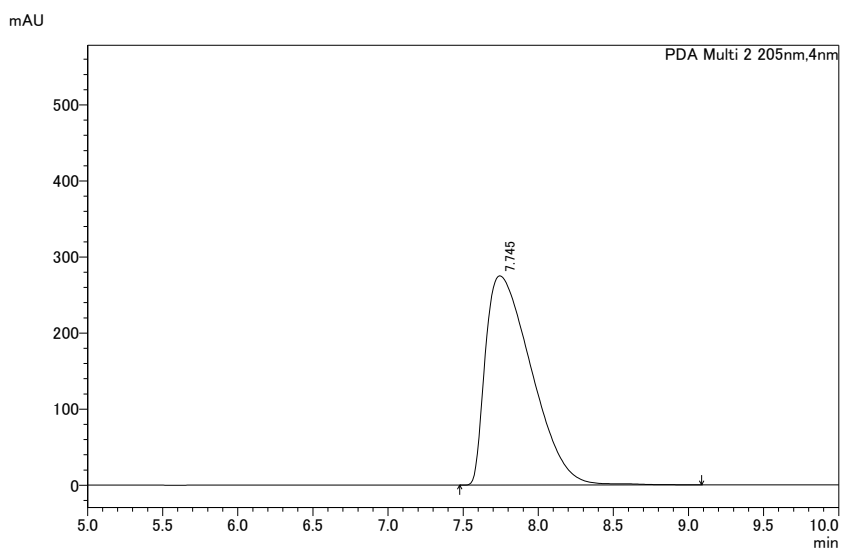

Peak Table

| Peak# | Ret. Time | Area    | Area%   |
|-------|-----------|---------|---------|
| 1     | 7.745     | 5860385 | 100.000 |
| Total |           | 5860385 | 100.000 |

## Boc- $\epsilon$ -HoGly-*rac*-Ala-*Ot*-Bu

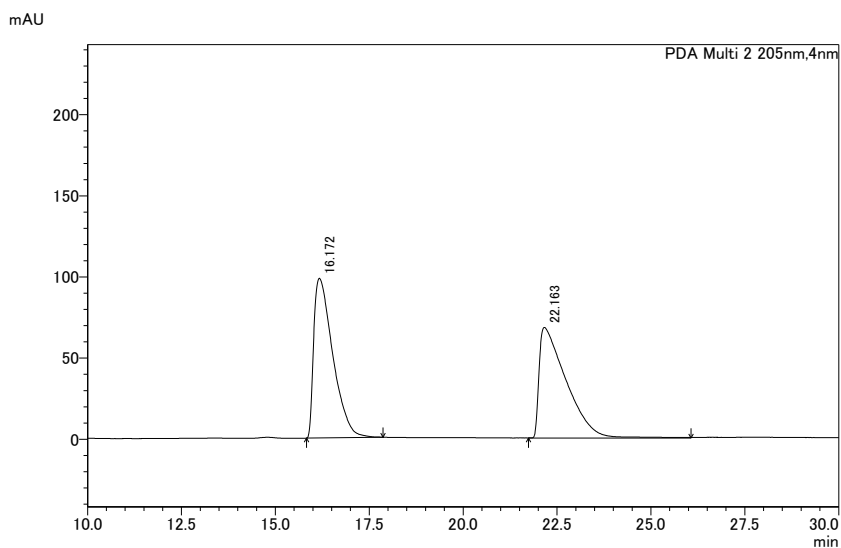

Peak Table

| Peak# | Ret. Time | Area    | Area%   |
|-------|-----------|---------|---------|
| 1     | 16.172    | 3466668 | 50.248  |
| 2     | 22.163    | 3432415 | 49.752  |
| Total |           | 6899083 | 100.000 |

16.172 min = Boc- $\epsilon$ -HoGly-D-Ala-*Ot*-Bu; 22.163 min = Boc- $\epsilon$ -HoGly-L-Ala-*Ot*-Bu

Conditions: 2-propanol/hexane = 4:96,  $\nu$  = 0.8 mL/min,  $\lambda$  = 205 nm, 40 °C

Chiral Column: IA-3 column from Daicel Chemical Ind., Ltd

## Boc- $\epsilon$ -HoGly-L-Ala-*Ot*-Bu (2j, Table 1)

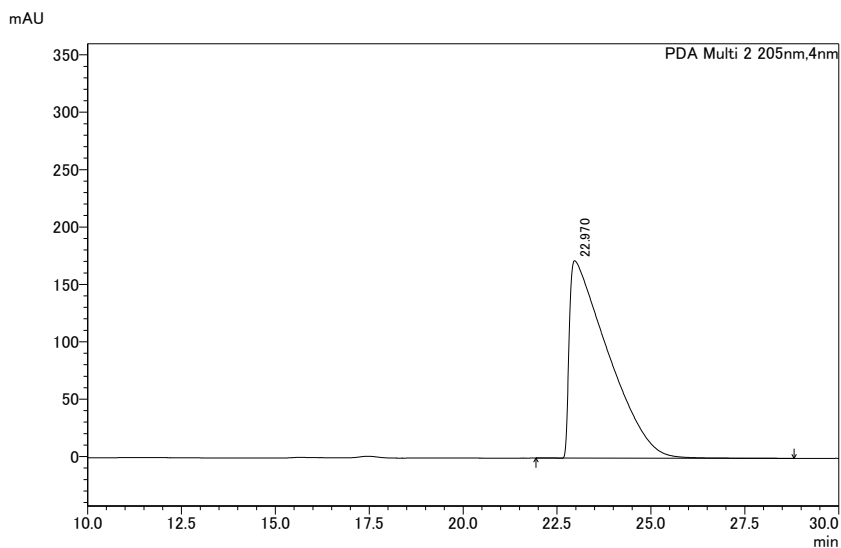

Peak Table

| Peak# | Ret. Time | Area     | Area%   |
|-------|-----------|----------|---------|
| 1     | 22.970    | 12357955 | 100.000 |
| Total |           | 12357955 | 100.000 |

## Boc- $\lambda$ -HoGly-*rac*-Ala-O $\iota$ -Bu

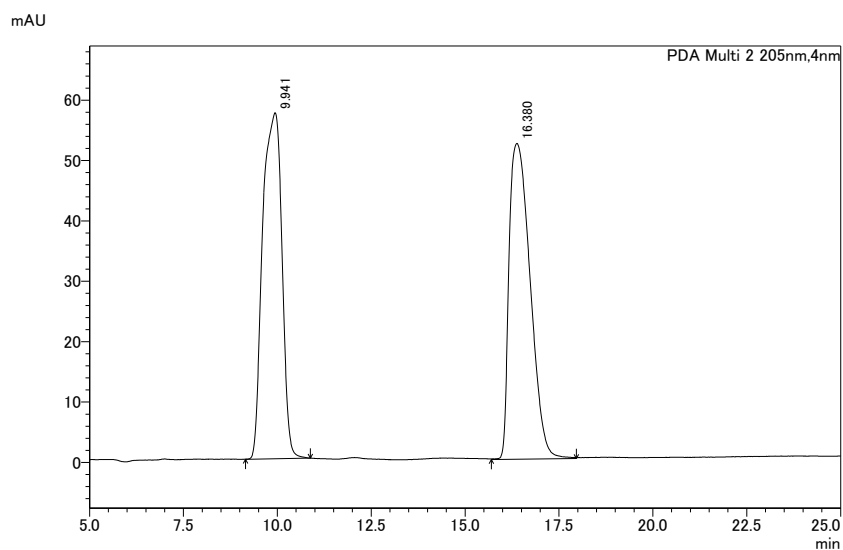

Peak Table

| Peak# | Ret. Time | Area    | Area%   |
|-------|-----------|---------|---------|
| 1     | 9.941     | 2043000 | 49.988  |
| 2     | 16.380    | 2043954 | 50.012  |
| Total |           | 4086955 | 100.000 |

9.941 min = Boc- $\lambda$ -HoGly-D-Ala-O $\iota$ -Bu; 16.380 min = Boc- $\lambda$ -HoGly-L-Ala-O $\iota$ -Bu

Conditions: 2-propanol/hexane = 5:95,  $\nu$  = 1.0 mL/min,  $\lambda$  = 205 nm, 40 °C

Chiral Column: IA-3 column from Daicel Chemical Ind., Ltd

## Boc- $\lambda$ -HoGly-L-Ala-O $\iota$ -Bu (2k, Table 1)

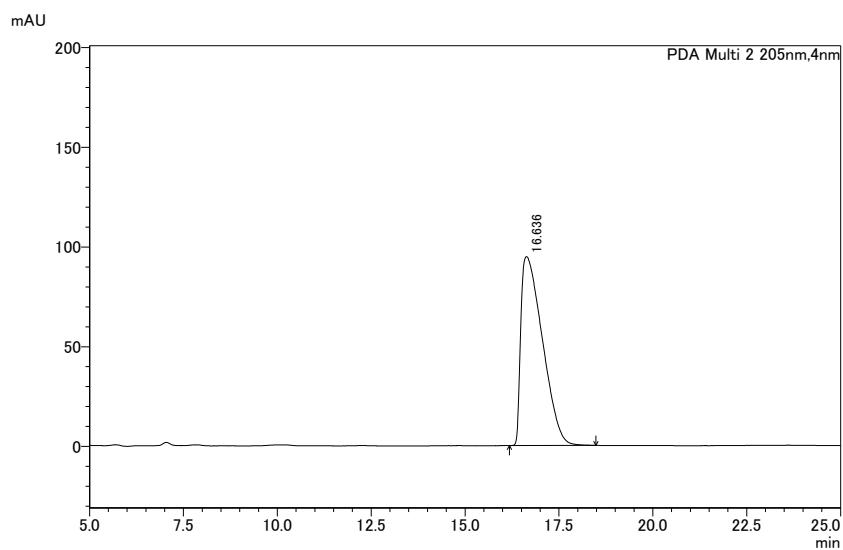

Peak Table

| Peak# | Ret. Time | Area    | Area%   |
|-------|-----------|---------|---------|
| 1     | 16.636    | 3789938 | 100.000 |
| Total |           | 3789938 | 100.000 |

## Boc-Gly-*rac*-Ala-O*t*-Bu

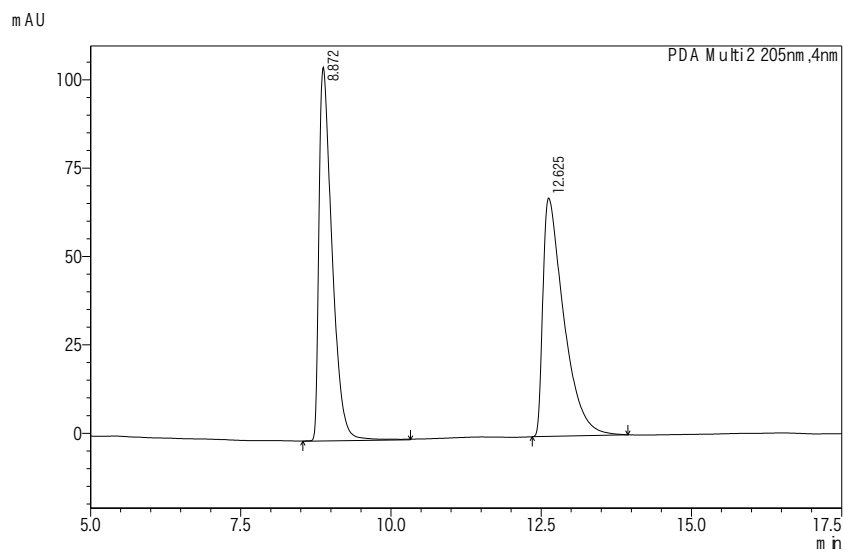

Peak Table

| Peak# | Ret. Time | Area    | Area%   |
|-------|-----------|---------|---------|
| 1     | 8.872     | 1605779 | 49.560  |
| 2     | 12.625    | 1634285 | 50.440  |
| Total |           | 3240064 | 100.000 |

8.872 min = Boc-Gly-D-Ala-O*t*-Bu; 12.625 min = Boc-Gly-L-Ala-O*t*-Bu  
Conditions: 2-propanol/hexane = 3:97,  $\nu$  = 1.5 mL/min,  $\lambda$  = 205 nm, 40 °C  
Chiral Column: IA-3 column from Daicel Chemical Ind., Ltd

## Boc-Gly-L-Ala-O*t*-Bu (4kb, Scheme 2)

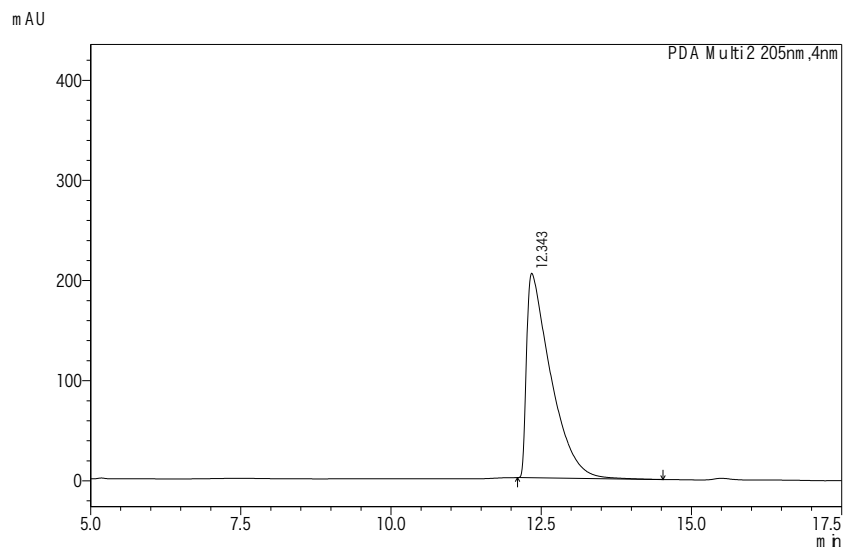

Peak Table

| Peak# | Ret. Time | Area    | Area%   |
|-------|-----------|---------|---------|
| 1     | 12.343    | 5733022 | 100.000 |
| Total |           | 5733022 | 100.000 |

## Boc-*rac*-Ala-*rac*-Ala-*OT*-Bu

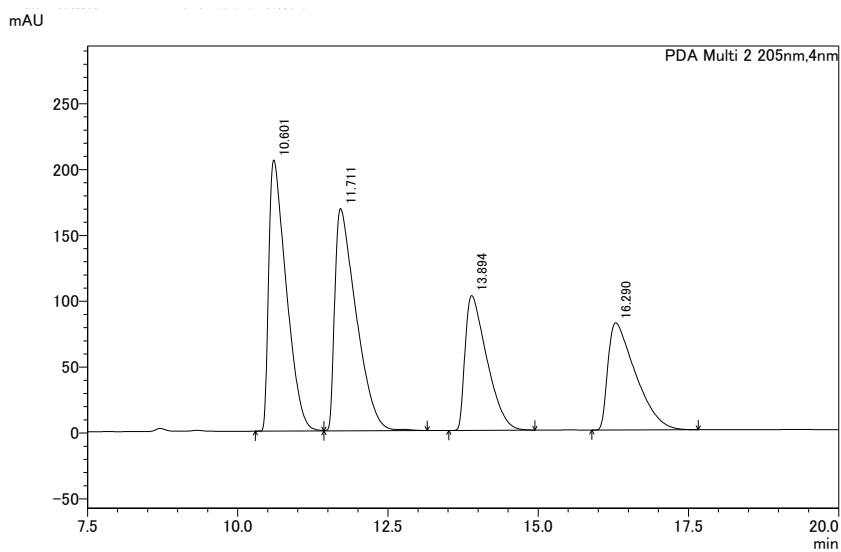

Peak Table

| Peak# | Ret. Time | Area     | Area%   |
|-------|-----------|----------|---------|
| 1     | 10.601    | 4167761  | 30.863  |
| 2     | 11.711    | 4161467  | 30.816  |
| 3     | 13.894    | 2572053  | 19.047  |
| 4     | 16.290    | 2602764  | 19.274  |
| Total |           | 13504045 | 100.000 |

10.601 min = Boc-L-Ala-L-Ala-*OT*-Bu; 11.711 min = Boc-D-Ala-D-Ala-*OT*-Bu

13.894 min = Boc-L-Ala-D-Ala-*OT*-Bu; 16.290 min = Boc-D-Ala-L-Ala-*OT*-Bu

Conditions: 2-propanol/hexane = 5:95,  $\nu$  = 1.5 mL/min,  $\lambda$  = 205 nm, 40 °C

Chiral Column: IE-3 column from Daicel Chemical Ind., Ltd

## Boc-L-Ala-L-Ala-*OT*-Bu (4l, Scheme 2)

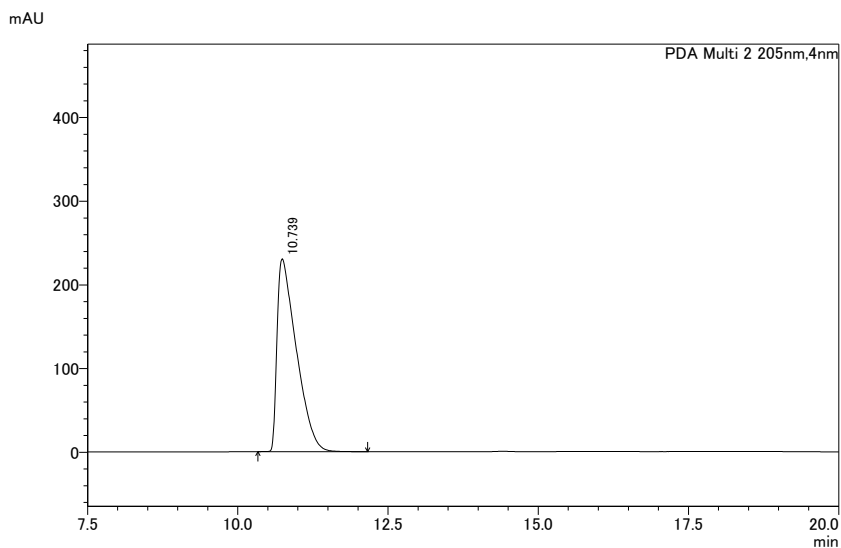

Peak Table

| Peak# | Ret. Time | Area    | Area%   |
|-------|-----------|---------|---------|
| 1     | 10.739    | 5153218 | 100.000 |
| Total |           | 5153218 | 100.000 |

## Boc-Gly-*rac*-Val-*Ot*-Bu

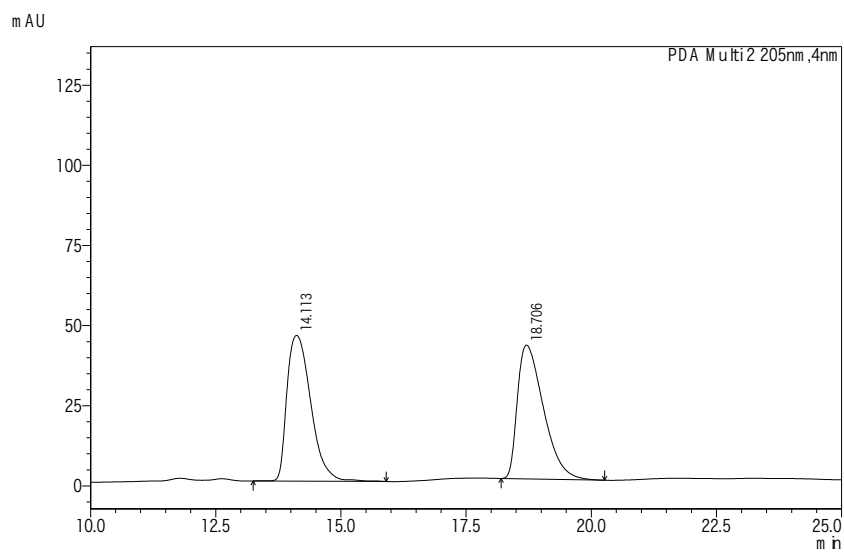

Peak Table

| Peak# | Ret. Time | Area    | Area%   |
|-------|-----------|---------|---------|
| 1     | 14.113    | 1510265 | 49.939  |
| 2     | 18.706    | 1513968 | 50.061  |
| Total |           | 3024233 | 100.000 |

14.113 min = Boc-Gly-D-Val-*Ot*-Bu; 18.706 min = Boc-Gly-L-Val-*Ot*-Bu  
Conditions: 2-propanol/hexane = 2:98,  $\nu$  = 1.5 mL/min,  $\lambda$  = 205 nm, 40 °C  
Chiral Column: IA-3 column from Daicel Chemical Ind., Ltd

## Boc-Gly-L-Val-*Ot*-Bu (4kc, Scheme 2)

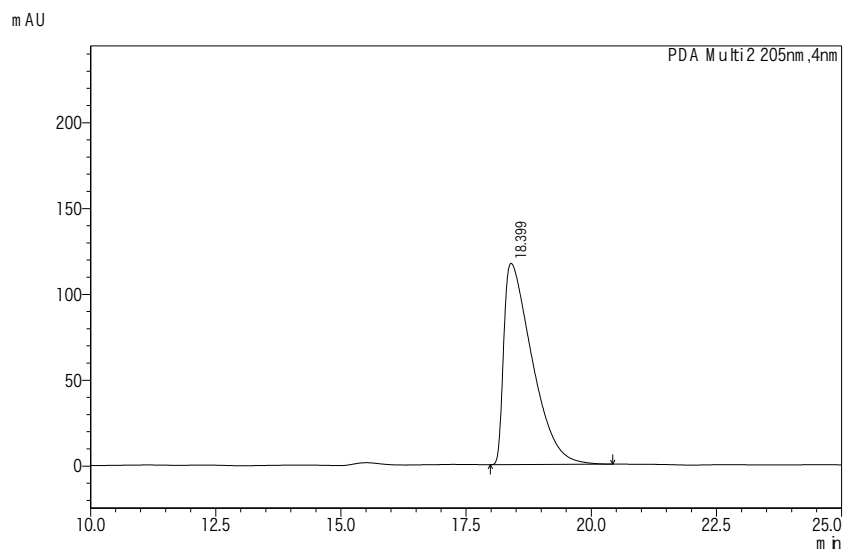

Peak Table

| Peak# | Ret. Time | Area    | Area%   |
|-------|-----------|---------|---------|
| 1     | 18.399    | 4621090 | 100.000 |
| Total |           | 4621090 | 100.000 |



## Boc-Gly-Gly-*rac*-Ala-*Ot*-Bu

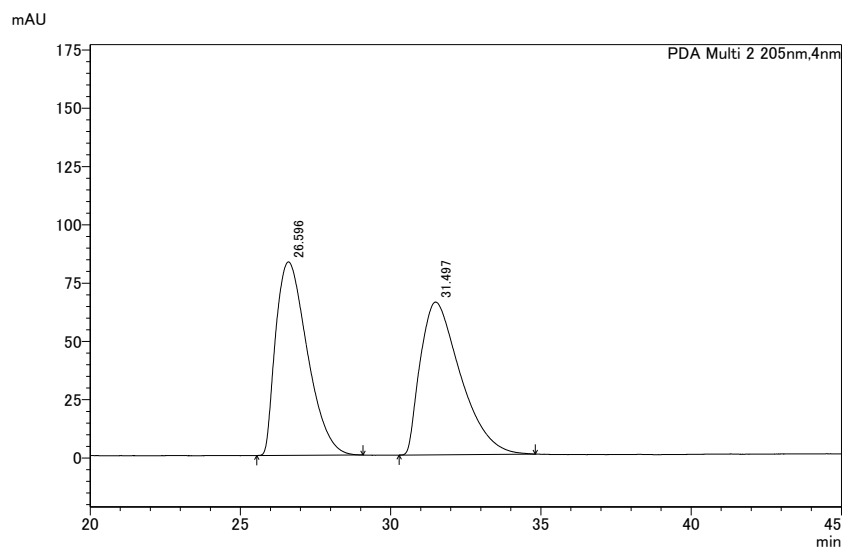

Peak Table

| Peak# | Ret. Time | Area     | Area%   |
|-------|-----------|----------|---------|
| 1     | 26.596    | 6066032  | 49.908  |
| 2     | 31.497    | 6088485  | 50.092  |
| Total |           | 12154517 | 100.000 |

26.596 min = Boc-Gly-Gly-D-Ala-*Ot*-Bu; 31.497 min = Boc-Gly-Gly-L-Ala-*Ot*-Bu

Conditions: 2-propanol/hexane = 7:93,  $\nu$  = 1.5 mL/min,  $\lambda$  = 205 nm, 40 °C

Chiral Column: IG-3 column from Daicel Chemical Ind., Ltd

## Boc-Gly-Gly-L-Ala-*Ot*-Bu (6aa, Scheme 3)

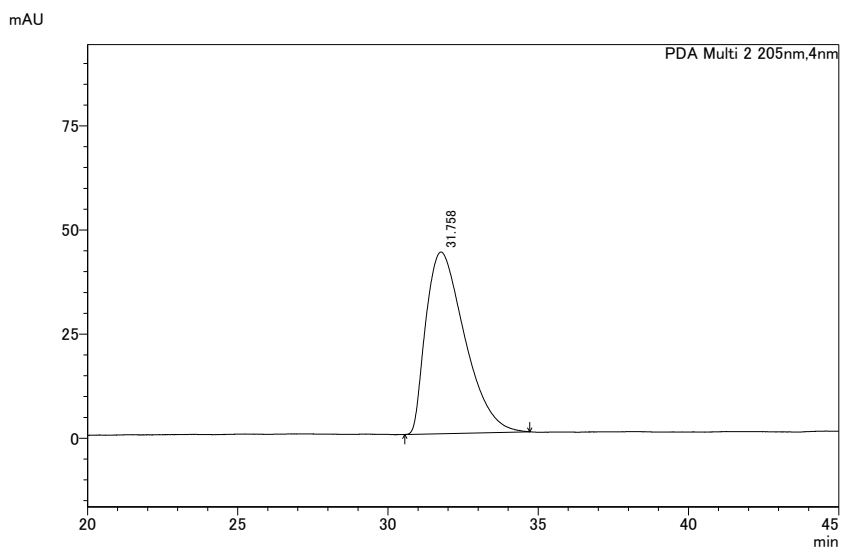

Peak Table

| Peak# | Ret. Time | Area    | Area%   |
|-------|-----------|---------|---------|
| 1     | 31.758    | 3916898 | 100.000 |
| Total |           | 3916898 | 100.000 |

## S92

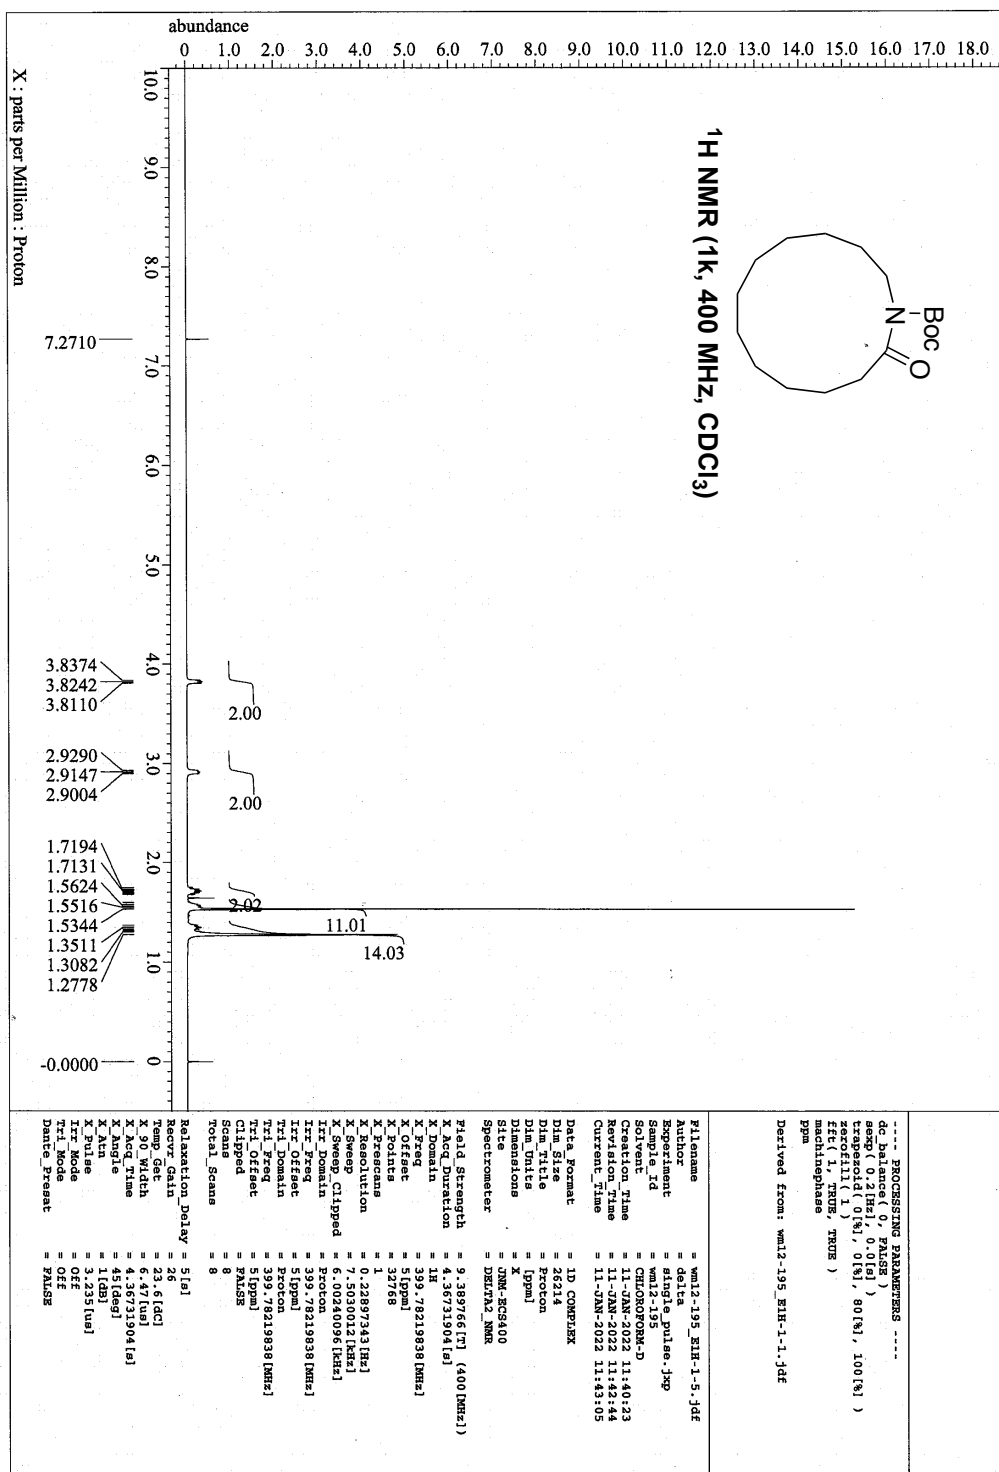





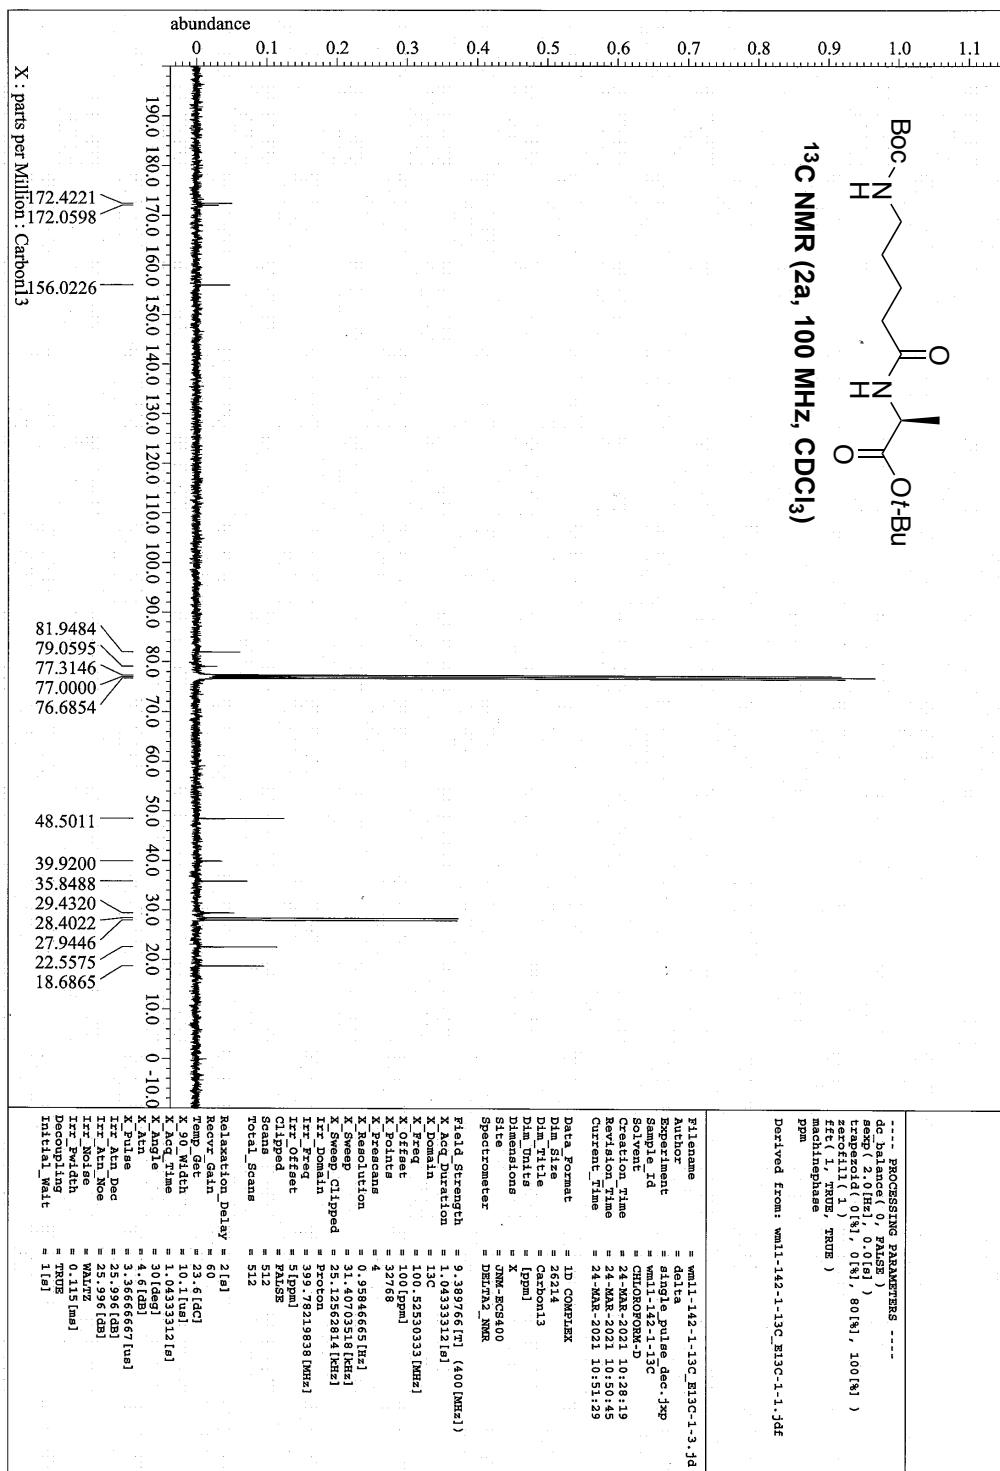



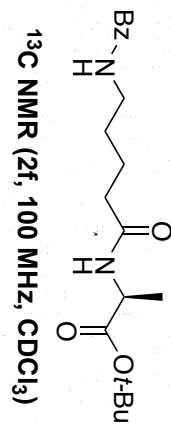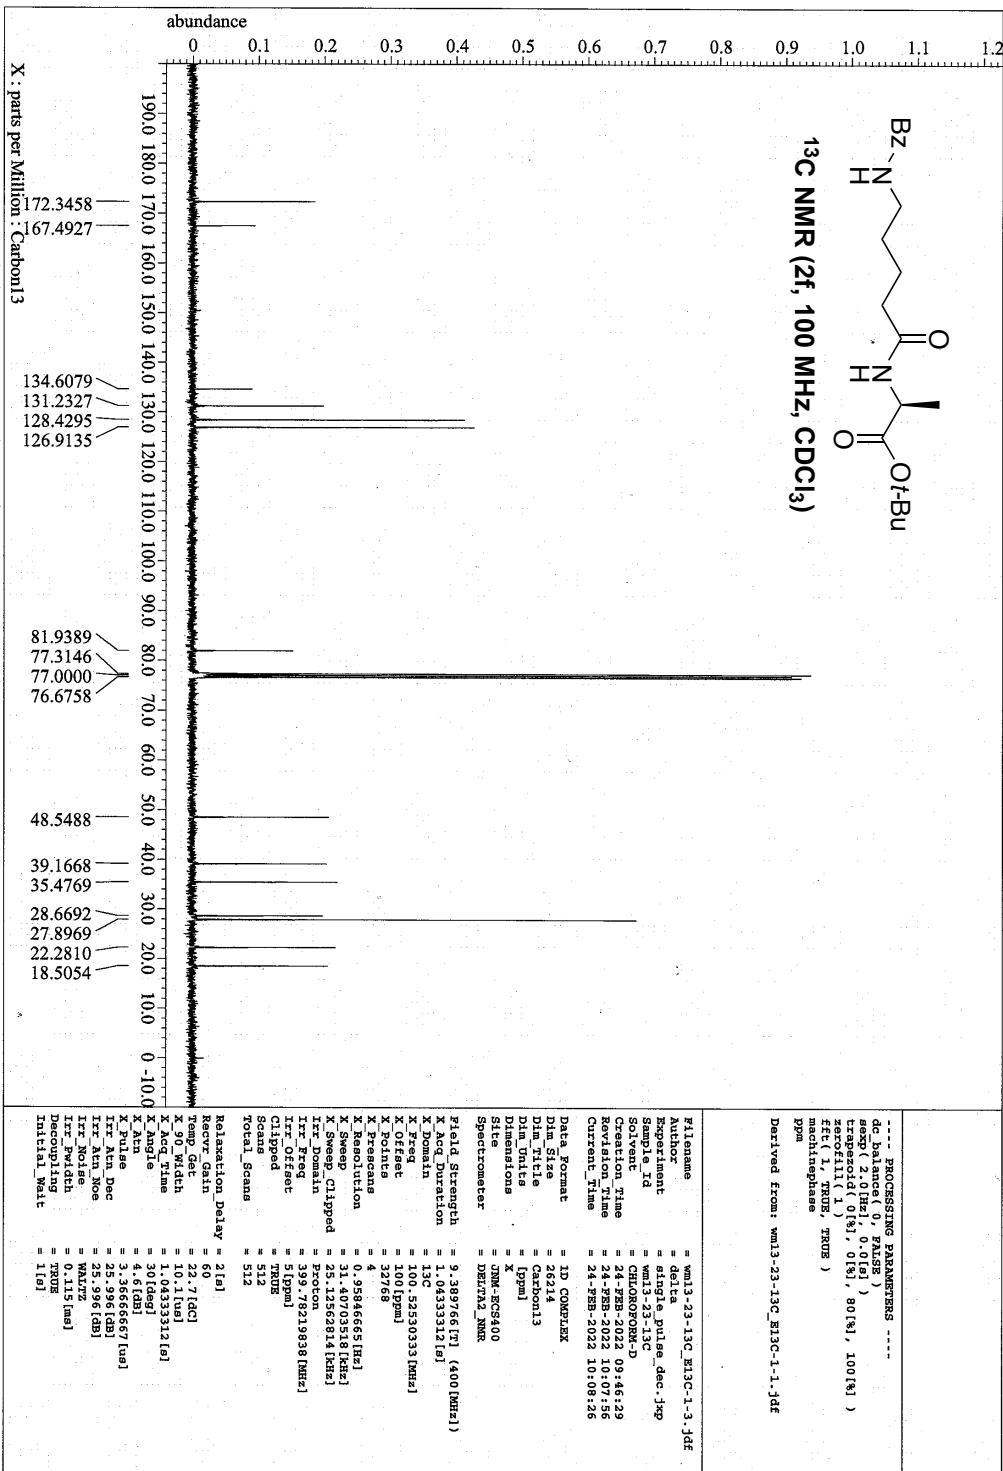







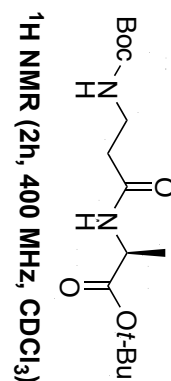<sup>1</sup>H NMR (2h, 400 MHz, CDCl<sub>3</sub>)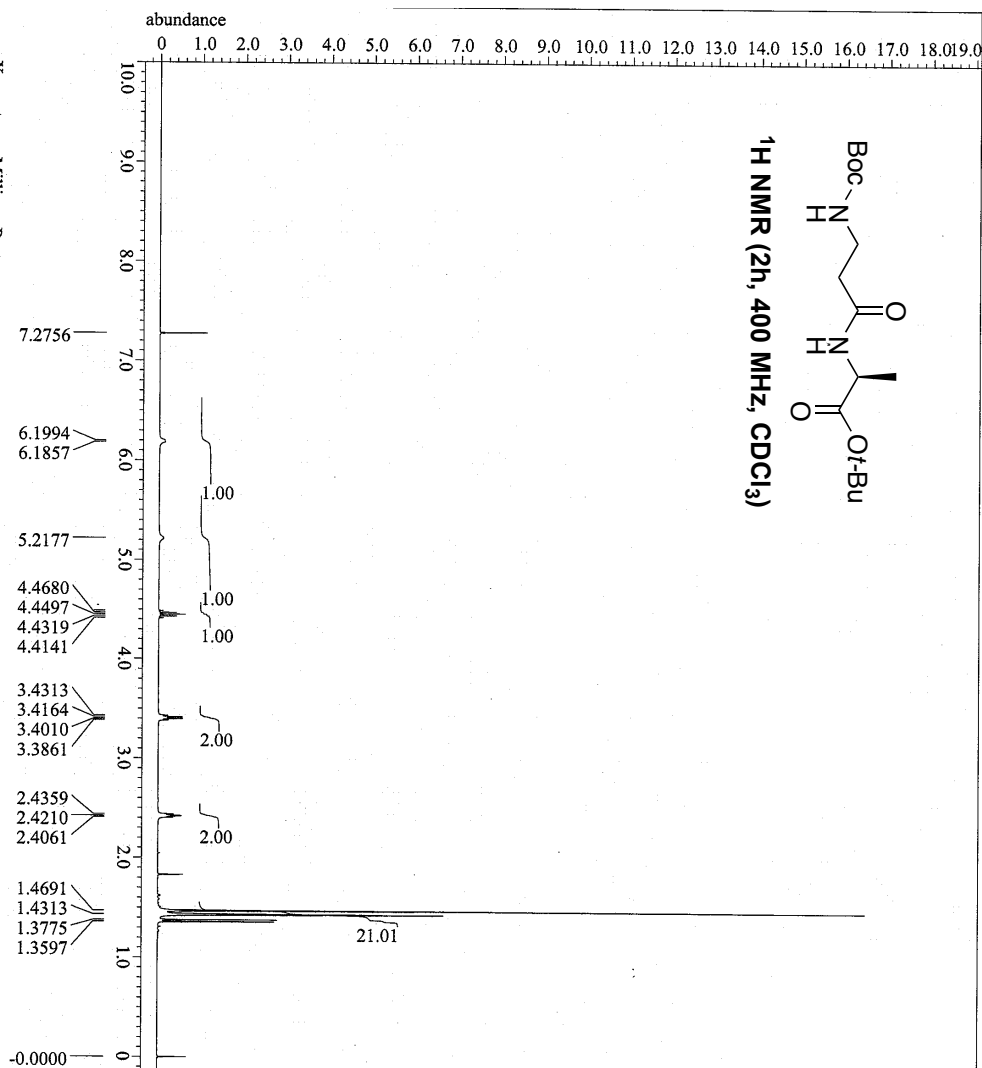

X : parts per Million : Proton

```

      ----- PROCESSING PARAMETERS -----
      dc balance ( 0 , FALSE )
      sexp ( 0.2 [Hz] , 0.0 [s] )
      trapezoid ( 0 [%] , 0 [%] , 80 [%] , 100 [%] )
      zeocfill ( 1 )
      ffc ( 1 , TRUE , TRUE )
      machinephase
      ppm
Derived from: wml2-200-1_E1H-1-1.jdf

```

|                  |                         |
|------------------|-------------------------|
| Filename         | wm12-200-1_EH-1-4_3d    |
| Author           | delta                   |
| Experiment       | single_pulse.jpg        |
| Sample_ID        | wm12-200-1              |
| Sample_Path      | wm12-200-1.D            |
| Creation_Time    | 19-JUN-2022 13:33:51    |
| Revision         | 19-JUN-2022 13:34:49    |
| Current_Time     | 19-JUN-2022 13:35:09    |
| Data_Format      | ID COMPLEX              |
| Data_Size        | 26214                   |
| File_Path        | proton                  |
| File_Type        | [pnm]                   |
| Dimensions       | X=1 Y=1                 |
| Size             | JMN-BCS400              |
| Spectrometer     | DELTA2_NMR              |
| Field_Strength   | 9.3897661(T) [400(MHz)] |
| Acq_Duration     | 1.156731504[s]          |
| X_Deg            | 0                       |
| X_Phi            | 399.78219838 [MHz]      |
| X_Offset         | 32766                   |
| X_Points         | 5 [ppm]                 |
| X_Resolution     | 1                       |
| X_Frequency      | 0.23897343 [Hz]         |
| X_Sweep          | 7.5030012 [KHz]         |
| X_Scan           | Proton [999.9996] [MHz] |
| Ir_Domain        | 399.78219838 [MHz]      |
| Ir_Freq          | 5 [ppm]                 |
| Ir_Offset        | Proton                  |
| T1_Domain        | 399.78219838 [MHz]      |
| T1_Freq          | 5 [ppm]                 |
| T1_Offset        | 8                       |
| Clipped          | FALSE                   |
| Total_Scans      | 8                       |
| Relaxation_Delay | 5 [s]                   |
| Recovery_Gain    | 30                      |
| Temp_Deg         | 24 [C]                  |
| Temp_Path        | 6.4 [mu]                |
| Temp_Rate        | 1.156731504 [s]         |
| X_Angle          | 45 [deg]                |
| X_Axis           | 1 [mm]                  |
| X_Pulse          | 3.235 [us]              |
| Ir_Mode          | OFF                     |
| T1_Mode          | OFF                     |
| Phase_Preset     | FALSE                   |

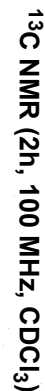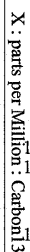

Derived from: wm12-200-1-13C\_E13C-1-1.jdd

Initial Wait = 1 [s]

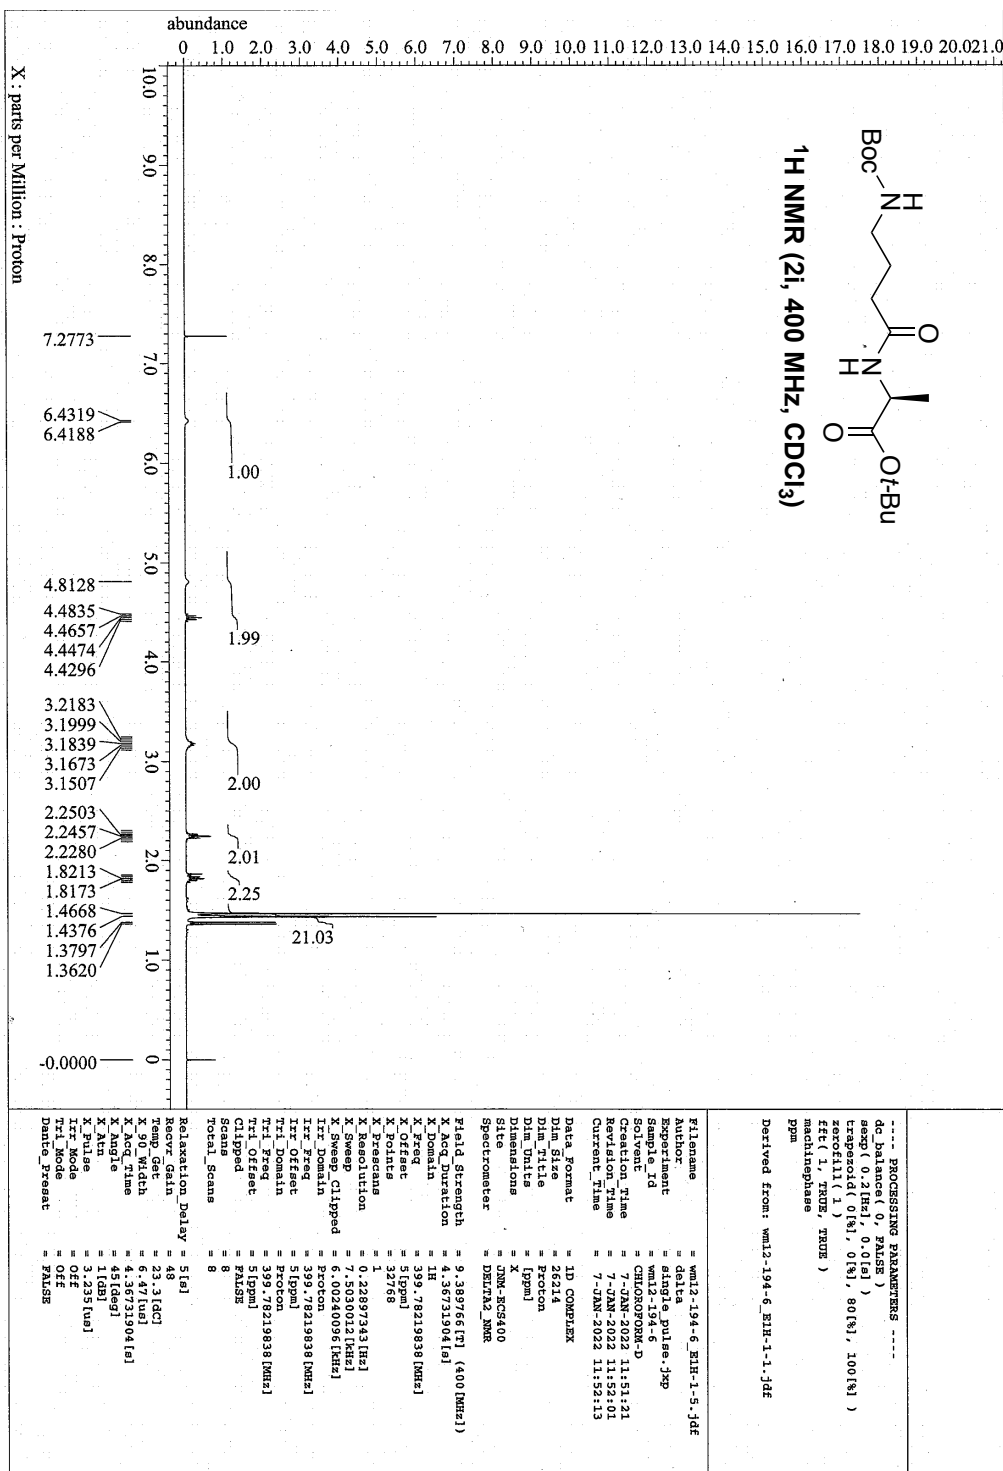

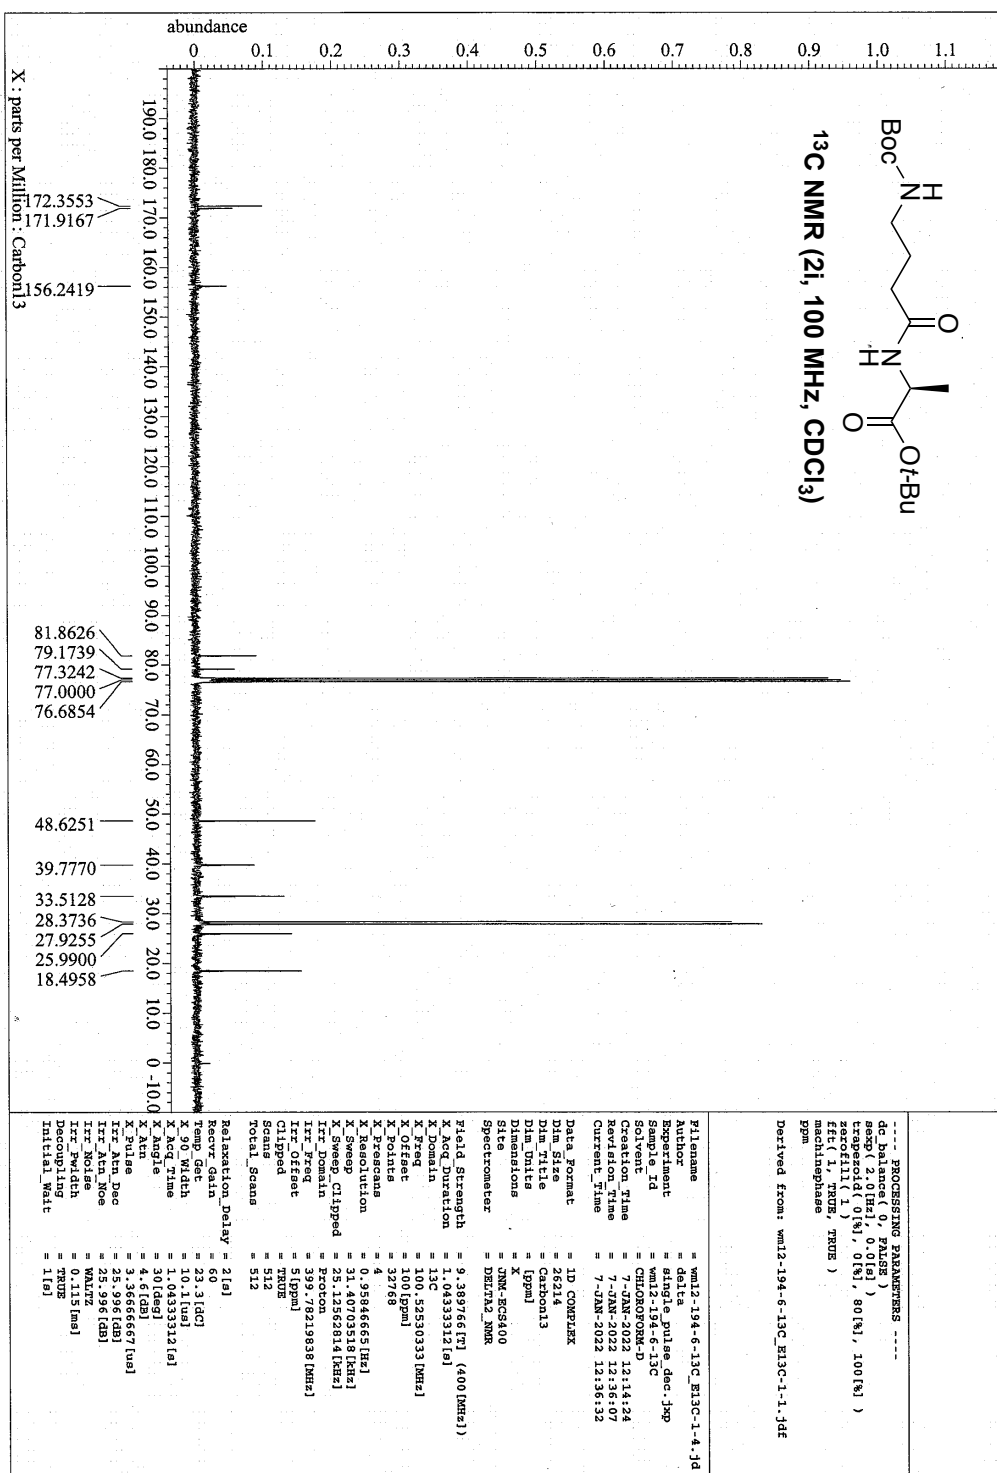

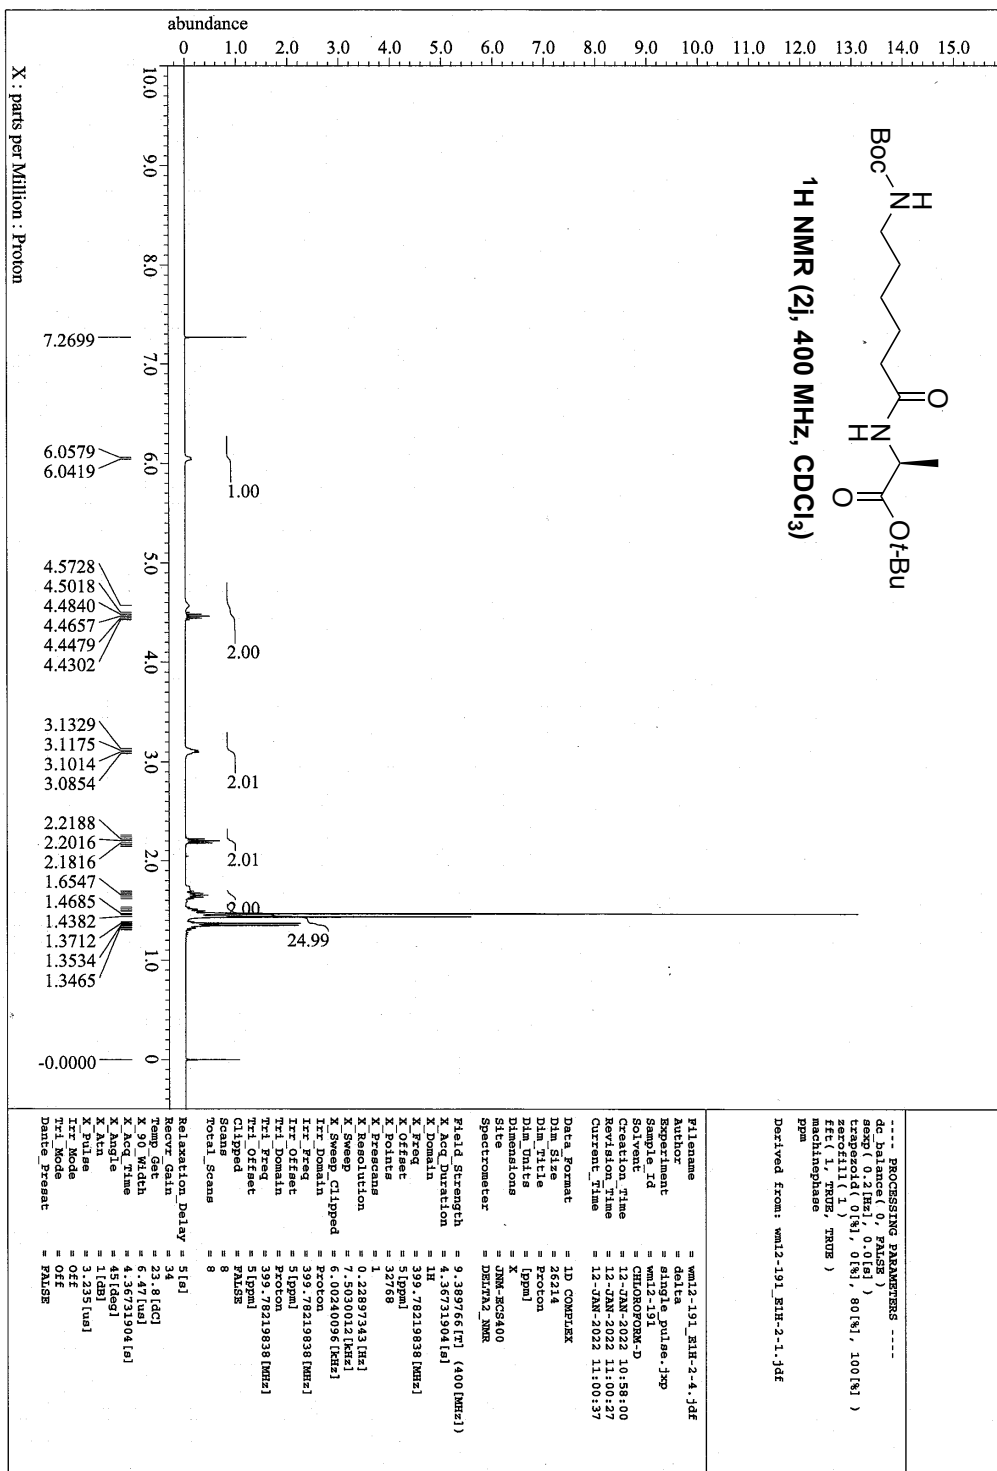







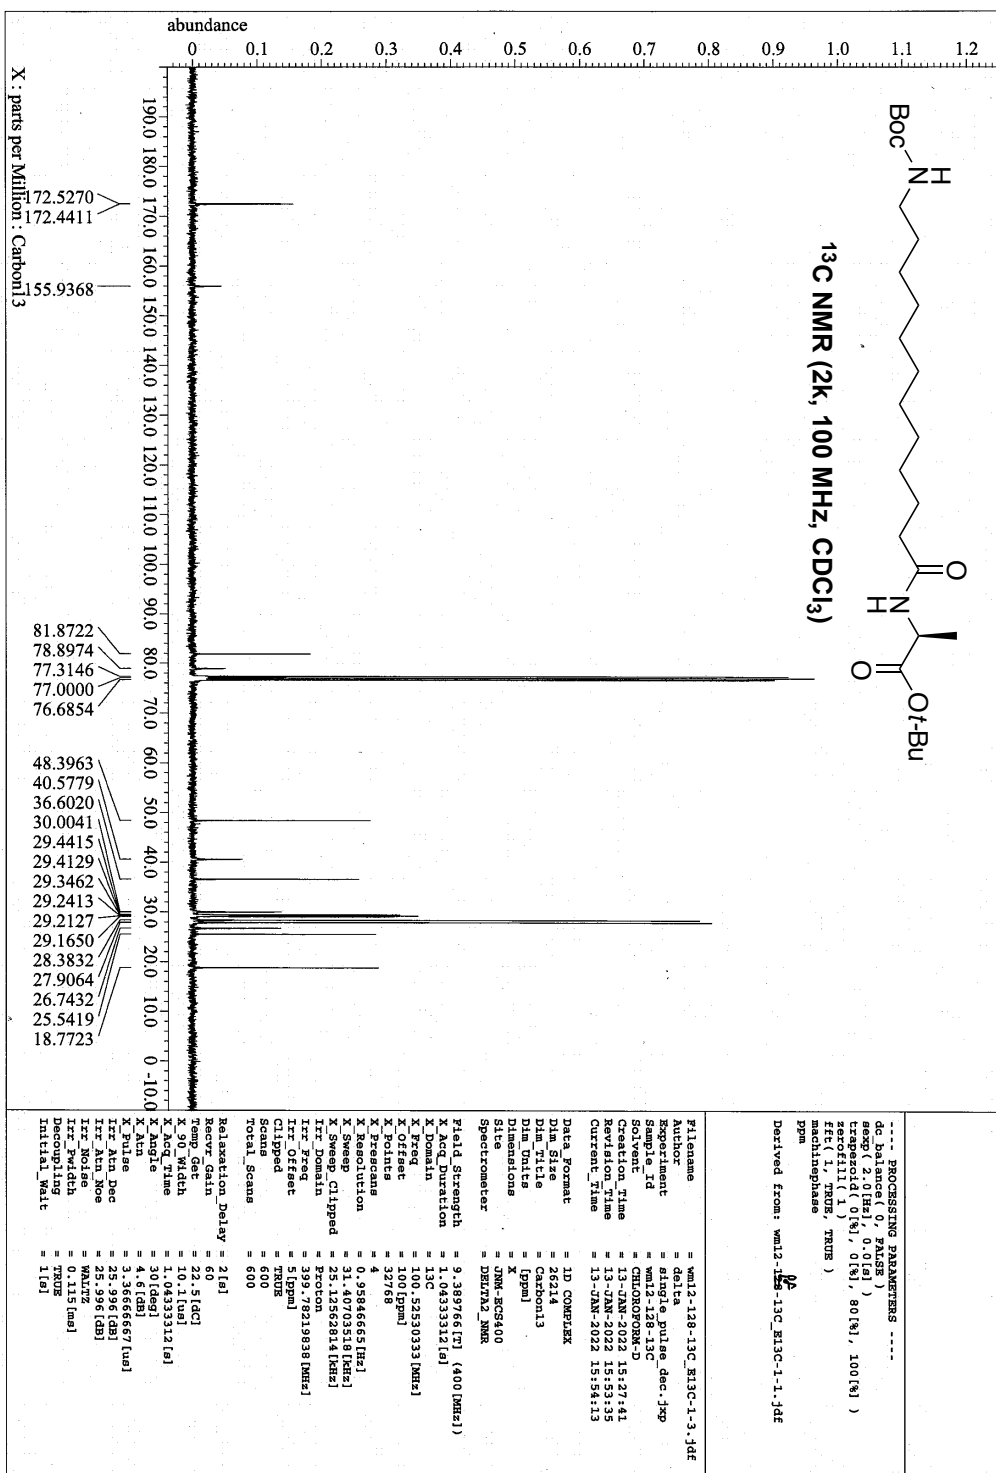

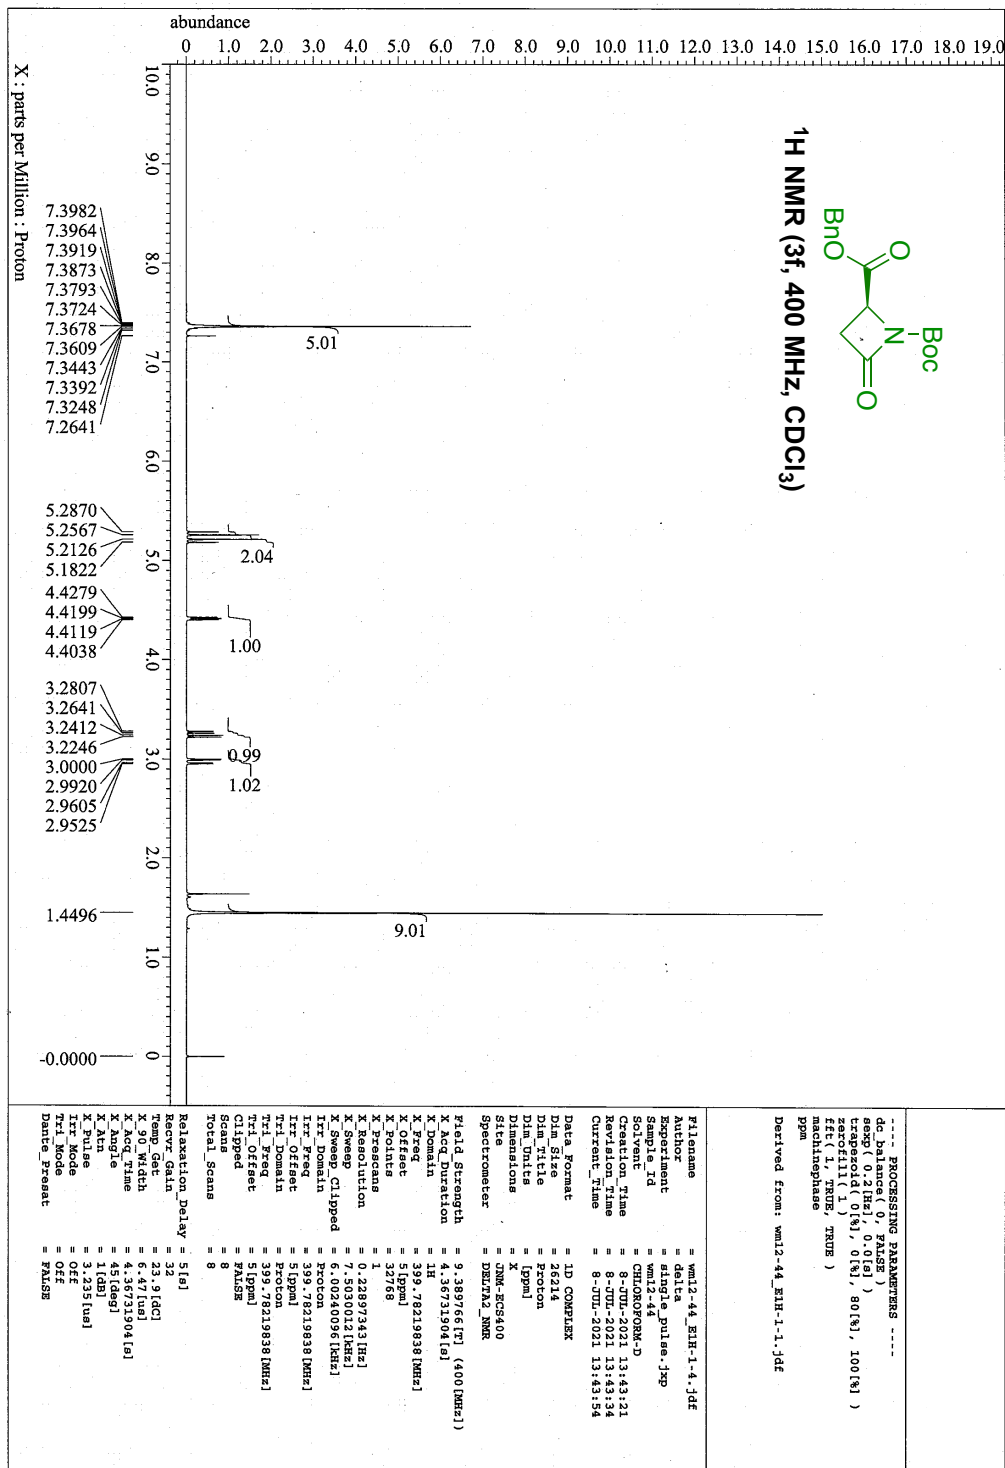

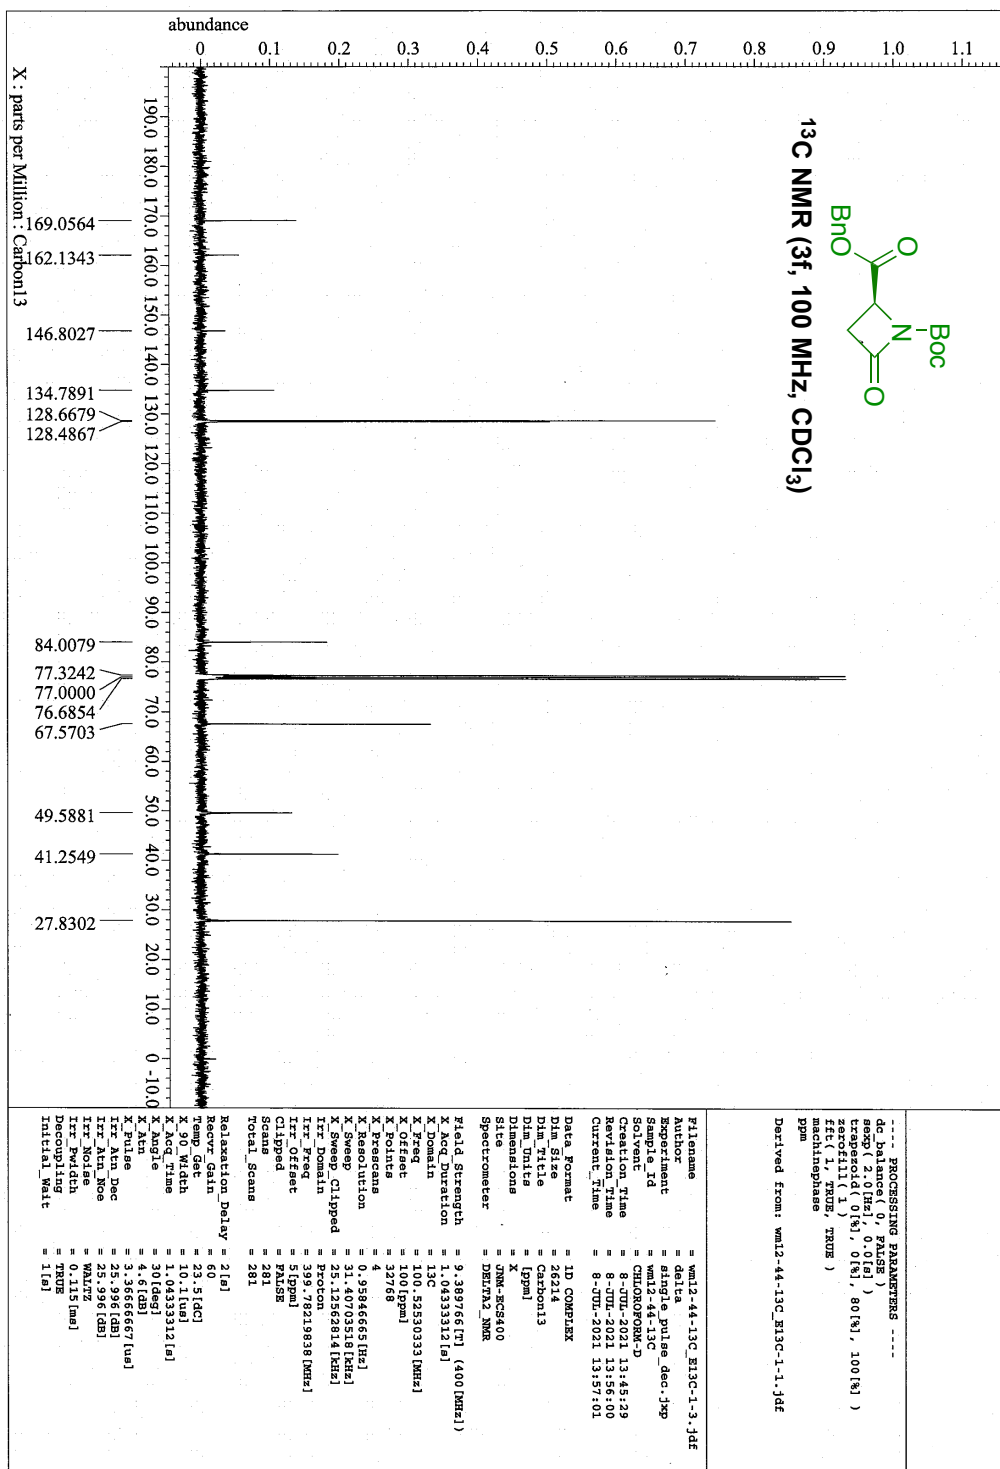

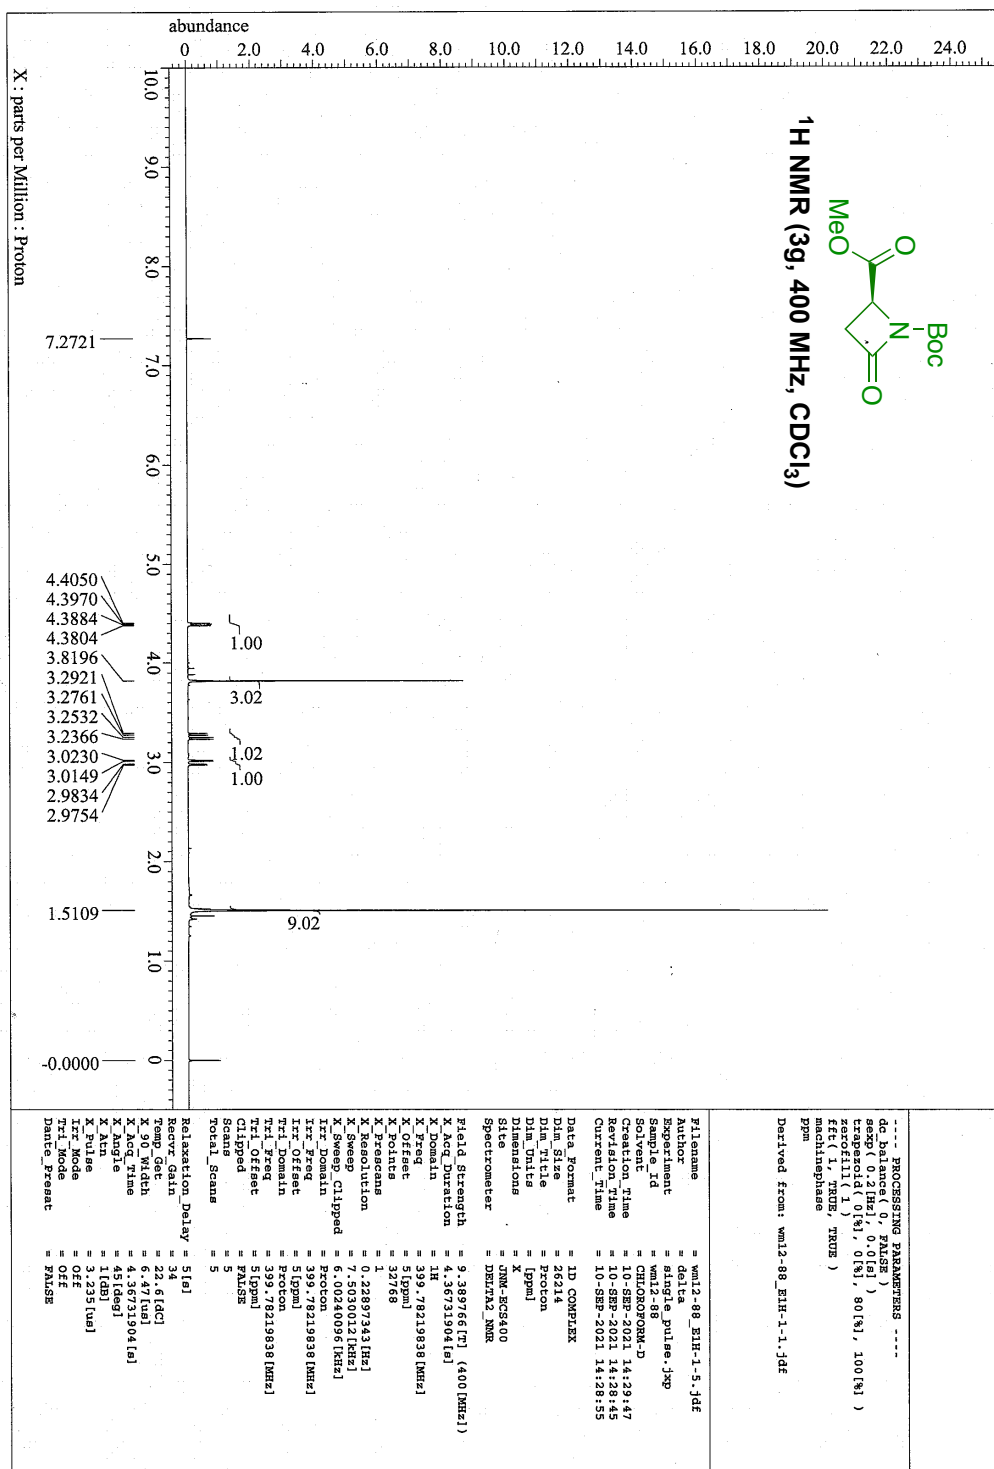

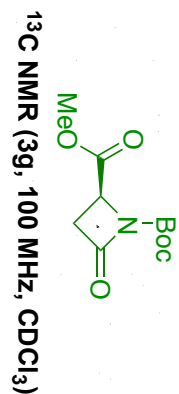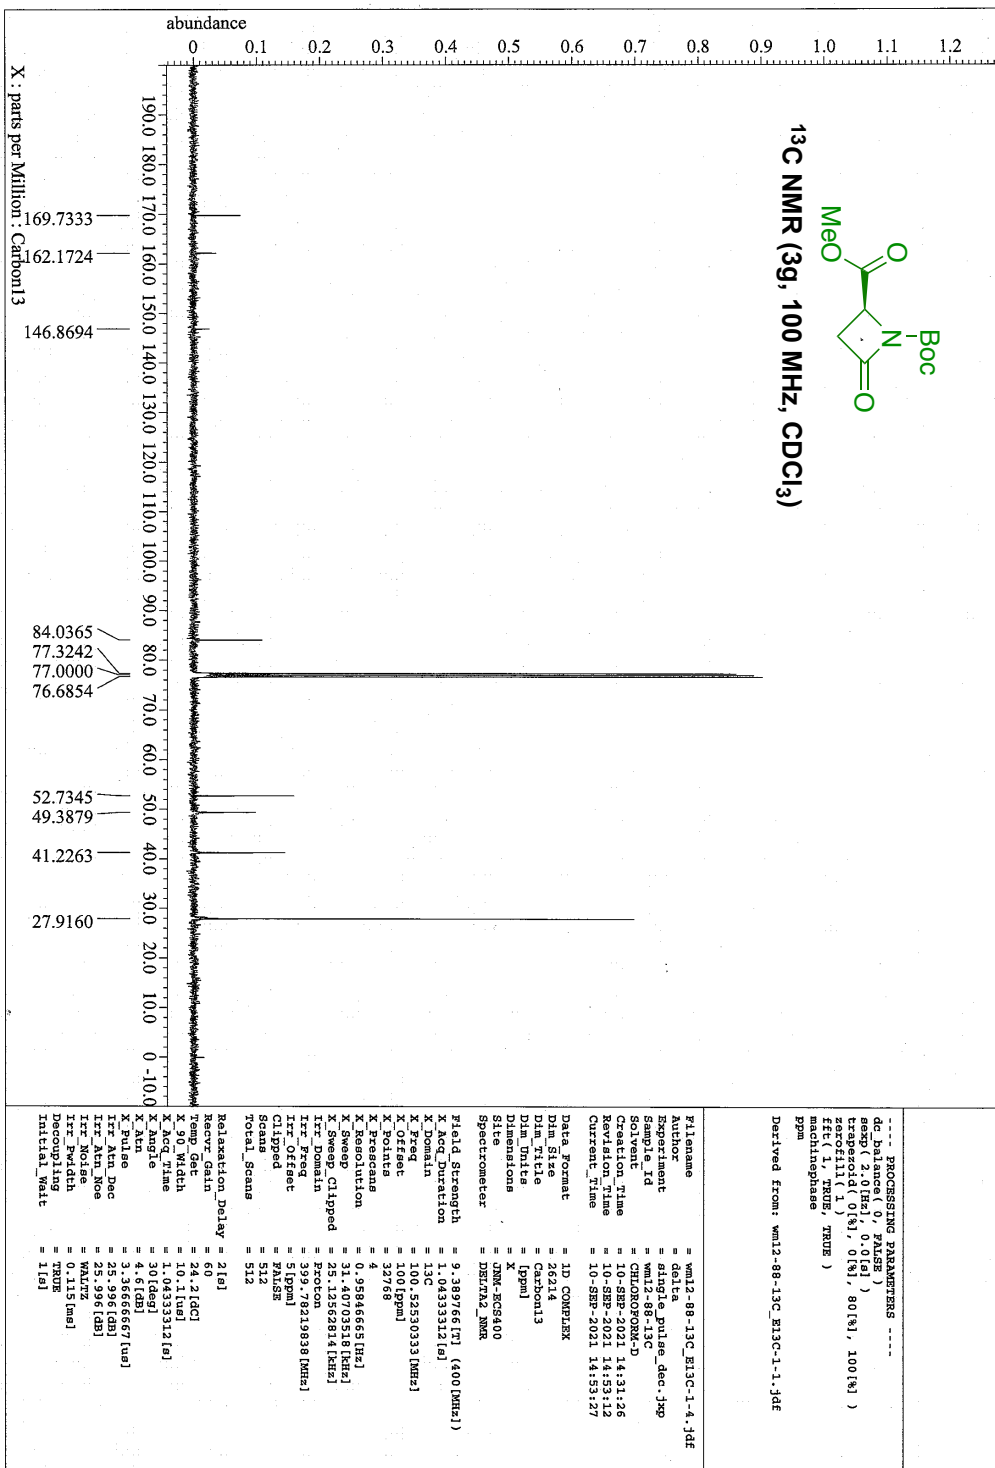









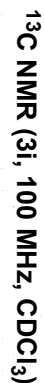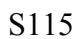

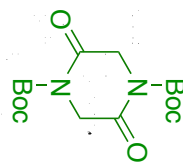

**<sup>1</sup>H NMR (3k, 400 MHz, CDCl<sub>3</sub>)**

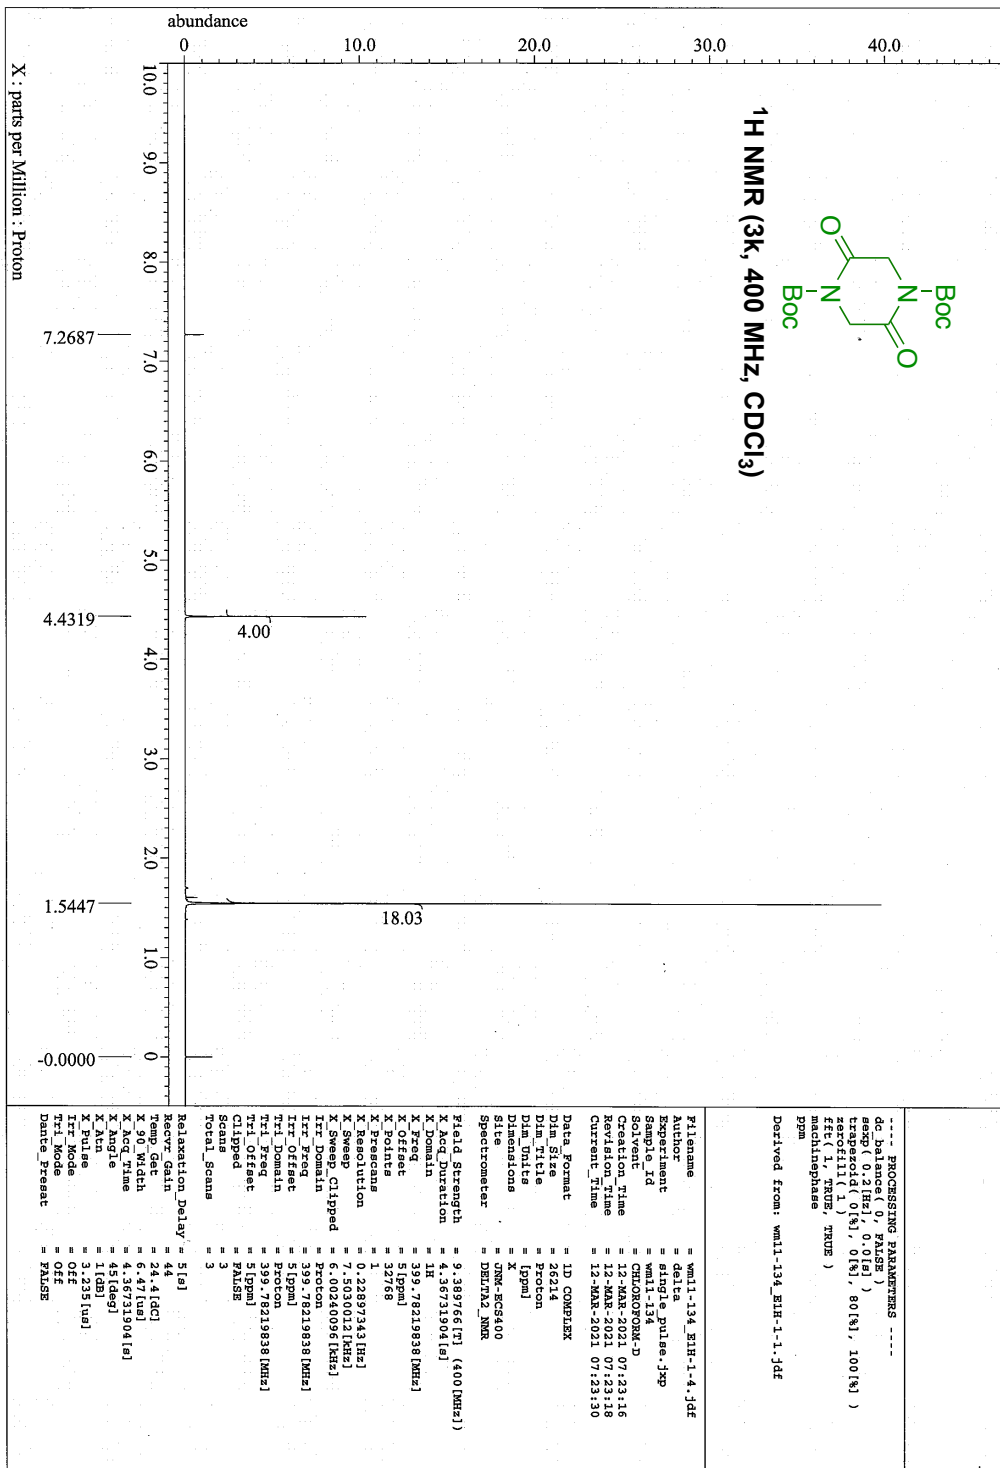

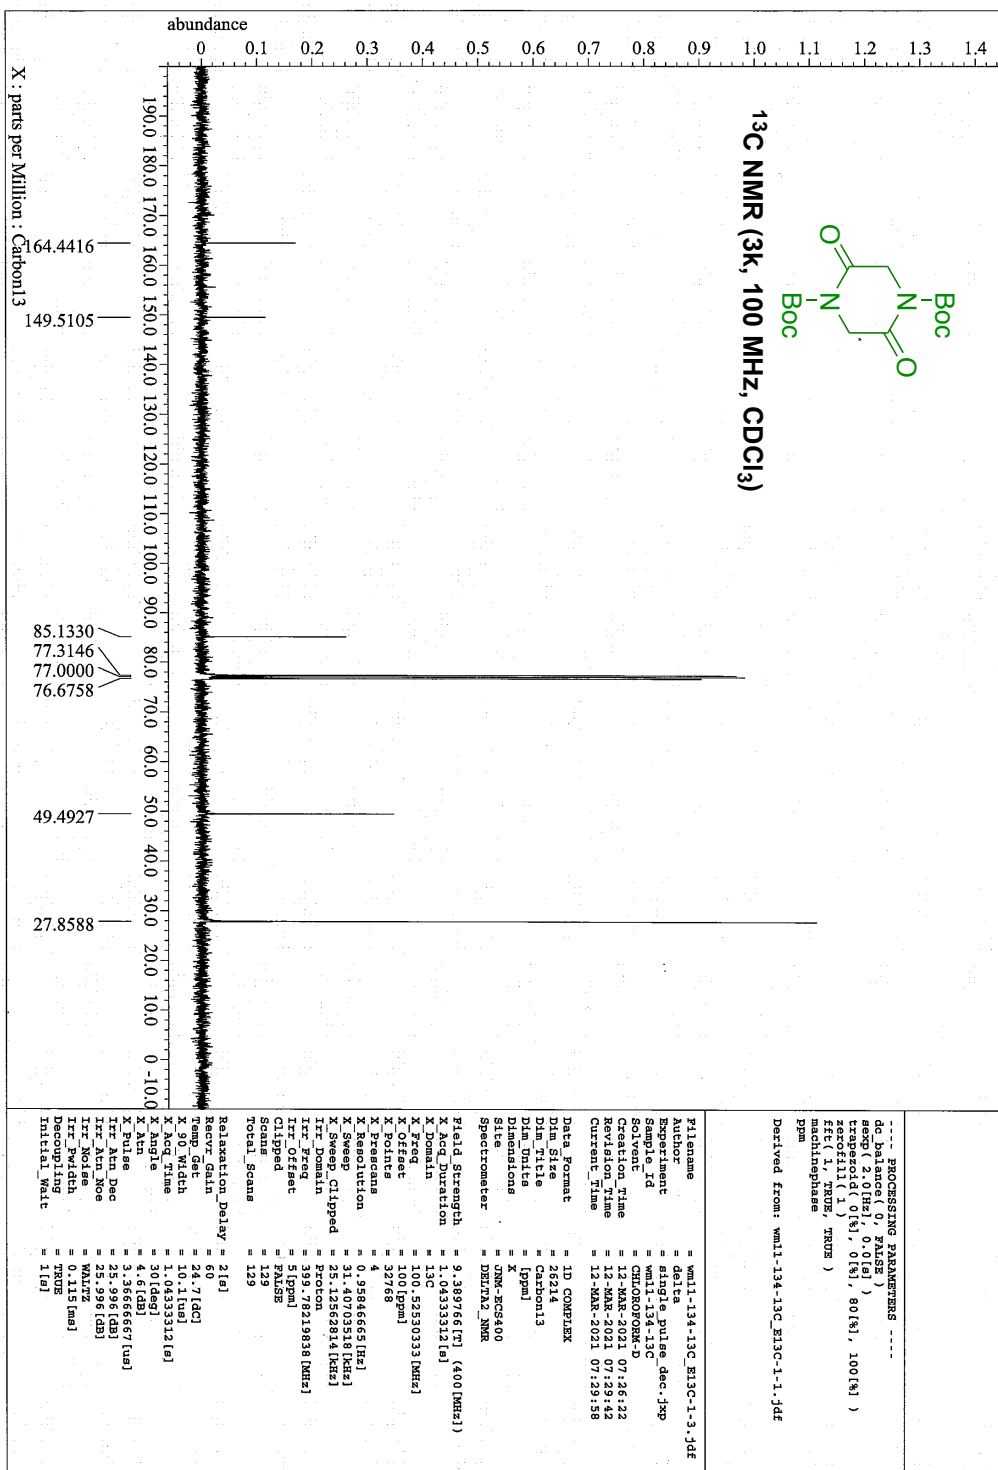

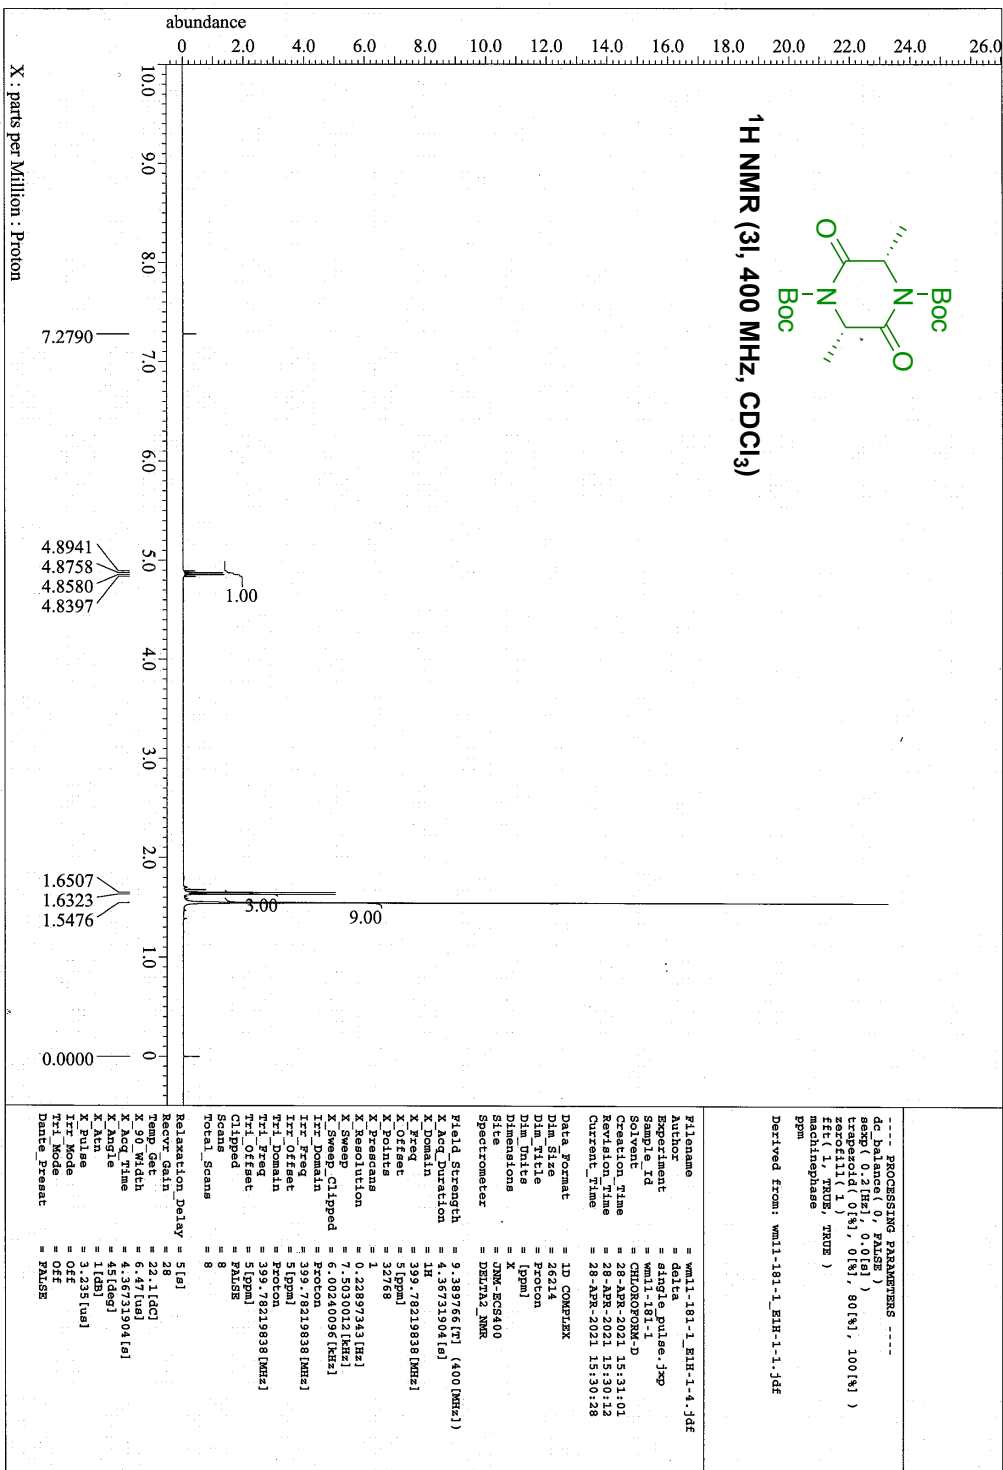













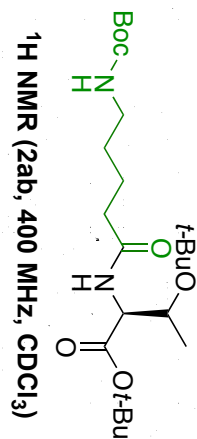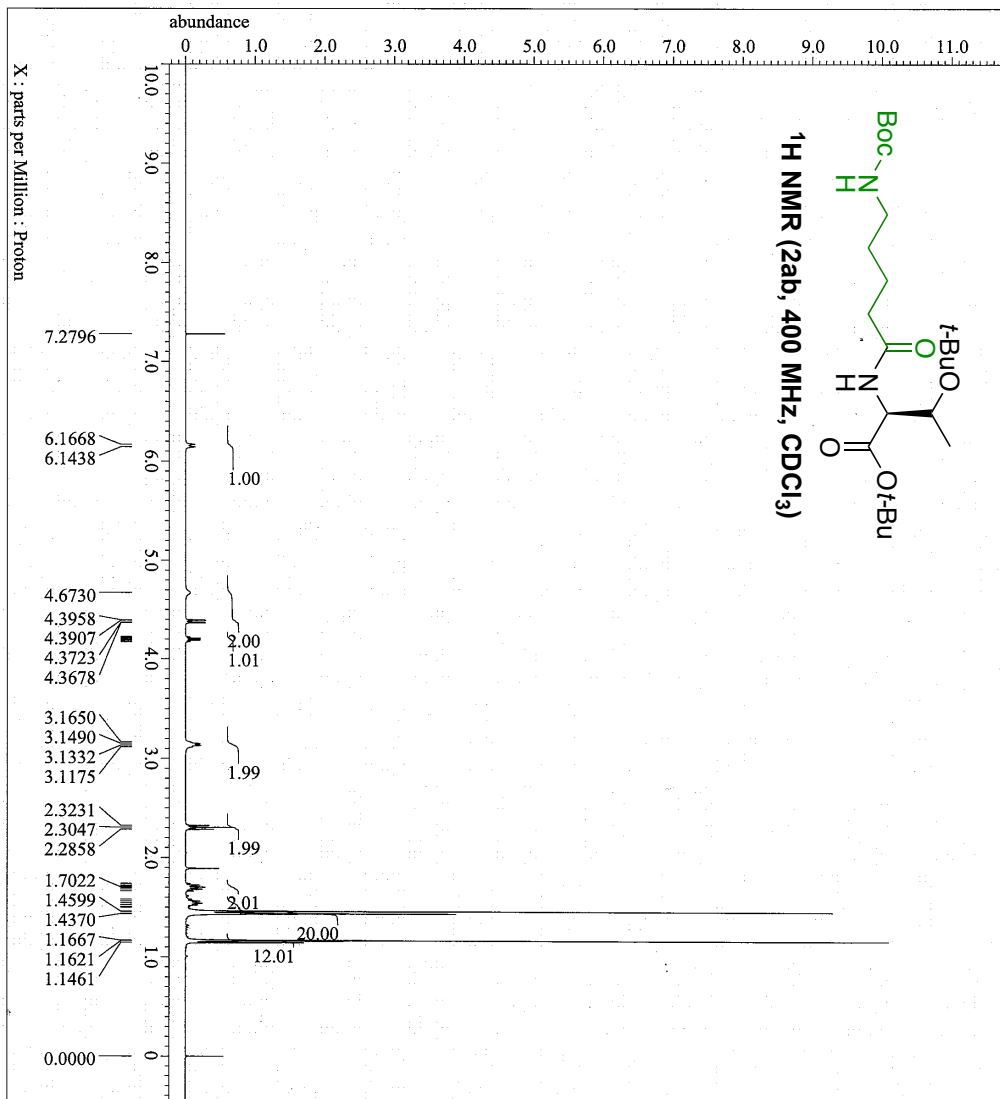

```

----- PROCESSING PARAMETERS -----
dc balance ( 0, FALSE )
sweep ( 0.2 [Hz], 0.0 [s] )
timestepold ( 0 [s], 0 [s], 80 [s], 100 [s] )
zerofill ( 1 )
fft ( 1, TRUE, TRUE )
machnephase
ppm

Derived from: wm12-10-2_E1H-1-1.jdf

```

[illegible]



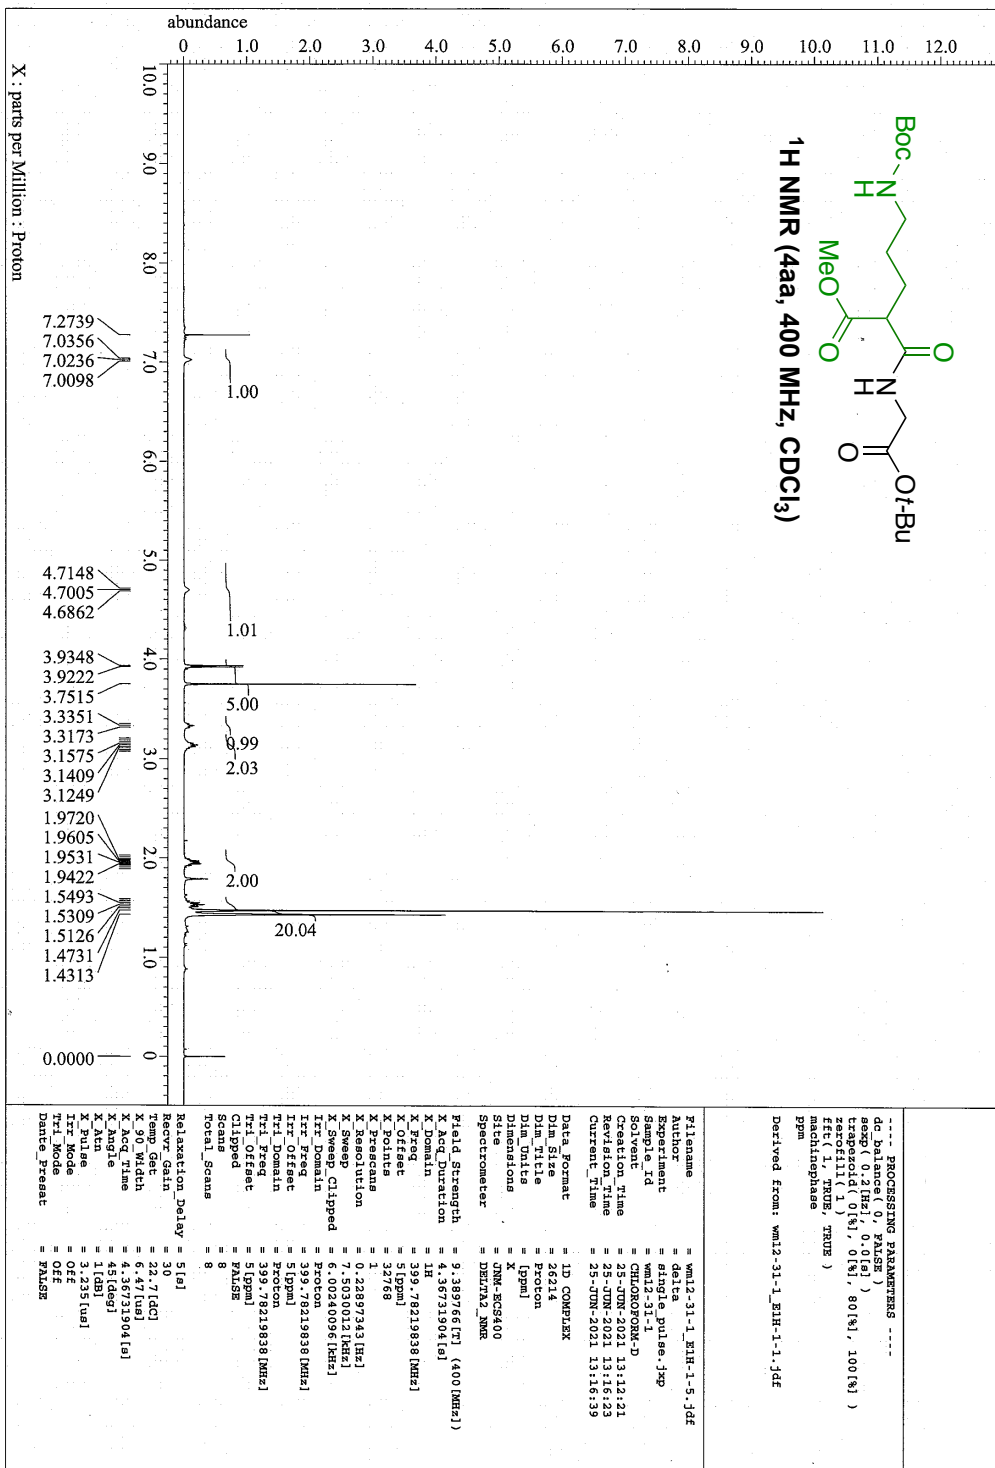

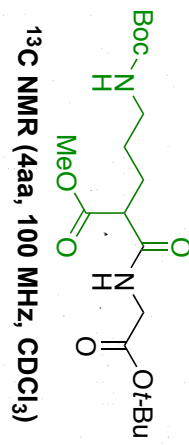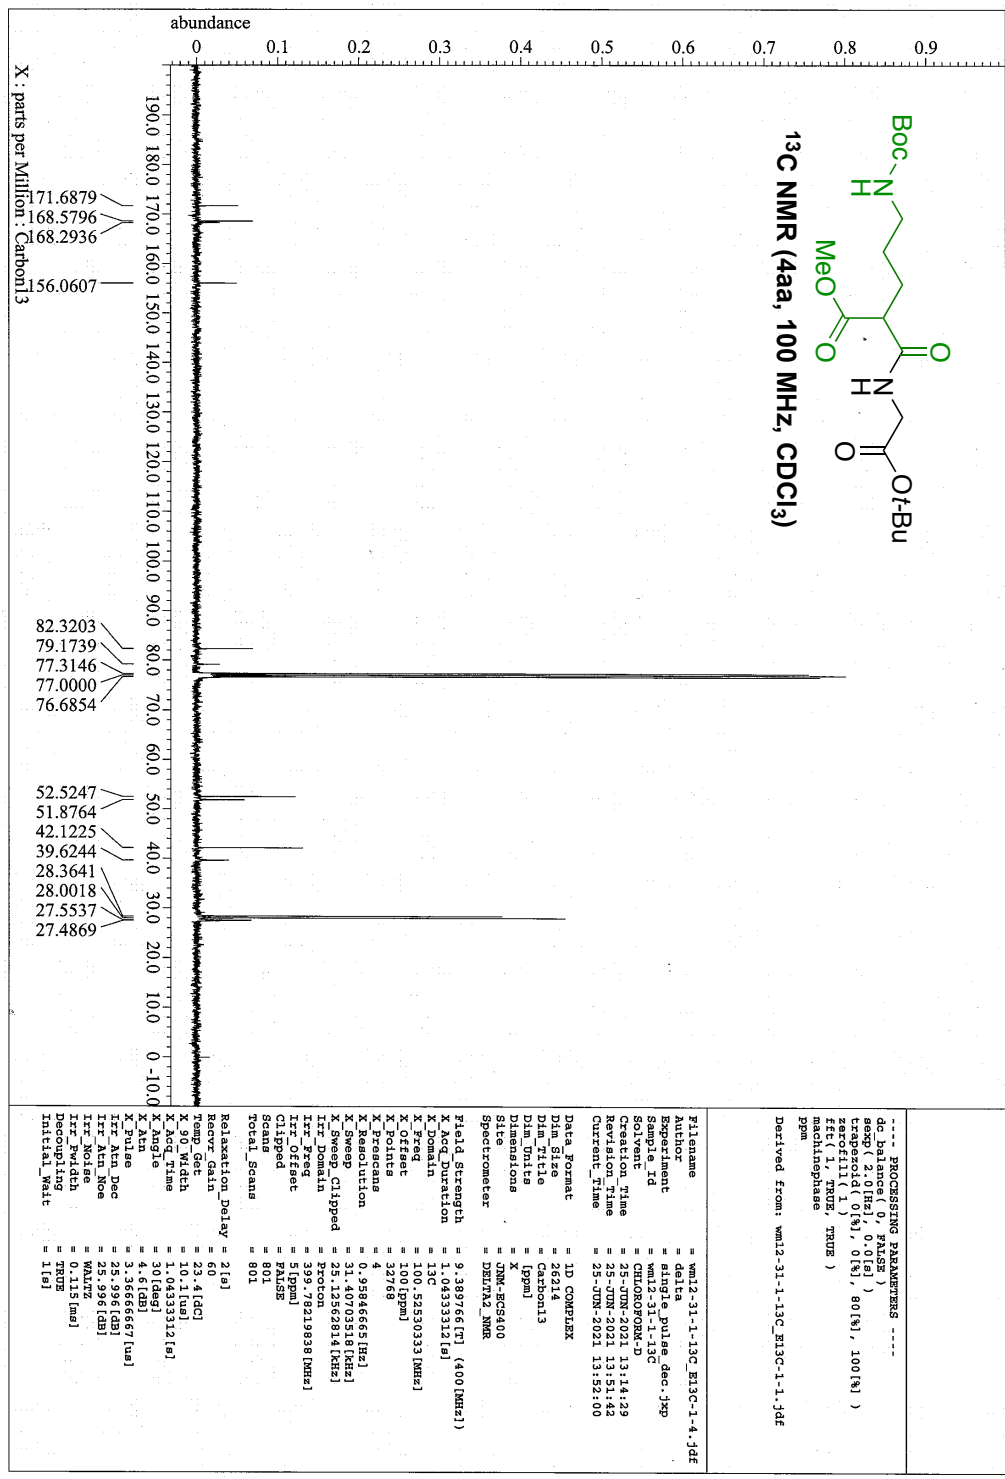

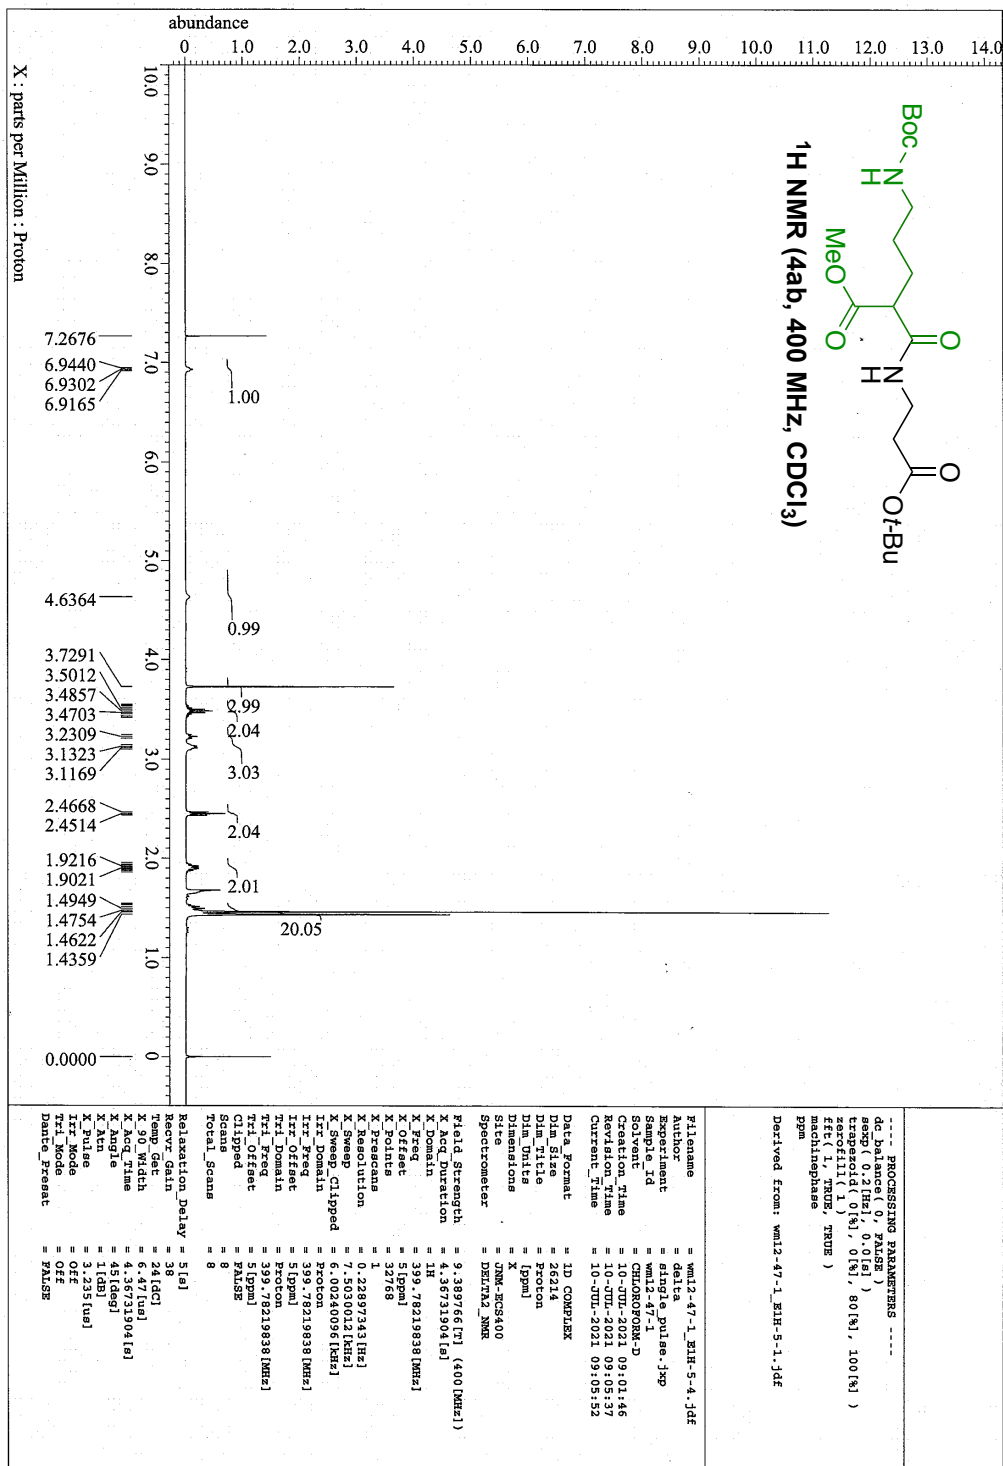

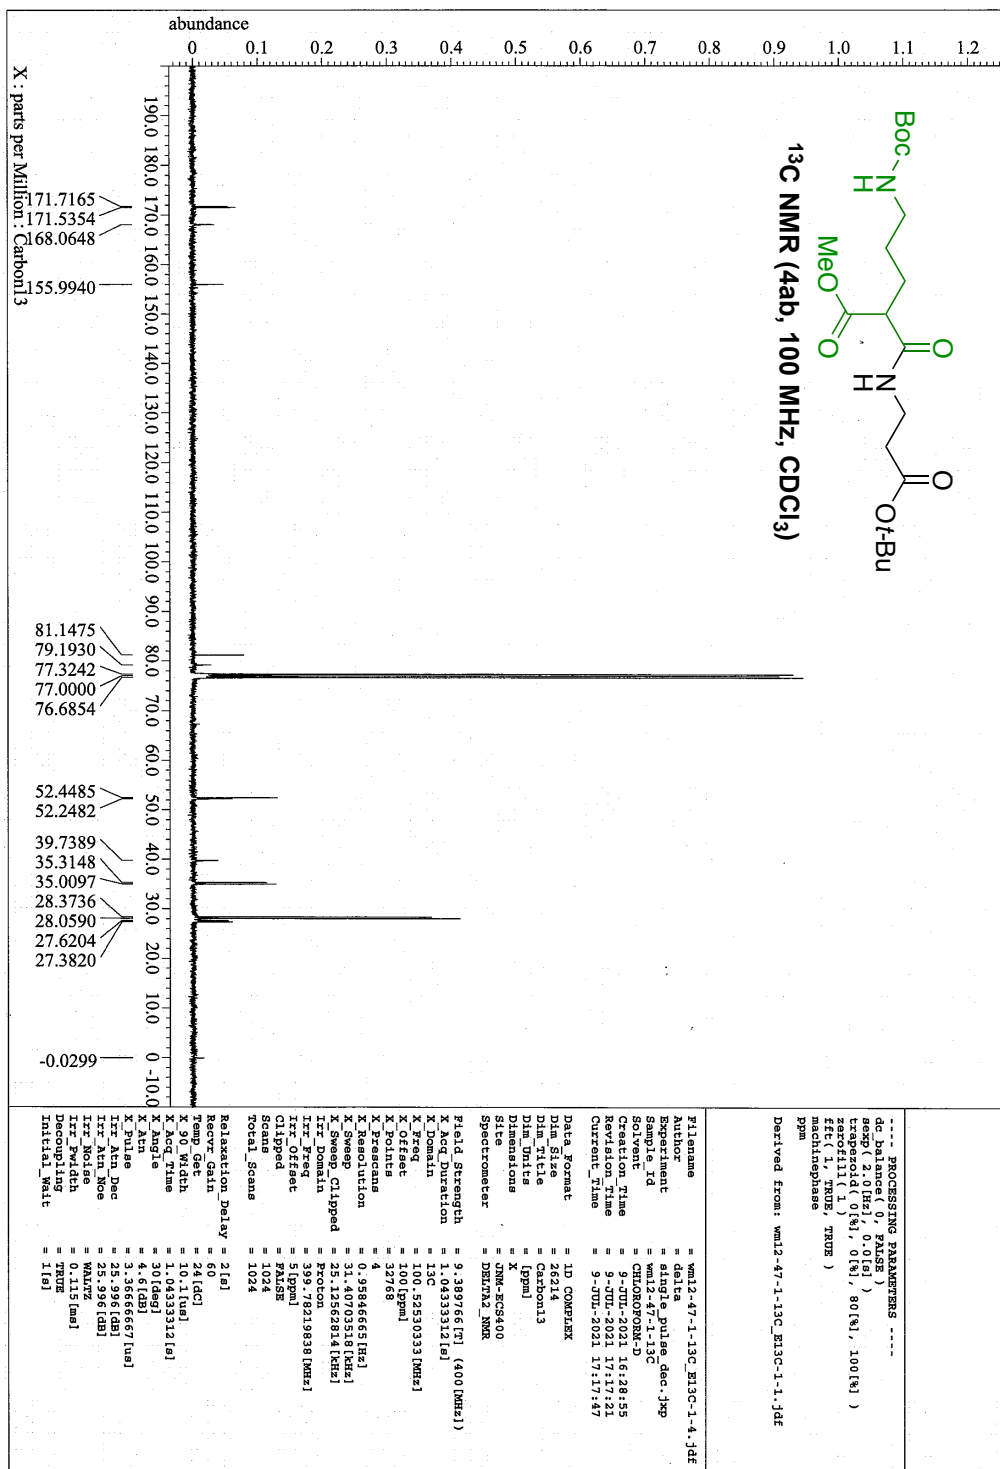

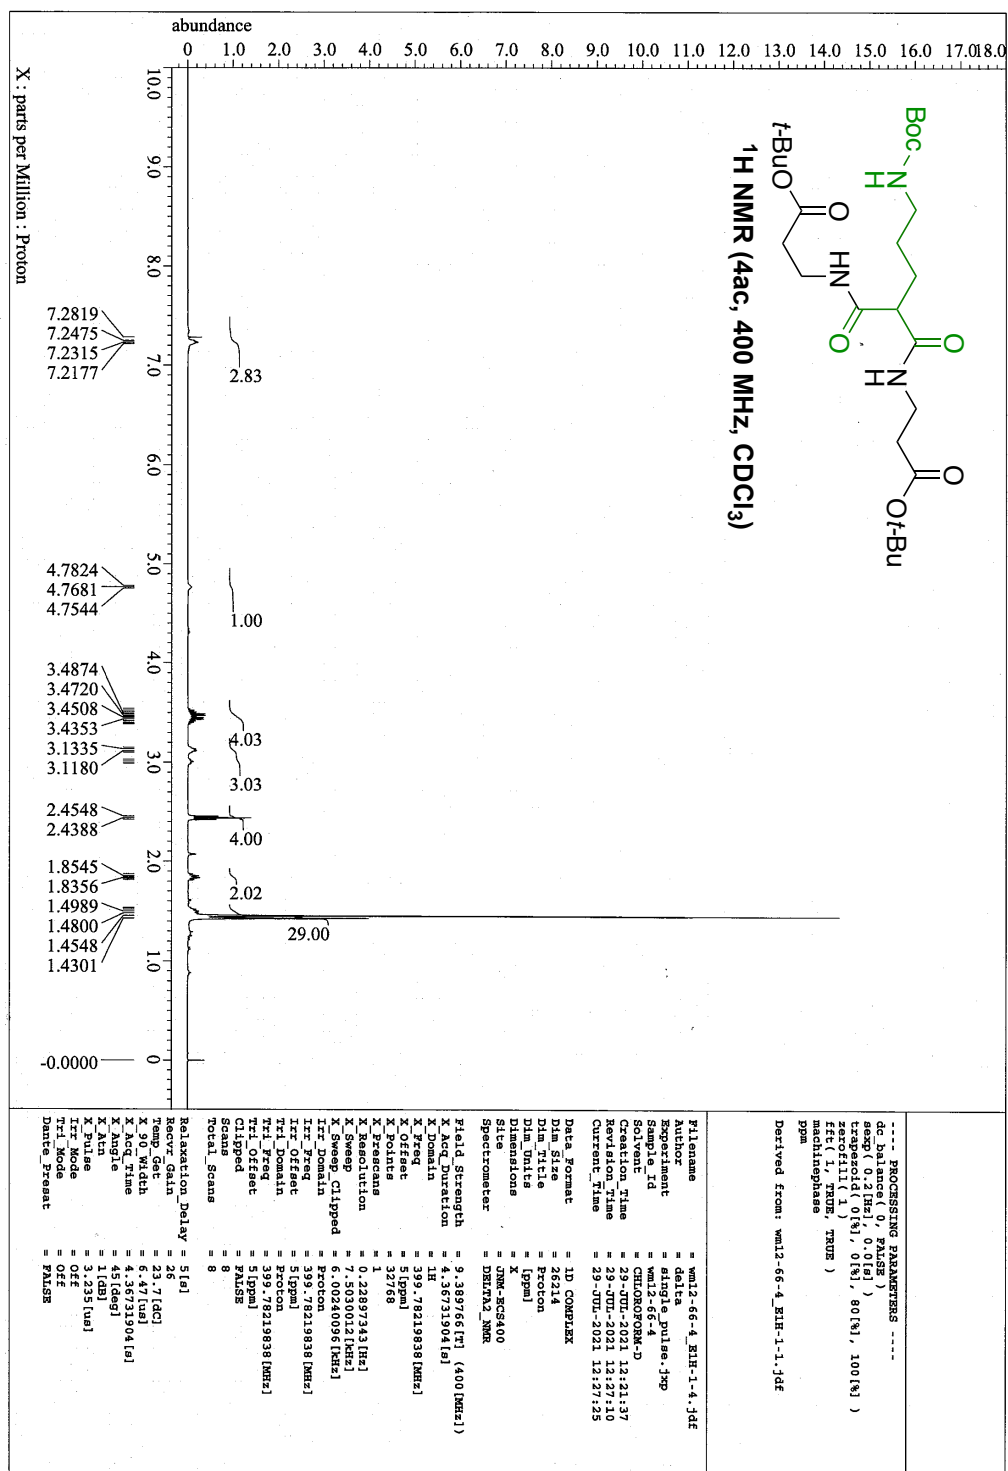



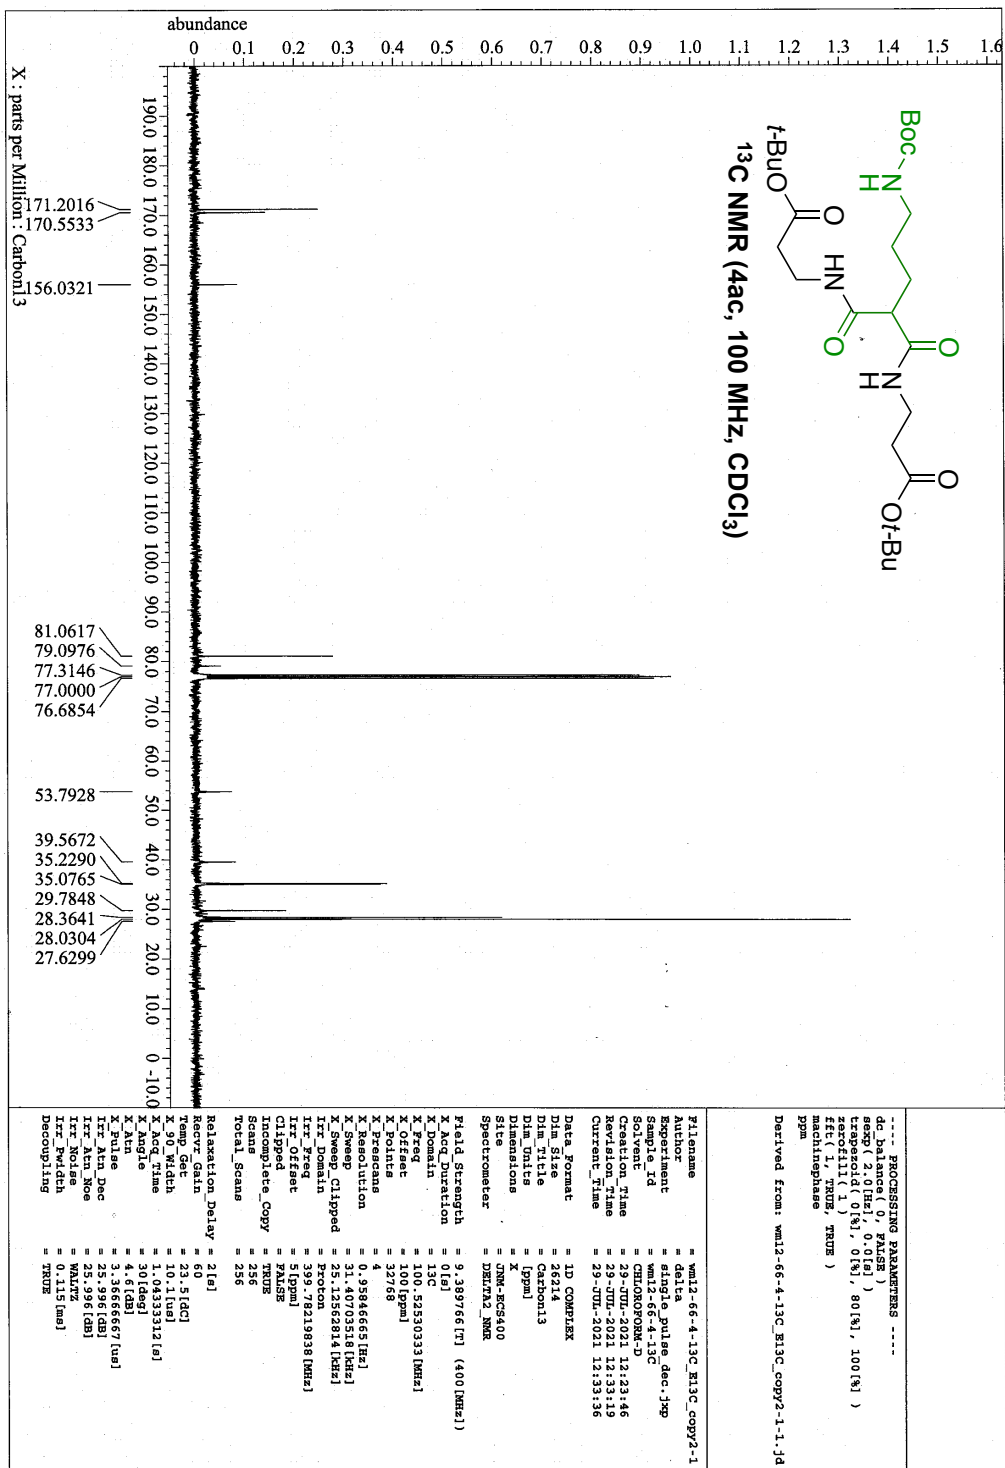



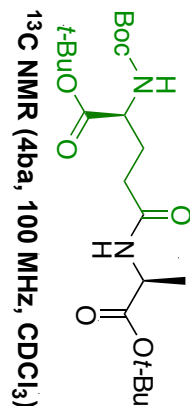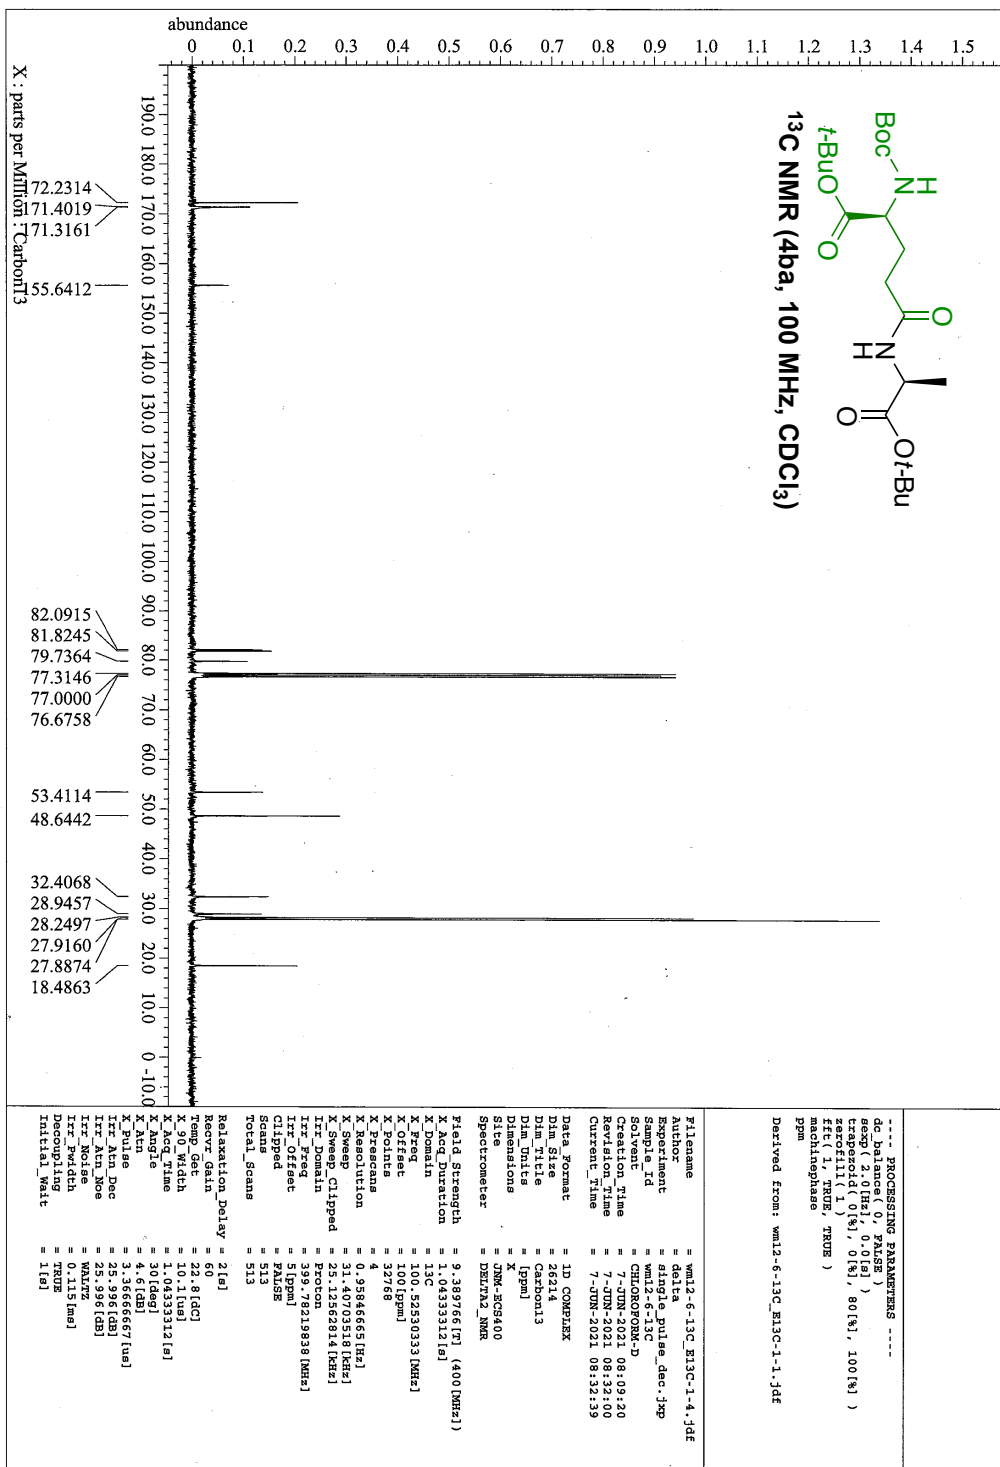

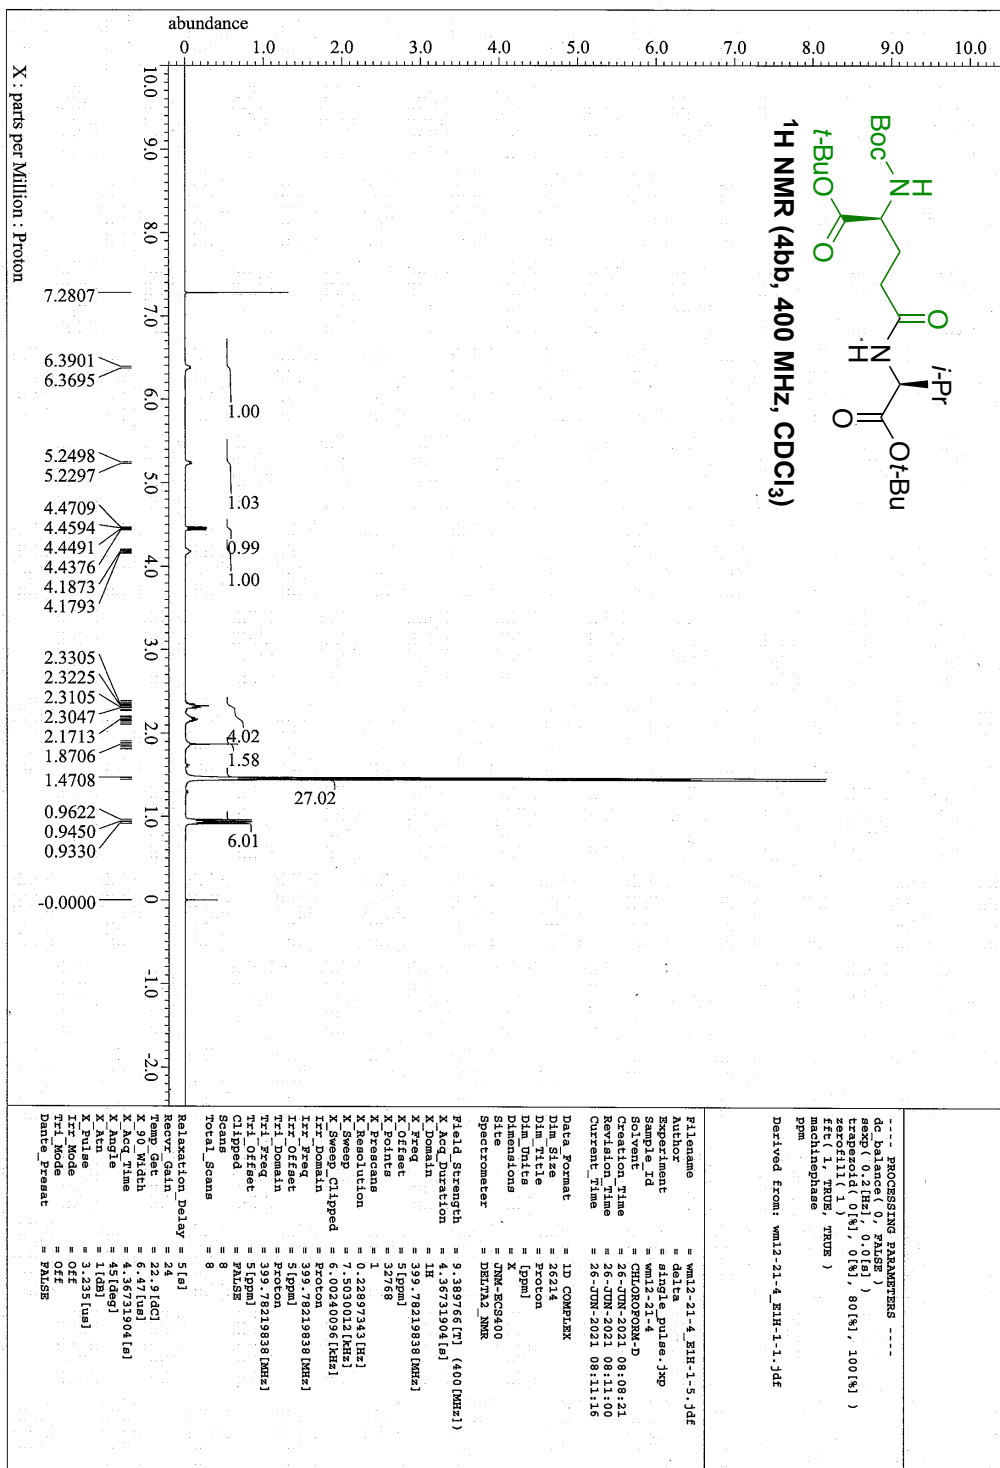





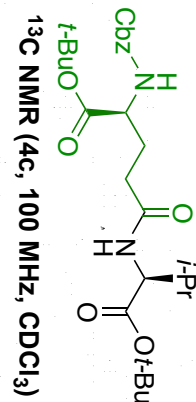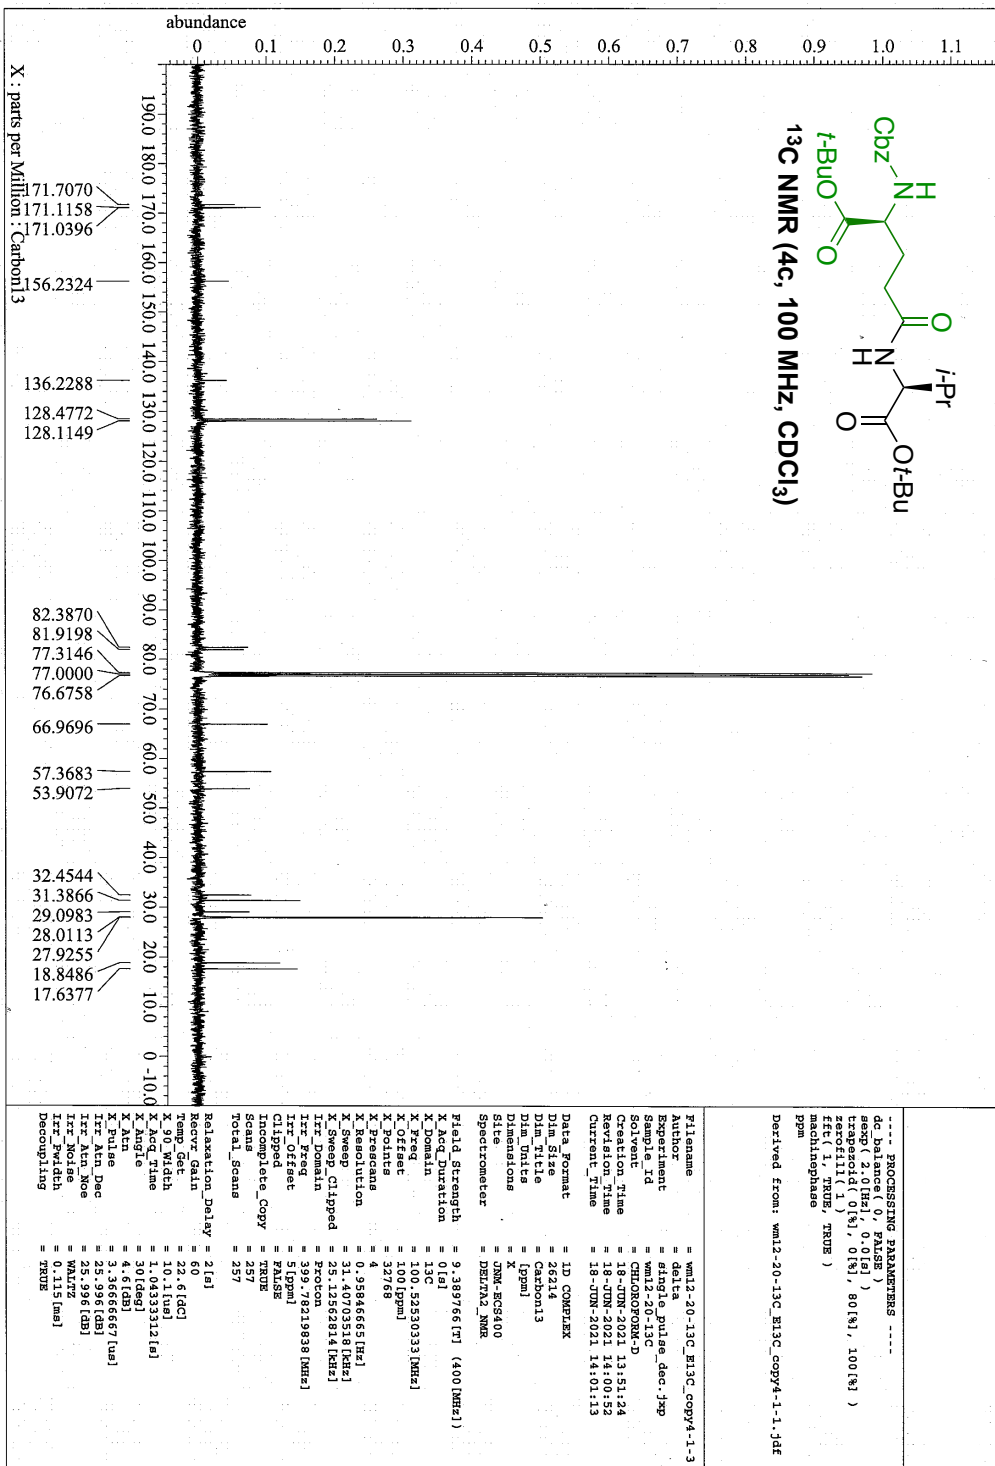









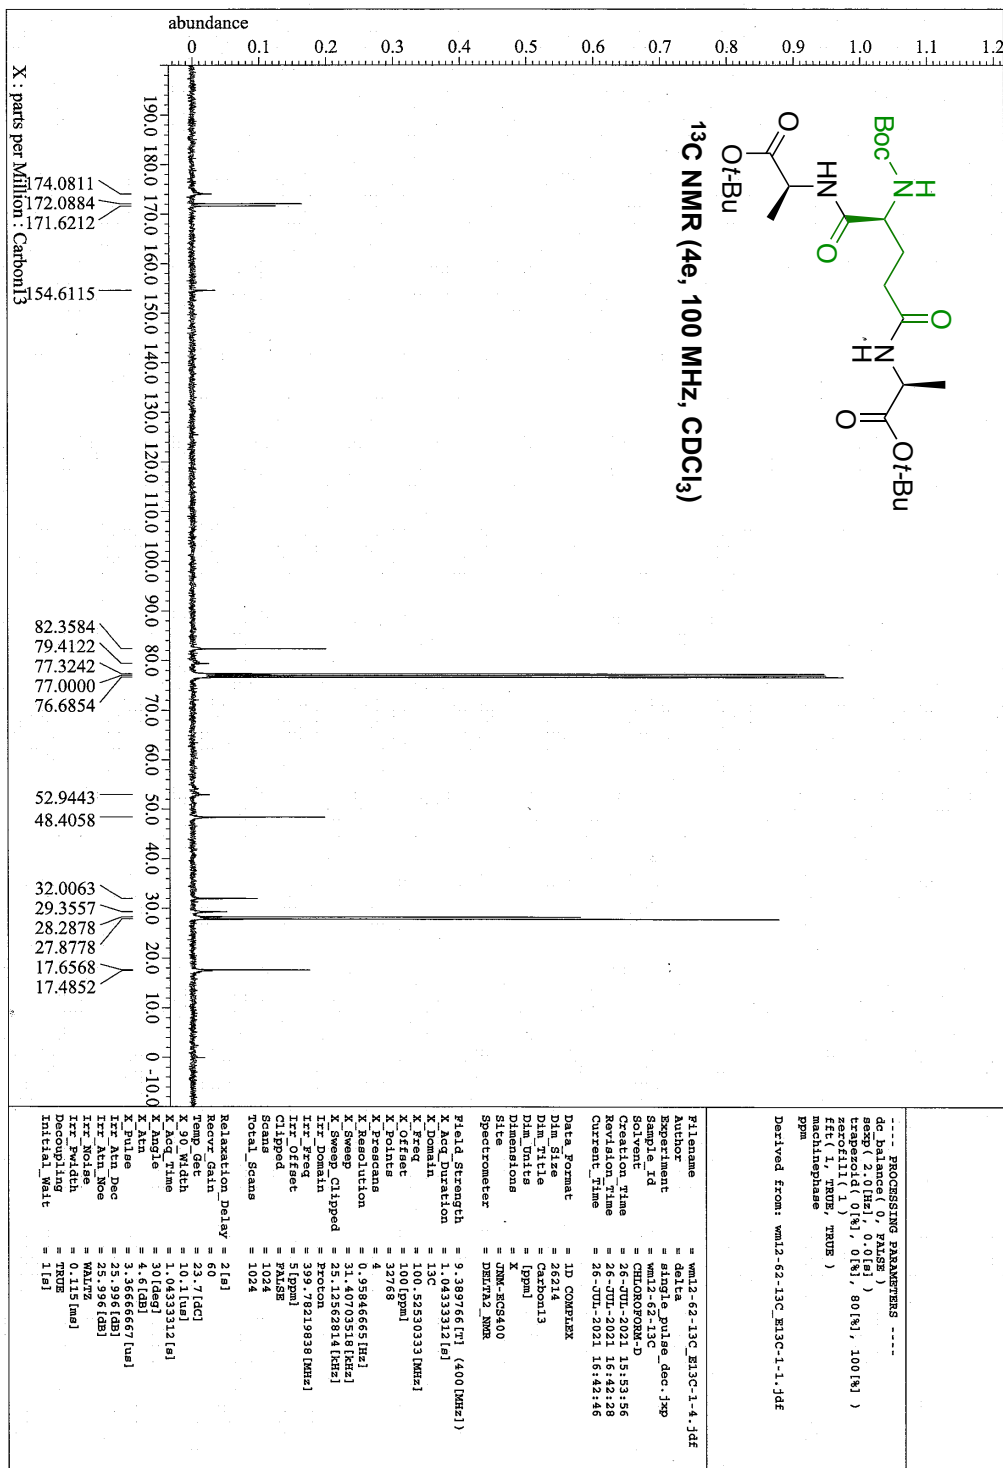



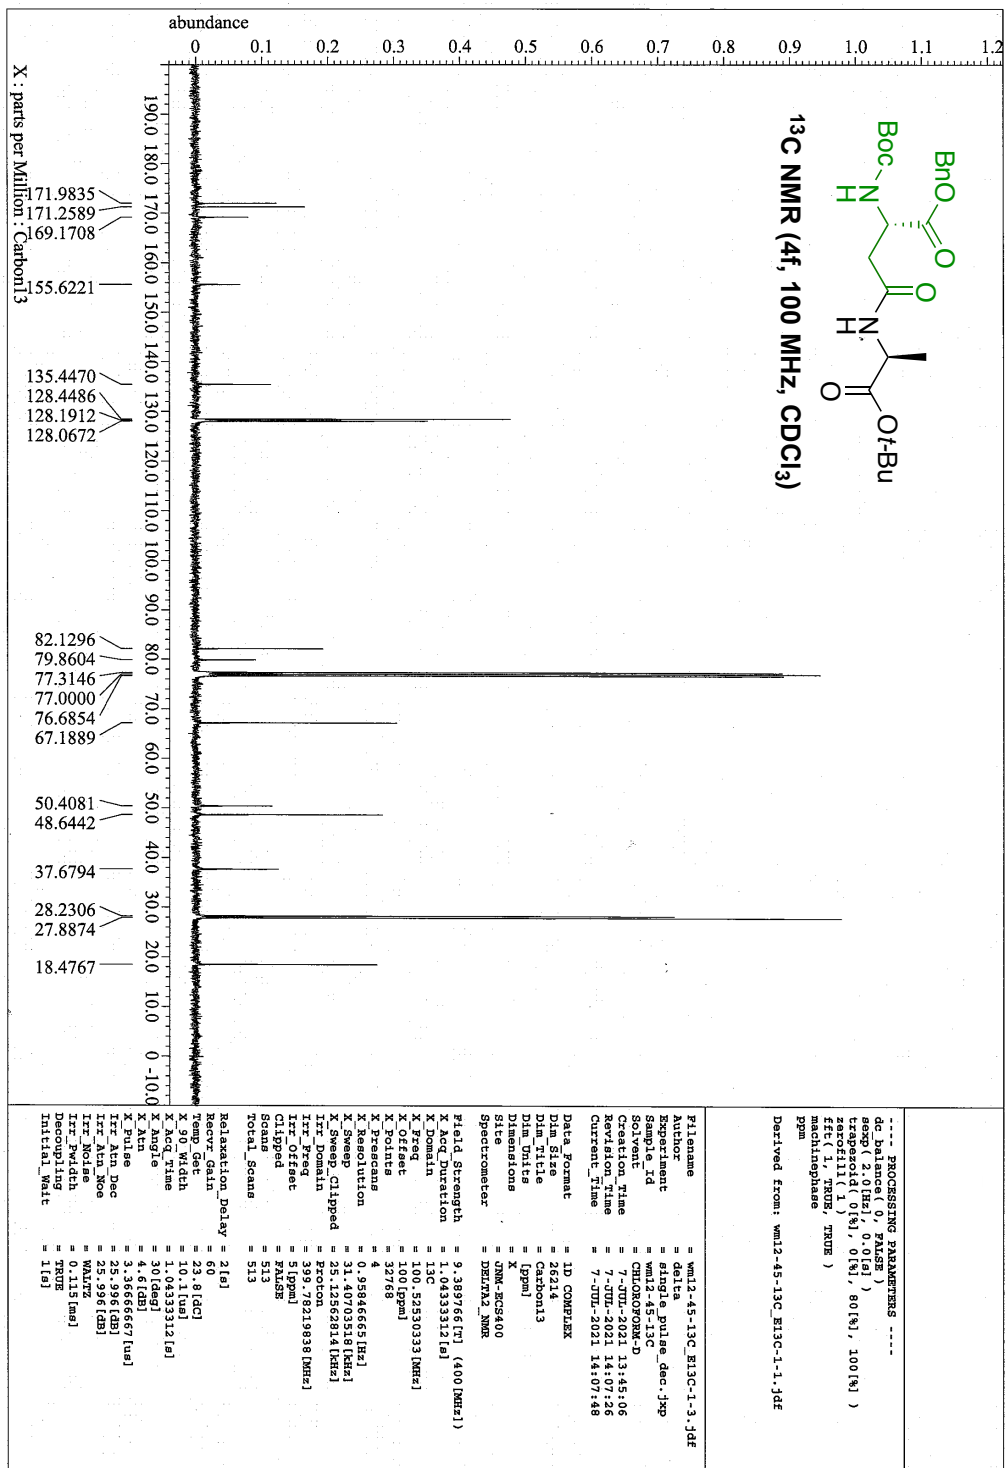



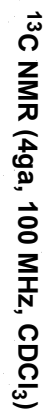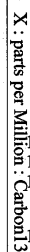

Derived from: wm12-154-2-13C\_B13C-1-1.jdd

Initial<sub>max</sub>Wait = 1[s]

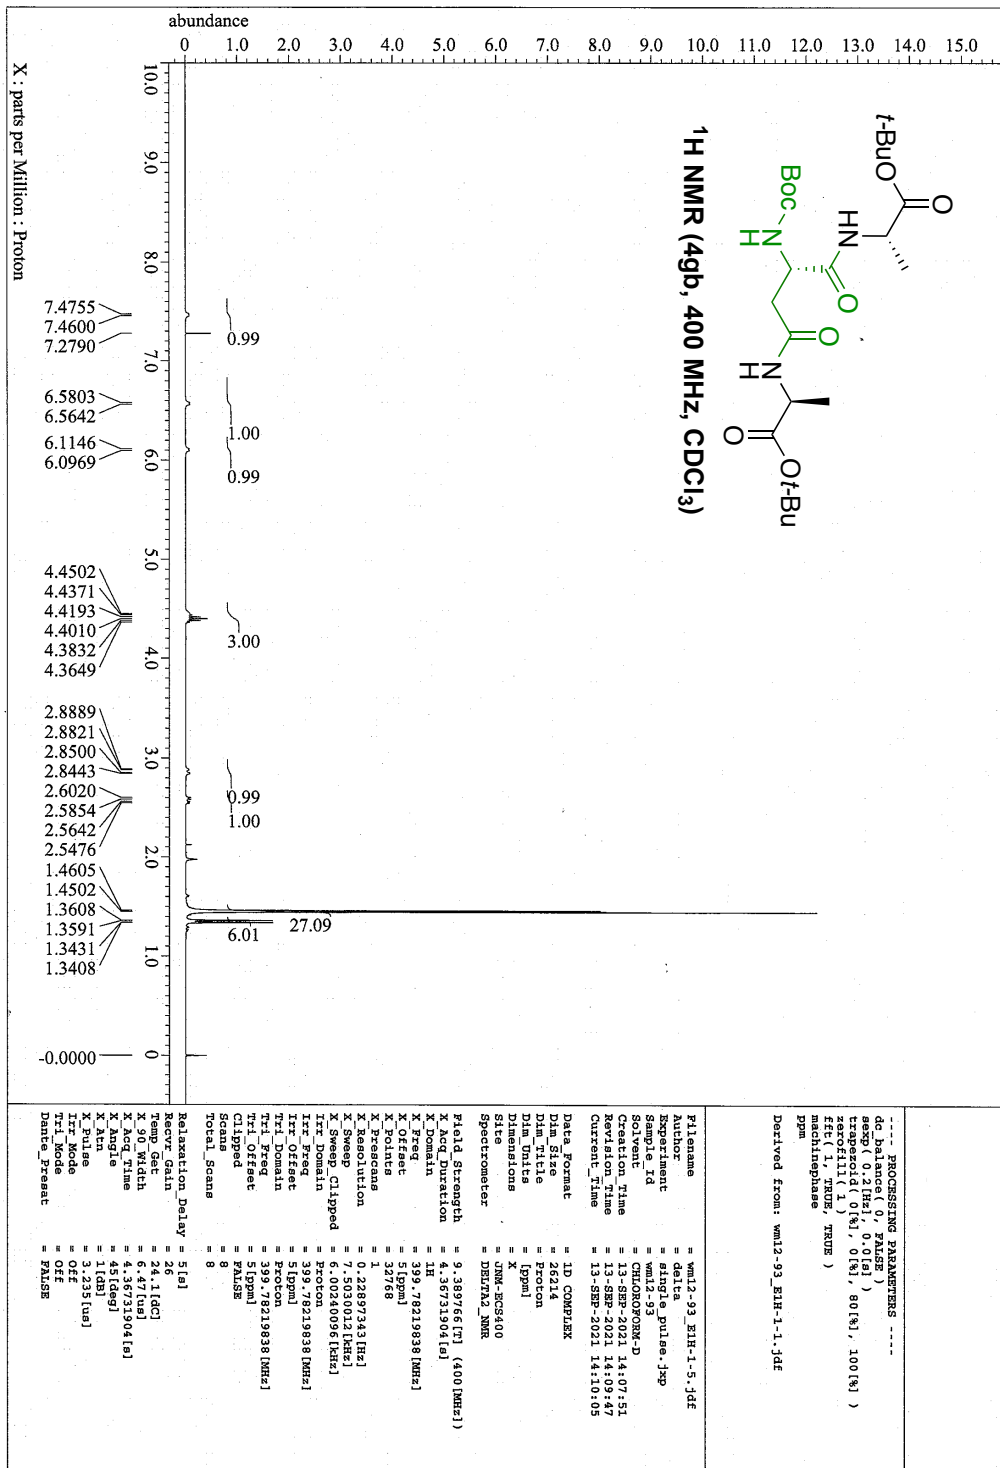



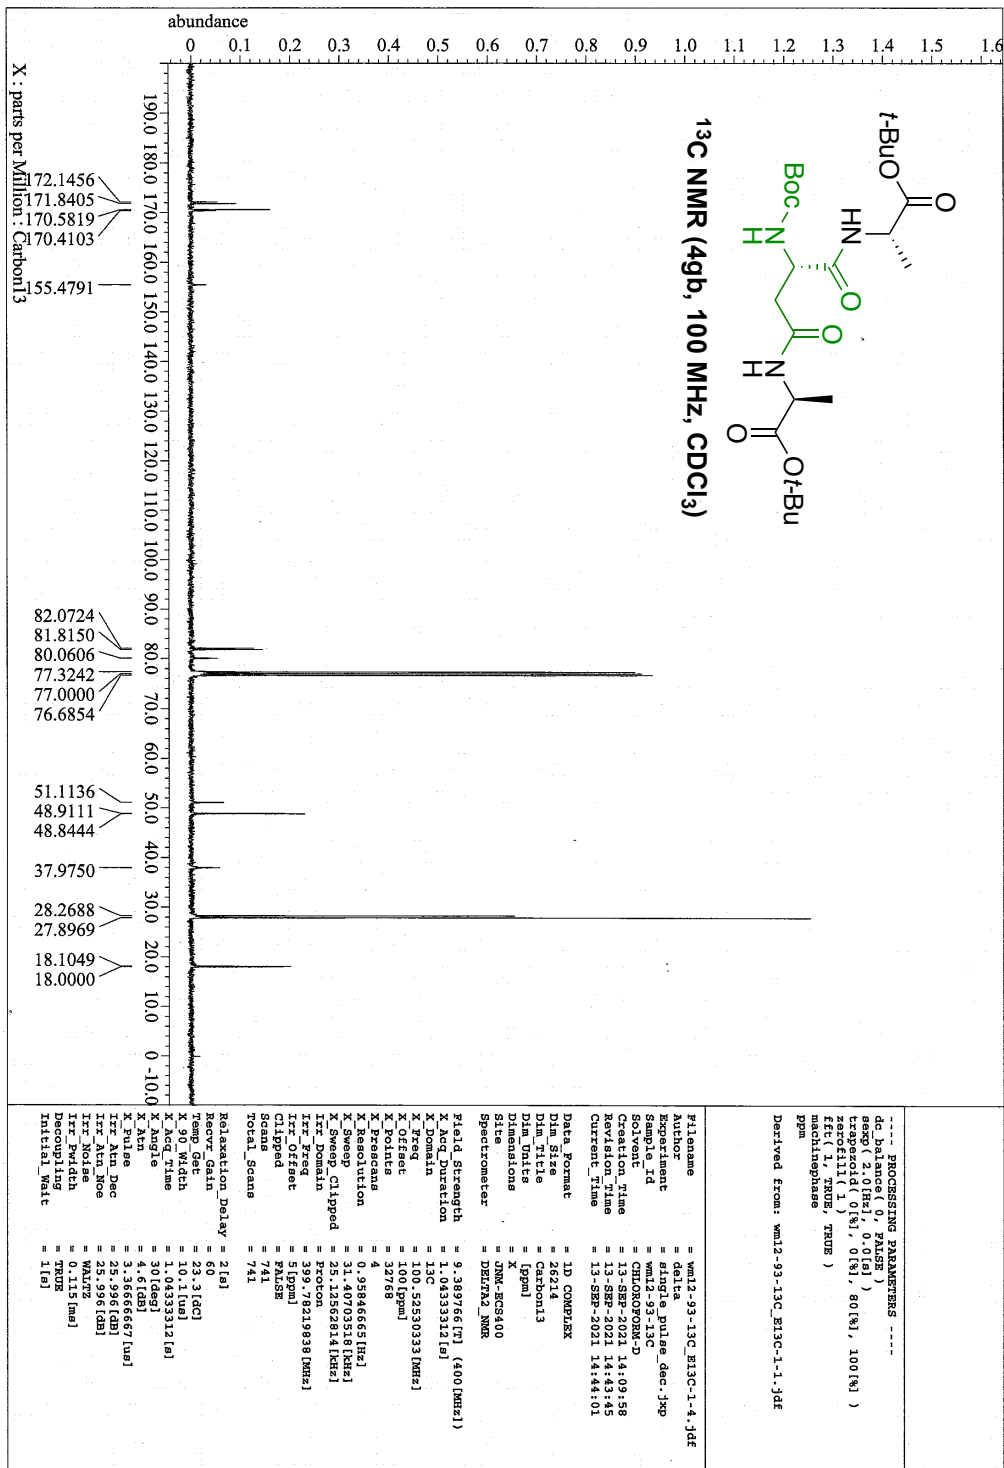





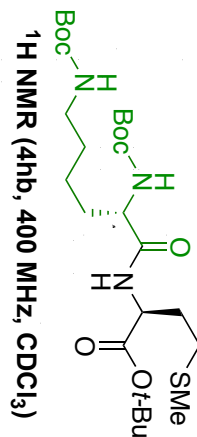

<sup>1</sup>H NMR (4hb, 400 MHz, CDCl<sub>3</sub>)

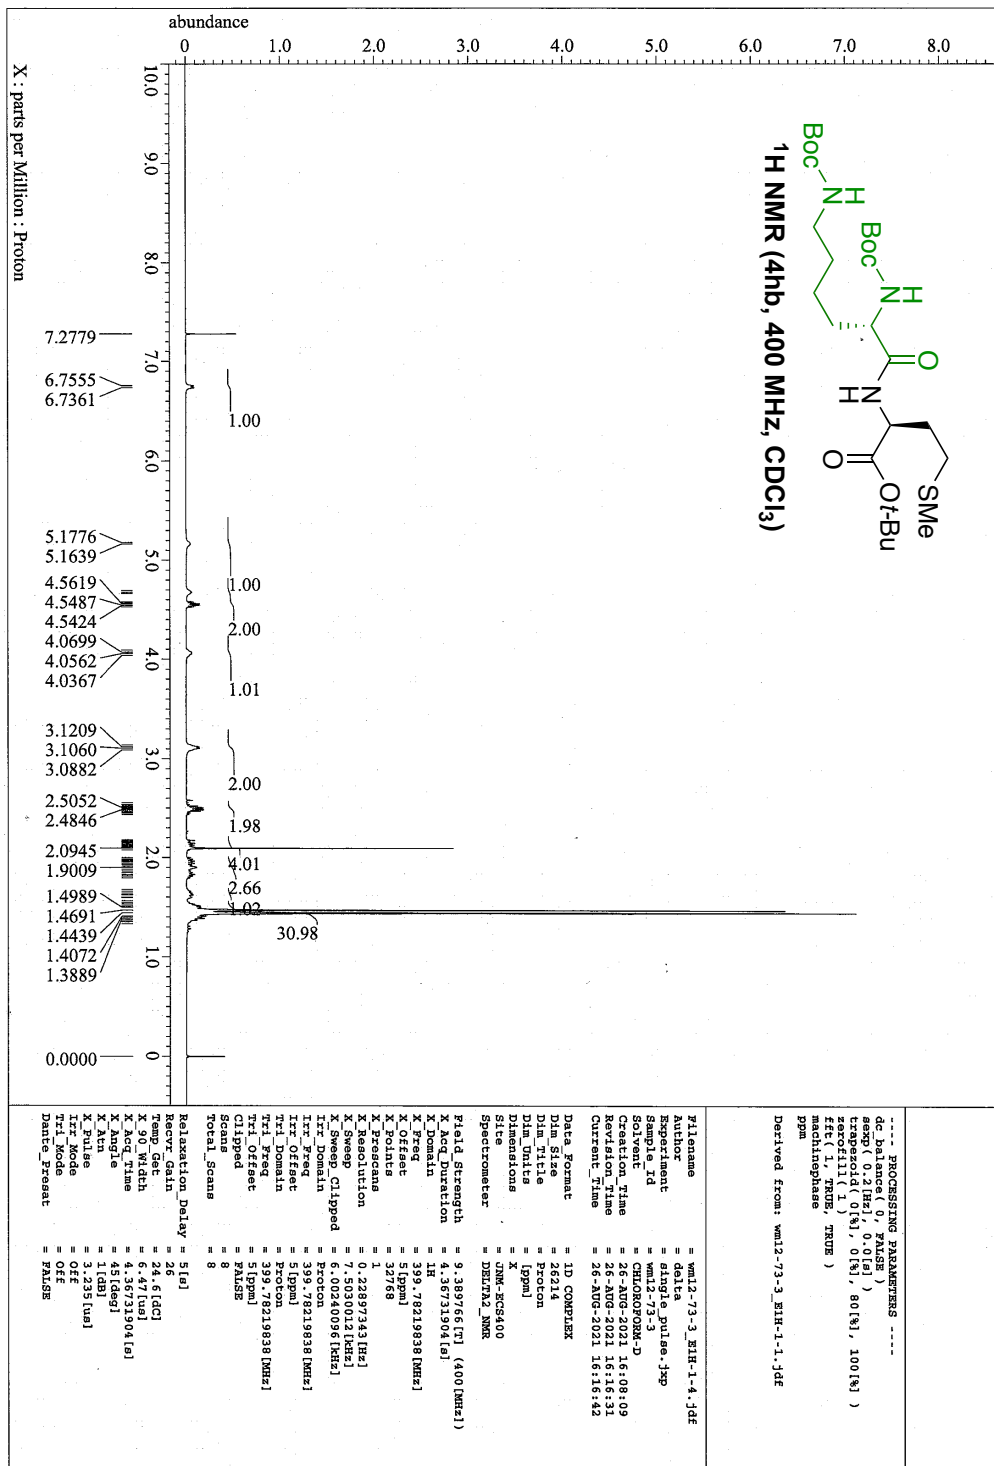





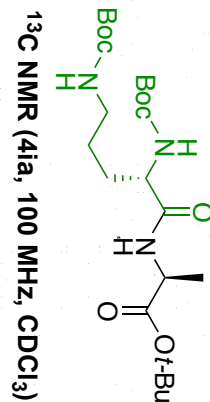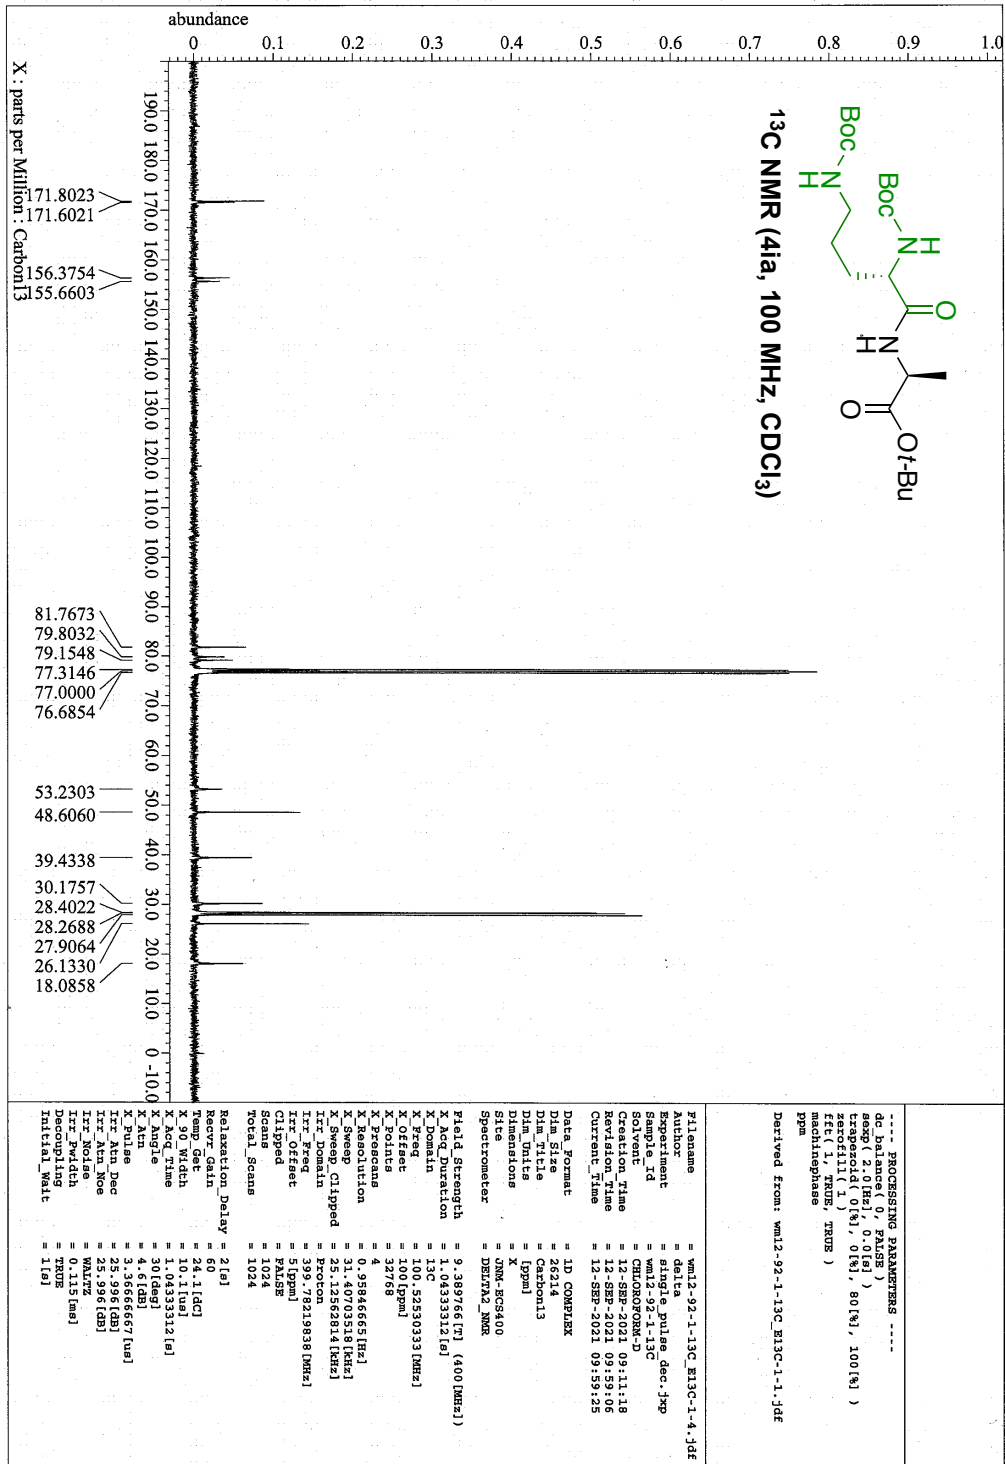

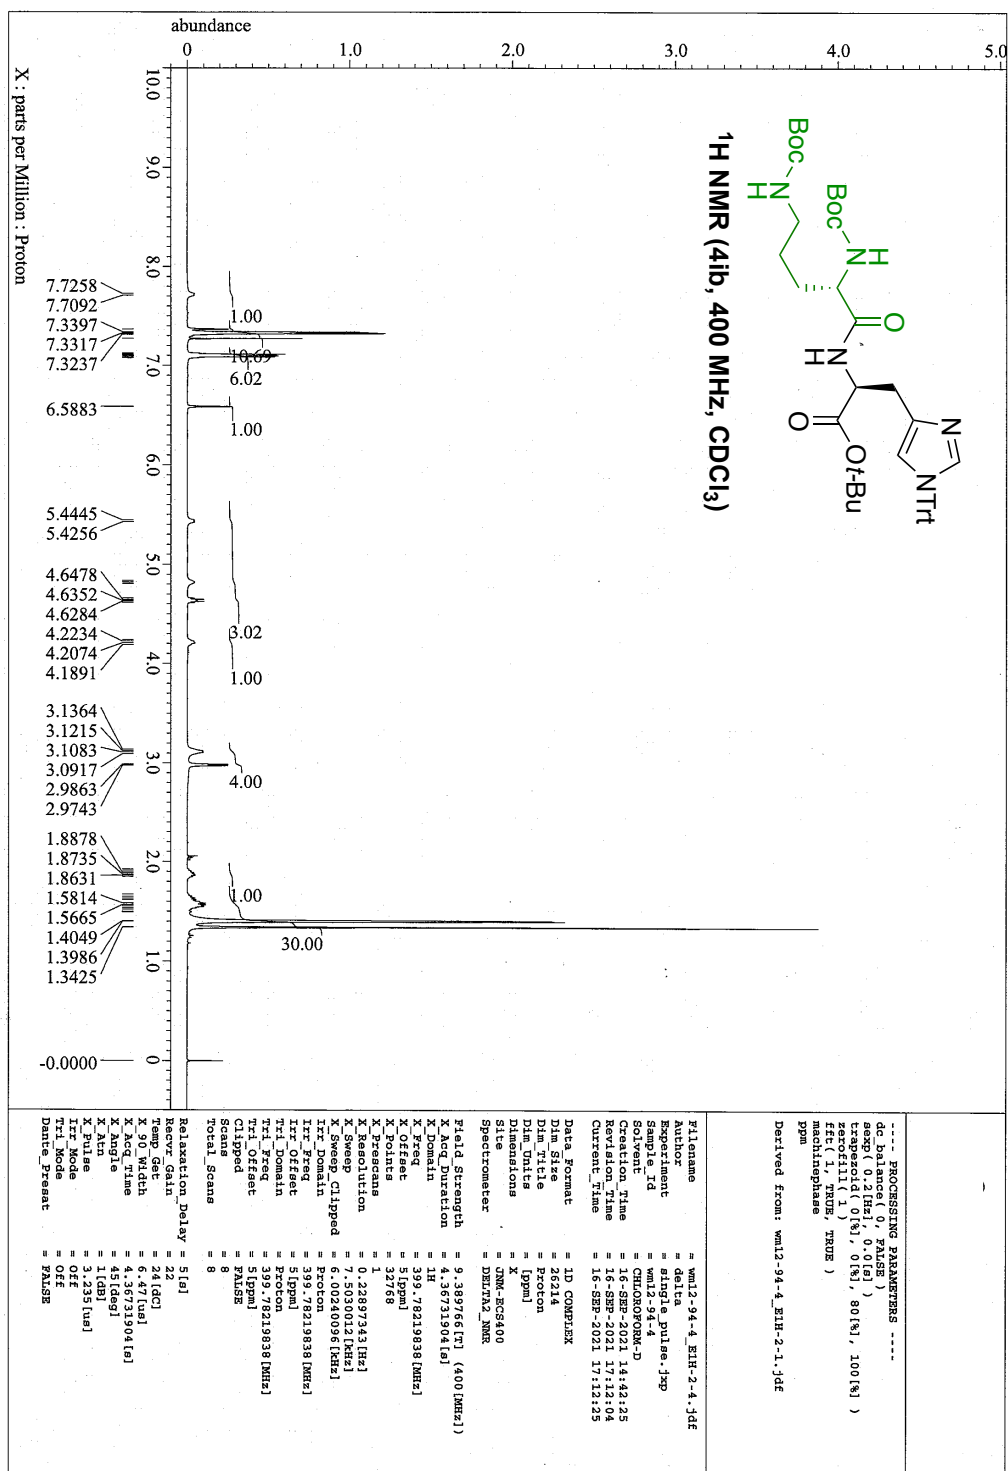



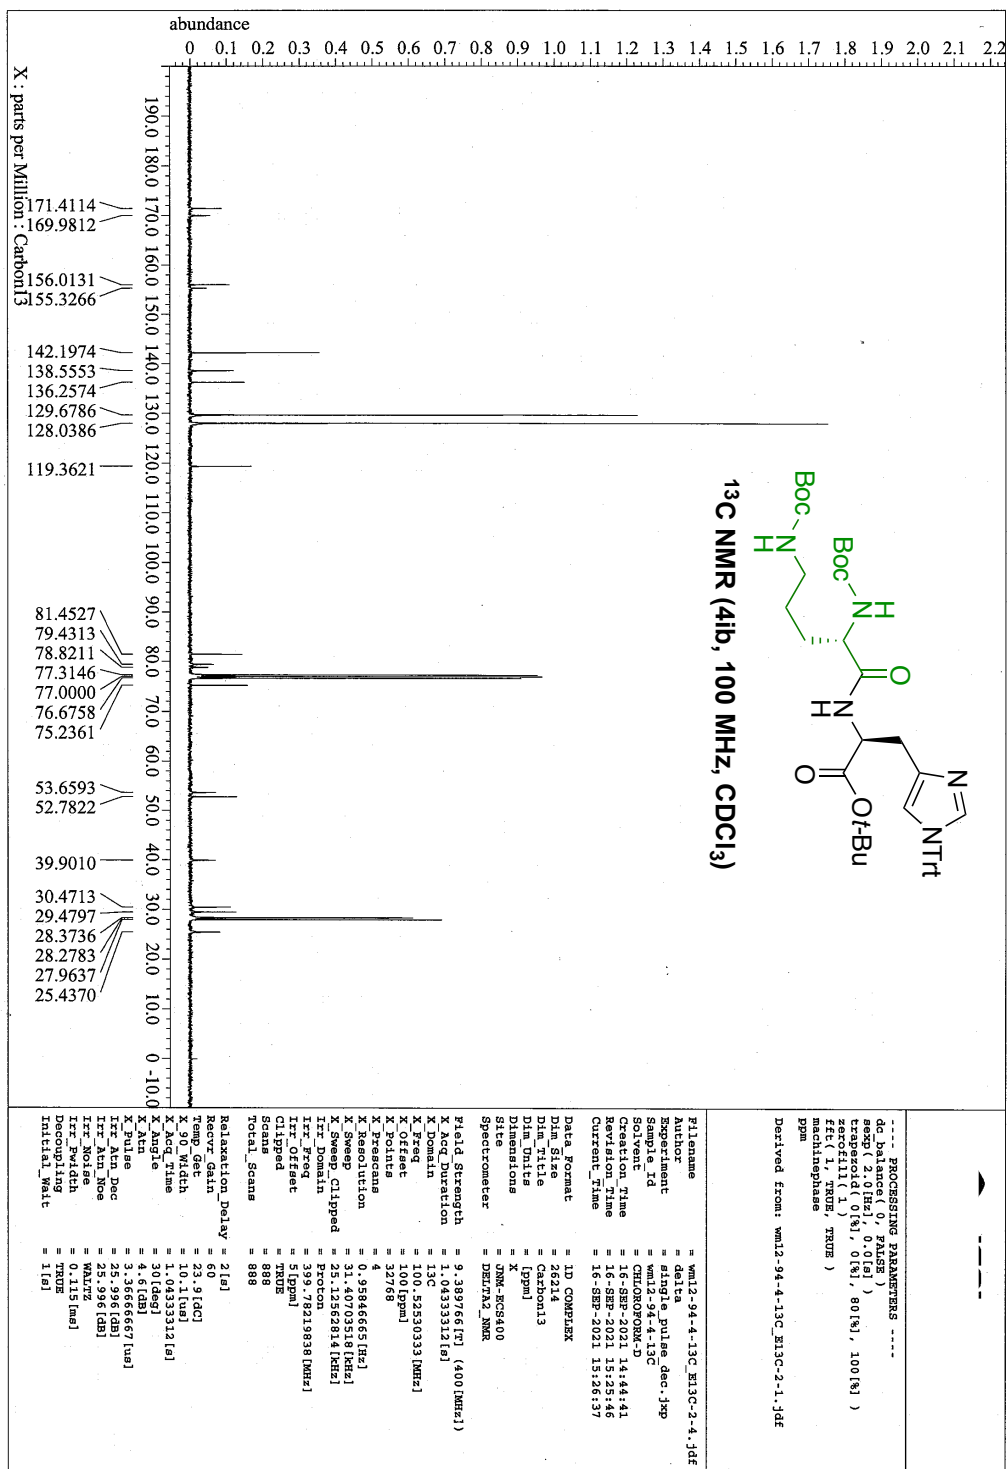

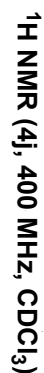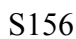





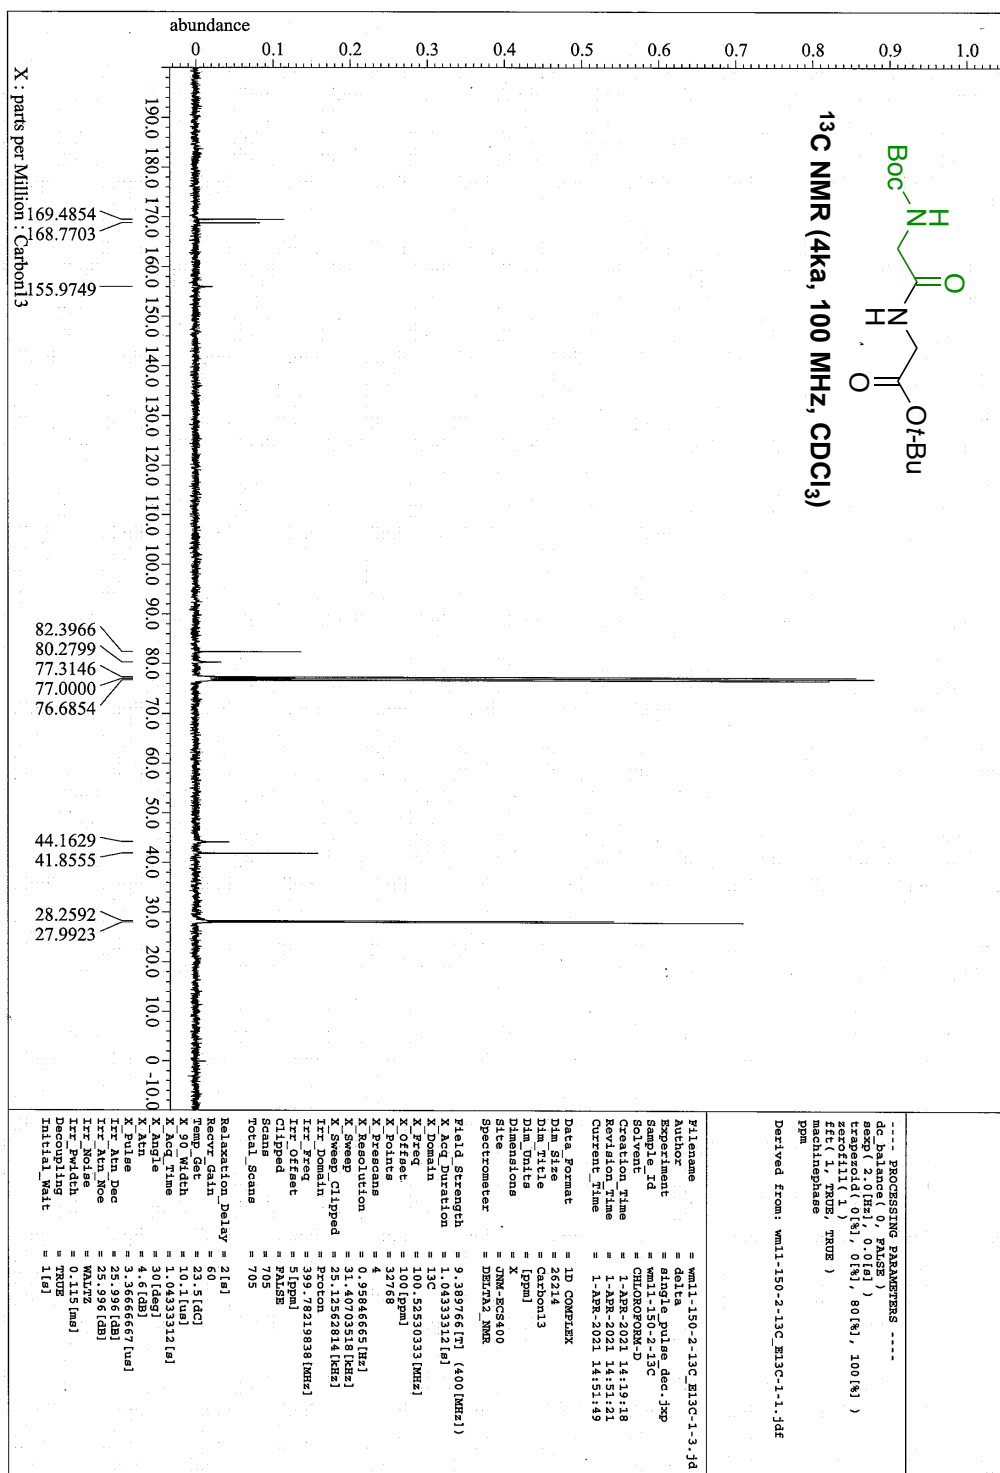

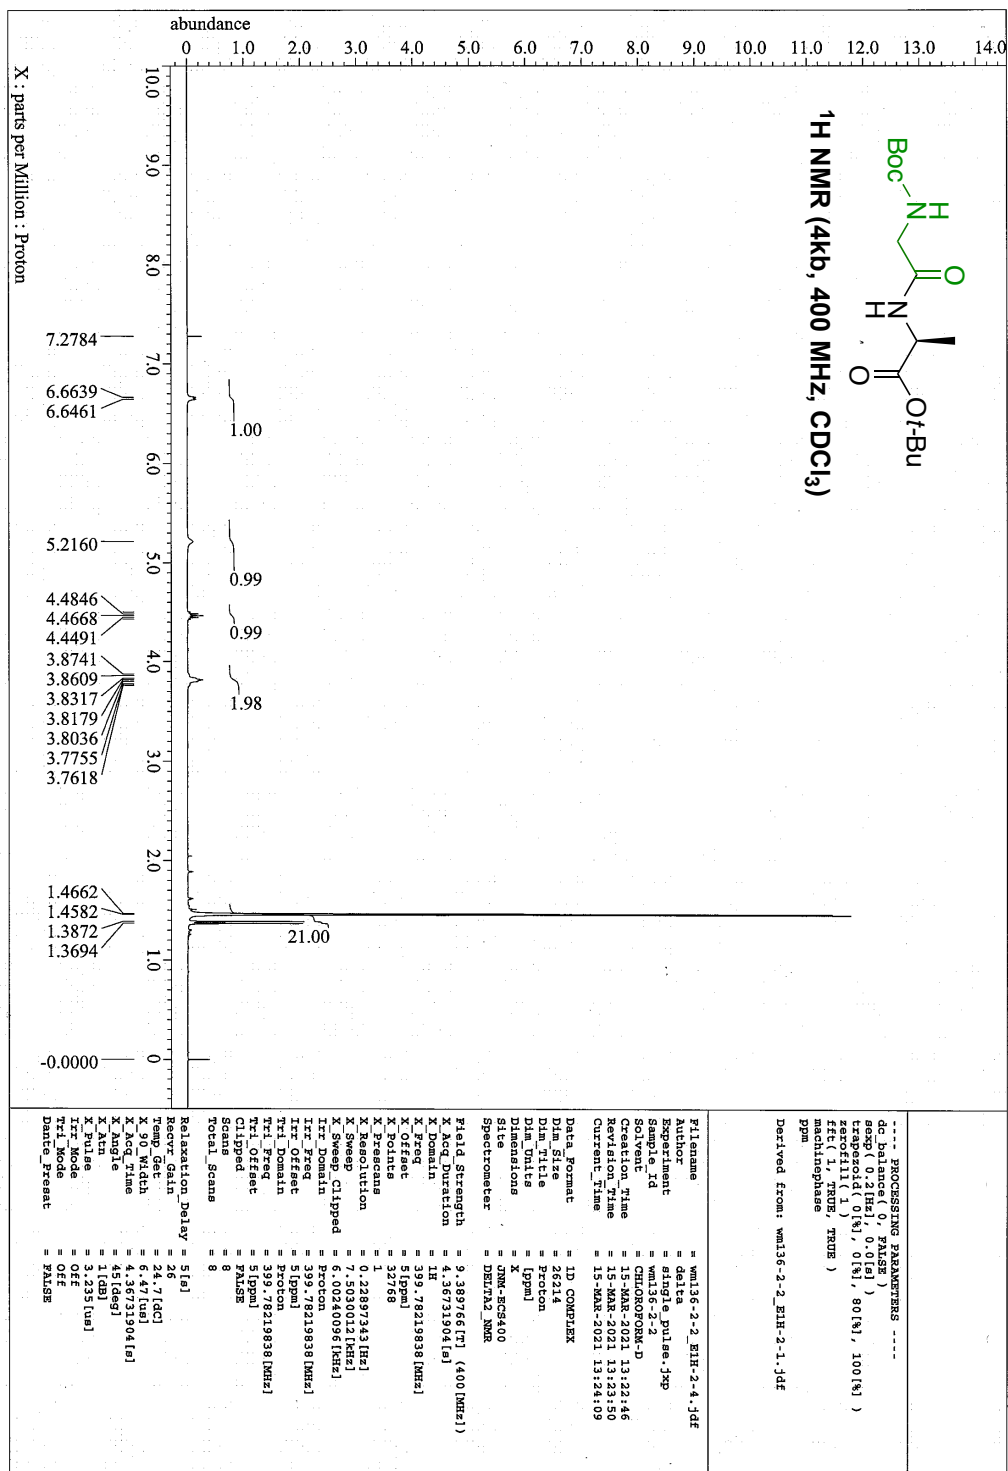

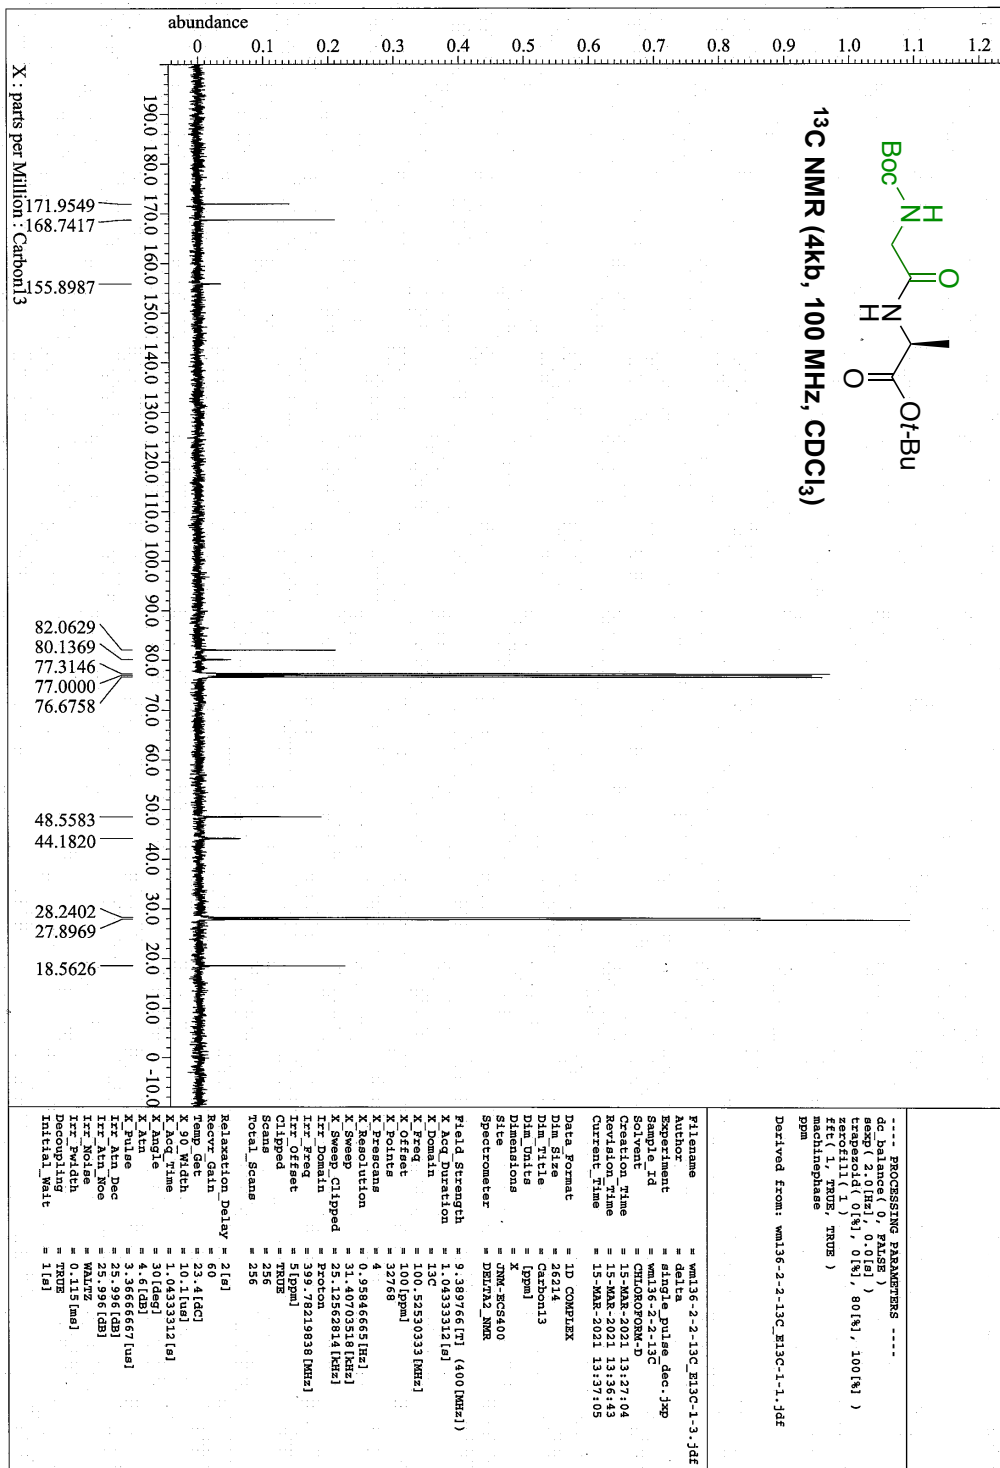





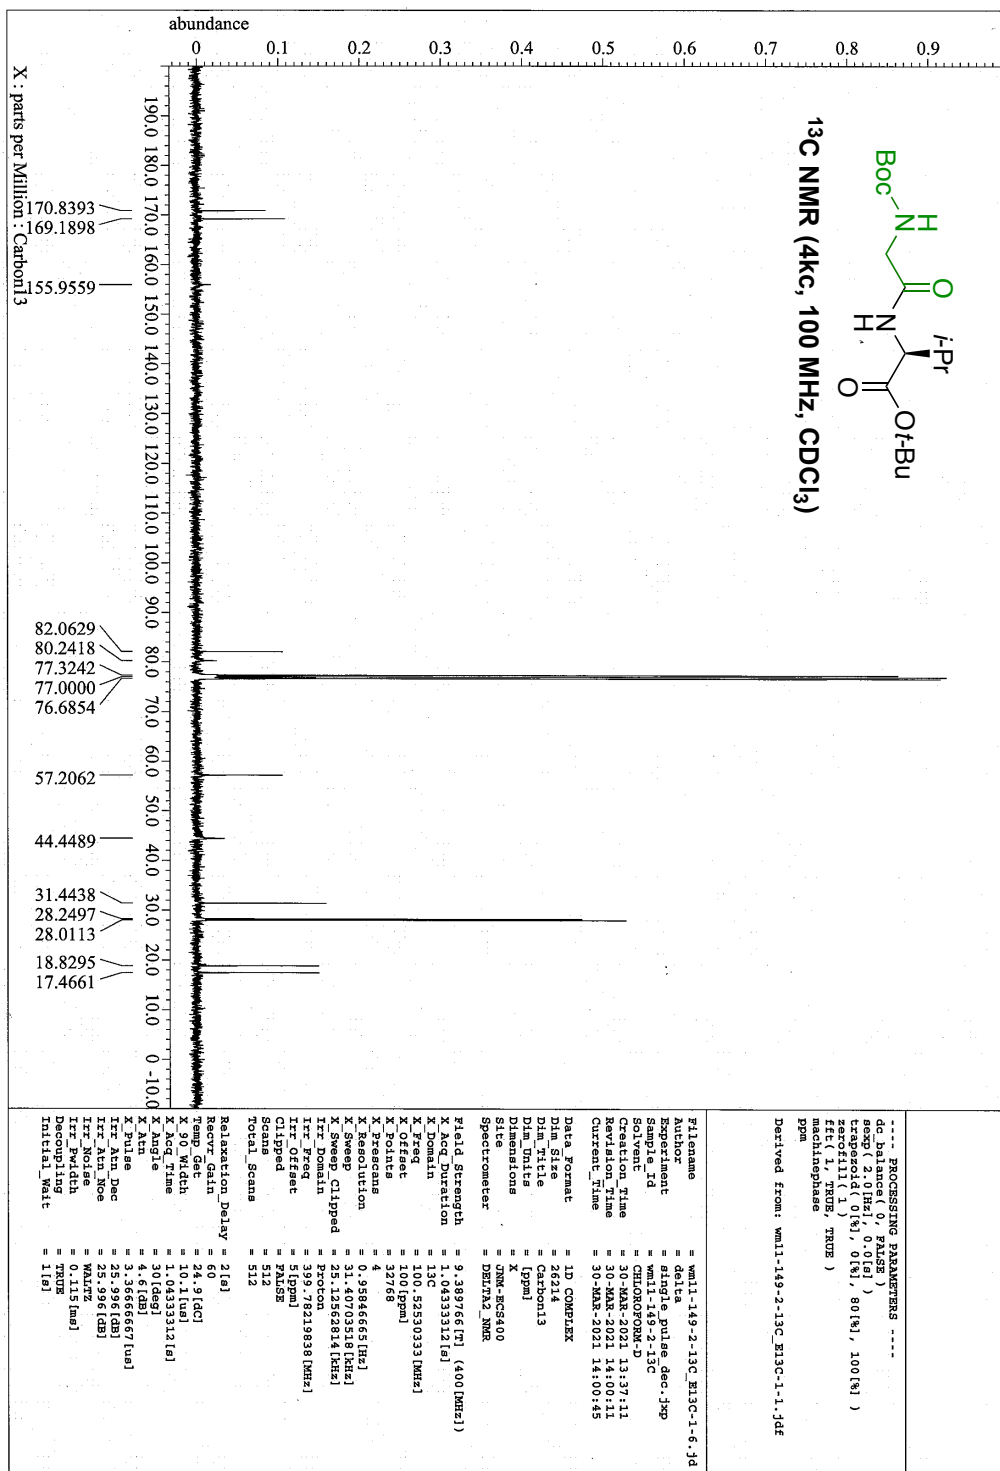

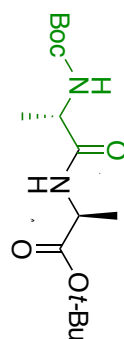

<sup>1</sup>H NMR (4l, 400 MHz, CDCl<sub>3</sub>)

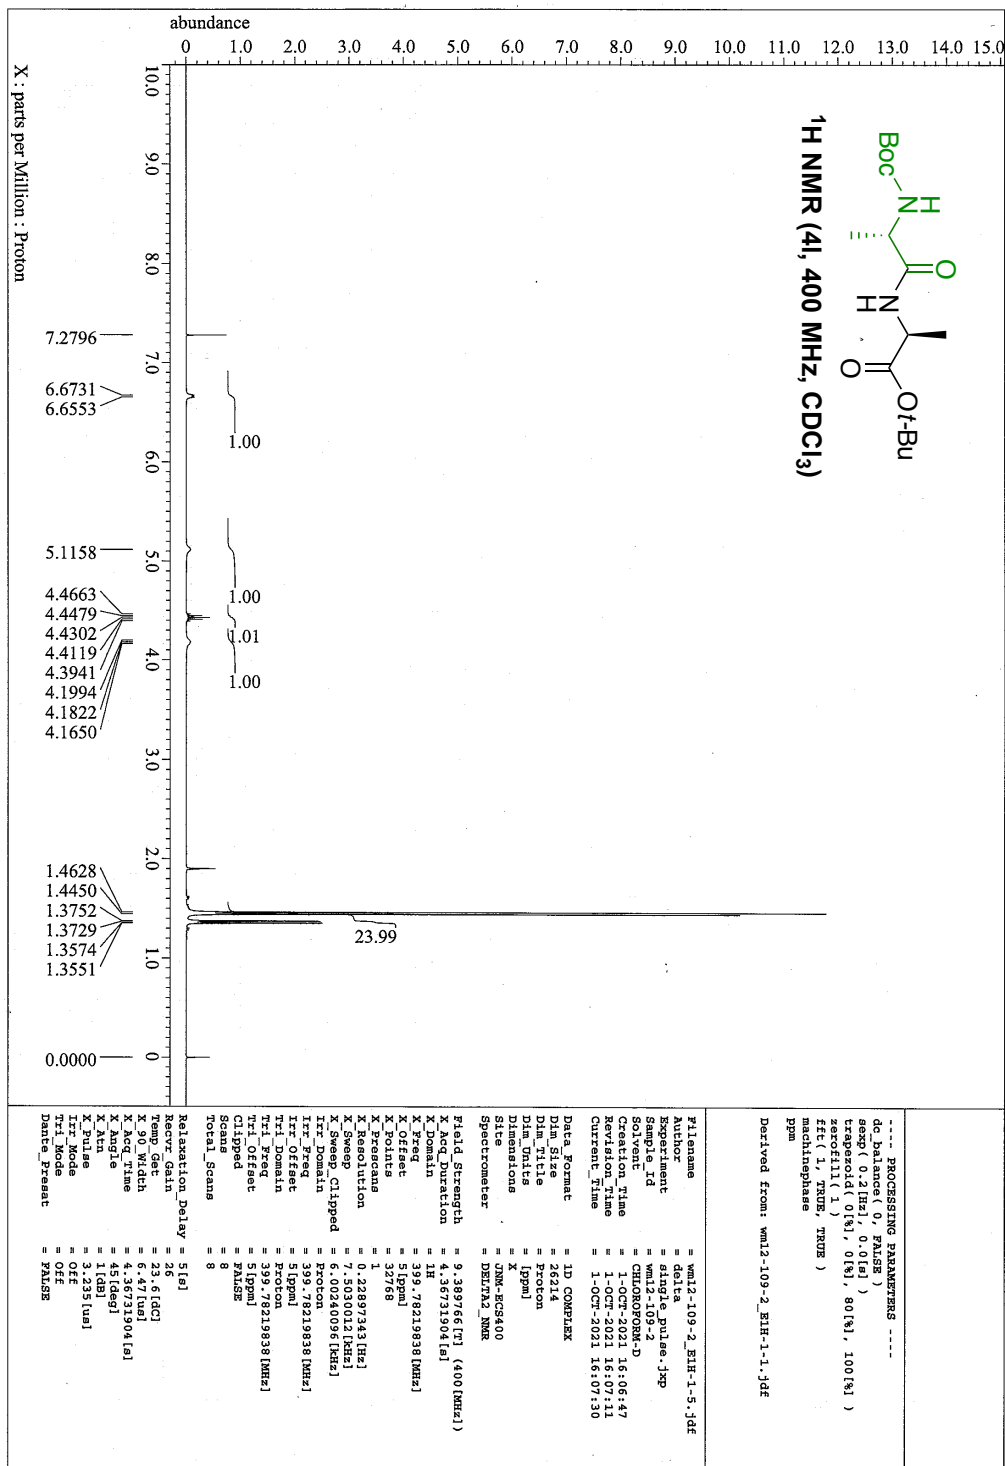

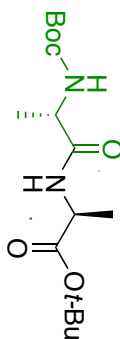

<sup>13</sup>C NMR (4l, 100 MHz, CDCl<sub>3</sub>)

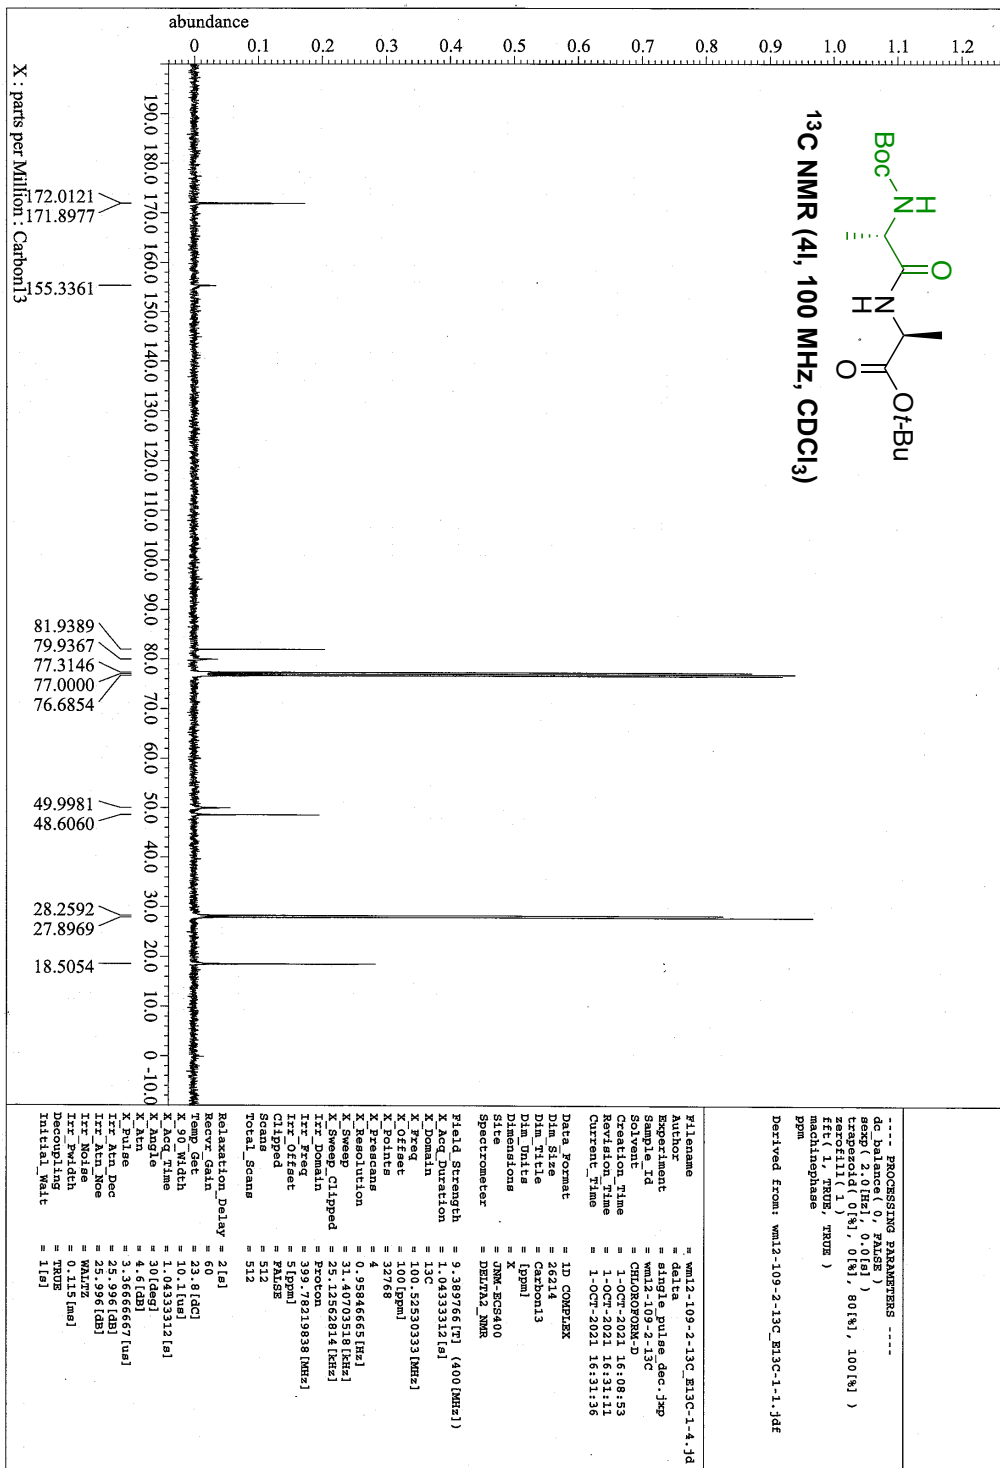

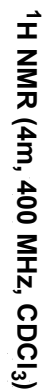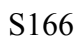

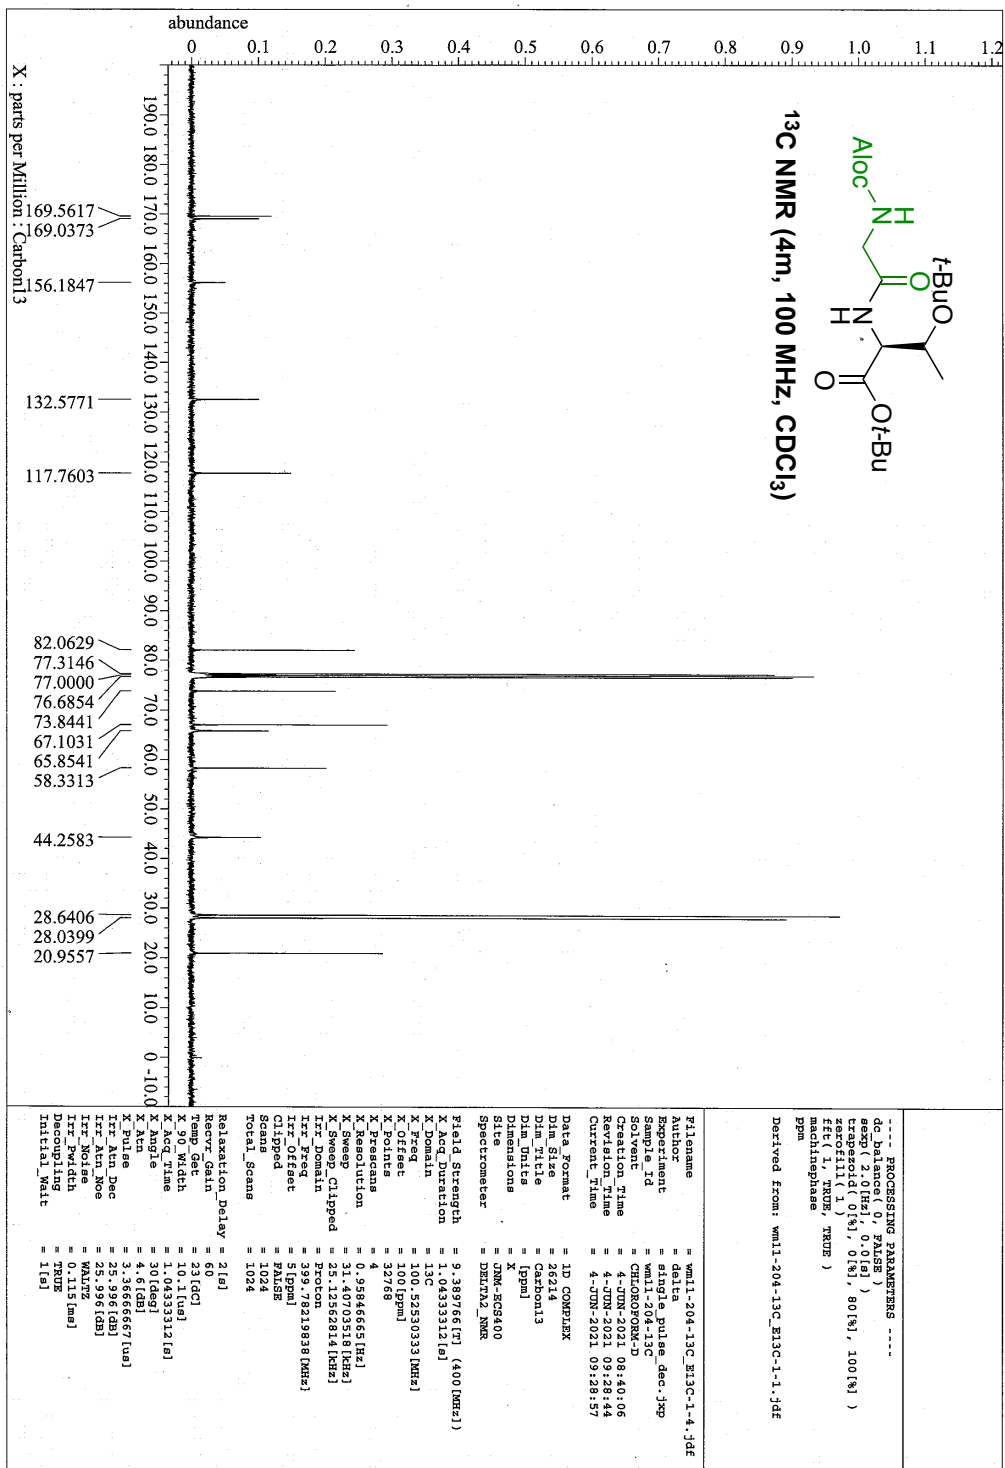

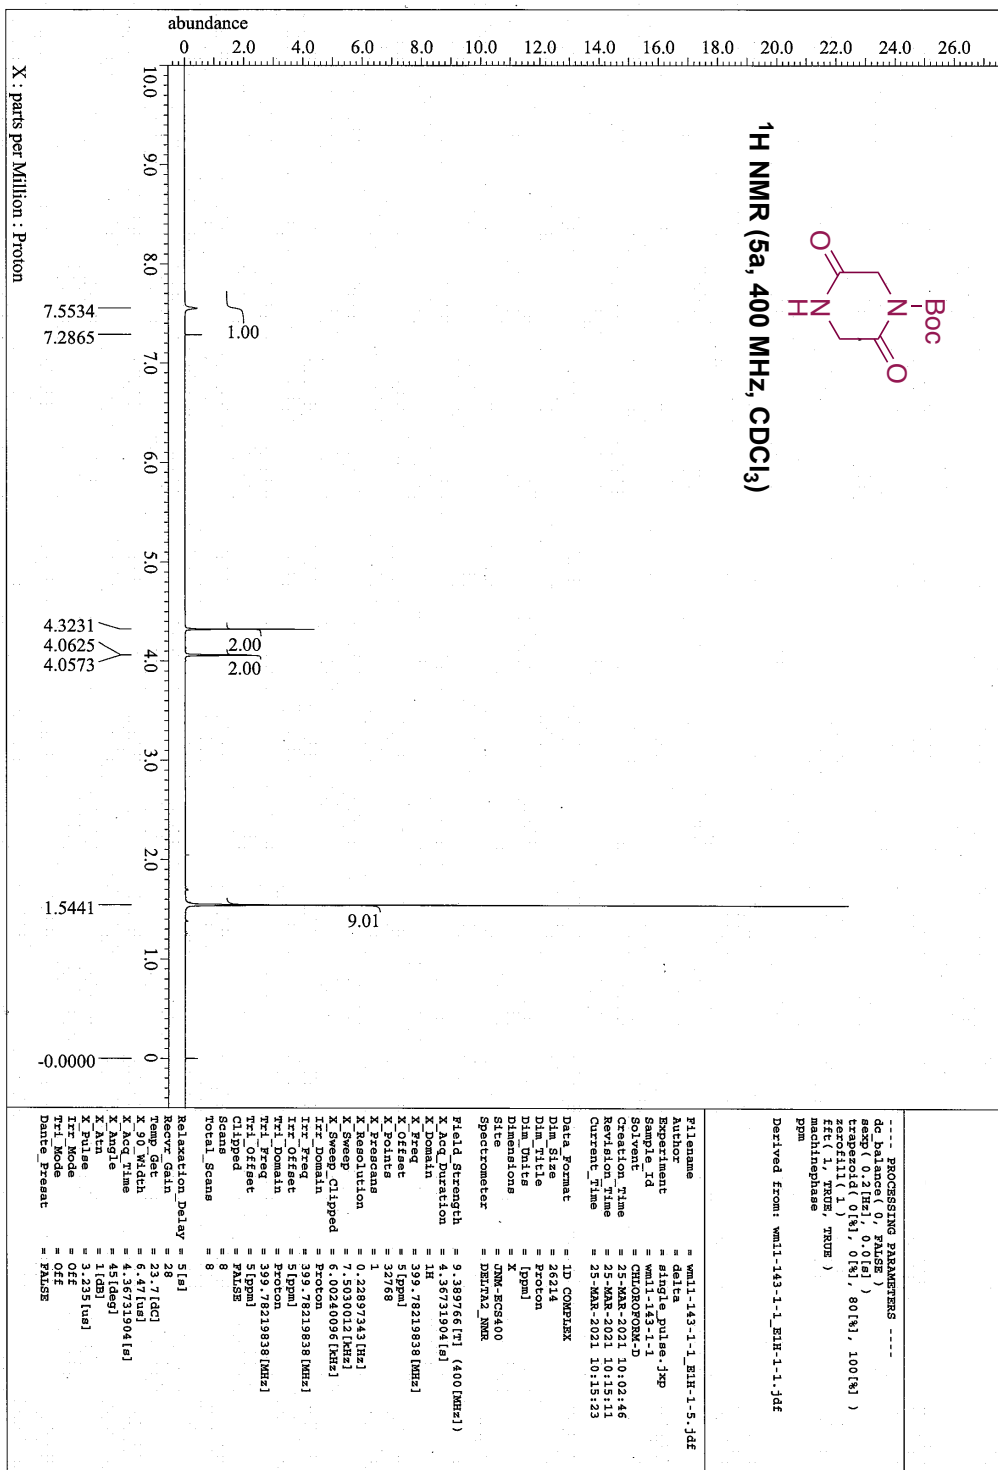

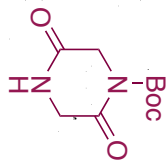

<sup>13</sup>C NMR (5a, 100 MHz, CDCl<sub>3</sub>)

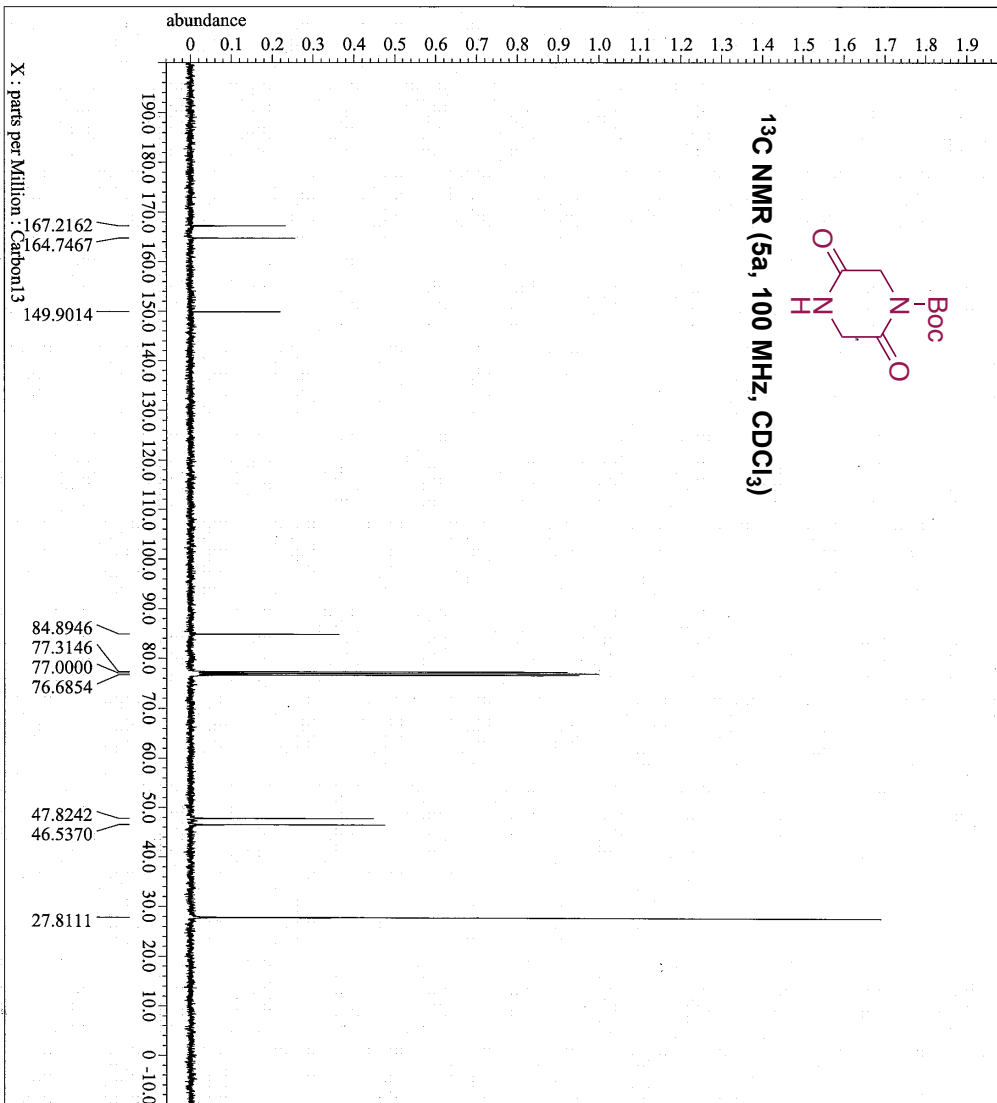

----- PROCESSING PARAMETERS -----  
 dc balance (ppm) = 2.0  
 sweep (2.0 Hz) = 0.0 [s]  
 trapezoid (0%) = 0.0 [s]  
 zero fill (1) = 1  
 etc (1, TRUE, TRUE)  
 phase = 0  
 Derived from: wml1-143-1-1-13C\_E13C-1-1.jdf

Filename = wml1-143-1-1-13C\_E13C-1-3.  
 Author = delta  
 Experiment = single\_pulse\_dec.jxp  
 Sample\_ID = wml1-143-1-1-13C  
 Solvent = CHLOROFORM-D  
 Acquisition Time = 25-MAR-2021 10:07:45  
 Revision Time = 25-MAR-2021 10:17:17  
 Current Time = 25-MAR-2021 10:17:45  
 Data Format = 1D COMPLEX  
 Dia Size = 26214  
 Dia Title = Carbon13  
 Dia Units = ppm  
 Dimensions = X  
 Site = JNM-EC6400  
 Spectrometer = DELTA2 NMR  
 Field Strength = 9.38976617 (400 MHz)  
 X\_Acq Duration = 1.0433312 [s]  
 X\_Freq = 100.5251033 [MHz]  
 X\_Offset = 32768  
 X\_Points = 4  
 X\_Frescans = 0.9584665 [Hz]  
 X\_Resolution = 31.4070318 [Hz]  
 X\_Sweep Clipped = 31.4070318 [Hz]  
 Irr Decoupl = 399.78219838 [MHz]  
 Irr\_Freq = 5 [ppm]  
 Irr\_Offset = FALSE  
 Clipped = 257  
 Scans = 257  
 Total\_Scans = 257  
 Relaxation Delay = 2 [s]  
 Recvr Gain = 23.4 [dB]  
 Temp\_Gct = 10.1 [us]  
 X\_90 Width = 1.0433312 [s]  
 X\_Acq Time = 30 [deg]  
 X\_Pulse = 3.966667 [us]  
 Irr\_Ach Dec = 25.996 [dB]  
 Irr\_Ach Noe = 25.996 [dB]  
 Irr\_Noise = WALTZ  
 Irr\_Width = 0.115 [us]  
 Decoupling = TRUE  
 Initial\_Wait = 1 [s]





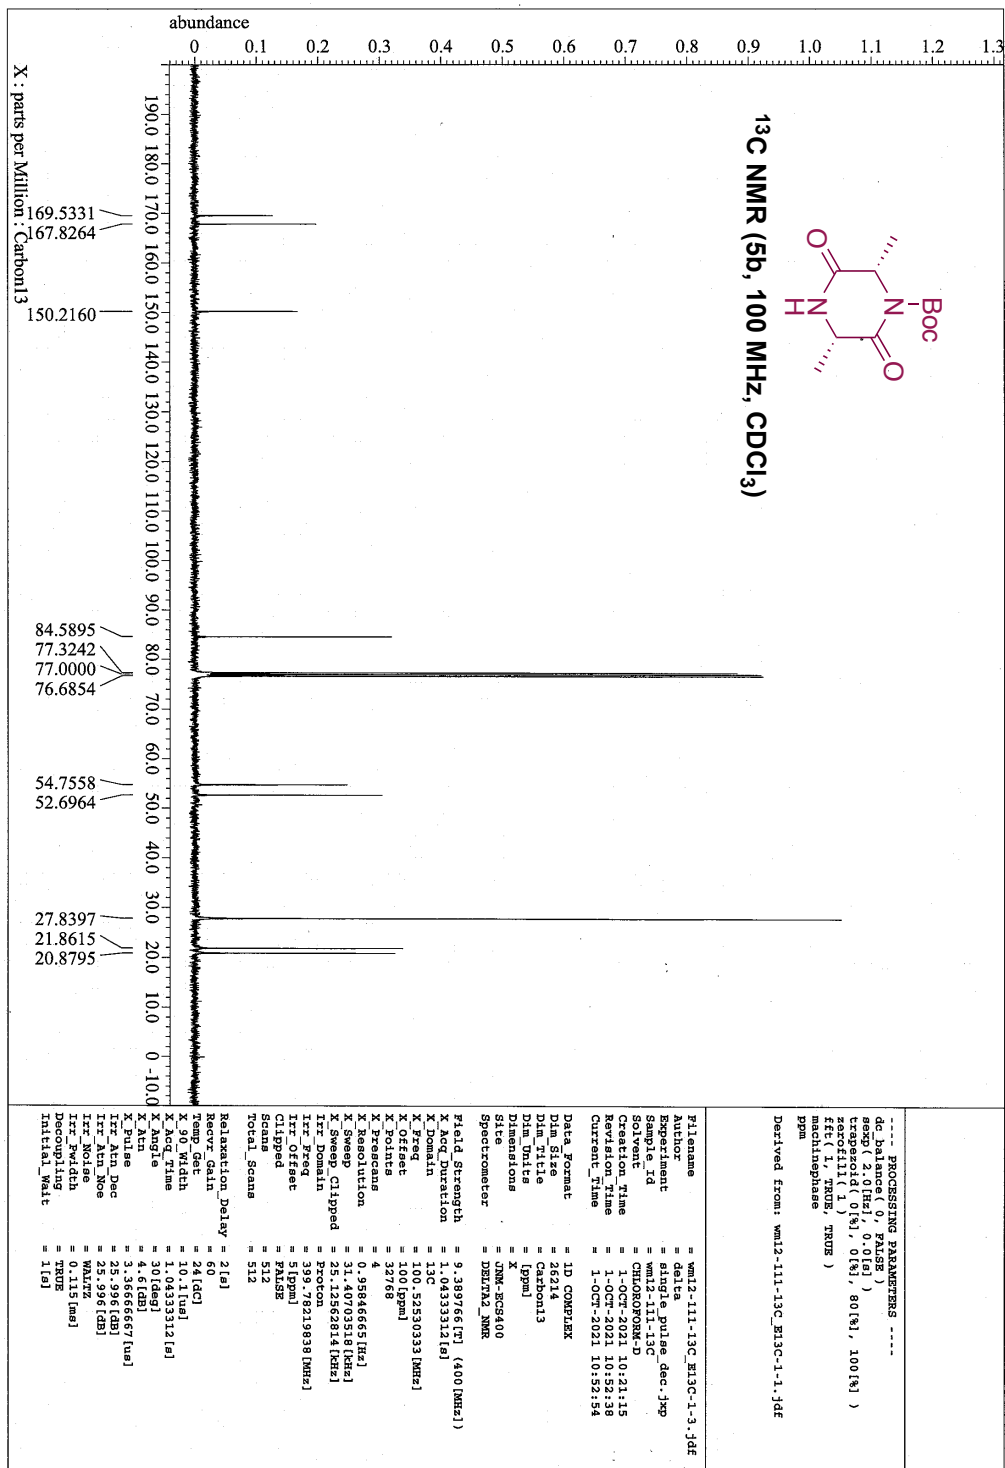



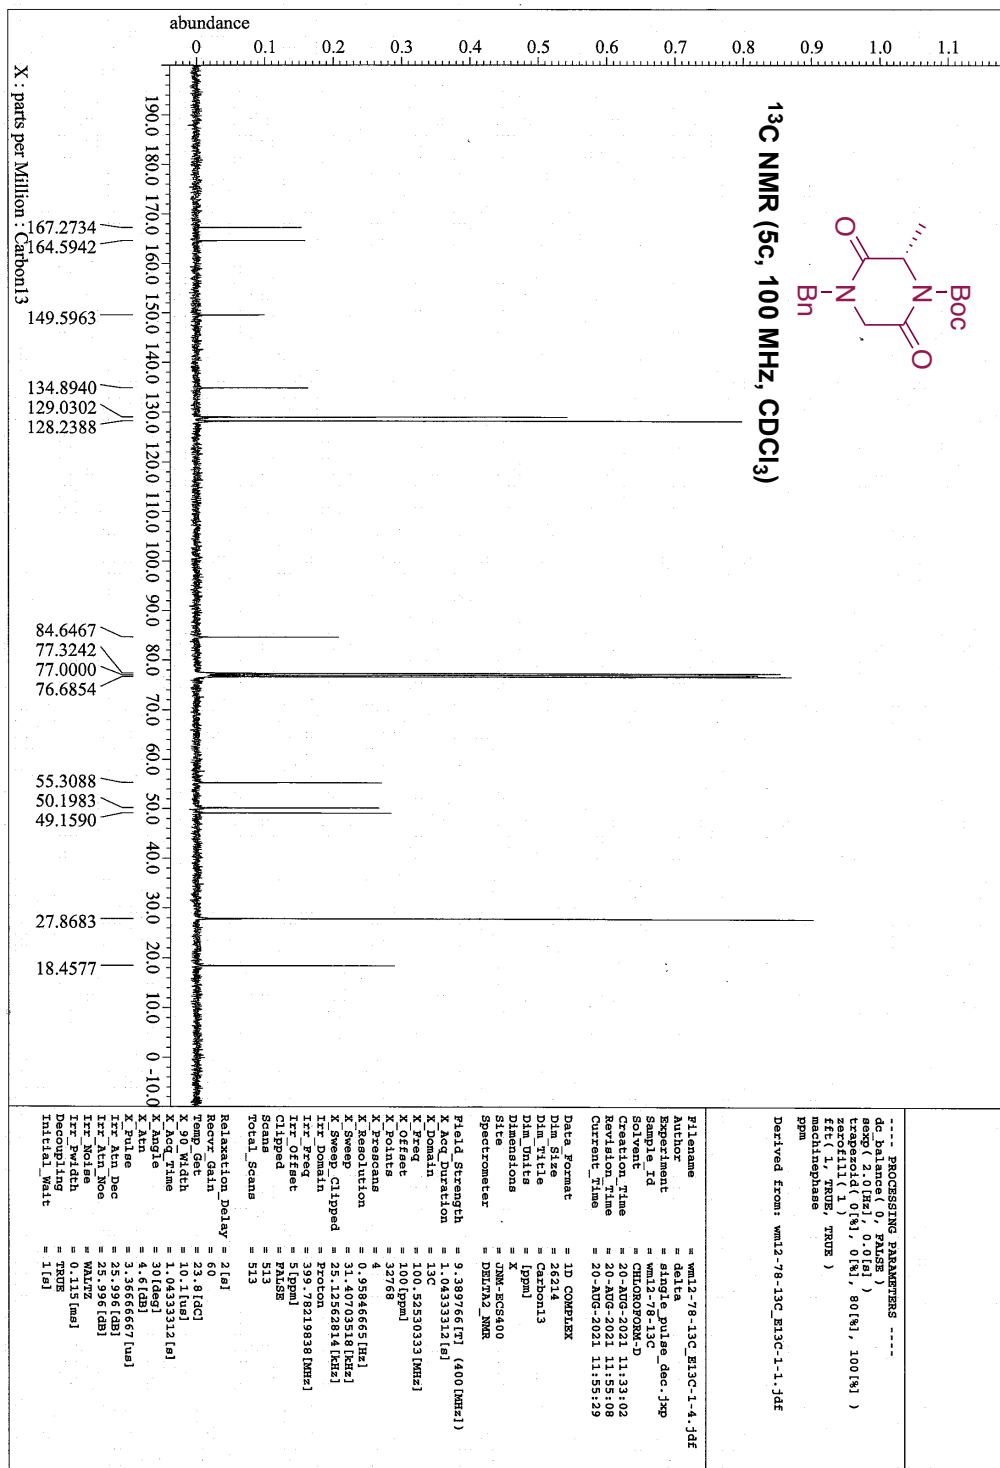



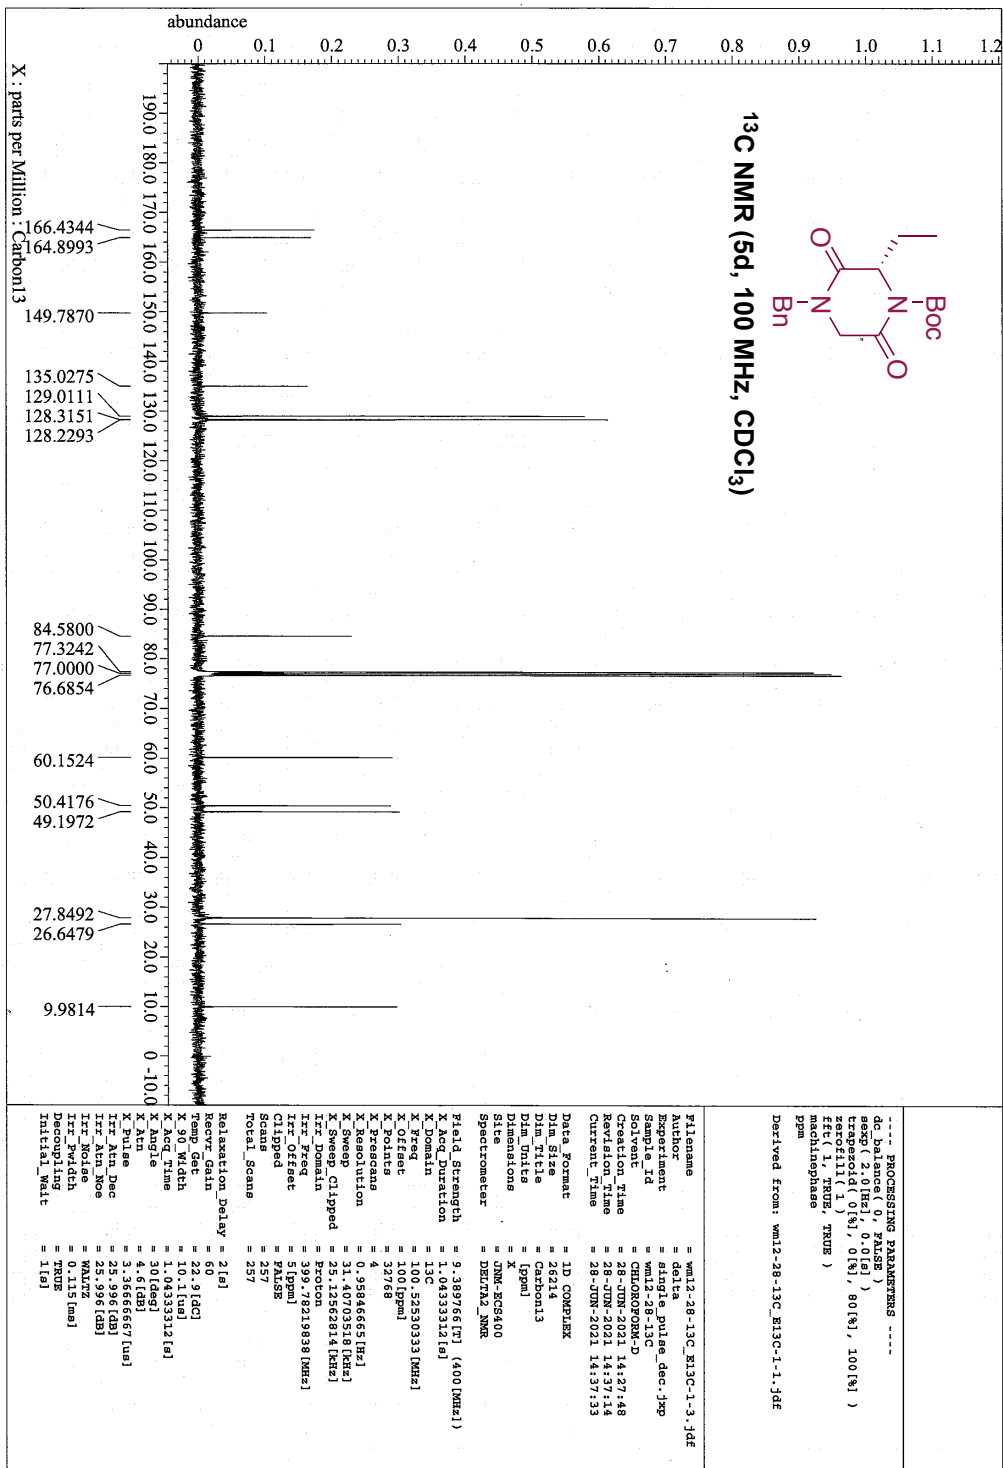

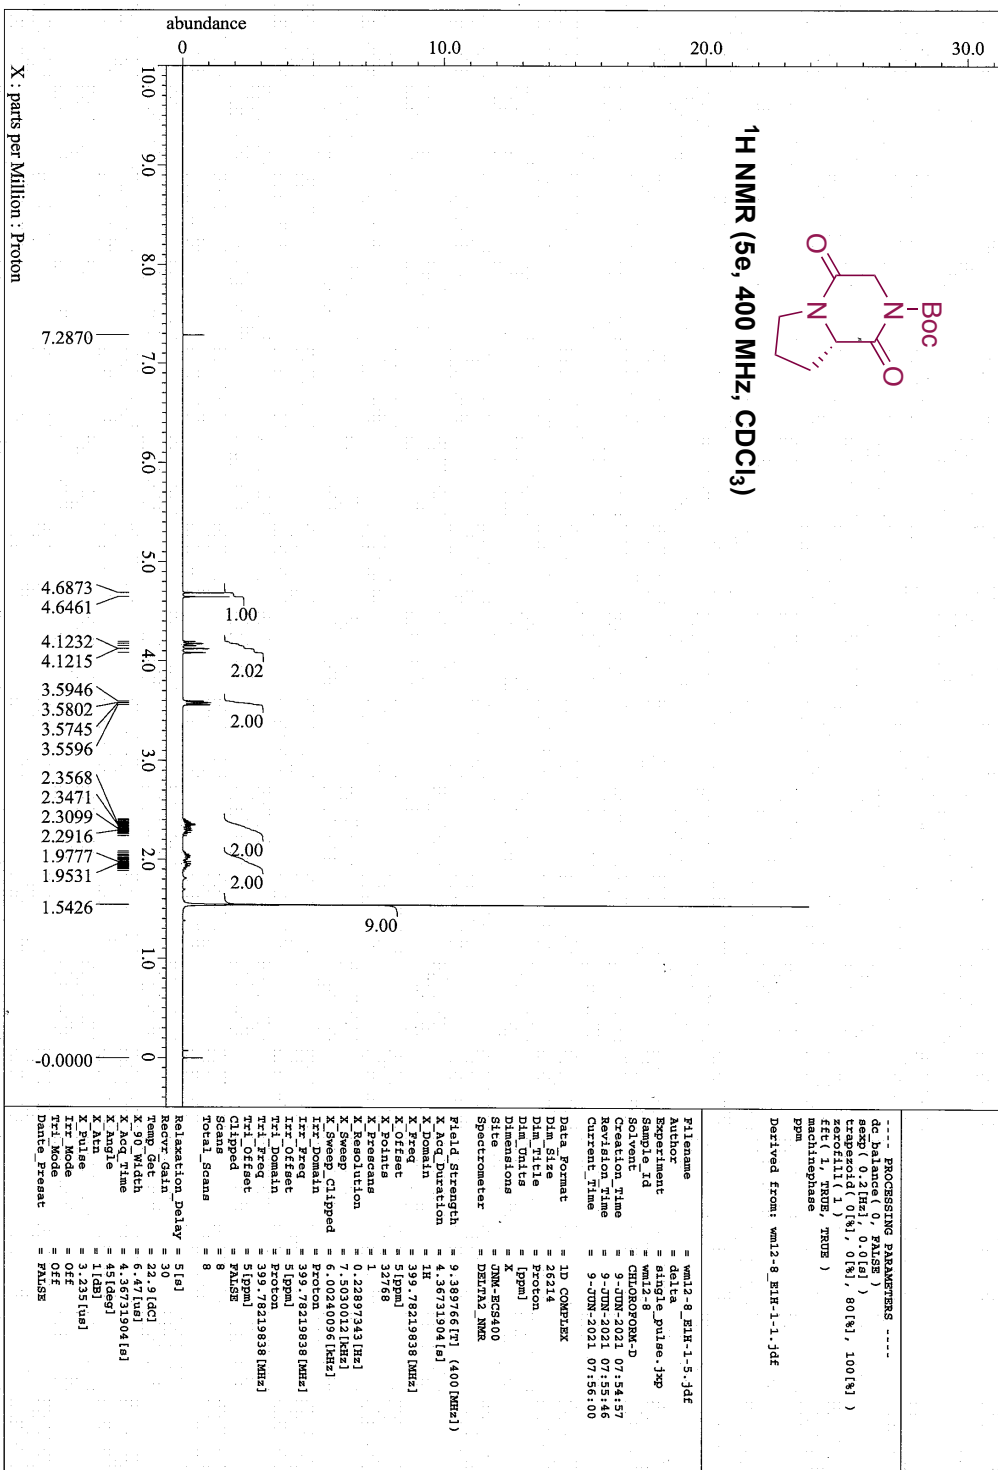

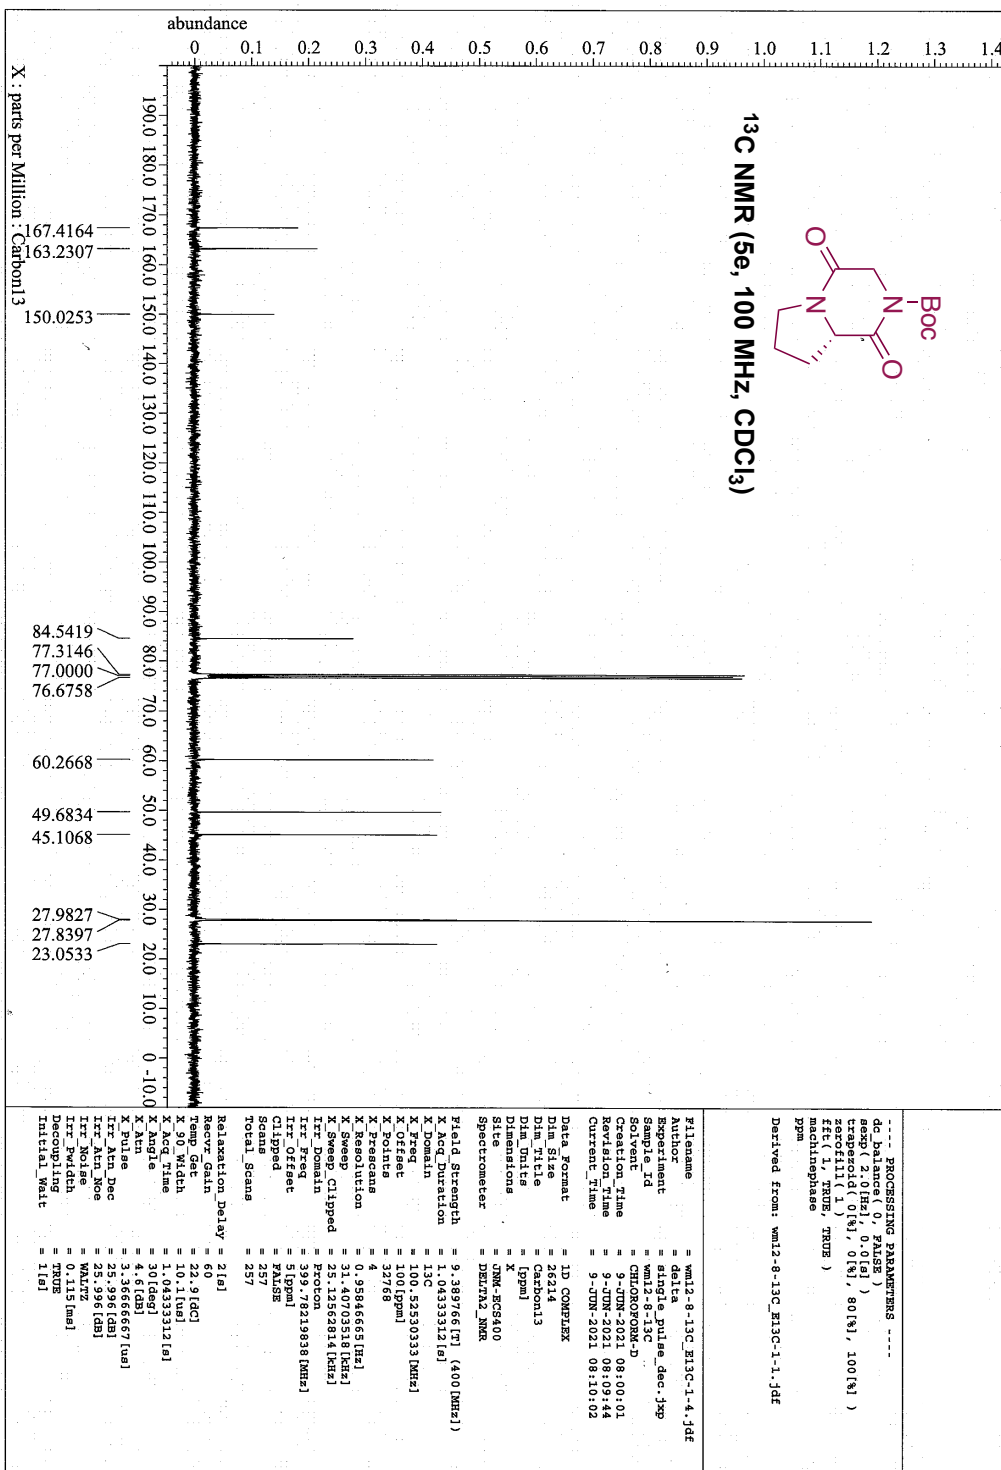





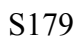



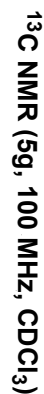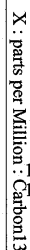

Derived from: wm12-107-1-1-13C\_E13C-1-1.jdd

|                  |                           |
|------------------|---------------------------|
| Filename         | waht2-107-1-1-13C.M3C-1.4 |
| Author           | = Delta                   |
| Experiment       | = single-pulse_acq.jsp    |
| Sample           | = CHOLEROFORM-D           |
| Solvent          | = CHLOROFORM-D            |
| Creation Time    | = 29-SEP-2021 08:11:12    |
| Revision Time    | = 29-SEP-2021 08:33:52    |
| Current Time     | = 29-SEP-2021 08:34:14    |
| Data Format      | = 2D COMPLEX              |
| Dir Title        | = CASHOLIN                |
| Dir Units        | = [ppm]                   |
| Dimensions       | = x                       |
| Site             | = JMR-ECG400              |
| Spectrometer     | = DELTA2 JNM              |
| Yield Strength   | = 7.3897661E7 (1400 (Hz)) |
| Yield Resolution | = 130.64539312 [Hz]       |
| X Domain         | = 100.52303033 [MHz]      |
| X Freq           | = 100 [ppm]               |
| X Offset         | = 32765                   |
| X Points         | = 4                       |
| X Prescans       | = 0.9584666 [Hz]          |
| X Resolution     | = 25.11550284 [Hz]        |
| X Sweep Clipped  | = 25.11550284 [Hz]        |
| Yr Domain        | = 399.78219385 [MHz]      |
| Yr Freq          | = 5 [ppm]                 |
| Yr Offset        | = FALSE                   |
| Yr Clipped       | = 512                     |
| Scans            | = 512                     |
| Total Scans      | = 512                     |
| Relaxation Delay | = 2160                    |
| Reacv Gain       | = 60                      |
| Temp Gdn         | = 23.5 [dC]               |
| X 90 Width       | = 10.1 [nu]               |
| X Acq Time       | = 1.04333312 [s]          |
| X Angle          | = 30 [deg]                |
| X Phase          | = 3.6566667 [rad]         |
| Yr Aqn Dec       | = 25.996 [dB]             |
| Yr Aqn Noe       | = 25.996 [dB]             |
| Yr Noize         | = WALTZ                   |
| Yr Pwldch        | = 0.015 [ms]              |
| Decoupling       | = TRUE                    |
| Initial Wate     | = 1 [a]                   |







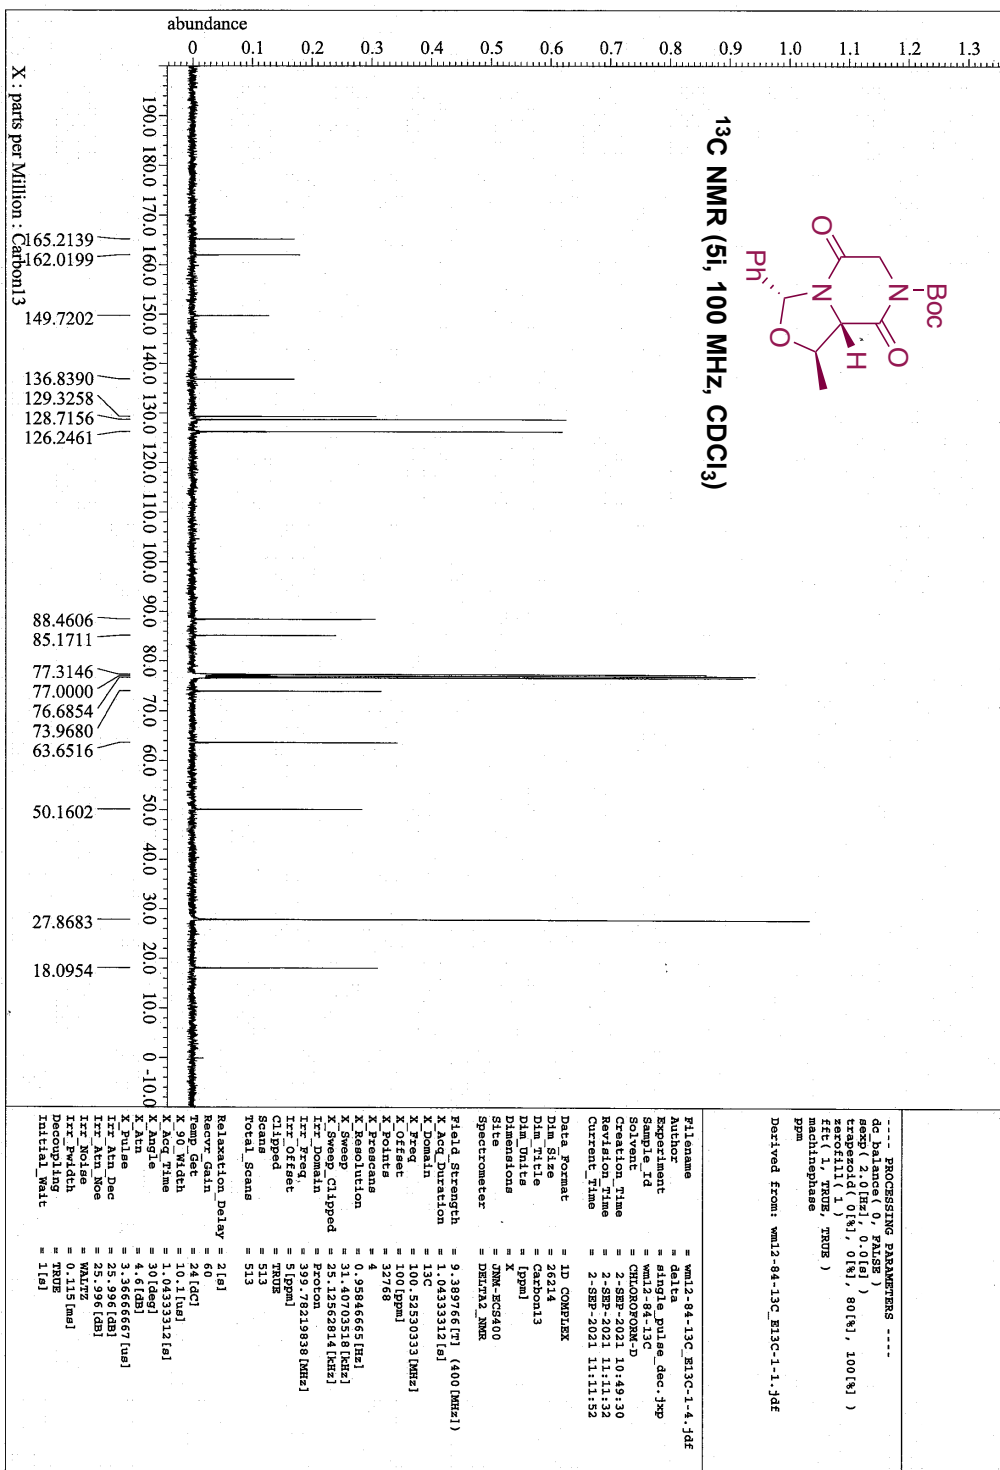

















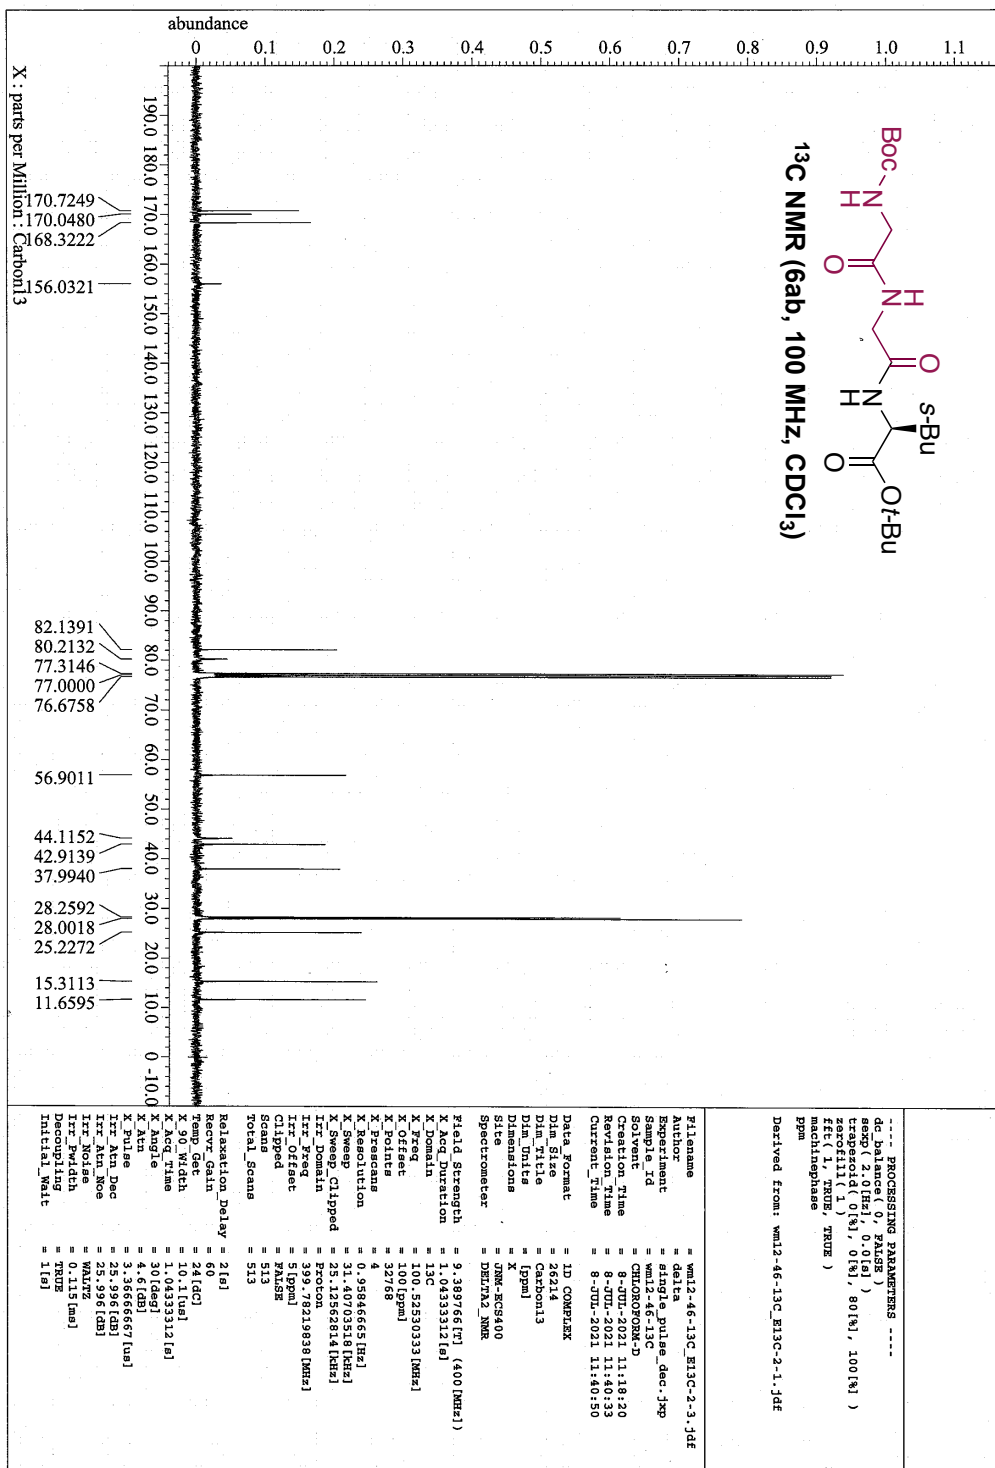

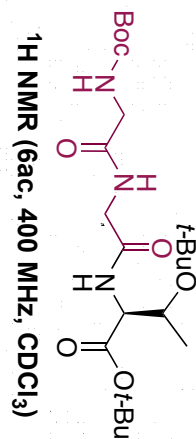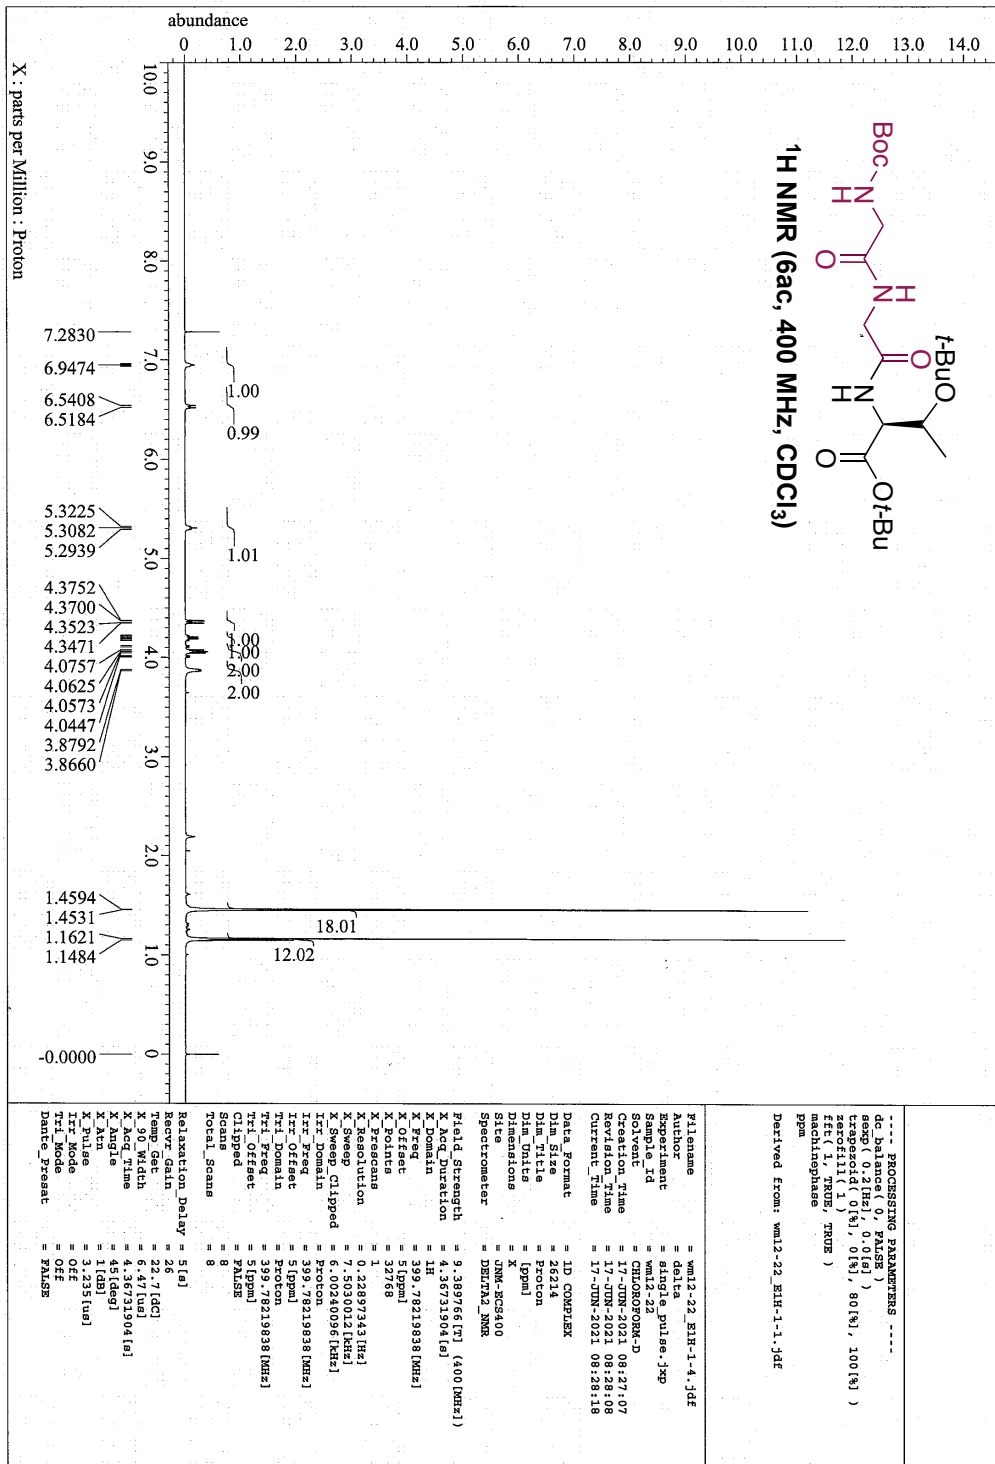





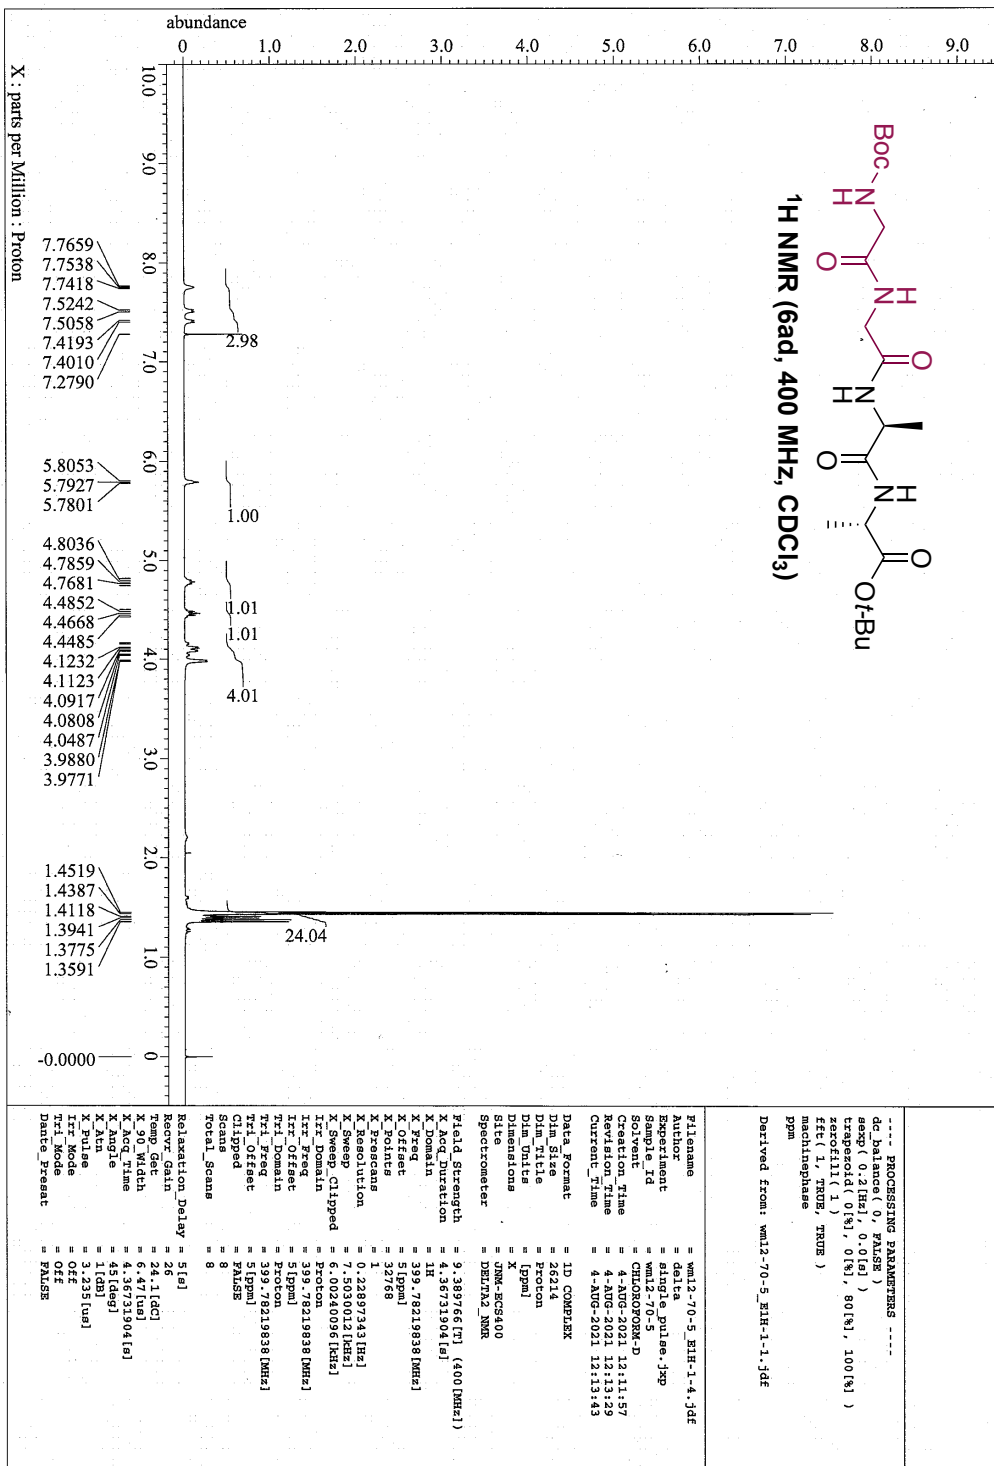











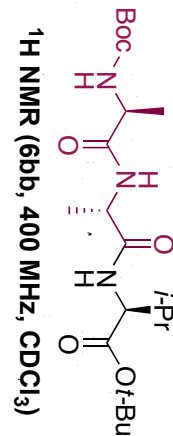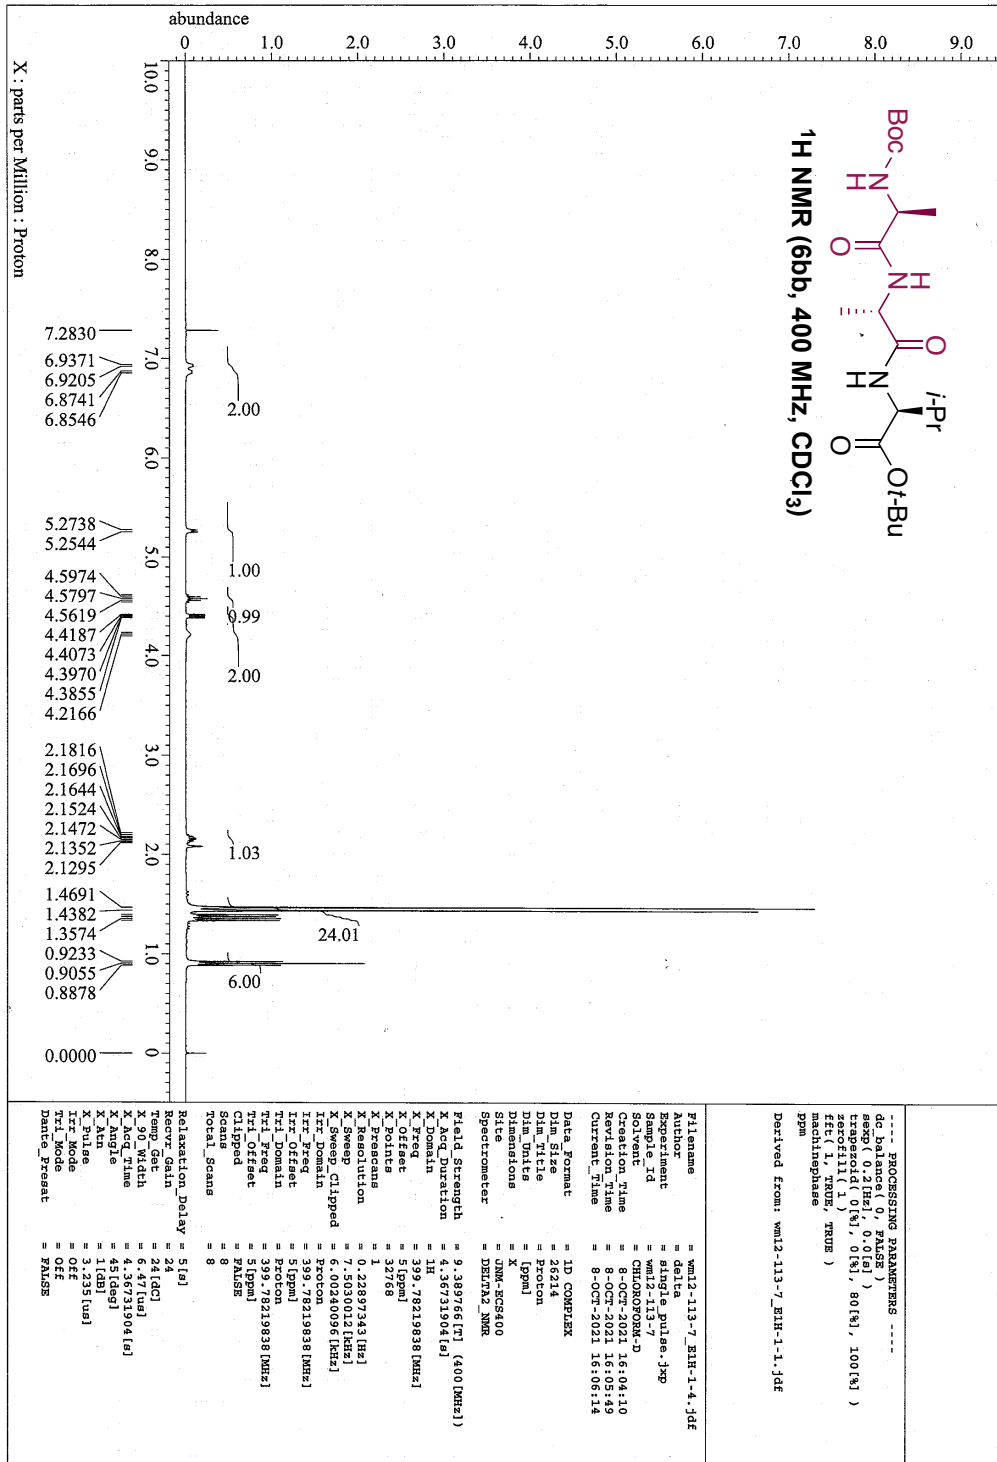



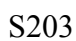



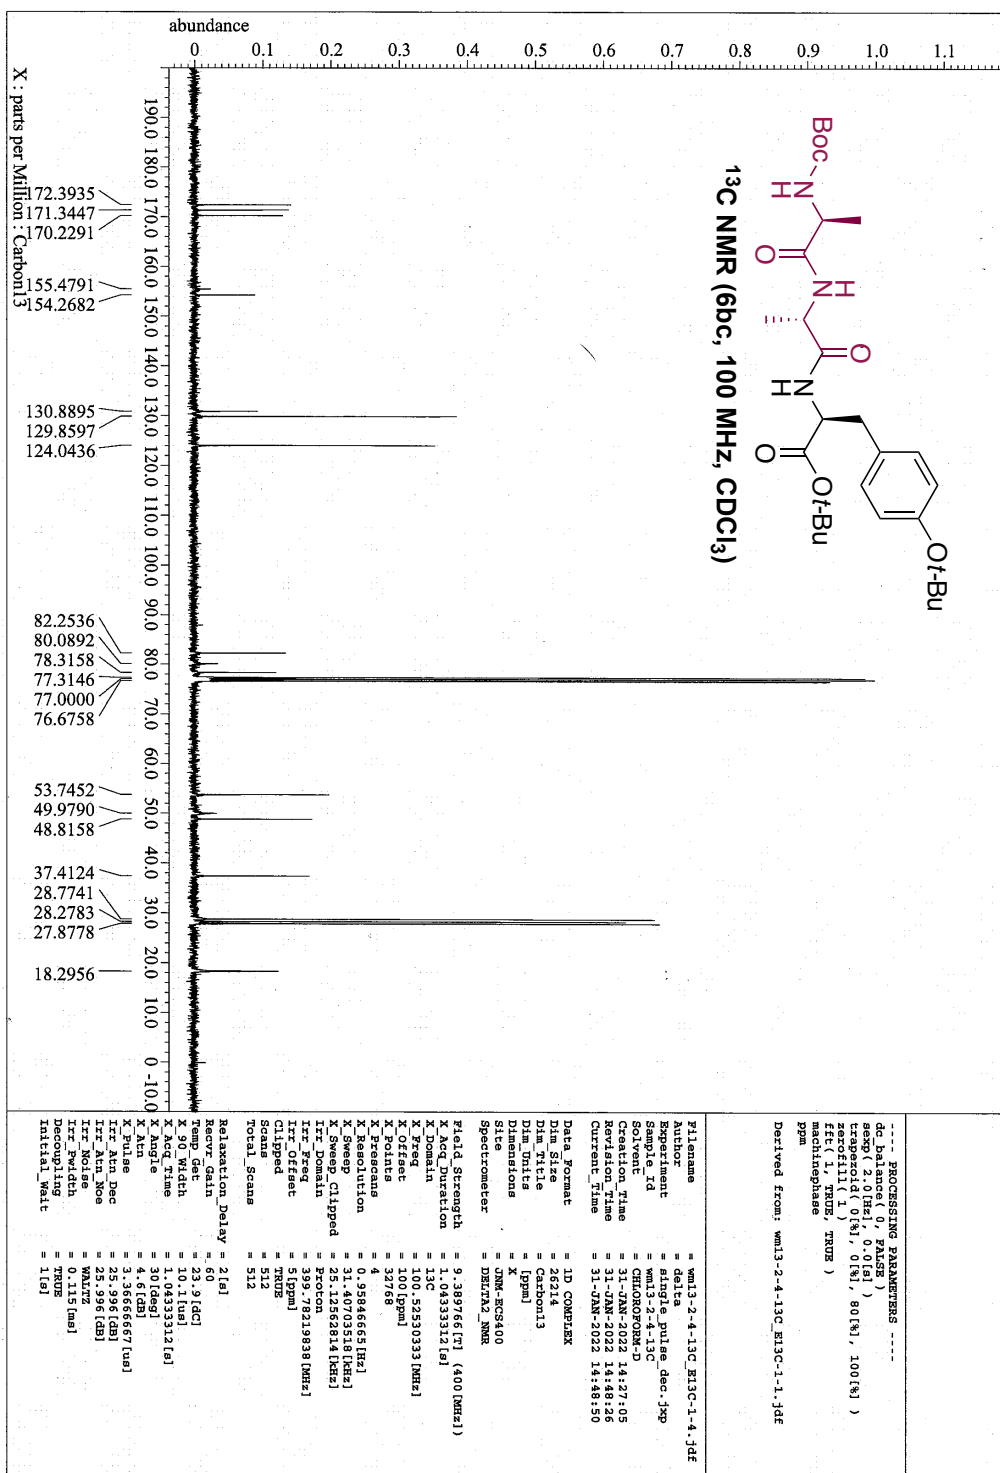

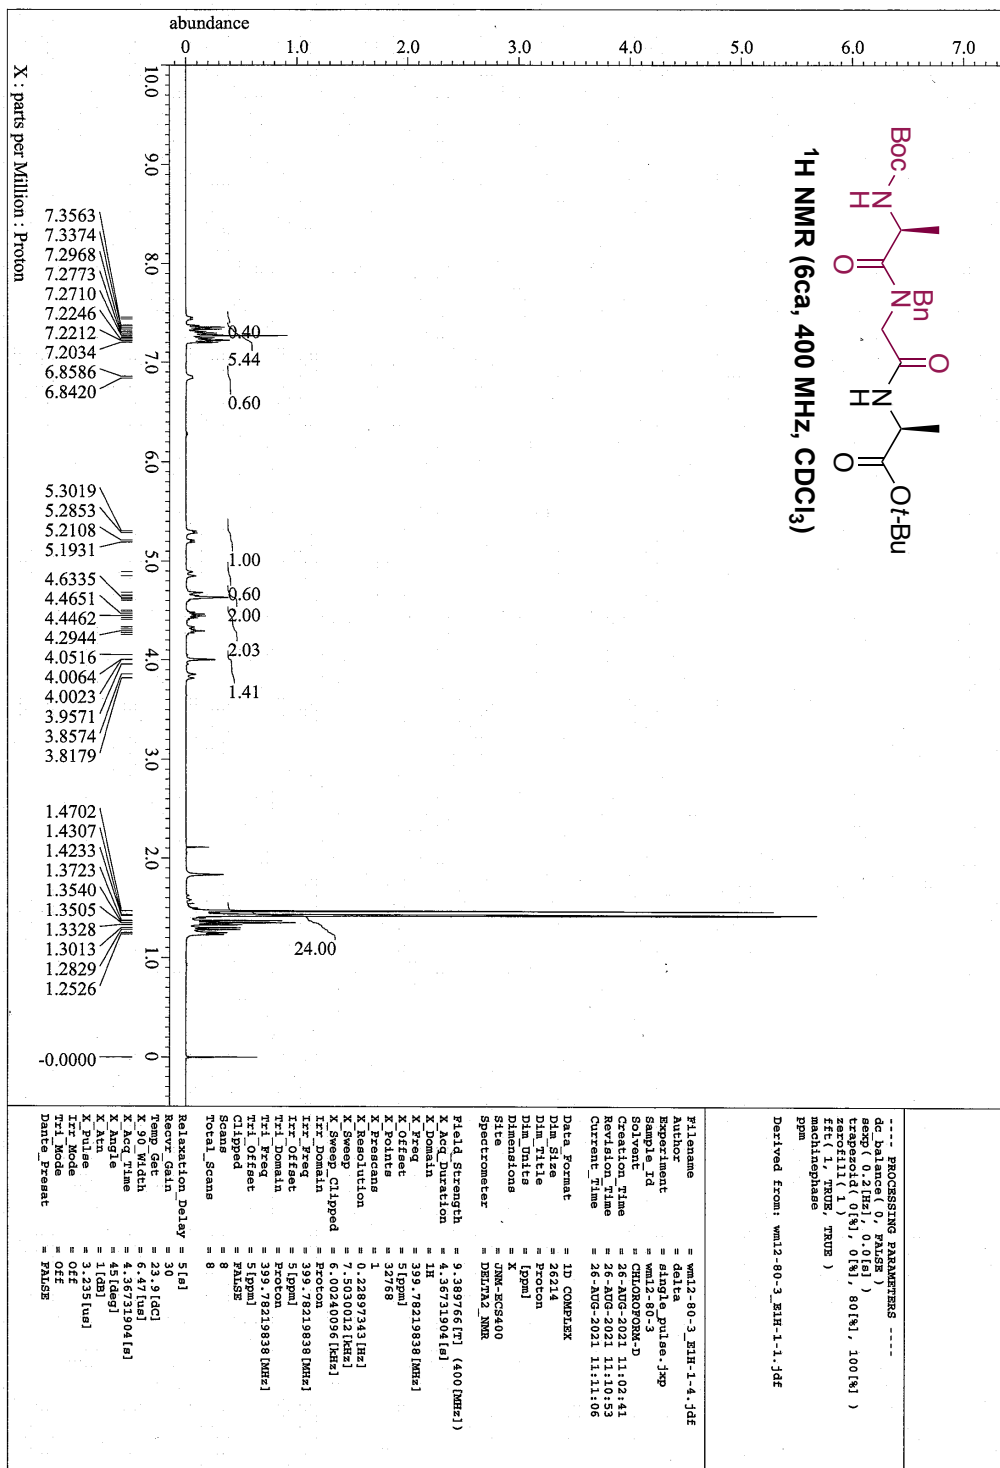

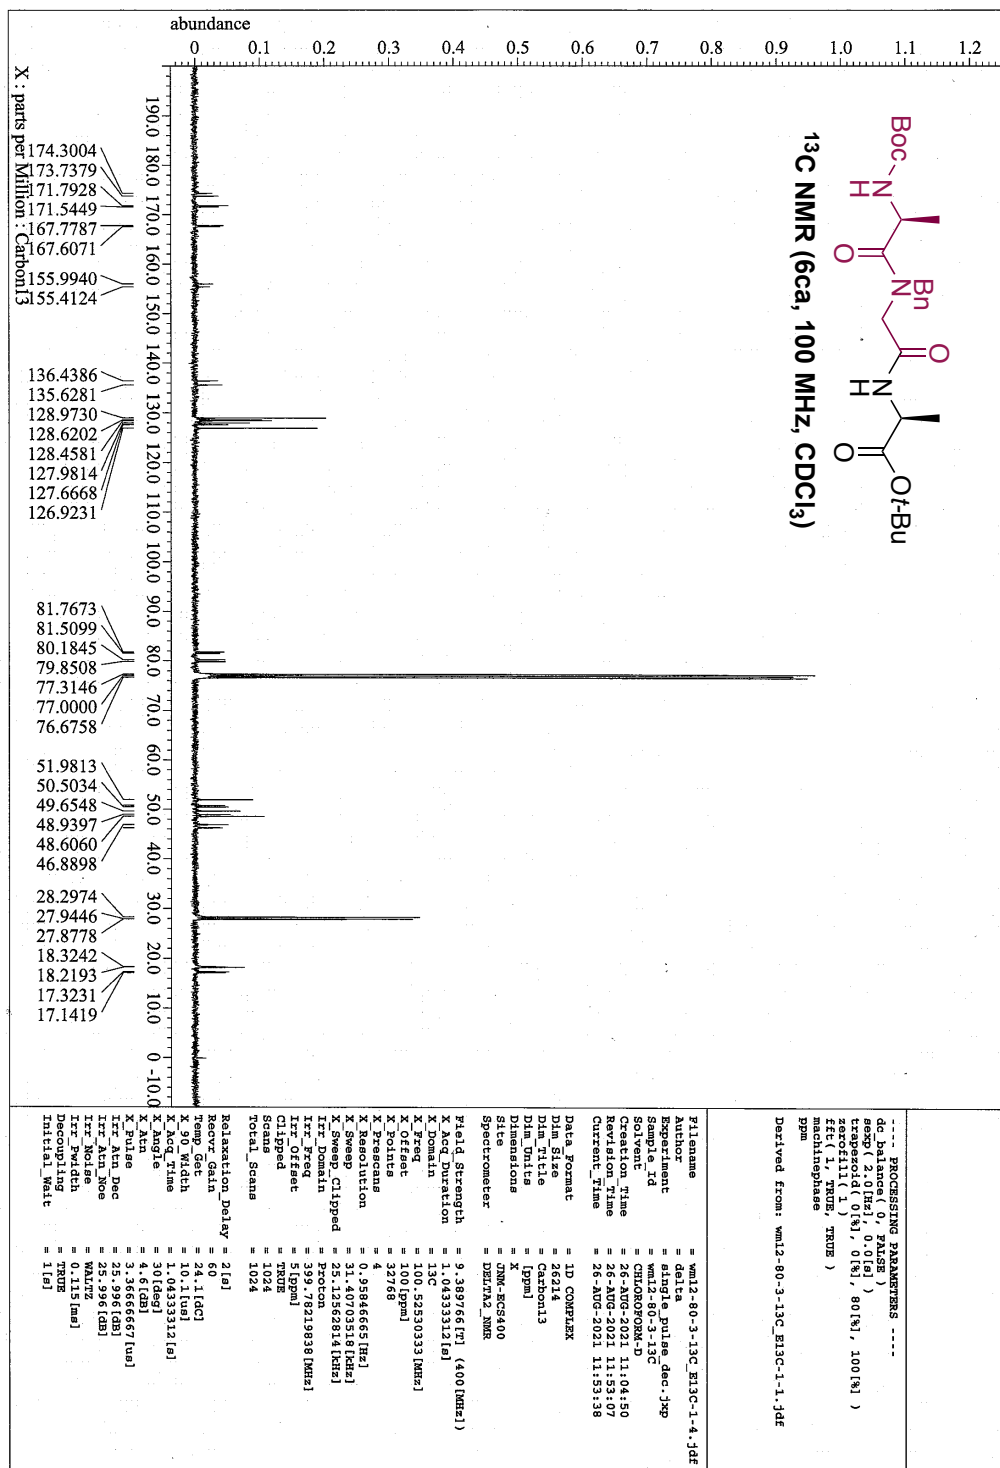



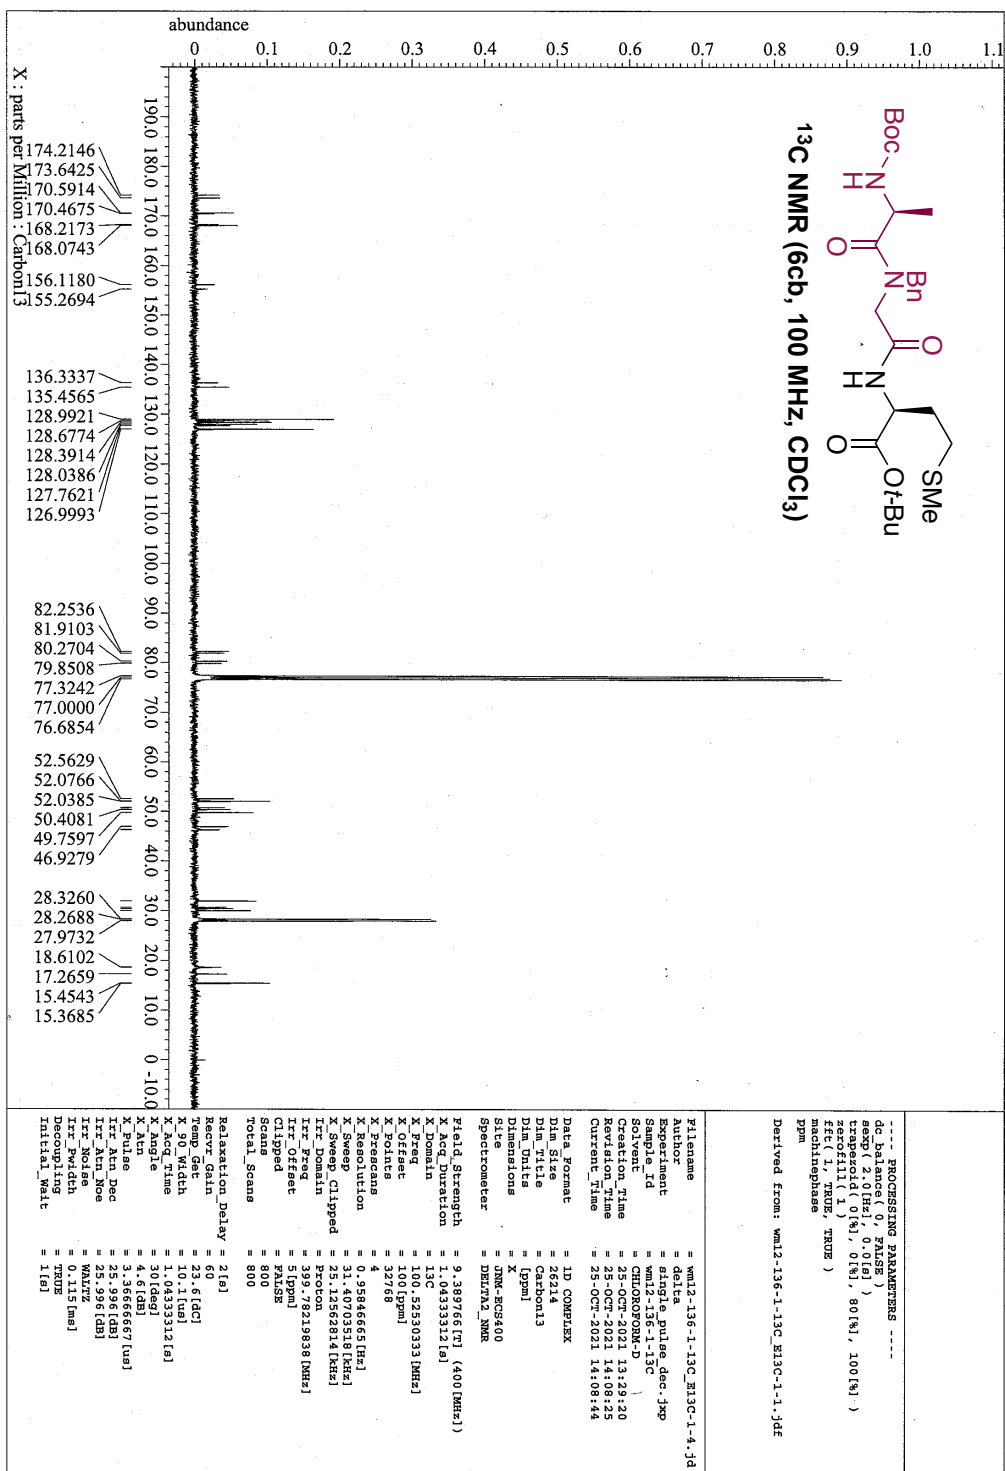

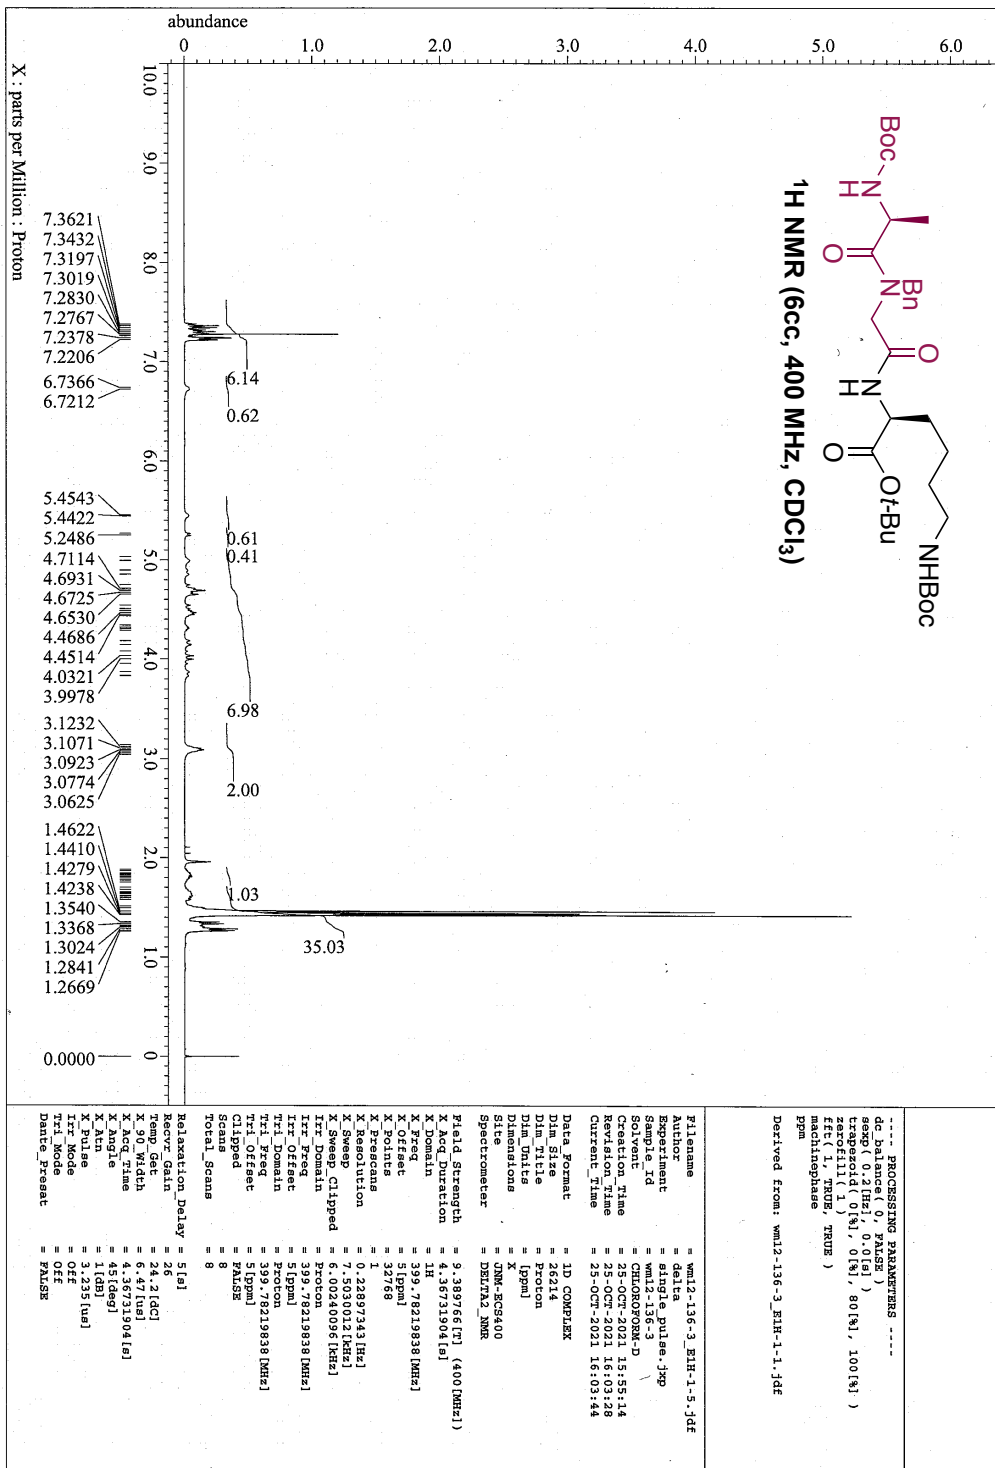



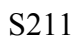

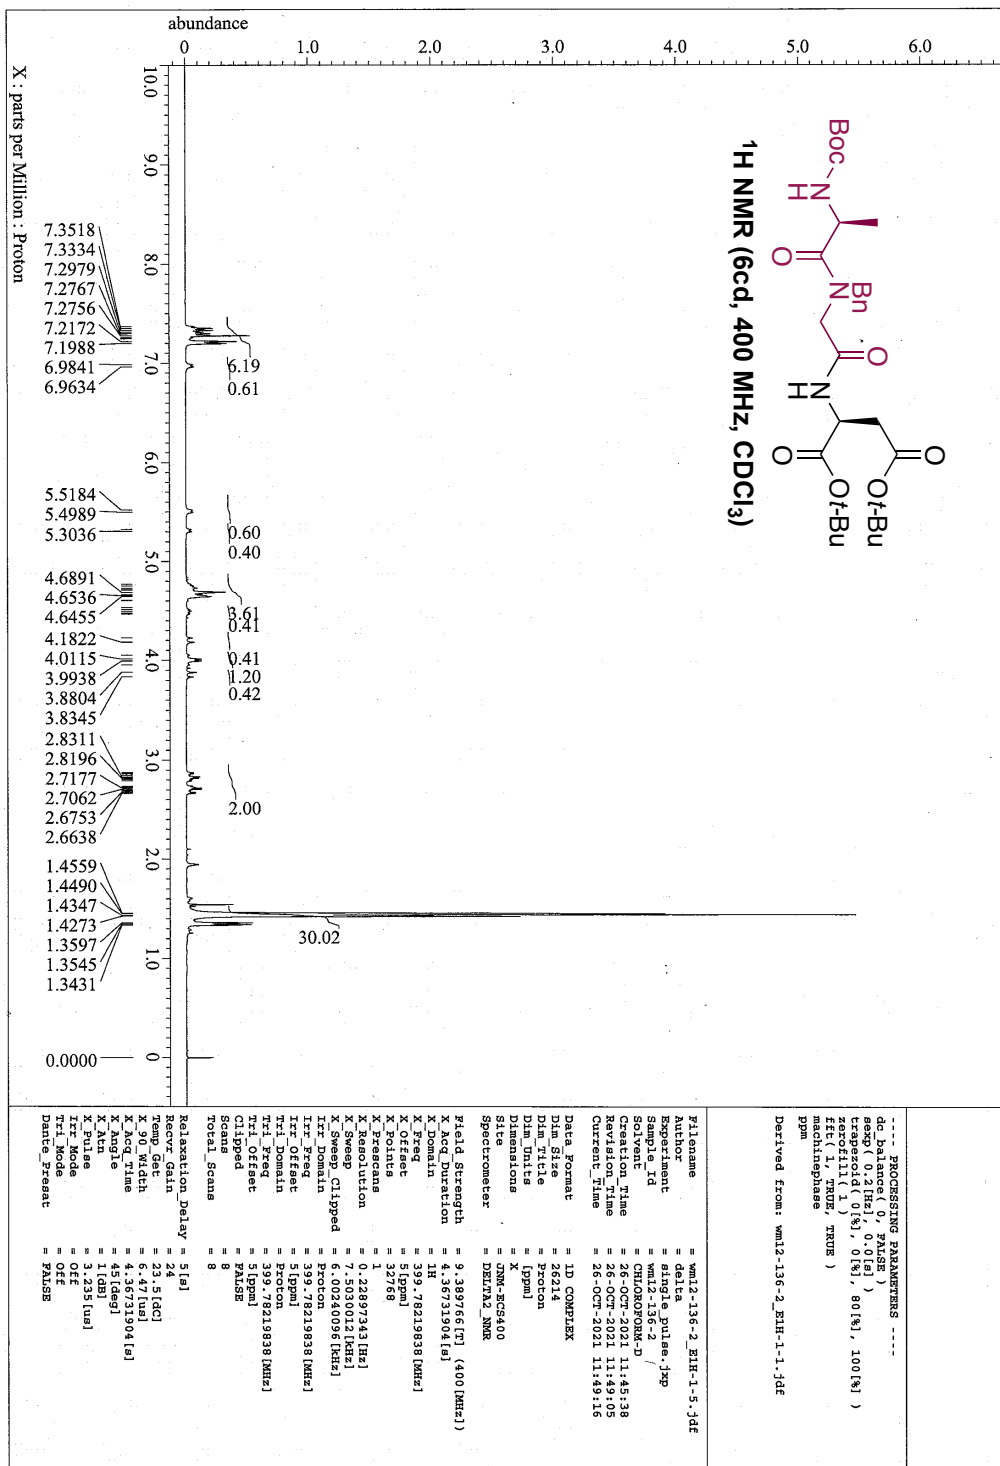







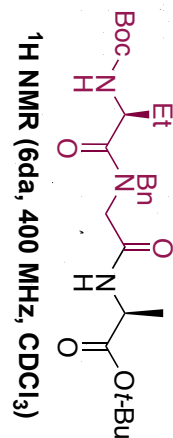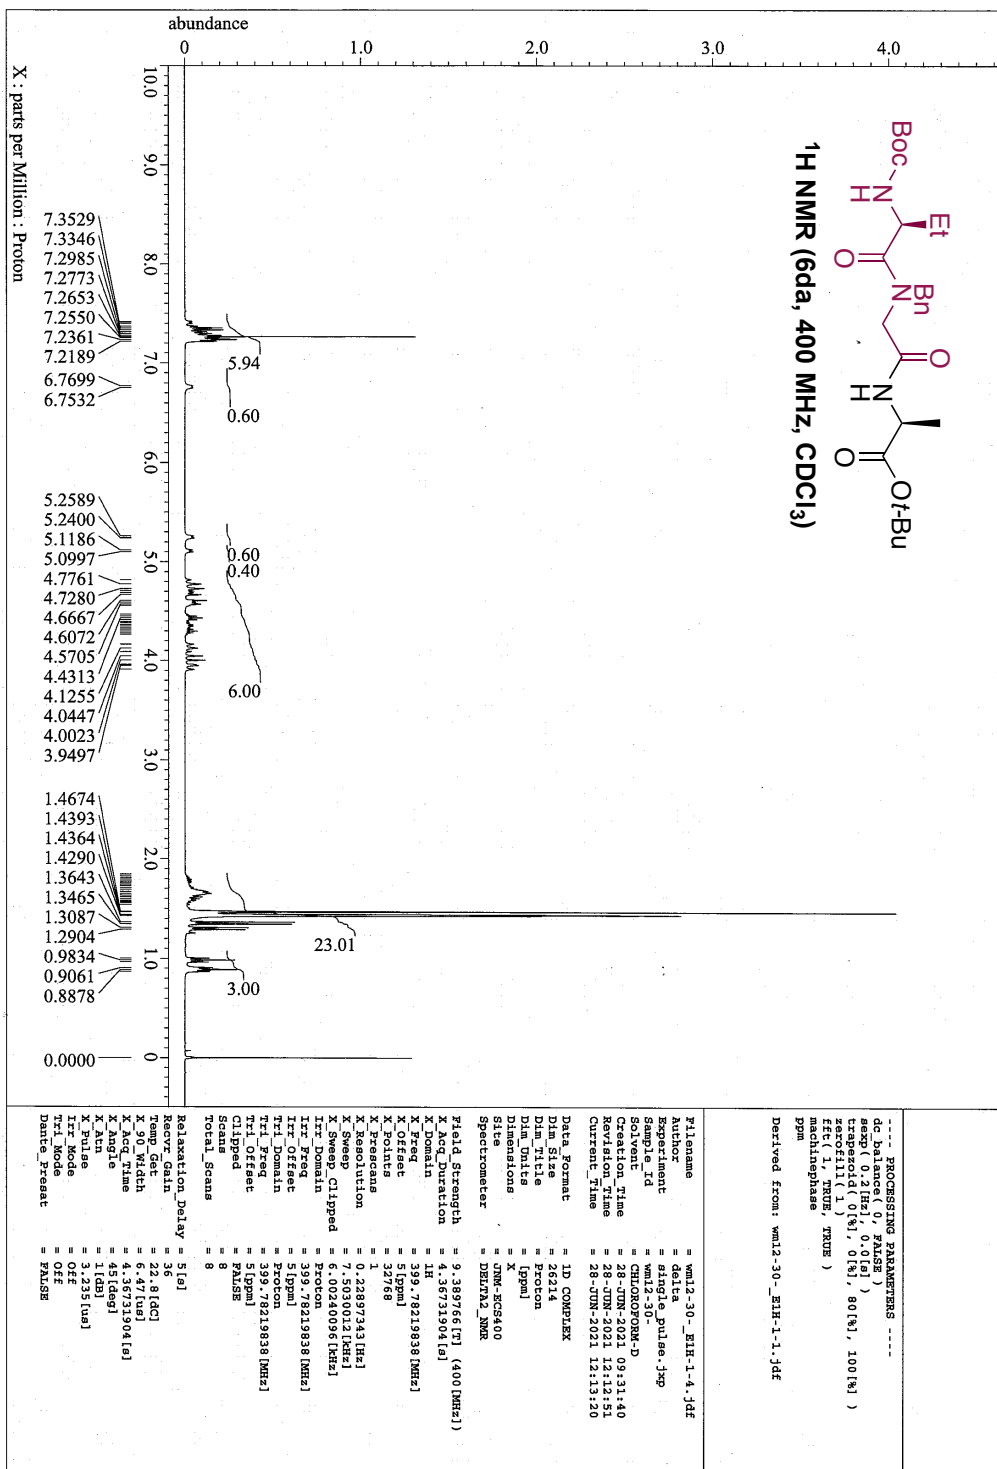

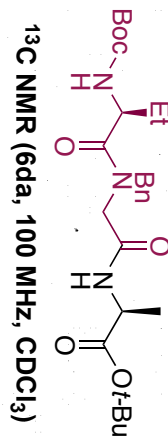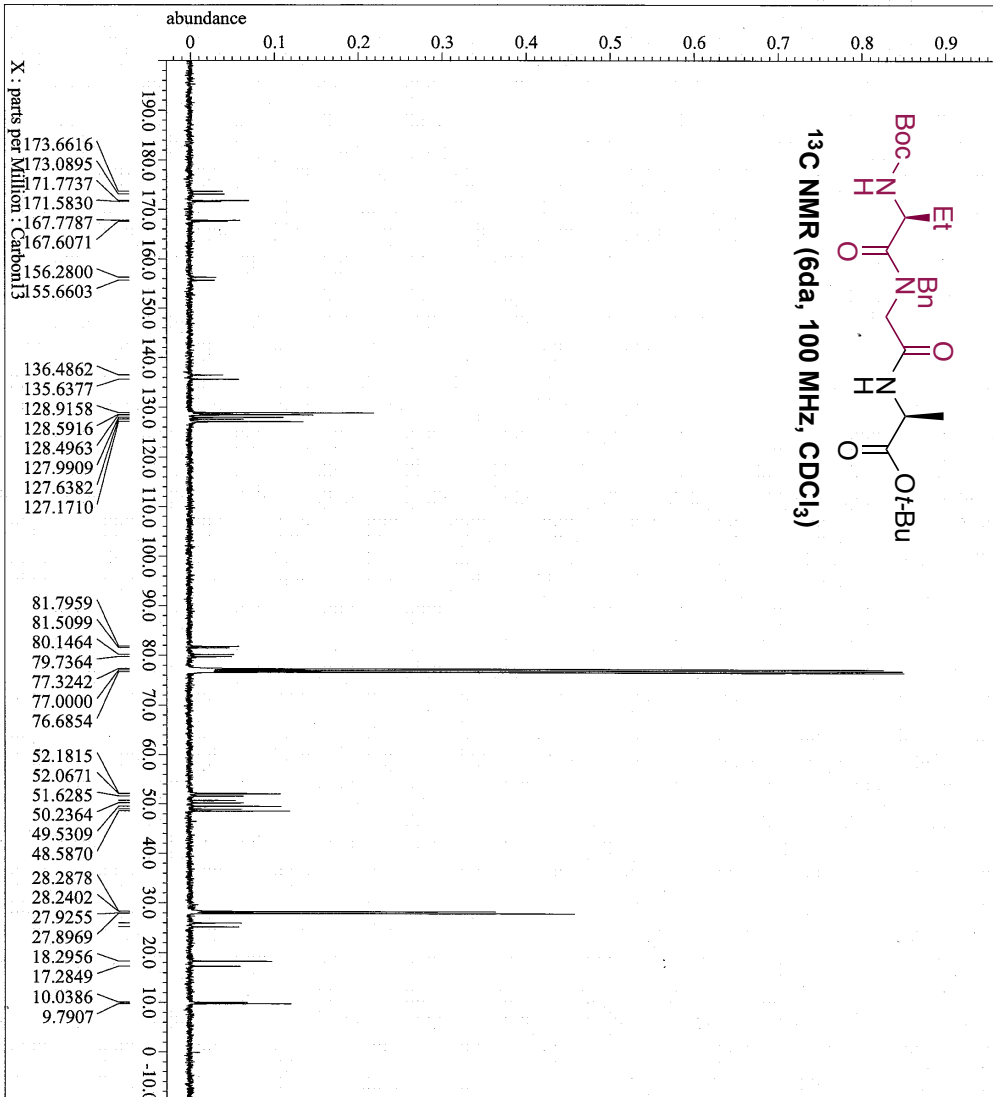

--- PROCESSING PARAMETERS ---  
 dc balance (0, FALSE)  
 gamma (150, 150.00000000000000)  
 trap (0, 0.0000000000000000)  
 trap (0, 0.0000000000000000)  
 ref (1, TRUE, TRUE)  
 machine phase  
 ppm  
 Derived from: wml2-30-13C\_E13C-1-1.jdf

Filename = wml2-30-13C\_E13C-1-1.jdf  
 Author = delta  
 Experiment = single\_pulse\_dec.jxp  
 Sample\_id = wml2-30-13C  
 Solvent = CHLOROFORM-D  
 Creation\_time = 28-JUN-2021 08:05:35  
 Acquisition\_time = 28-JUN-2021 08:21:13  
 Current\_time = 28-JUN-2021 09:21:13  
 Data Format = 1D COMPLEX  
 Data Size = 26214  
 Data Title = Carbon13  
 Data Units = ppm  
 Dimensions = 1  
 Site = DMW-EC9400  
 Spectrometer = DELTA2\_NMR  
 Field Strength = 9.39766 [T] (400 MHz)  
 X\_Acq\_Duration = 1.0433312 [s]  
 X\_Domain = 13C 52530333 [MHz]  
 X\_Sweep = 100 [ppm]  
 X\_Offset = 32768  
 X\_Points = 4  
 X\_Prescans = 0.9584665 [Hz]  
 X\_Resolution = 31.40703518 [Hz]  
 X\_Sweep\_Clippped = 25.12562814 [Hz]  
 X\_Domain = 399.78219838 [MHz]  
 Irr\_Freq = 5 [ppm]  
 Irr\_Offset = FALSE  
 Clipped = FALSE  
 Scans = 1521  
 Total\_Scans = 1521  
 Relaxation\_Delay = 2 [s]  
 Relaxation\_Gate = 23 [s]  
 Temp\_Gate = 10.1 [ms]  
 X\_Acq\_Time = 1.0433312 [s]  
 X\_Angle = 30 [deg]  
 X\_Pulse = 4.6 [dB]  
 X\_Pulse\_Dec = 2.9684667 [ms]  
 Irr\_Atn\_Noe = 25.996 [dB]  
 Irr\_Noise = WALTZ  
 Irr\_Pyldth = 0.115 [ms]  
 Decoupling = TRUE  
 Initial\_Wait = 1 [s]







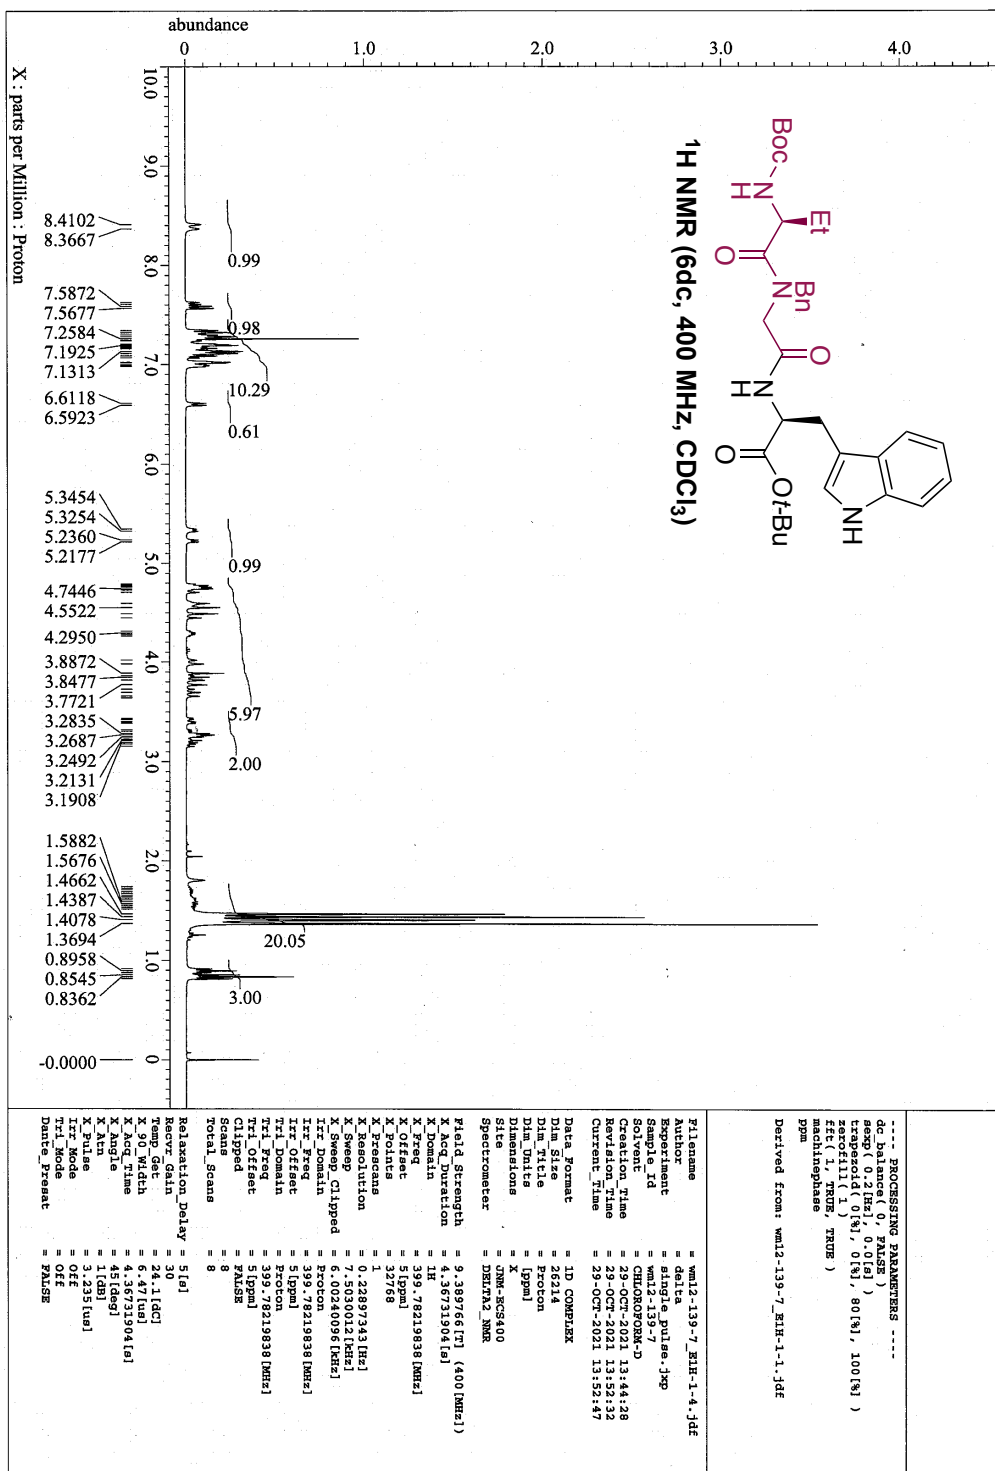

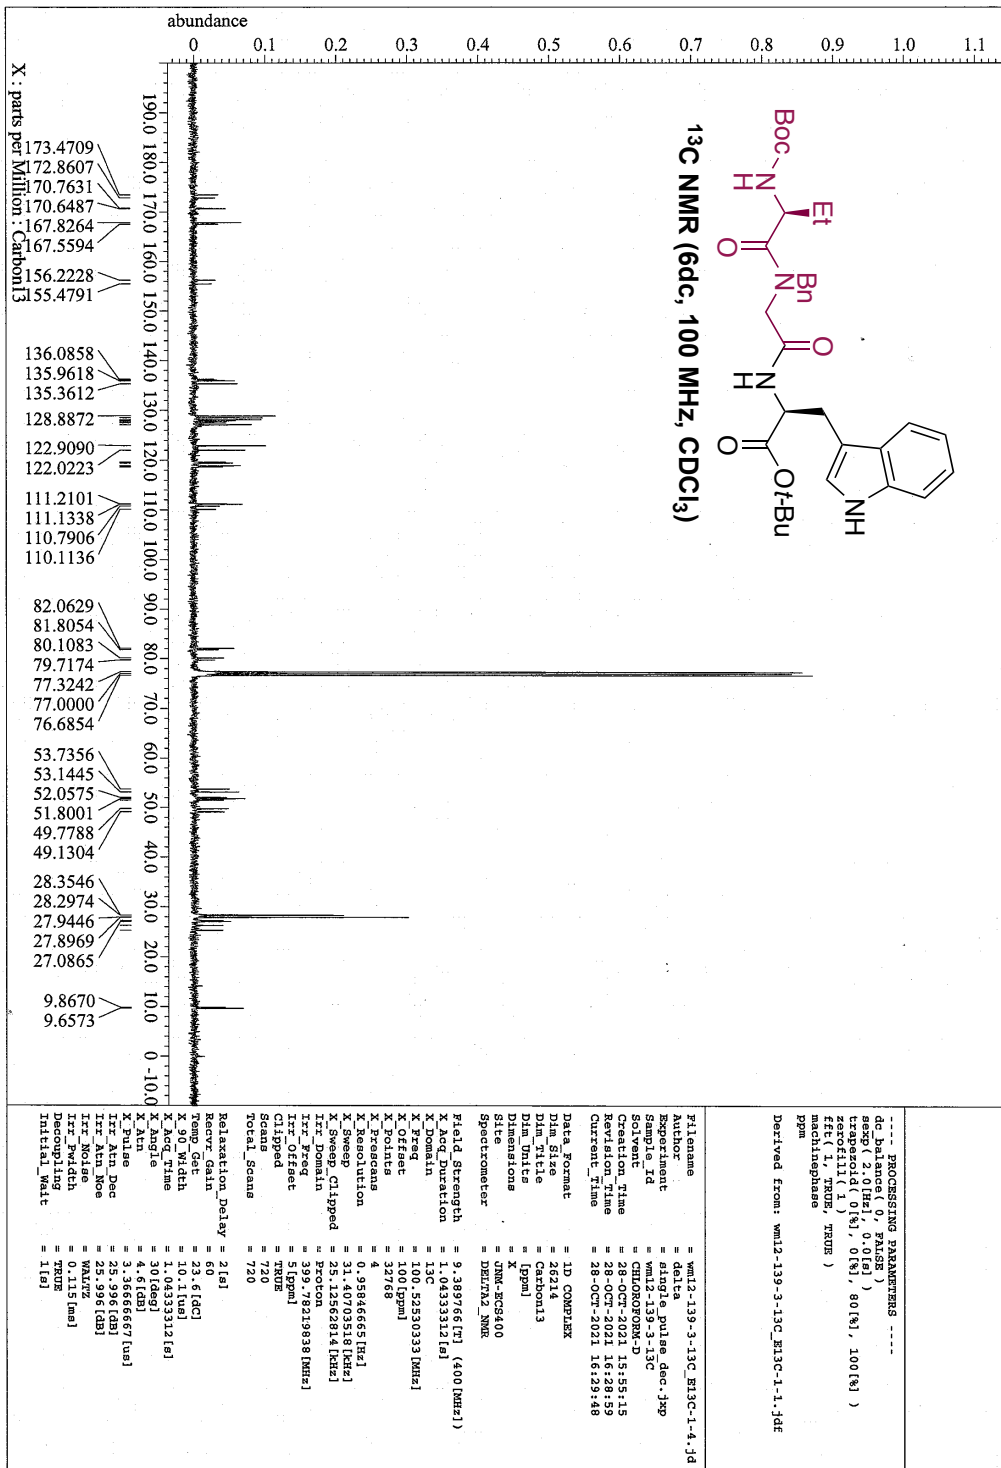

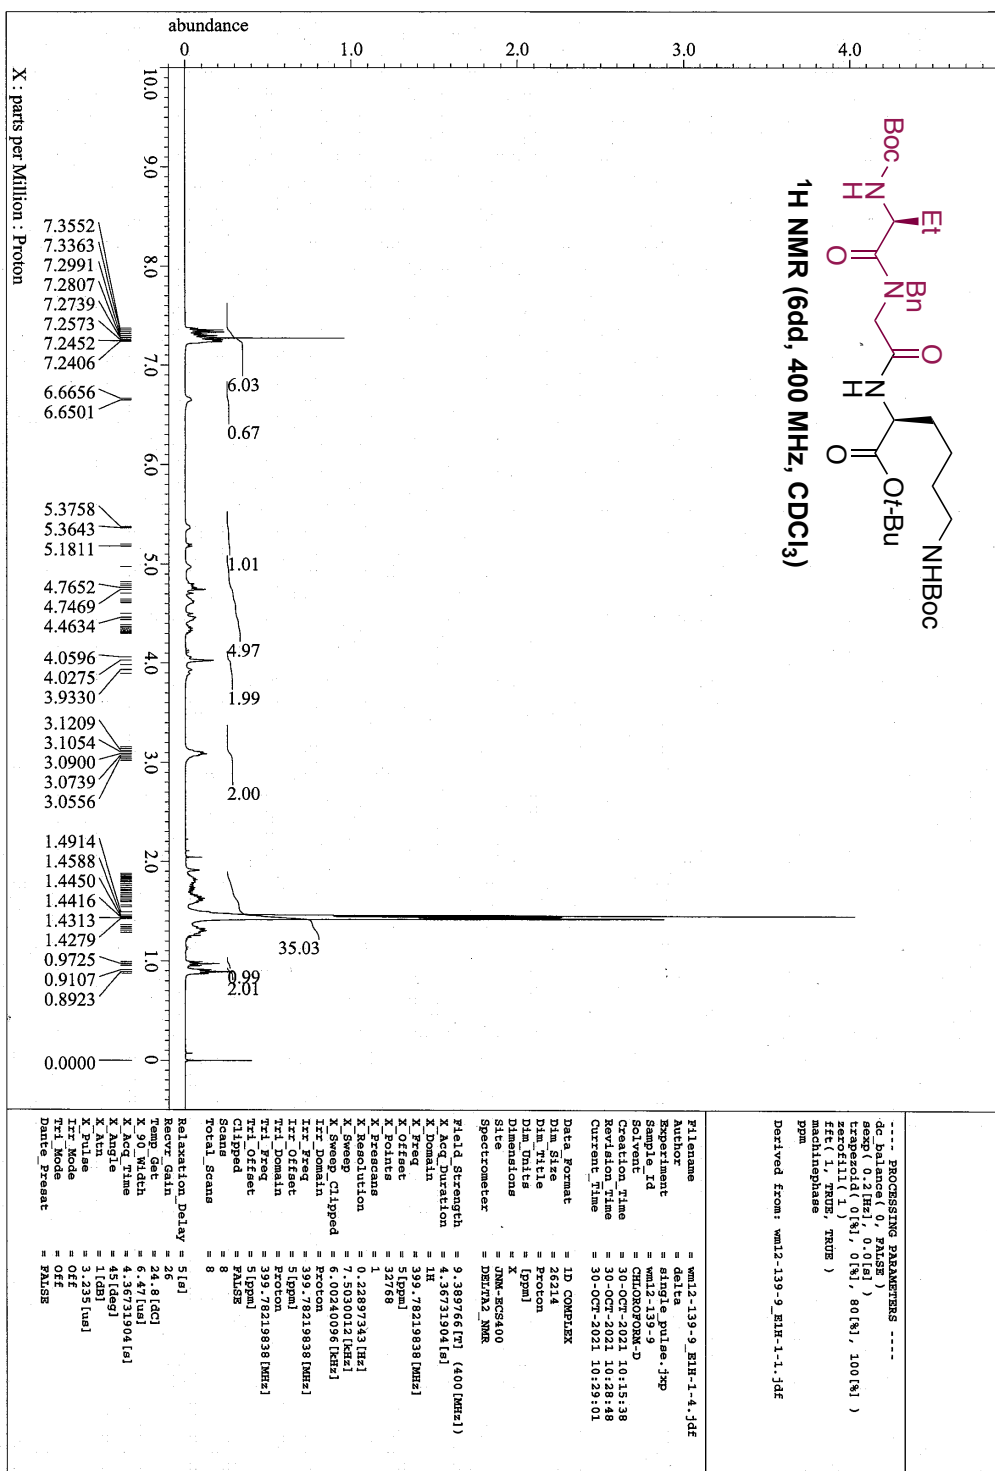





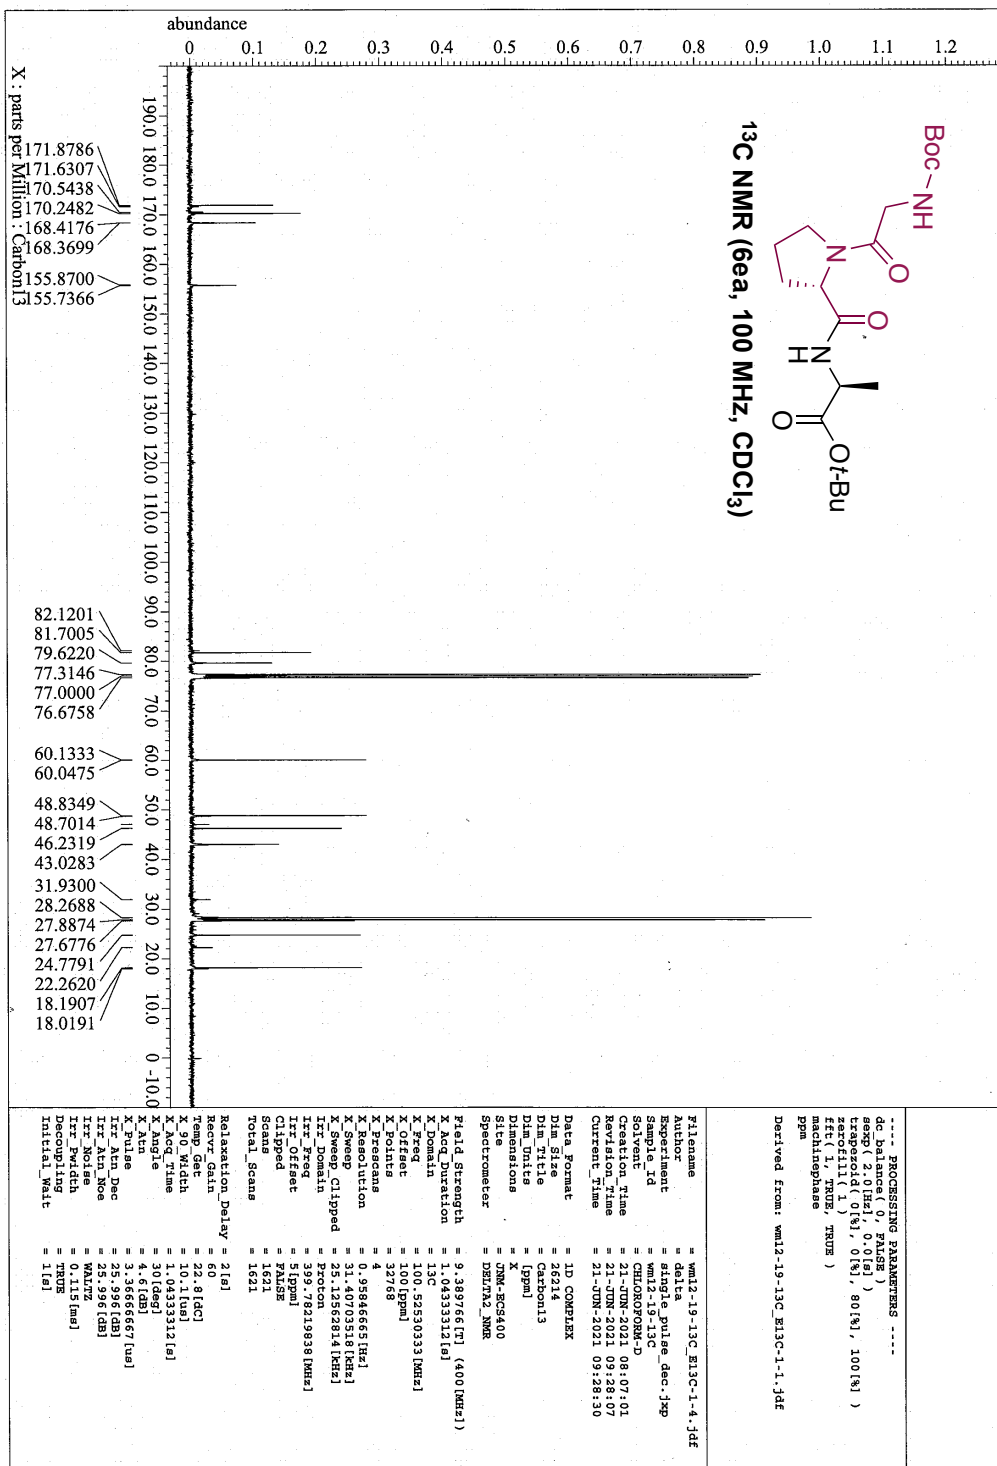







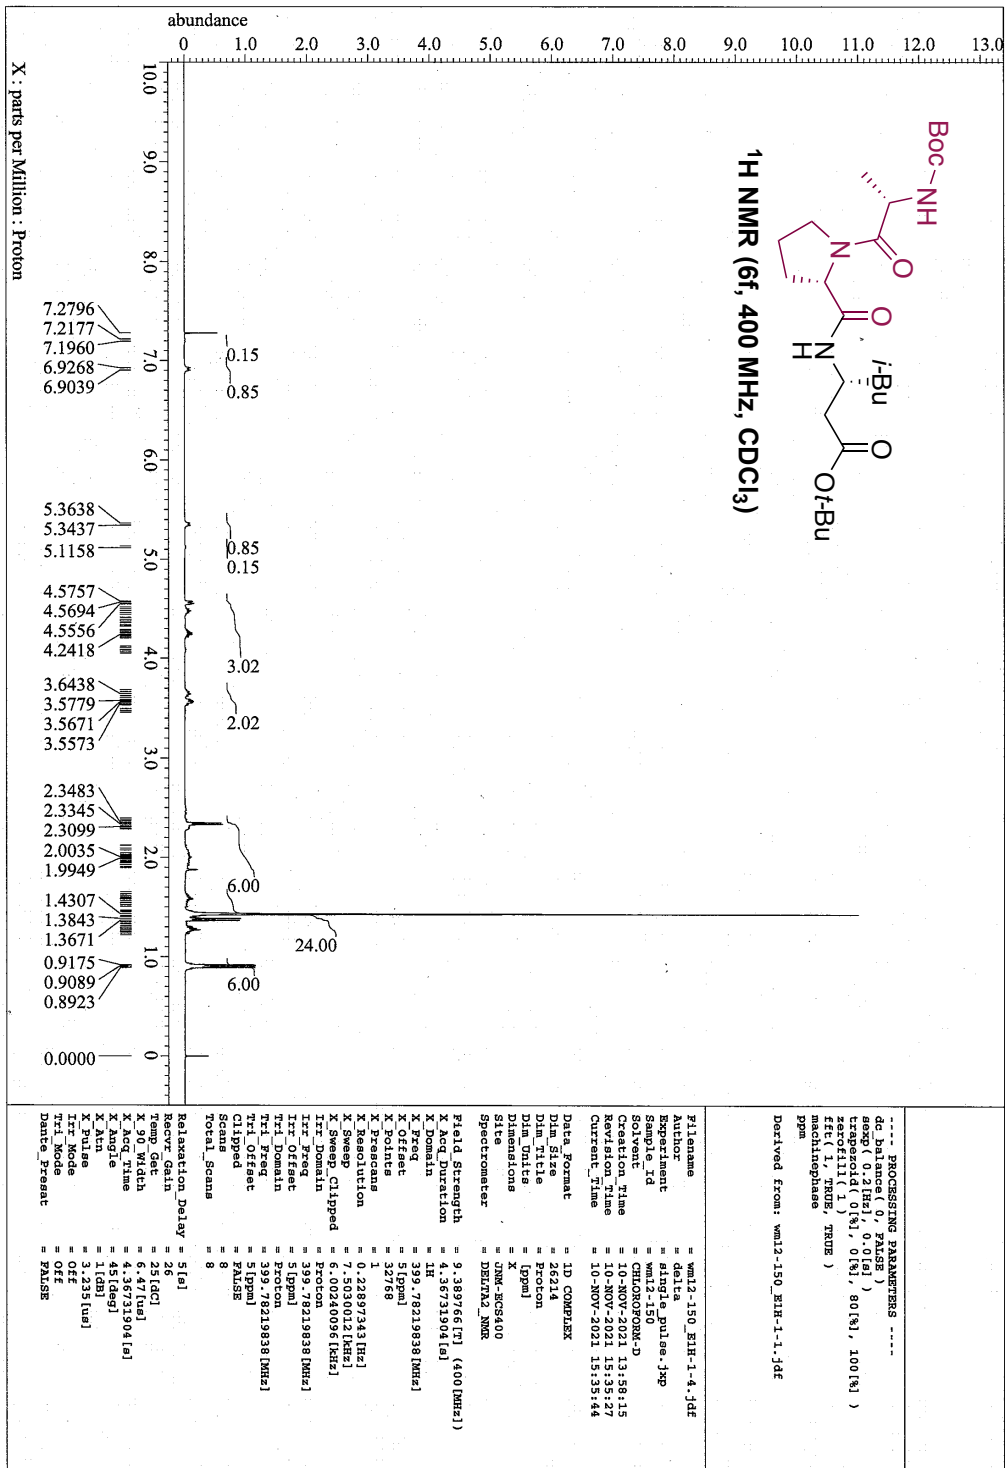

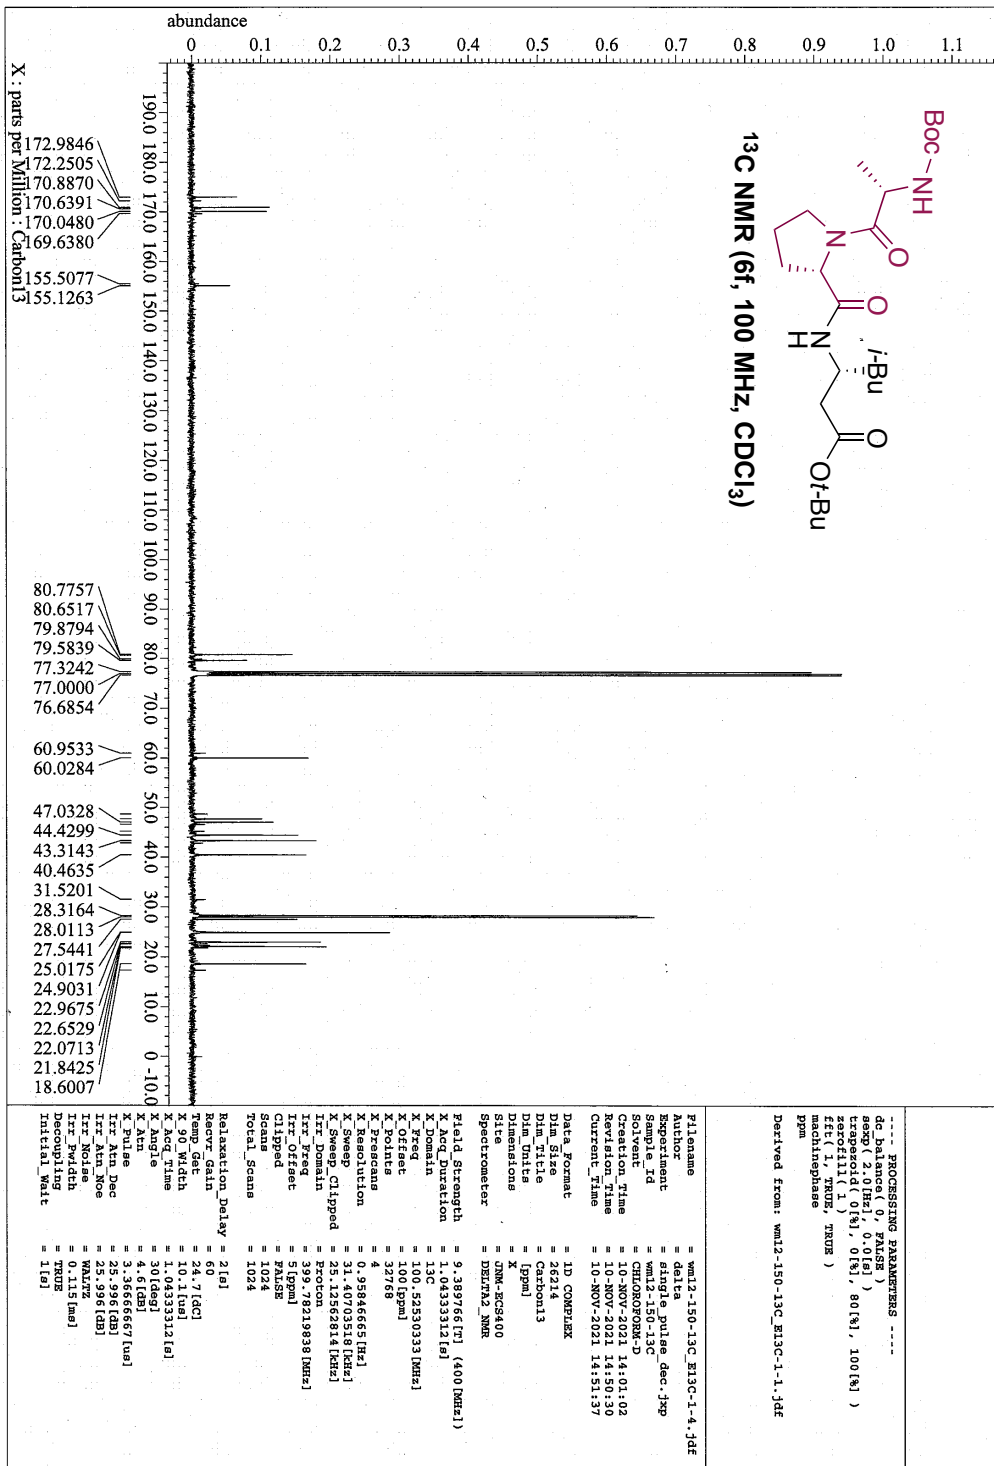



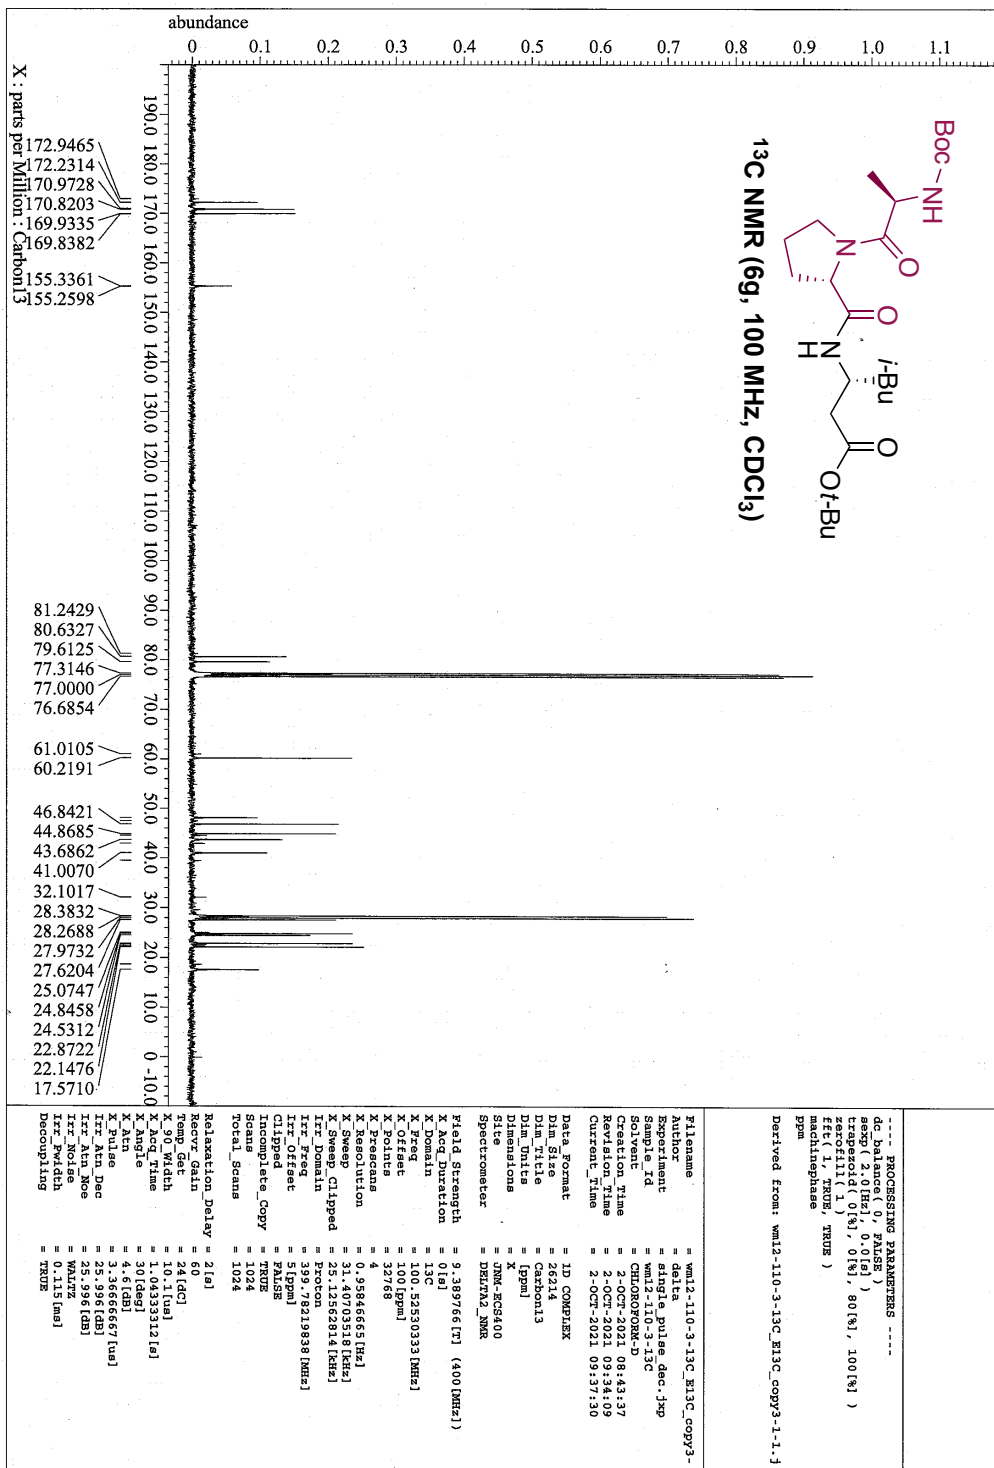

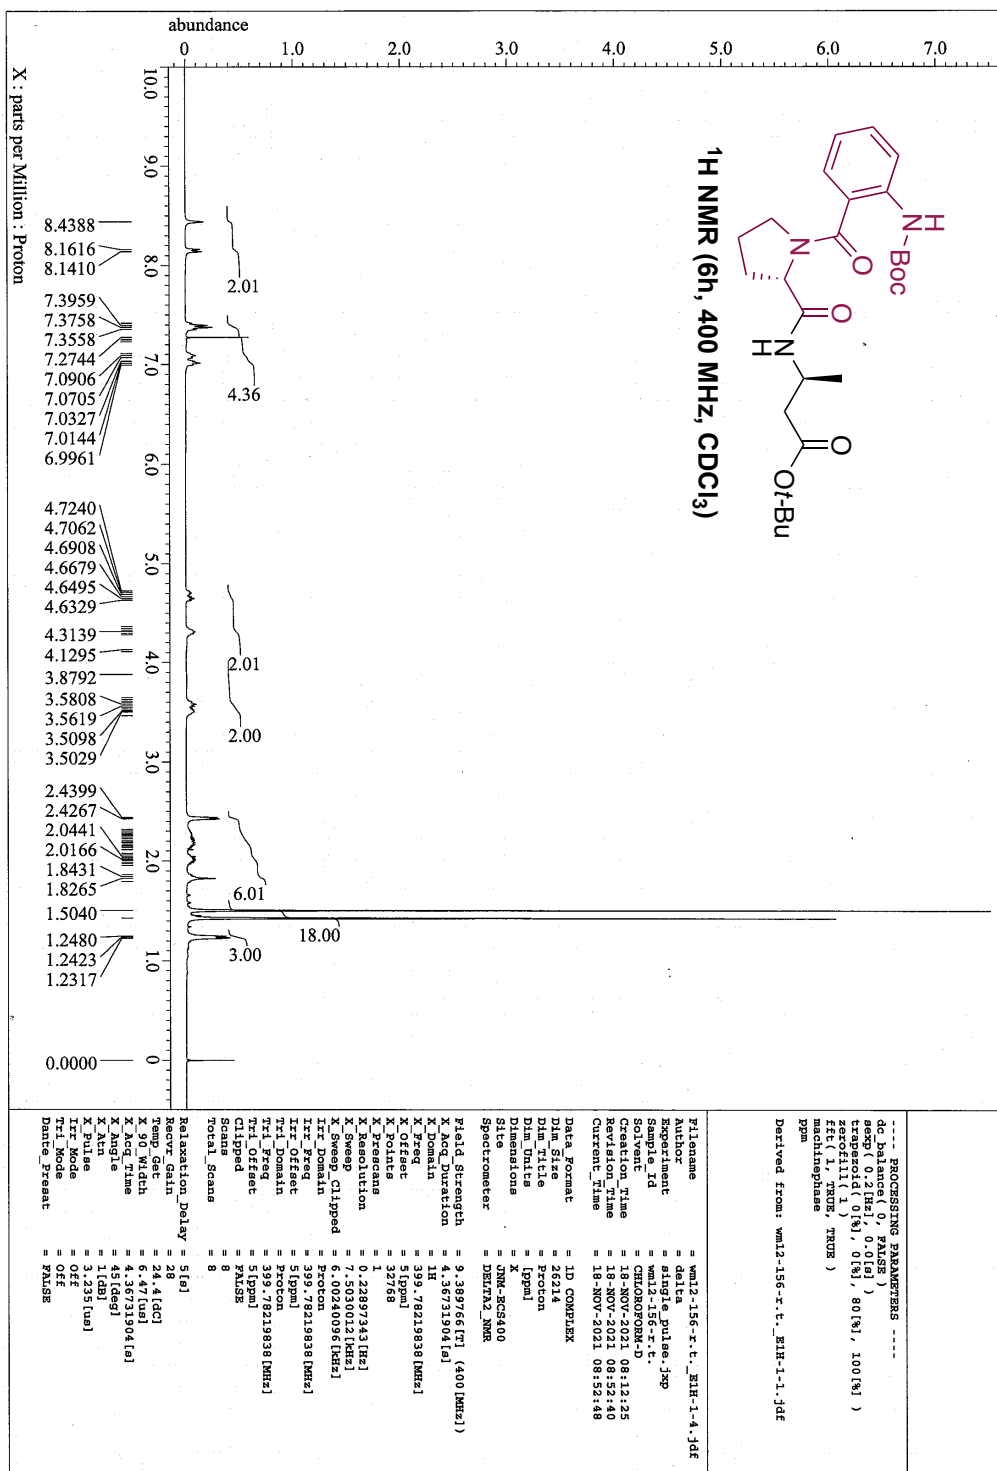











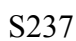



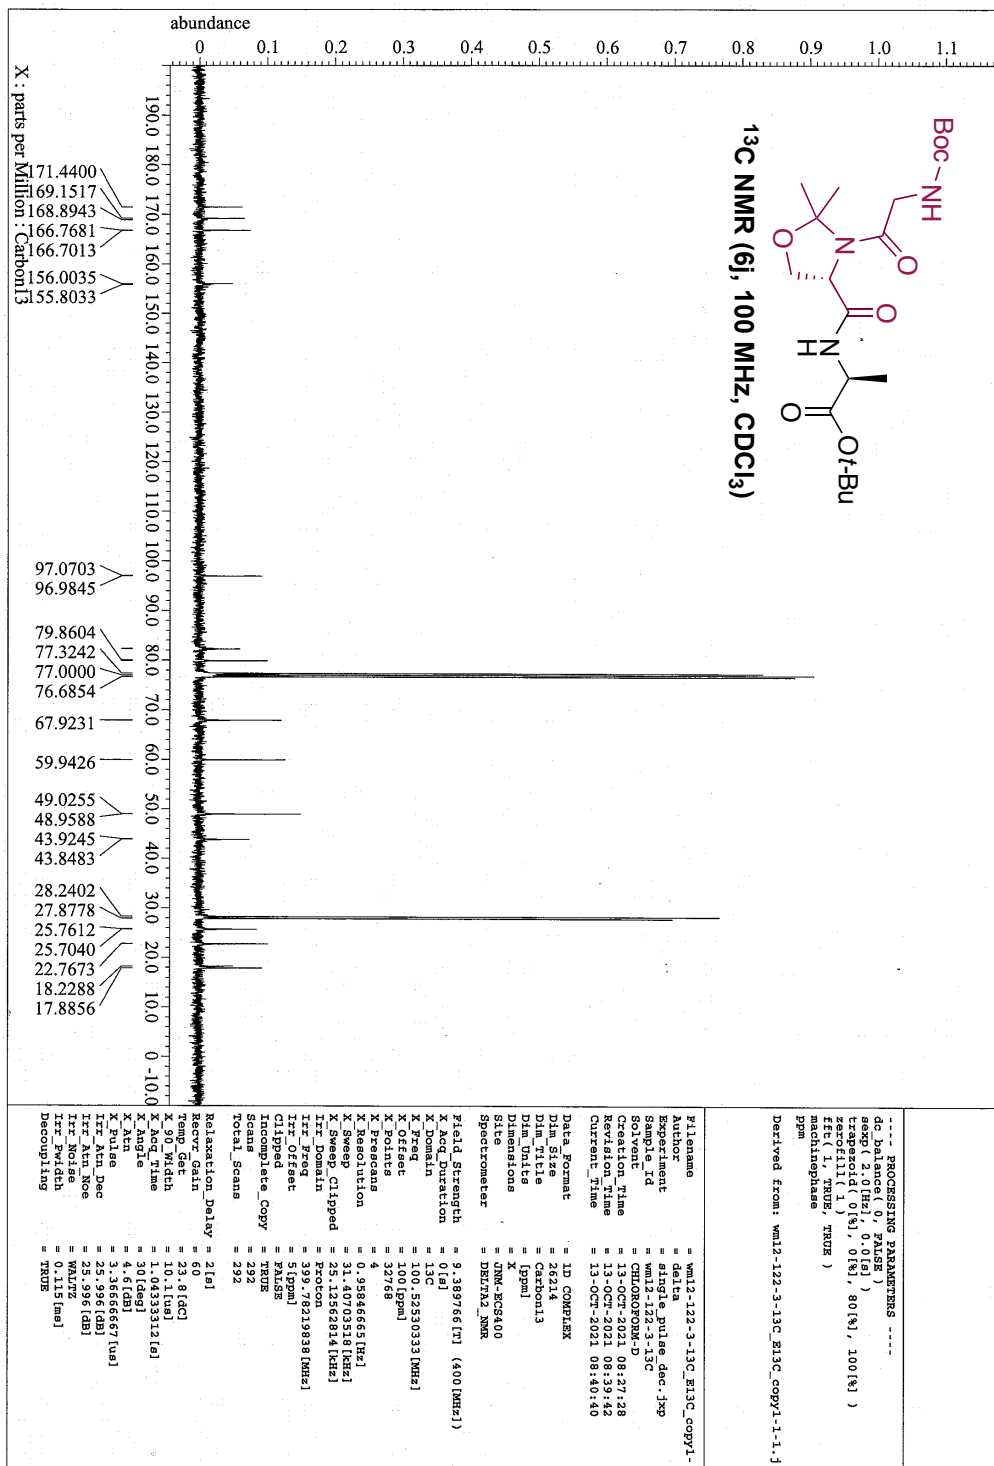

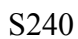

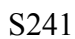

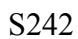



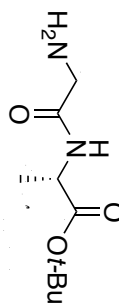

<sup>13</sup>C NMR (7, 100 MHz, CDCl<sub>3</sub>)

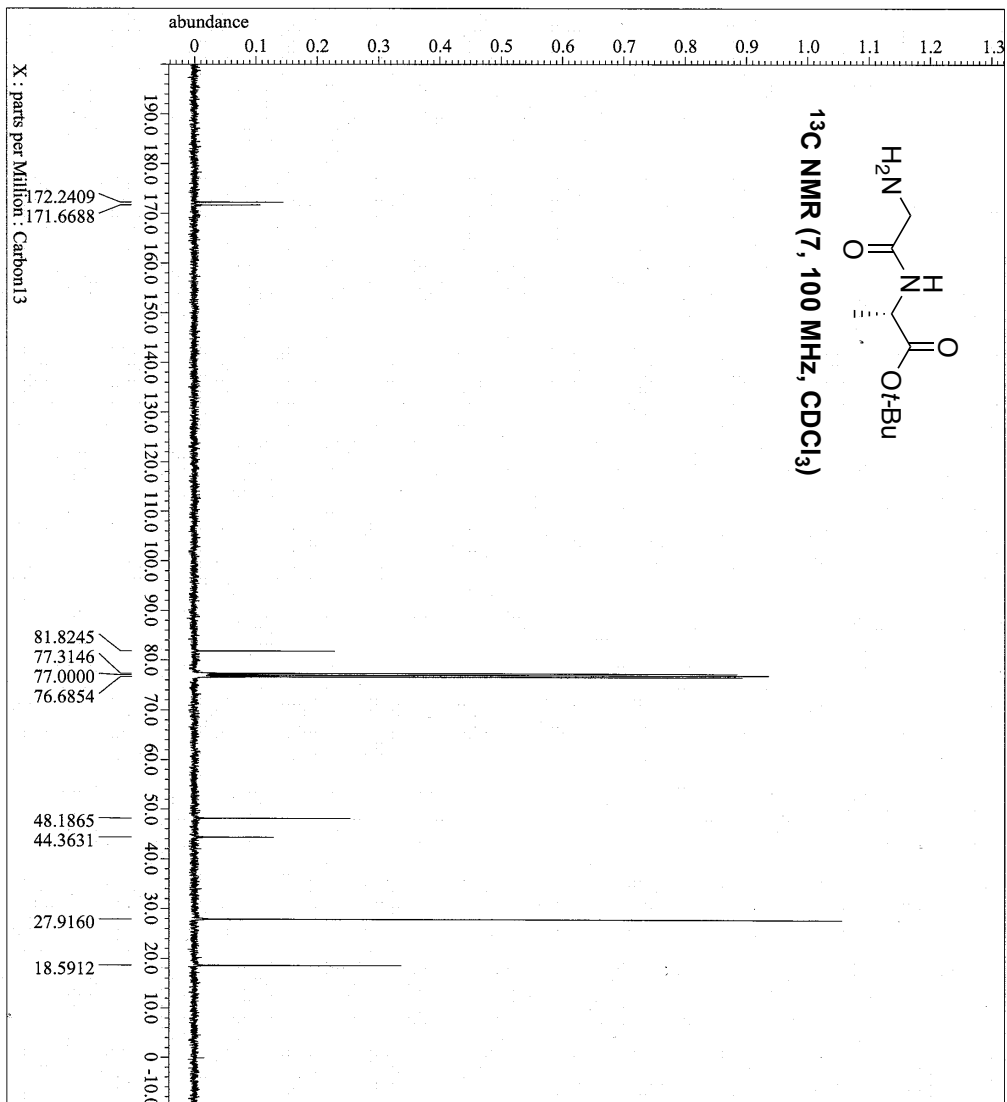

----- PROCESSING PARAMETERS -----  
 dc\_balance (0, FALSE)  
 freq (200 MHz, 0.014)  
 gamma (1.0000000000000000)  
 kernel (1.0000000000000000)  
 ffc (1, TRUE, TRUE)  
 machinephase  
 ppm

Derived from: wml2-172-13C\_E13C-1-1.j4f

Filename = wml2-172-13C\_E13C-1-1.j4f  
 Author = delta  
 Experiment = single\_pulse\_dec.j4p  
 Sample\_id = wml2-172-13C  
 Solvent = CHLOROFORM-D  
 Creation\_time = 6-DEC-2021 09:58:29  
 Data\_processing\_time = 6-DEC-2021 10:20:24  
 Current\_time = 6-DEC-2021 10:20:24  
 Data\_format = 1D COMPLEX  
 Dim\_size = 26214  
 Dim\_title = Carbon13  
 Dim\_units = ppm  
 Dimensions = 1  
 Site = JNM-KS400  
 Spectrometer = DELTA2\_NMR  
 Field\_strength = 9.389766 [T] (400 MHz)  
 X\_Acq\_Duration = 1.0433312 [s]  
 X\_Domain = 13C  
 X\_Freq = 52530333 [MHz]  
 X\_Offset = 100 [ppm]  
 X\_Points = 32768  
 X\_Precans = 4  
 X\_Resolution = 0.9584665 [Hz]  
 X\_Sweep\_Clippped = 31.40703518 [kHz]  
 X\_Sweep\_Domain = 25.12562814 [kHz]  
 X\_Sweep\_Freq = 399.78219838 [MHz]  
 X\_Offset = 5 [ppm]  
 Clipped = FALSE  
 Scans = 512  
 Total\_Scans = 512  
 Relaxation\_Delay = 2 [s]  
 Recycle\_Delay = 6 [s]  
 Temp\_Gate = 24.8 [deg]  
 X\_90\_Width = 10.1 [us]  
 X\_Acq\_Time = 1.0433312 [s]  
 X\_Angle = 30 [deg]  
 X\_Axis = 4.6 [dB]  
 X\_Pulse\_Proc = 3.8666667 [us]  
 X\_Pulse\_Proc2 = 3.8666667 [us]  
 X\_Pulse\_Proc3 = 25.996 [dB]  
 X\_Pulse\_Proc4 = 25.996 [dB]  
 X\_Pulse\_Proc5 = 0.115 [ms]  
 Decoupling = TRUE  
 Initial\_Wait = 1 [s]

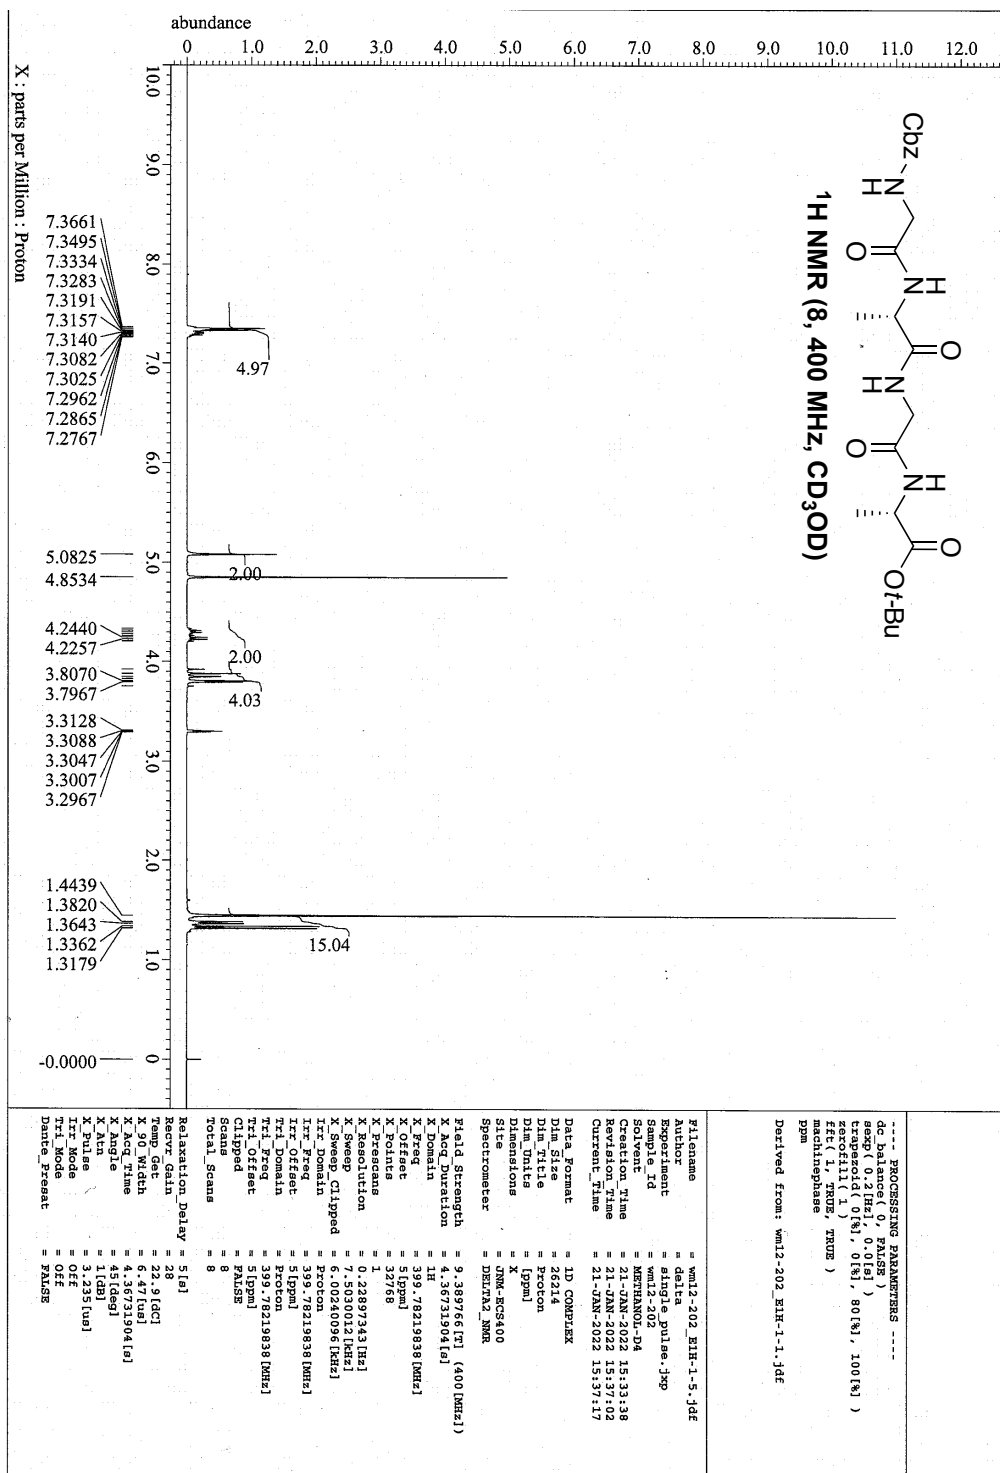















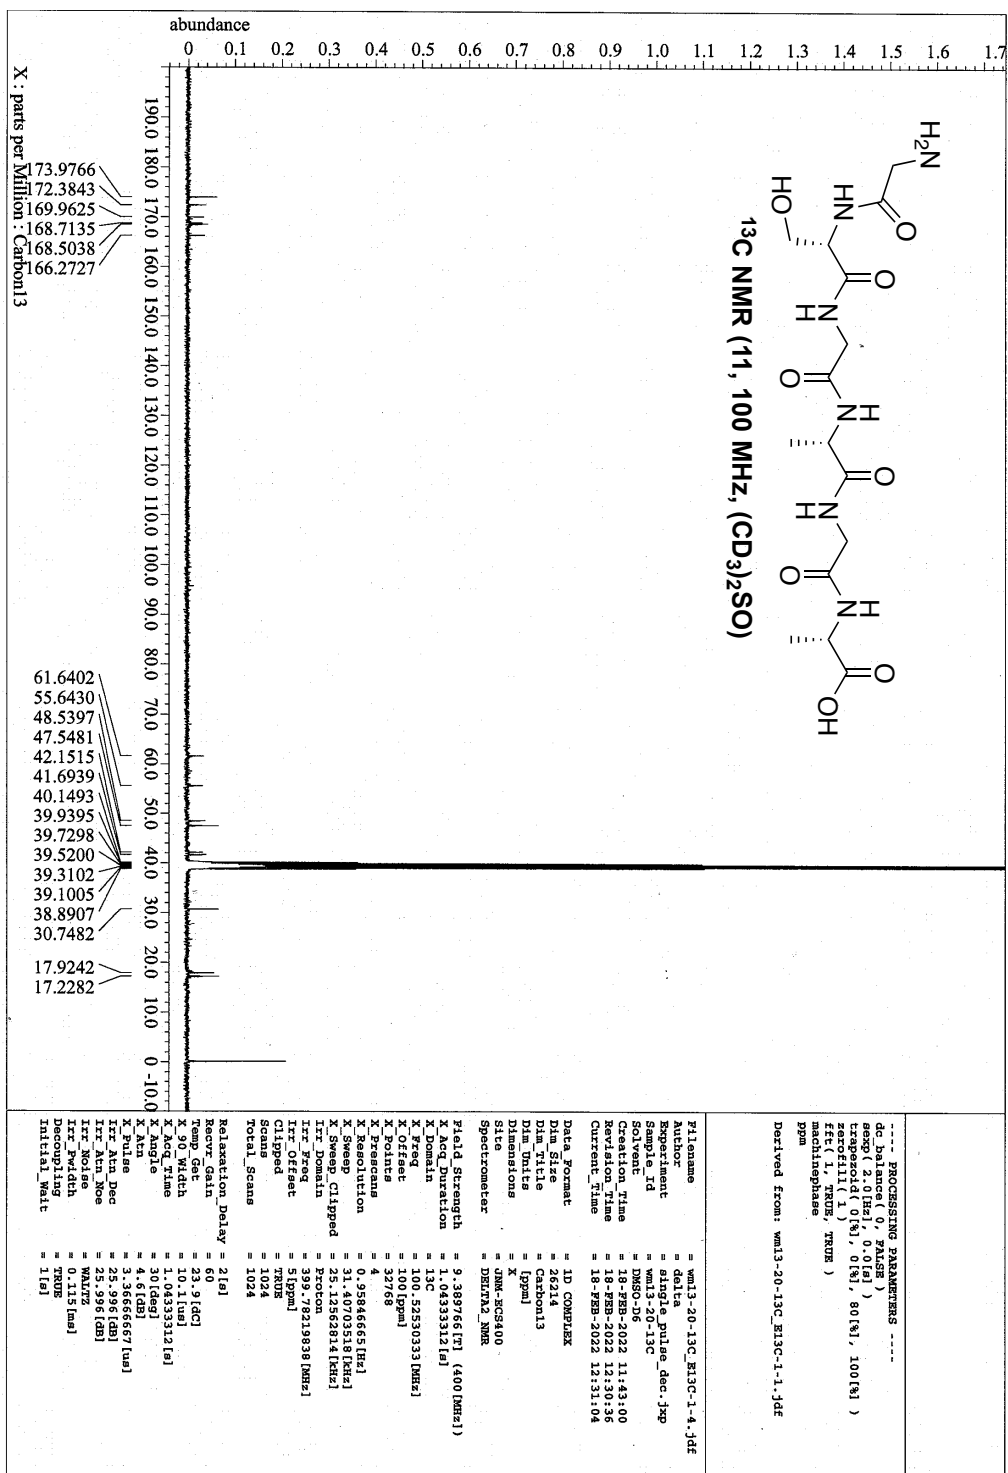

Supplement: d2sc01466a1.pdf [file d2sc01466a1.pdf]
